# Supplementary material for: Establishing and validating a pathway prognostic signature in pancreatic cancer based on miRNA and mRNA sets using GSVA
Source: Aging (Albany NY). 2020 Nov 10;12(22):22840–58. doi: 10.18632/aging.103965 (PMC7746356; doi:10.18632/aging.103965)
Supplement: Supplementary Table 2 [file aging-12-103965-s003..xlsx]

## Sheet: Sheet1
Supplementary Table 2. The miRWalk Pathways miRNA file containing a total of 484 miRNA sets.
hsa05020_Prion_diseases	Pathways	hsa-miR-377-3p	hsa-miR-424-5p	hsa-miR-28-5p	hsa-miR-7-5p	hsa-miR-497-5p	hsa-miR-210-3p	hsa-miR-199a-3p	hsa-miR-125a-5p	hsa-miR-1-3p	hsa-miR-215-5p	hsa-miR-130b-3p	hsa-miR-30a-5p	hsa-miR-196b-5p	hsa-miR-10b-5p	hsa-let-7b-5p	hsa-miR-30c-5p	hsa-miR-191-5p	hsa-miR-16-5p	hsa-miR-148a-3p	hsa-miR-197-3p	hsa-miR-15b-5p	hsa-miR-129-5p	hsa-miR-24-3p	hsa-miR-365a-3p	hsa-miR-22-3p	hsa-miR-93-3p	hsa-miR-193b-3p	hsa-miR-26b-5p	hsa-miR-26a-5p	hsa-miR-15a-5p	hsa-miR-204-5p	hsa-miR-331-3p	hsa-miR-10a-5p	hsa-miR-296-5p	hsa-miR-1180-3p	hsa-miR-92a-3p	hsa-miR-122-5p	hsa-miR-34c-5p	hsa-miR-21-5p	hsa-miR-320b	hsa-miR-29c-3p	hsa-miR-320a	hsa-miR-93-5p	hsa-miR-148b-3p	hsa-miR-483-5p	hsa-miR-615-3p	hsa-miR-34a-5p	hsa-miR-766-3p
hsa00051_Fructose_and_mannose_metabolism	Pathways	hsa-miR-125b-5p	hsa-miR-197-3p	hsa-miR-520a-3p	hsa-miR-125a-5p	hsa-miR-346	hsa-miR-30a-5p	hsa-miR-196b-5p	hsa-miR-330-3p	hsa-miR-10b-5p	hsa-miR-877-3p	hsa-miR-143-3p	hsa-miR-4326	hsa-miR-15b-5p	hsa-miR-195-5p	hsa-miR-330-5p	hsa-miR-93-3p	hsa-miR-193b-3p	hsa-miR-16-5p	hsa-miR-1260b	hsa-miR-484	hsa-miR-1301-3p	hsa-miR-15a-5p	hsa-miR-615-3p	hsa-miR-331-3p	hsa-miR-148b-3p	hsa-miR-92a-3p	hsa-miR-1296-5p	hsa-miR-93-5p	hsa-miR-342-5p	hsa-miR-21-5p	hsa-miR-520b	hsa-miR-520e	hsa-miR-10a-5p	hsa-miR-149-5p	hsa-miR-320b	hsa-miR-34a-5p	hsa-miR-145-5p	hsa-miR-324-3p	hsa-miR-1226-3p	hsa-let-7b-5p	hsa-miR-181a-5p	hsa-miR-98-5p	hsa-miR-423-3p	hsa-miR-9-5p	hsa-miR-23b-3p	hsa-miR-618	hsa-miR-122-5p	hsa-miR-92b-3p
hsa00532_Chondroitin_sulfate_biosynthesis	Pathways	hsa-miR-132-3p	hsa-miR-9-5p	hsa-miR-671-5p	hsa-miR-125b-5p	hsa-miR-1-3p	hsa-miR-215-5p	hsa-miR-10b-5p	hsa-miR-16-5p	hsa-miR-18a-5p	hsa-miR-15b-5p	hsa-miR-193b-3p	hsa-miR-26b-5p	hsa-miR-484	hsa-miR-1301-3p	hsa-miR-615-3p	hsa-miR-92a-3p	hsa-miR-1296-5p	hsa-miR-122-5p	hsa-miR-21-5p	hsa-miR-19b-3p	hsa-miR-766-3p	hsa-miR-186-5p	hsa-miR-17-5p	hsa-miR-1226-3p	hsa-let-7b-5p	hsa-miR-98-5p	hsa-miR-339-5p	hsa-miR-93-5p	hsa-miR-124-3p	hsa-miR-192-5p	hsa-miR-20a-5p	hsa-miR-671-3p	hsa-miR-335-5p	hsa-miR-375	hsa-miR-106a-5p	hsa-miR-126-5p
WP554_ACE_Inhibitor_Pathway	Pathways	hsa-miR-21-5p	hsa-miR-128-3p	hsa-miR-124-3p	hsa-miR-148b-3p	hsa-miR-802	hsa-miR-26b-5p	hsa-miR-135a-5p	hsa-miR-19b-3p	hsa-miR-155-5p	hsa-miR-744-5p	hsa-miR-24-3p	hsa-miR-335-5p	hsa-miR-142-3p	hsa-miR-1226-3p	hsa-miR-633
WP100_Glutathione_metabolism	Pathways	hsa-miR-346	hsa-miR-24-3p	hsa-miR-92b-3p	hsa-miR-124-3p	hsa-miR-193b-3p	hsa-miR-26b-5p	hsa-miR-15a-5p	hsa-miR-1-3p	hsa-miR-1226-3p	hsa-miR-155-5p	hsa-miR-30a-5p	hsa-miR-335-5p	hsa-miR-744-5p	hsa-miR-92a-3p	hsa-let-7b-5p	hsa-miR-181a-5p	hsa-miR-331-3p	hsa-miR-16-5p	hsa-miR-183-5p	hsa-miR-17-3p
hsa04142_Lysosome	Pathways	hsa-miR-125b-5p	hsa-miR-210-3p	hsa-miR-150-5p	hsa-miR-130b-3p	hsa-miR-218-5p	hsa-miR-877-3p	hsa-miR-33a-5p	hsa-miR-214-3p	hsa-miR-18a-5p	hsa-miR-296-3p	hsa-miR-99a-3p	hsa-miR-26b-5p	hsa-miR-484	hsa-miR-615-3p	hsa-miR-196a-5p	hsa-miR-92a-3p	hsa-miR-342-3p	hsa-miR-3943	hsa-miR-423-5p	hsa-miR-324-3p	hsa-miR-98-5p	hsa-miR-657	hsa-miR-92b-3p	hsa-miR-124-3p	hsa-miR-106b-5p	hsa-miR-744-5p	hsa-miR-101-3p	hsa-miR-503-5p	hsa-miR-200c-3p	hsa-miR-18a-3p	hsa-miR-193a-3p	hsa-miR-10b-5p	hsa-miR-25-3p	hsa-miR-30a-5p	hsa-miR-455-3p	hsa-miR-4326	hsa-miR-15b-5p	hsa-miR-7-5p	hsa-miR-1227-3p	hsa-miR-26a-5p	hsa-miR-15a-5p	hsa-miR-421	hsa-miR-1296-5p	hsa-miR-93-5p	hsa-miR-29a-3p	hsa-miR-30e-3p	hsa-miR-30a-3p	hsa-miR-652-3p
hsa05410_Hypertrophic_cardiomyopathy_HCM	Pathways	hsa-miR-125b-5p	hsa-miR-19b-1-5p	hsa-let-7a-5p	hsa-miR-9-3p	hsa-miR-877-3p	hsa-miR-296-3p	hsa-miR-671-5p	hsa-miR-26b-5p	hsa-miR-484	hsa-miR-615-3p	hsa-miR-196a-5p	hsa-miR-1229-3p	hsa-miR-92a-3p	hsa-miR-342-3p	hsa-miR-182-5p	hsa-miR-324-5p	hsa-miR-125a-5p	hsa-miR-423-5p	hsa-miR-98-5p	hsa-miR-32-5p	hsa-miR-124-3p	hsa-miR-644a	hsa-miR-744-5p	hsa-miR-18a-3p	hsa-miR-30c-5p	hsa-miR-877-5p	hsa-miR-455-3p	hsa-miR-15b-5p	hsa-miR-99a-5p	hsa-miR-24-3p	hsa-miR-1227-3p	hsa-miR-26a-5p	hsa-miR-93-5p	hsa-miR-29a-3p	hsa-miR-326	hsa-miR-1307-3p	hsa-miR-652-3p	hsa-miR-148b-3p	hsa-miR-221-3p	hsa-miR-194-5p	hsa-miR-19b-3p	hsa-miR-222-3p	hsa-miR-940	hsa-miR-29b-3p	hsa-miR-769-5p	hsa-miR-133a-3p	hsa-miR-633	hsa-miR-130b-3p
hsa00514_O_Mannosyl_glycan_biosynthesis	Pathways	hsa-miR-222-3p	hsa-miR-330-5p	hsa-miR-93-3p	hsa-miR-744-5p	hsa-miR-92a-3p	hsa-miR-146b-5p	hsa-miR-103a-3p
hsa05014_Amyotrophic_lateral_sclerosis_ALS	Pathways	hsa-miR-125b-5p	hsa-miR-150-5p	hsa-miR-24-2-5p	hsa-miR-130b-3p	hsa-miR-96-5p	hsa-miR-33a-5p	hsa-miR-143-3p	hsa-miR-214-3p	hsa-miR-34c-5p	hsa-miR-26b-5p	hsa-miR-484	hsa-miR-204-5p	hsa-miR-196a-5p	hsa-miR-92a-3p	hsa-miR-182-5p	hsa-miR-324-5p	hsa-miR-125a-5p	hsa-miR-615-3p	hsa-miR-532-3p	hsa-miR-181d-5p	hsa-miR-30d-5p	hsa-miR-92b-3p	hsa-miR-32-5p	hsa-miR-124-3p	hsa-miR-106b-5p	hsa-miR-181c-5p	hsa-miR-101-3p	hsa-miR-200c-3p	hsa-miR-491-5p	hsa-miR-25-3p	hsa-miR-30a-5p	hsa-miR-1285-3p	hsa-miR-148a-3p	hsa-miR-15b-5p	hsa-miR-24-3p	hsa-miR-15a-5p	hsa-miR-429	hsa-miR-296-5p	hsa-miR-324-3p	hsa-miR-29a-3p	hsa-miR-652-3p	hsa-miR-148b-3p	hsa-miR-221-3p	hsa-miR-194-5p	hsa-miR-19b-3p	hsa-miR-222-3p	hsa-miR-605-5p	hsa-miR-29b-3p
hsa03020_RNA_polymerase	Pathways	hsa-miR-1229-3p	hsa-miR-149-5p	hsa-miR-1-3p	hsa-miR-30a-5p	hsa-miR-455-3p	hsa-miR-10b-5p	hsa-miR-30d-5p	hsa-miR-331-3p	hsa-miR-16-5p	hsa-miR-24-3p	hsa-miR-365a-3p	hsa-miR-155-5p	hsa-miR-193b-3p	hsa-let-7e-5p	hsa-miR-1260b	hsa-miR-484	hsa-miR-1301-3p	hsa-miR-1296-5p	hsa-miR-615-3p	hsa-miR-454-3p	hsa-miR-1268a	hsa-miR-196a-5p	hsa-miR-1180-3p	hsa-miR-421	hsa-miR-324-3p	hsa-miR-93-5p	hsa-miR-324-5p	hsa-miR-21-5p	hsa-miR-652-3p	hsa-miR-10a-5p	hsa-miR-34a-5p	hsa-miR-186-5p	hsa-miR-7-5p	hsa-let-7d-5p	hsa-miR-92a-3p	hsa-let-7b-5p	hsa-miR-769-3p	hsa-miR-98-5p	hsa-miR-423-3p	hsa-miR-378a-5p	hsa-miR-339-5p	hsa-miR-374a-3p	hsa-miR-17-3p	hsa-miR-124-3p	hsa-miR-99a-3p	hsa-miR-744-5p	hsa-miR-423-5p	hsa-miR-320a
hsa00533_Keratan_sulfate_biosynthesis	Pathways	hsa-miR-18a-5p	hsa-miR-125b-5p	hsa-miR-1-3p	hsa-miR-96-5p	hsa-miR-615-3p	hsa-miR-16-5p	hsa-miR-15b-5p	hsa-miR-26b-5p	hsa-miR-484	hsa-miR-204-5p	hsa-miR-92a-3p	hsa-miR-324-3p	hsa-miR-122-5p	hsa-miR-34a-5p	hsa-miR-221-3p	hsa-miR-98-5p	hsa-miR-128-3p	hsa-miR-124-3p	hsa-miR-20a-5p	hsa-let-7c-5p	hsa-miR-155-5p	hsa-miR-335-5p	hsa-miR-760
hsa00562_Inositol_phosphate_metabolism	Pathways	hsa-miR-18a-5p	hsa-miR-125b-5p	hsa-miR-125a-5p	hsa-miR-141-3p	hsa-miR-877-3p	hsa-miR-214-3p	hsa-miR-1914-3p	hsa-miR-22-3p	hsa-miR-26b-5p	hsa-miR-484	hsa-miR-615-3p	hsa-miR-92a-3p	hsa-miR-182-5p	hsa-miR-423-5p	hsa-miR-519c-3p	hsa-miR-144-3p	hsa-miR-98-5p	hsa-let-7i-5p	hsa-miR-32-5p	hsa-miR-124-3p	hsa-miR-106b-5p	hsa-miR-744-5p	hsa-miR-101-3p	hsa-miR-328-3p	hsa-miR-877-5p	hsa-miR-15b-5p	hsa-miR-7-5p	hsa-miR-26a-5p	hsa-miR-15a-5p	hsa-miR-421	hsa-miR-324-3p	hsa-miR-93-5p	hsa-miR-29a-3p	hsa-miR-326	hsa-miR-148b-3p	hsa-miR-221-3p	hsa-miR-19b-3p	hsa-miR-222-3p	hsa-miR-29b-3p	hsa-miR-23b-3p	hsa-miR-320e	hsa-miR-320b	hsa-miR-320a	hsa-miR-27b-3p	hsa-miR-132-3p	hsa-miR-671-5p	hsa-miR-1229-3p	hsa-miR-10b-5p
hsa00410_beta_Alanine_metabolism	Pathways	hsa-miR-497-5p	hsa-miR-152-3p	hsa-miR-130b-5p	hsa-miR-149-5p	hsa-miR-1-3p	hsa-miR-215-5p	hsa-let-7a-5p	hsa-miR-100-5p	hsa-miR-455-3p	hsa-miR-328-3p	hsa-miR-877-3p	hsa-miR-16-5p	hsa-miR-15b-5p	hsa-miR-7-5p	hsa-miR-744-5p	hsa-miR-193b-3p	hsa-miR-26b-5p	hsa-miR-484	hsa-miR-615-3p	hsa-miR-92a-3p	hsa-miR-324-3p	hsa-miR-34a-5p	hsa-miR-186-5p	hsa-miR-423-5p	hsa-miR-1226-3p	hsa-let-7b-5p	hsa-miR-98-5p	hsa-miR-128-3p	hsa-miR-7-1-3p	hsa-miR-124-3p	hsa-miR-192-5p	hsa-miR-27a-3p	hsa-miR-155-5p	hsa-miR-99b-5p	hsa-miR-335-5p	hsa-miR-320a	hsa-miR-421	hsa-let-7f-5p
hsa01100_Metabolic_pathways	Pathways	hsa-miR-125b-5p	hsa-miR-103a-2-5p	hsa-miR-2110	hsa-miR-210-3p	hsa-miR-186-3p	hsa-miR-125a-5p	hsa-let-7a-5p	hsa-miR-96-5p	hsa-miR-218-5p	hsa-miR-877-3p	hsa-miR-942-5p	hsa-miR-143-3p	hsa-miR-214-3p	hsa-miR-18a-5p	hsa-miR-296-3p	hsa-miR-1914-3p	hsa-miR-3181	hsa-miR-99a-3p	hsa-miR-762	hsa-miR-26b-5p	hsa-miR-484	hsa-miR-615-3p	hsa-miR-196a-5p	hsa-miR-616-3p	hsa-miR-1180-3p	hsa-miR-92a-3p	hsa-miR-342-3p	hsa-miR-550a-5p	hsa-miR-182-5p	hsa-miR-324-5p	hsa-miR-19a-3p	hsa-miR-520b	hsa-miR-520e	hsa-miR-874-3p	hsa-miR-373-3p	hsa-miR-140-3p	hsa-miR-501-5p	hsa-miR-766-3p	hsa-let-7c-3p	hsa-miR-505-5p	hsa-miR-423-5p	hsa-miR-181d-5p	hsa-miR-199a-3p	hsa-miR-30d-5p	hsa-miR-1909-5p	hsa-miR-98-5p	hsa-miR-7-1-3p	hsa-let-7i-5p
hsa00860_Porphyrin_and_chlorophyll_metabolism	Pathways	hsa-miR-125b-5p	hsa-miR-1-3p	hsa-miR-130b-3p	hsa-miR-30a-5p	hsa-miR-10b-5p	hsa-miR-218-5p	hsa-miR-30c-5p	hsa-miR-16-5p	hsa-miR-148a-3p	hsa-miR-25-3p	hsa-miR-15b-5p	hsa-miR-222-3p	hsa-miR-193b-3p	hsa-let-7e-5p	hsa-miR-26b-5p	hsa-miR-484	hsa-miR-1301-3p	hsa-miR-331-3p	hsa-miR-196a-5p	hsa-miR-142-3p	hsa-miR-92a-3p	hsa-miR-122-5p	hsa-miR-148b-3p	hsa-miR-140-3p	hsa-miR-361-5p	hsa-miR-19b-3p	hsa-miR-937-3p	hsa-miR-186-5p	hsa-miR-128-3p	hsa-miR-17-5p	hsa-miR-98-5p	hsa-miR-941	hsa-miR-93-5p	hsa-miR-29b-2-5p	hsa-miR-423-3p	hsa-miR-124-3p	hsa-miR-192-5p	hsa-miR-92b-3p	hsa-miR-155-5p	hsa-miR-335-5p	hsa-miR-320a	hsa-miR-375	hsa-miR-760
hsa04610_Complement_and_coagulation_cascades	Pathways	hsa-miR-132-3p	hsa-miR-9-5p	hsa-miR-1-3p	hsa-miR-215-5p	hsa-miR-130b-3p	hsa-miR-146a-5p	hsa-miR-877-3p	hsa-miR-520e	hsa-miR-16-5p	hsa-miR-340-5p	hsa-miR-7-5p	hsa-miR-193b-3p	hsa-miR-143-3p	hsa-miR-26b-5p	hsa-miR-204-5p	hsa-miR-548b-3p	hsa-miR-142-3p	hsa-miR-92a-3p	hsa-miR-122-5p	hsa-miR-93-5p	hsa-miR-29a-3p	hsa-miR-409-3p	hsa-miR-21-5p	hsa-miR-520b	hsa-miR-29c-3p	hsa-miR-652-3p	hsa-miR-10a-5p	hsa-miR-99a-5p	hsa-miR-361-5p	hsa-miR-19b-3p	hsa-miR-145-5p	hsa-miR-186-5p	hsa-miR-301a-3p	hsa-let-7a-5p	hsa-let-7b-5p	hsa-miR-181a-5p	hsa-miR-144-3p	hsa-miR-98-5p	hsa-miR-29b-3p	hsa-miR-23b-3p	hsa-miR-128-3p	hsa-miR-124-3p	hsa-miR-138-5p	hsa-miR-183-5p	hsa-miR-192-5p	hsa-miR-30c-5p	hsa-miR-155-5p	hsa-miR-101-3p
WP384_Apoptosis_Modulation_by_HSP70	Pathways	hsa-miR-132-3p	hsa-miR-9-5p	hsa-let-7g-5p	hsa-miR-210-3p	hsa-miR-149-5p	hsa-miR-1-3p	hsa-miR-215-5p	hsa-miR-130b-3p	hsa-miR-146a-5p	hsa-miR-30c-5p	hsa-miR-16-5p	hsa-miR-148a-3p	hsa-miR-15b-5p	hsa-miR-7-5p	hsa-miR-146b-5p	hsa-miR-155-5p	hsa-miR-193b-3p	hsa-let-7e-5p	hsa-miR-26b-5p	hsa-miR-484	hsa-miR-15a-5p	hsa-miR-93-3p	hsa-miR-196a-5p	hsa-miR-92a-3p	hsa-miR-122-5p	hsa-miR-21-5p	hsa-miR-19b-1-5p	hsa-miR-361-5p	hsa-miR-34a-5p	hsa-miR-221-3p	hsa-miR-504-5p	hsa-miR-133a-3p	hsa-let-7a-5p	hsa-miR-30d-5p	hsa-miR-98-5p	hsa-miR-128-3p	hsa-miR-423-3p	hsa-miR-877-3p	hsa-miR-138-5p	hsa-miR-192-5p	hsa-miR-106b-5p	hsa-miR-320c	hsa-miR-335-5p	hsa-miR-421	hsa-miR-375	hsa-miR-106a-5p	hsa-miR-125a-5p
WP466_DNA_Replication	Pathways	hsa-miR-18a-5p	hsa-miR-484	hsa-miR-197-3p	hsa-miR-376a-3p	hsa-miR-1180-3p	hsa-miR-221-3p	hsa-miR-130b-5p	hsa-miR-149-5p	hsa-miR-302d-3p	hsa-miR-1-3p	hsa-miR-215-5p	hsa-miR-31-3p	hsa-miR-1914-5p	hsa-miR-100-5p	hsa-miR-455-3p	hsa-miR-10b-5p	hsa-miR-31-5p	hsa-let-7e-5p	hsa-miR-20a-5p	hsa-miR-99a-5p	hsa-miR-24-3p	hsa-miR-222-3p	hsa-miR-744-5p	hsa-miR-193b-3p	hsa-miR-16-5p	hsa-miR-26b-5p	hsa-miR-26a-5p	hsa-miR-1301-3p	hsa-miR-15a-5p	hsa-miR-615-3p	hsa-miR-885-5p	hsa-miR-93-3p	hsa-miR-505-3p	hsa-miR-196a-5p	hsa-miR-501-3p	hsa-miR-30a-5p	hsa-miR-142-3p	hsa-miR-92a-3p	hsa-miR-1296-5p	hsa-miR-93-5p	hsa-miR-29a-3p	hsa-miR-324-5p	hsa-miR-335-5p	hsa-miR-503-5p	hsa-miR-339-5p	hsa-miR-148b-3p	hsa-miR-501-5p	hsa-miR-449b-5p
WP383_Striated_Muscle_Contraction	Pathways	hsa-miR-9-5p	hsa-miR-26a-5p	hsa-miR-3605-3p	hsa-miR-197-3p	hsa-miR-99b-3p	hsa-miR-1180-3p	hsa-miR-339-5p	hsa-miR-130b-5p	hsa-miR-149-5p	hsa-miR-1-3p	hsa-miR-215-5p	hsa-miR-30c-5p	hsa-miR-877-5p	hsa-miR-96-5p	hsa-miR-10b-5p	hsa-miR-877-3p	hsa-miR-31-5p	hsa-miR-16-5p	hsa-miR-28-5p	hsa-miR-99a-5p	hsa-miR-296-3p	hsa-miR-222-3p	hsa-miR-1227-3p	hsa-miR-193b-3p	hsa-miR-26b-5p	hsa-miR-484	hsa-miR-1301-3p	hsa-miR-935	hsa-miR-331-3p	hsa-miR-148b-3p	hsa-miR-30a-5p	hsa-miR-155-5p	hsa-miR-92a-3p	hsa-miR-342-3p	hsa-miR-182-5p	hsa-miR-324-5p	hsa-miR-769-5p	hsa-miR-21-5p	hsa-miR-326	hsa-miR-7-5p	hsa-miR-1307-3p	hsa-miR-652-3p	hsa-miR-10a-5p	hsa-miR-125a-5p	hsa-miR-615-3p	hsa-miR-361-5p	hsa-miR-23a-3p	hsa-miR-34a-5p
WP707_DNA_damage_response	Pathways	hsa-miR-125b-5p	hsa-miR-210-3p	hsa-miR-150-5p	hsa-miR-19b-1-5p	hsa-miR-675-5p	hsa-miR-130b-3p	hsa-miR-96-5p	hsa-miR-218-5p	hsa-miR-877-3p	hsa-miR-942-5p	hsa-miR-143-3p	hsa-miR-214-3p	hsa-miR-149-3p	hsa-miR-34c-5p	hsa-miR-22-3p	hsa-miR-26b-5p	hsa-miR-484	hsa-miR-615-3p	hsa-miR-885-5p	hsa-miR-196a-5p	hsa-miR-1229-3p	hsa-miR-92a-3p	hsa-miR-342-3p	hsa-miR-182-5p	hsa-miR-324-5p	hsa-miR-520b	hsa-miR-125a-5p	hsa-miR-338-3p	hsa-miR-766-3p	hsa-miR-320b	hsa-miR-505-5p	hsa-miR-423-5p	hsa-miR-190a-5p	hsa-miR-30d-5p	hsa-miR-98-5p	hsa-let-7i-5p	hsa-miR-657	hsa-miR-32-5p	hsa-miR-124-3p	hsa-miR-106b-5p	hsa-miR-1303	hsa-miR-744-5p	hsa-miR-101-3p	hsa-miR-374a-5p	hsa-miR-503-5p	hsa-miR-200c-3p	hsa-miR-18a-3p	hsa-miR-223-3p
hsa00071_Fatty_acid_metabolism	Pathways	hsa-miR-132-3p	hsa-miR-9-5p	hsa-miR-197-3p	hsa-miR-497-5p	hsa-miR-1229-3p	hsa-miR-152-3p	hsa-miR-130b-5p	hsa-miR-1-3p	hsa-miR-215-5p	hsa-miR-31-3p	hsa-miR-30a-5p	hsa-miR-100-5p	hsa-miR-328-3p	hsa-miR-877-3p	hsa-miR-191-5p	hsa-miR-16-5p	hsa-miR-15b-5p	hsa-miR-340-5p	hsa-miR-7-5p	hsa-miR-193b-3p	hsa-miR-26b-5p	hsa-miR-484	hsa-miR-615-3p	hsa-miR-93-3p	hsa-miR-92a-3p	hsa-miR-221-3p	hsa-miR-21-5p	hsa-miR-99a-5p	hsa-miR-10a-5p	hsa-miR-34a-5p	hsa-let-7a-5p	hsa-miR-186-5p	hsa-miR-92b-5p	hsa-miR-877-5p	hsa-miR-1226-3p	hsa-let-7b-5p	hsa-miR-98-5p	hsa-miR-23b-3p	hsa-miR-128-3p	hsa-miR-378a-3p	hsa-miR-124-3p	hsa-miR-106b-5p	hsa-miR-192-5p	hsa-miR-20a-5p	hsa-let-7f-5p	hsa-miR-27a-3p	hsa-miR-155-5p	hsa-miR-151a-3p
hsa00592_alpha_Linolenic_acid_metabolism	Pathways	hsa-miR-128-3p	hsa-miR-146b-5p	hsa-miR-423-3p	hsa-miR-124-3p	hsa-miR-10a-5p	hsa-miR-26b-5p	hsa-miR-338-3p	hsa-miR-15a-5p	hsa-miR-615-3p	hsa-miR-449c-5p	hsa-miR-30a-5p	hsa-miR-92b-5p	hsa-miR-335-5p	hsa-miR-324-3p	hsa-let-7b-5p	hsa-miR-18a-3p	hsa-miR-500a-3p	hsa-miR-92b-3p
WP697_Estrogen_metabolism	Pathways	hsa-miR-340-5p	hsa-miR-296-3p	hsa-miR-199a-5p	hsa-miR-124-3p	hsa-miR-148b-3p	hsa-miR-631	hsa-miR-331-3p	hsa-miR-221-3p	hsa-let-7b-5p	hsa-miR-16-5p	hsa-miR-27b-3p
WP1423_Ganglio_Sphingolipid_Metabolism	Pathways	hsa-miR-132-3p	hsa-miR-186-5p	hsa-miR-7-5p	hsa-miR-335-5p
WP117_GPCRs_Other	Pathways	hsa-miR-203a-3p	hsa-miR-125b-5p	hsa-miR-221-3p	hsa-miR-1-3p	hsa-miR-30c-5p	hsa-miR-455-3p	hsa-miR-877-3p	hsa-miR-16-5p	hsa-miR-148a-3p	hsa-miR-10a-5p	hsa-miR-99a-5p	hsa-miR-296-3p	hsa-miR-26b-5p	hsa-miR-615-3p	hsa-miR-331-3p	hsa-miR-93-3p	hsa-miR-92a-3p	hsa-miR-324-5p	hsa-miR-21-5p	hsa-miR-326	hsa-miR-148b-3p	hsa-miR-338-3p	hsa-miR-19b-3p	hsa-miR-200c-3p	hsa-miR-504-5p	hsa-let-7a-5p	hsa-let-7b-5p	hsa-miR-181a-5p	hsa-miR-98-5p	hsa-miR-92b-3p	hsa-let-7i-5p	hsa-miR-128-3p	hsa-miR-17-3p	hsa-miR-124-3p	hsa-miR-20a-5p	hsa-miR-335-5p	hsa-miR-744-3p	hsa-miR-224-5p	hsa-miR-18a-3p	hsa-miR-27b-3p
hsa04062_Chemokine_signaling_pathway	Pathways	hsa-miR-125b-5p	hsa-miR-210-3p	hsa-miR-150-5p	hsa-miR-125a-5p	hsa-miR-941	hsa-miR-130b-3p	hsa-miR-96-5p	hsa-miR-141-3p	hsa-miR-218-5p	hsa-miR-877-3p	hsa-miR-143-3p	hsa-miR-149-3p	hsa-miR-296-3p	hsa-miR-22-3p	hsa-miR-324-3p	hsa-miR-26b-5p	hsa-miR-484	hsa-miR-615-3p	hsa-miR-497-5p	hsa-miR-1180-3p	hsa-miR-92a-3p	hsa-miR-182-5p	hsa-miR-324-5p	hsa-miR-320b	hsa-miR-766-3p	hsa-miR-423-5p	hsa-miR-181d-5p	hsa-miR-199a-3p	hsa-miR-30d-5p	hsa-miR-98-5p	hsa-miR-92b-3p	hsa-miR-32-5p	hsa-miR-124-3p	hsa-miR-106b-5p	hsa-miR-129-1-3p	hsa-miR-744-5p	hsa-miR-101-3p	hsa-miR-196b-5p	hsa-miR-200c-3p	hsa-miR-18a-3p	hsa-miR-193a-3p	hsa-miR-10b-5p	hsa-miR-518b	hsa-miR-302c-3p	hsa-miR-181c-5p	hsa-miR-25-3p	hsa-miR-877-5p	hsa-miR-326
WP2256_Integrated_Pancreatic_Cancer_Pathway	Pathways	hsa-miR-125b-5p	hsa-miR-559	hsa-miR-3934-5p	hsa-miR-210-3p	hsa-miR-150-5p	hsa-miR-19b-1-5p	hsa-miR-1226-3p	hsa-miR-96-5p	hsa-miR-218-5p	hsa-miR-30a-3p	hsa-miR-33a-5p	hsa-miR-143-3p	hsa-miR-214-3p	hsa-miR-149-3p	hsa-miR-429	hsa-miR-296-3p	hsa-miR-34c-5p	hsa-miR-22-3p	hsa-miR-26b-5p	hsa-miR-484	hsa-miR-615-3p	hsa-miR-885-5p	hsa-miR-501-5p	hsa-miR-497-5p	hsa-miR-196a-5p	hsa-miR-708-5p	hsa-miR-1229-3p	hsa-miR-92a-3p	hsa-miR-342-3p	hsa-miR-182-5p	hsa-miR-324-5p	hsa-miR-520b	hsa-miR-874-3p	hsa-miR-373-3p	hsa-miR-24-2-5p	hsa-miR-532-3p	hsa-miR-766-3p	hsa-miR-520g-3p	hsa-miR-505-5p	hsa-miR-423-5p	hsa-miR-190a-5p	hsa-miR-181d-5p	hsa-miR-199a-3p	hsa-miR-30d-5p	hsa-miR-144-3p	hsa-miR-98-5p	hsa-let-7i-5p	hsa-miR-92b-3p
WP107_Translation_Factors	Pathways	hsa-miR-125b-5p	hsa-miR-125a-5p	hsa-miR-1226-3p	hsa-miR-96-5p	hsa-miR-877-3p	hsa-miR-296-3p	hsa-miR-760	hsa-miR-484	hsa-miR-615-3p	hsa-miR-196a-5p	hsa-miR-361-3p	hsa-miR-92a-3p	hsa-miR-342-3p	hsa-miR-1228-3p	hsa-miR-501-5p	hsa-miR-505-5p	hsa-miR-423-5p	hsa-miR-98-5p	hsa-miR-92b-3p	hsa-miR-124-3p	hsa-miR-106b-5p	hsa-miR-23b-5p	hsa-miR-744-5p	hsa-miR-92a-1-5p	hsa-miR-18a-3p	hsa-miR-25-3p	hsa-miR-30a-5p	hsa-miR-455-3p	hsa-miR-15b-5p	hsa-miR-99a-5p	hsa-miR-7-5p	hsa-miR-340-3p	hsa-miR-1260b	hsa-miR-26a-5p	hsa-miR-421	hsa-miR-324-3p	hsa-miR-93-5p	hsa-miR-29a-3p	hsa-miR-652-3p	hsa-miR-221-3p	hsa-miR-941	hsa-miR-769-5p	hsa-miR-23b-3p	hsa-miR-423-3p	hsa-miR-320c	hsa-miR-335-5p	hsa-miR-320a	hsa-miR-26b-5p
hsa00903_Limonene_and_pinene_degradation	Pathways	hsa-miR-497-5p	hsa-miR-152-3p	hsa-miR-130b-5p	hsa-miR-125a-5p	hsa-miR-1-3p	hsa-miR-215-5p	hsa-miR-1226-3p	hsa-miR-30a-5p	hsa-miR-100-5p	hsa-miR-328-3p	hsa-miR-877-3p	hsa-miR-16-5p	hsa-miR-15b-5p	hsa-miR-7-5p	hsa-miR-193b-3p	hsa-miR-26b-5p	hsa-miR-484	hsa-miR-615-3p	hsa-miR-30b-5p	hsa-miR-92a-3p	hsa-miR-93-5p	hsa-miR-221-3p	hsa-miR-21-5p	hsa-miR-10a-5p	hsa-miR-361-5p	hsa-miR-34a-5p	hsa-miR-186-5p	hsa-miR-24-3p	hsa-let-7d-5p	hsa-let-7a-5p	hsa-let-7b-5p	hsa-miR-181a-5p	hsa-miR-98-5p	hsa-miR-128-3p	hsa-miR-423-3p	hsa-miR-124-3p	hsa-miR-192-5p	hsa-miR-27a-3p	hsa-miR-155-5p	hsa-miR-99b-5p	hsa-miR-335-5p	hsa-miR-421	hsa-let-7f-5p
P02755_Methylmalonyl_pathway	Pathways	hsa-miR-455-5p	hsa-miR-378a-3p	hsa-miR-26b-5p	hsa-miR-615-3p	hsa-miR-155-5p	hsa-let-7b-5p
hsa00480_Glutathione_metabolism	Pathways	hsa-let-7g-5p	hsa-miR-26a-5p	hsa-miR-197-3p	hsa-miR-425-5p	hsa-miR-149-5p	hsa-miR-1-3p	hsa-let-7a-5p	hsa-miR-30a-5p	hsa-miR-100-5p	hsa-miR-96-5p	hsa-miR-877-3p	hsa-miR-16-5p	hsa-miR-15b-5p	hsa-miR-24-3p	hsa-miR-185-5p	hsa-miR-744-5p	hsa-miR-193b-3p	hsa-let-7e-5p	hsa-miR-26b-5p	hsa-miR-484	hsa-miR-15a-5p	hsa-miR-331-3p	hsa-miR-196a-5p	hsa-miR-142-3p	hsa-miR-92a-3p	hsa-miR-324-3p	hsa-miR-122-5p	hsa-miR-346	hsa-miR-7-5p	hsa-miR-652-3p	hsa-miR-125a-5p	hsa-miR-34a-5p	hsa-miR-186-5p	hsa-miR-455-3p	hsa-miR-423-5p	hsa-miR-342-3p	hsa-miR-1226-3p	hsa-let-7b-5p	hsa-miR-181a-5p	hsa-miR-17-3p	hsa-let-7i-5p	hsa-miR-339-5p	hsa-miR-133a-3p	hsa-miR-92b-3p	hsa-miR-124-3p	hsa-miR-183-5p	hsa-miR-340-3p	hsa-miR-192-5p
hsa03018_RNA_degradation	Pathways	hsa-miR-125b-5p	hsa-miR-125a-5p	hsa-miR-130b-3p	hsa-miR-96-5p	hsa-miR-877-3p	hsa-miR-33a-5p	hsa-miR-15a-3p	hsa-miR-214-3p	hsa-miR-22-3p	hsa-miR-760	hsa-miR-484	hsa-miR-615-3p	hsa-miR-196a-5p	hsa-miR-185-3p	hsa-miR-92a-3p	hsa-miR-342-3p	hsa-miR-324-5p	hsa-miR-766-3p	hsa-miR-181d-5p	hsa-miR-98-5p	hsa-miR-32-5p	hsa-miR-124-3p	hsa-miR-106b-5p	hsa-miR-744-5p	hsa-miR-18a-3p	hsa-miR-3177-3p	hsa-miR-30a-3p	hsa-miR-30a-5p	hsa-miR-15b-5p	hsa-miR-7-5p	hsa-miR-1260b	hsa-miR-421	hsa-miR-324-3p	hsa-miR-93-5p	hsa-miR-652-3p	hsa-miR-148b-3p	hsa-miR-221-3p	hsa-miR-19b-3p	hsa-miR-365a-3p	hsa-miR-373-3p	hsa-miR-769-5p	hsa-miR-423-3p	hsa-miR-320c	hsa-miR-335-5p	hsa-miR-320a	hsa-miR-26b-5p	hsa-miR-204-5p	hsa-miR-30c-5p
hsa04120_Ubiquitin_mediated_proteolysis	Pathways	hsa-miR-125b-5p	hsa-miR-210-3p	hsa-miR-125a-5p	hsa-miR-1226-3p	hsa-miR-96-5p	hsa-miR-218-5p	hsa-miR-877-3p	hsa-miR-143-3p	hsa-miR-671-5p	hsa-miR-26b-5p	hsa-miR-484	hsa-miR-615-3p	hsa-miR-196a-5p	hsa-miR-188-5p	hsa-miR-1180-3p	hsa-miR-92a-3p	hsa-miR-182-5p	hsa-miR-324-5p	hsa-miR-140-3p	hsa-miR-338-3p	hsa-miR-766-3p	hsa-miR-421	hsa-miR-423-5p	hsa-miR-181d-5p	hsa-miR-1296-5p	hsa-miR-98-5p	hsa-miR-7-1-3p	hsa-let-7i-5p	hsa-miR-10b-5p	hsa-miR-92b-3p	hsa-miR-32-5p	hsa-miR-124-3p	hsa-miR-106b-5p	hsa-miR-1303	hsa-miR-744-5p	hsa-miR-101-3p	hsa-miR-151a-3p	hsa-miR-200c-3p	hsa-miR-18a-3p	hsa-miR-328-3p	hsa-miR-130b-5p	hsa-miR-30c-5p	hsa-miR-30a-5p	hsa-miR-455-3p	hsa-miR-151a-5p	hsa-miR-4326	hsa-miR-15b-5p	hsa-miR-99a-5p
P04380_Cortocotropin_releasing_factor_receptor_signaling_pathway	Pathways	hsa-miR-1-3p	hsa-miR-130b-3p	hsa-miR-30a-5p	hsa-miR-100-5p	hsa-let-7e-5p	hsa-miR-148a-3p	hsa-miR-99a-5p	hsa-miR-7-5p	hsa-miR-155-5p	hsa-miR-193b-3p	hsa-miR-16-5p	hsa-miR-26b-5p	hsa-miR-484	hsa-miR-331-3p	hsa-miR-505-3p	hsa-miR-142-3p	hsa-miR-92a-3p	hsa-miR-93-5p	hsa-miR-324-5p	hsa-miR-21-5p	hsa-miR-29c-3p	hsa-miR-10a-5p	hsa-miR-34a-5p	hsa-miR-186-5p	hsa-miR-423-5p	hsa-miR-19b-3p	hsa-miR-17-5p	hsa-let-7b-5p	hsa-miR-98-5p	hsa-miR-128-3p	hsa-miR-92b-3p	hsa-miR-488-3p	hsa-miR-124-3p	hsa-miR-589-3p	hsa-miR-27b-3p	hsa-miR-27a-3p	hsa-miR-744-5p	hsa-miR-101-3p	hsa-miR-23a-3p	hsa-miR-335-5p	hsa-miR-425-5p	hsa-miR-375	hsa-miR-106a-5p	hsa-miR-103a-3p
P04376_5HT4_type_receptor_mediated_signaling_pathway	Pathways	hsa-miR-1-3p	hsa-miR-130b-3p	hsa-miR-30a-5p	hsa-miR-100-5p	hsa-let-7e-5p	hsa-miR-148a-3p	hsa-miR-99a-5p	hsa-miR-7-5p	hsa-miR-155-5p	hsa-miR-193b-3p	hsa-miR-16-5p	hsa-miR-26b-5p	hsa-miR-484	hsa-miR-331-3p	hsa-miR-505-3p	hsa-miR-92a-3p	hsa-miR-93-5p	hsa-miR-324-5p	hsa-miR-21-5p	hsa-miR-29c-3p	hsa-miR-10a-5p	hsa-miR-34a-5p	hsa-miR-186-5p	hsa-miR-423-5p	hsa-miR-19b-3p	hsa-miR-17-5p	hsa-let-7b-5p	hsa-miR-98-5p	hsa-miR-128-3p	hsa-miR-92b-3p	hsa-miR-124-3p	hsa-miR-589-3p	hsa-miR-27b-3p	hsa-miR-27a-3p	hsa-miR-744-5p	hsa-miR-101-3p	hsa-miR-23a-3p	hsa-miR-335-5p	hsa-miR-425-5p	hsa-miR-375	hsa-miR-106a-5p	hsa-miR-103a-3p
P02741_Flavin_biosynthesis	Pathways	hsa-miR-186-5p	hsa-miR-16-5p	hsa-miR-103a-3p
hsa04614_Renin_angiotensin_system	Pathways	hsa-miR-484	hsa-miR-1-3p	hsa-miR-215-5p	hsa-miR-130b-3p	hsa-miR-877-5p	hsa-miR-935	hsa-miR-130a-3p	hsa-miR-24-3p	hsa-miR-222-3p	hsa-miR-155-5p	hsa-let-7e-5p	hsa-miR-26b-5p	hsa-miR-20a-5p	hsa-miR-615-3p	hsa-miR-505-3p	hsa-miR-142-3p	hsa-miR-1296-5p	hsa-miR-122-5p	hsa-miR-30e-3p	hsa-miR-503-5p	hsa-miR-148b-3p	hsa-miR-361-5p	hsa-miR-19b-3p	hsa-miR-17-5p	hsa-miR-16-5p	hsa-miR-124-3p	hsa-miR-802	hsa-miR-192-5p	hsa-miR-30a-5p	hsa-miR-744-5p	hsa-miR-335-5p	hsa-miR-320a	hsa-miR-425-5p	hsa-miR-18a-3p
hsa04612_Antigen_processing_and_presentation	Pathways	hsa-miR-125b-5p	hsa-miR-877-3p	hsa-miR-942-5p	hsa-miR-296-3p	hsa-miR-22-3p	hsa-miR-26b-5p	hsa-miR-484	hsa-miR-615-3p	hsa-miR-196a-5p	hsa-miR-92a-3p	hsa-miR-342-3p	hsa-miR-182-5p	hsa-miR-324-5p	hsa-miR-140-3p	hsa-miR-3943	hsa-miR-501-5p	hsa-miR-181d-5p	hsa-miR-324-3p	hsa-miR-30d-5p	hsa-miR-10b-5p	hsa-miR-92b-3p	hsa-miR-124-3p	hsa-miR-106b-5p	hsa-miR-744-5p	hsa-miR-18a-3p	hsa-miR-328-3p	hsa-miR-130b-5p	hsa-miR-30c-5p	hsa-miR-30a-5p	hsa-miR-455-3p	hsa-miR-33a-5p	hsa-miR-151a-5p	hsa-miR-148a-3p	hsa-miR-15b-5p	hsa-miR-7-5p	hsa-miR-26a-5p	hsa-miR-15a-5p	hsa-miR-421	hsa-miR-1296-5p	hsa-miR-93-5p	hsa-miR-326	hsa-miR-652-3p	hsa-miR-148b-3p	hsa-miR-221-3p	hsa-miR-760	hsa-miR-146a-5p	hsa-miR-940	hsa-miR-423-3p
WP391_Mitochondrial_Gene_Expression	Pathways	hsa-miR-18a-5p	hsa-miR-203a-3p	hsa-miR-26a-5p	hsa-miR-125b-5p	hsa-miR-99b-5p	hsa-miR-149-5p	hsa-miR-1-3p	hsa-miR-215-5p	hsa-miR-30a-5p	hsa-miR-218-5p	hsa-miR-15a-3p	hsa-miR-16-5p	hsa-miR-296-3p	hsa-miR-222-3p	hsa-miR-22-3p	hsa-miR-193b-3p	hsa-miR-26b-5p	hsa-miR-484	hsa-miR-615-3p	hsa-miR-30b-5p	hsa-miR-92a-3p	hsa-miR-1296-5p	hsa-miR-122-5p	hsa-miR-182-5p	hsa-miR-21-5p	hsa-miR-137	hsa-miR-200b-3p	hsa-miR-10a-5p	hsa-miR-125a-5p	hsa-miR-3687	hsa-miR-34a-5p	hsa-miR-145-5p	hsa-miR-186-5p	hsa-miR-7-5p	hsa-miR-30e-5p	hsa-let-7a-5p	hsa-let-7b-5p	hsa-miR-625-5p	hsa-miR-98-5p	hsa-miR-29b-3p	hsa-miR-378a-5p	hsa-miR-23b-3p	hsa-miR-133a-3p	hsa-miR-423-3p	hsa-miR-124-3p	hsa-miR-183-5p	hsa-miR-192-5p	hsa-miR-34b-5p
hsa04260_Cardiac_muscle_contraction	Pathways	hsa-miR-18a-5p	hsa-miR-125b-5p	hsa-miR-26a-5p	hsa-miR-197-3p	hsa-miR-671-5p	hsa-miR-339-5p	hsa-miR-130b-5p	hsa-miR-125a-5p	hsa-miR-18b-5p	hsa-miR-1-3p	hsa-miR-215-5p	hsa-miR-1226-3p	hsa-miR-30a-5p	hsa-miR-100-5p	hsa-miR-106b-3p	hsa-let-7b-5p	hsa-miR-25-3p	hsa-miR-31-5p	hsa-miR-16-5p	hsa-miR-148a-3p	hsa-miR-28-5p	hsa-miR-15b-5p	hsa-miR-340-5p	hsa-miR-7-5p	hsa-miR-93-5p	hsa-miR-193b-3p	hsa-miR-1296-5p	hsa-miR-26b-5p	hsa-miR-484	hsa-miR-148b-3p	hsa-miR-615-3p	hsa-miR-331-3p	hsa-miR-93-3p	hsa-miR-196a-5p	hsa-miR-548b-3p	hsa-miR-142-3p	hsa-miR-92a-3p	hsa-miR-324-3p	hsa-miR-122-5p	hsa-miR-92b-5p	hsa-miR-320b	hsa-miR-21-5p	hsa-let-7d-5p	hsa-miR-99a-5p	hsa-miR-10a-5p	hsa-miR-34a-5p	hsa-miR-421	hsa-miR-145-5p
hsa00350_Tyrosine_metabolism	Pathways	hsa-miR-132-3p	hsa-miR-9-5p	hsa-miR-1-3p	hsa-miR-215-5p	hsa-miR-30a-5p	hsa-miR-16-5p	hsa-miR-7-5p	hsa-miR-22-3p	hsa-miR-744-5p	hsa-miR-26b-5p	hsa-miR-484	hsa-miR-93-3p	hsa-miR-196a-5p	hsa-miR-92a-3p	hsa-miR-342-3p	hsa-miR-93-5p	hsa-miR-148b-3p	hsa-miR-34a-5p	hsa-miR-145-5p	hsa-miR-186-5p	hsa-miR-24-3p	hsa-let-7d-5p	hsa-let-7a-5p	hsa-let-7b-5p	hsa-miR-181a-5p	hsa-miR-423-3p	hsa-miR-769-5p	hsa-miR-17-3p	hsa-miR-124-3p	hsa-miR-106b-5p	hsa-miR-451a	hsa-miR-192-5p	hsa-miR-155-5p	hsa-miR-335-5p	hsa-miR-320a	hsa-miR-375
hsa04666_Fc_gamma_R_mediated_phagocytosis	Pathways	hsa-miR-125b-5p	hsa-miR-125a-5p	hsa-miR-1226-3p	hsa-miR-96-5p	hsa-miR-877-3p	hsa-miR-143-3p	hsa-miR-149-3p	hsa-miR-296-3p	hsa-miR-1914-3p	hsa-miR-373-3p	hsa-miR-324-3p	hsa-miR-26b-5p	hsa-miR-484	hsa-miR-615-3p	hsa-miR-497-5p	hsa-miR-92a-3p	hsa-miR-342-3p	hsa-miR-324-5p	hsa-miR-1224-5p	hsa-miR-24-2-5p	hsa-miR-338-3p	hsa-miR-766-3p	hsa-miR-423-5p	hsa-miR-199a-3p	hsa-miR-98-5p	hsa-let-7i-5p	hsa-miR-92b-3p	hsa-miR-32-5p	hsa-miR-124-3p	hsa-miR-106b-5p	hsa-miR-129-1-3p	hsa-miR-744-5p	hsa-miR-101-3p	hsa-miR-18a-3p	hsa-miR-328-3p	hsa-miR-302c-3p	hsa-miR-25-3p	hsa-miR-30a-5p	hsa-miR-326	hsa-miR-15b-5p	hsa-miR-7-5p	hsa-miR-1260b	hsa-miR-26a-5p	hsa-miR-15a-5p	hsa-miR-429	hsa-miR-1296-5p	hsa-miR-93-5p	hsa-miR-29a-3p
hsa00531_Glycosaminoglycan_degradation	Pathways	hsa-miR-9-5p	hsa-miR-25-3p	hsa-miR-30a-3p	hsa-miR-16-5p	hsa-miR-1258	hsa-miR-26b-5p	hsa-miR-484	hsa-miR-615-3p	hsa-miR-92a-3p	hsa-miR-342-3p	hsa-miR-122-5p	hsa-miR-21-5p	hsa-miR-30e-3p	hsa-let-7b-5p	hsa-miR-181a-5p	hsa-miR-941	hsa-miR-23b-3p	hsa-miR-192-5p	hsa-miR-107	hsa-miR-155-5p	hsa-miR-335-5p	hsa-miR-224-5p	hsa-miR-760	hsa-miR-103a-3p
P00025_Hedgehog_signaling_pathway	Pathways	hsa-miR-125b-5p	hsa-miR-484	hsa-miR-197-3p	hsa-miR-149-5p	hsa-miR-215-5p	hsa-miR-30c-5p	hsa-miR-877-5p	hsa-miR-100-5p	hsa-miR-96-5p	hsa-miR-204-5p	hsa-miR-877-3p	hsa-let-7e-5p	hsa-miR-25-3p	hsa-miR-590-3p	hsa-miR-93-3p	hsa-miR-193b-3p	hsa-miR-16-5p	hsa-miR-1260b	hsa-miR-26a-5p	hsa-miR-1301-3p	hsa-miR-15a-5p	hsa-miR-935	hsa-miR-331-3p	hsa-miR-10a-5p	hsa-miR-196a-5p	hsa-miR-92a-3p	hsa-miR-324-3p	hsa-miR-93-5p	hsa-miR-324-5p	hsa-miR-378a-5p	hsa-miR-21-5p	hsa-miR-326	hsa-miR-652-3p	hsa-miR-148b-3p	hsa-miR-338-3p	hsa-miR-186-5p	hsa-miR-1296-5p	hsa-let-7b-5p	hsa-miR-769-3p	hsa-miR-769-5p	hsa-miR-450a-5p	hsa-miR-378a-3p	hsa-miR-124-3p	hsa-miR-183-5p	hsa-miR-192-5p	hsa-miR-155-5p	hsa-miR-335-5p	hsa-miR-320a
hsa00232_Caffeine_metabolism	Pathways	hsa-miR-25-3p	hsa-let-7b-5p	hsa-miR-26b-5p
WP272_Blood_Clotting_Cascade	Pathways	hsa-miR-9-5p	hsa-miR-1-3p	hsa-miR-215-5p	hsa-miR-30c-5p	hsa-miR-143-3p	hsa-miR-99a-5p	hsa-miR-193b-3p	hsa-miR-16-5p	hsa-miR-26b-5p	hsa-miR-204-5p	hsa-miR-29a-3p	hsa-miR-409-3p	hsa-miR-21-5p	hsa-miR-29c-3p	hsa-miR-301a-3p	hsa-miR-145-5p	hsa-let-7b-5p	hsa-miR-144-3p	hsa-miR-29b-3p	hsa-miR-23b-3p	hsa-miR-124-3p	hsa-miR-138-5p	hsa-miR-192-5p	hsa-miR-155-5p	hsa-miR-335-5p
WP2064_Neural_Crest_Differentiation	Pathways	hsa-miR-125b-5p	hsa-miR-210-3p	hsa-miR-150-5p	hsa-miR-19b-1-5p	hsa-miR-524-5p	hsa-miR-1226-3p	hsa-miR-9-3p	hsa-miR-877-3p	hsa-miR-214-3p	hsa-miR-296-3p	hsa-miR-34c-5p	hsa-miR-26b-5p	hsa-miR-484	hsa-miR-204-5p	hsa-miR-196a-5p	hsa-miR-92a-3p	hsa-miR-182-5p	hsa-miR-324-5p	hsa-miR-320b	hsa-miR-218-5p	hsa-miR-520h	hsa-miR-532-3p	hsa-miR-423-5p	hsa-miR-30d-5p	hsa-miR-144-3p	hsa-miR-98-5p	hsa-miR-124-3p	hsa-miR-27b-5p	hsa-miR-181c-5p	hsa-miR-199b-5p	hsa-miR-744-5p	hsa-miR-101-3p	hsa-miR-200c-3p	hsa-miR-18a-3p	hsa-miR-10b-5p	hsa-miR-545-3p	hsa-miR-130b-5p	hsa-miR-30c-5p	hsa-miR-30a-5p	hsa-miR-326	hsa-miR-199a-5p	hsa-miR-99a-5p	hsa-miR-129-5p	hsa-miR-24-3p	hsa-miR-146b-5p	hsa-miR-26a-5p	hsa-miR-15a-5p	hsa-miR-429
hsa04621_NOD_like_receptor_signaling_pathway	Pathways	hsa-miR-125b-5p	hsa-miR-210-3p	hsa-miR-19b-1-5p	hsa-let-7a-5p	hsa-miR-96-5p	hsa-miR-218-5p	hsa-miR-877-3p	hsa-miR-33a-5p	hsa-miR-214-3p	hsa-miR-296-3p	hsa-miR-373-3p	hsa-miR-26b-5p	hsa-miR-484	hsa-miR-615-3p	hsa-miR-196a-5p	hsa-miR-92a-3p	hsa-miR-324-5p	hsa-miR-140-3p	hsa-miR-3943	hsa-miR-501-5p	hsa-miR-766-3p	hsa-miR-181d-5p	hsa-miR-199a-3p	hsa-miR-30d-5p	hsa-miR-98-5p	hsa-miR-92b-3p	hsa-miR-32-5p	hsa-miR-124-3p	hsa-miR-106b-5p	hsa-miR-101-3p	hsa-miR-200c-3p	hsa-miR-125a-5p	hsa-miR-30c-5p	hsa-miR-30a-5p	hsa-miR-455-3p	hsa-miR-148a-3p	hsa-miR-15b-5p	hsa-miR-24-3p	hsa-miR-26a-5p	hsa-miR-15a-5p	hsa-miR-429	hsa-miR-421	hsa-miR-324-3p	hsa-miR-93-5p	hsa-miR-29a-3p	hsa-miR-335-5p	hsa-miR-30e-3p	hsa-miR-148b-3p
hsa03320_PPAR_signaling_pathway	Pathways	hsa-miR-132-3p	hsa-miR-18a-5p	hsa-miR-197-3p	hsa-miR-1229-3p	hsa-miR-125a-5p	hsa-miR-346	hsa-miR-1-3p	hsa-miR-215-5p	hsa-miR-130b-3p	hsa-miR-30a-5p	hsa-miR-100-5p	hsa-miR-455-3p	hsa-miR-10b-5p	hsa-miR-141-3p	hsa-miR-30d-5p	hsa-miR-877-3p	hsa-miR-191-5p	hsa-miR-16-5p	hsa-miR-769-3p	hsa-miR-340-5p	hsa-miR-24-3p	hsa-miR-222-3p	hsa-miR-22-3p	hsa-miR-744-5p	hsa-miR-130a-3p	hsa-miR-26b-5p	hsa-miR-484	hsa-miR-148b-3p	hsa-miR-615-3p	hsa-miR-331-3p	hsa-miR-519d-3p	hsa-miR-93-3p	hsa-miR-500a-3p	hsa-miR-296-3p	hsa-miR-92a-3p	hsa-miR-324-5p	hsa-miR-122-5p	hsa-miR-324-3p	hsa-miR-29a-3p	hsa-miR-185-5p	hsa-miR-769-5p	hsa-miR-21-5p	hsa-miR-1260b	hsa-miR-369-5p	hsa-miR-140-3p	hsa-miR-10a-5p	hsa-miR-149-5p	hsa-miR-34a-5p
WP481_Insulin_Signaling	Pathways	hsa-miR-125b-5p	hsa-miR-210-3p	hsa-miR-125a-5p	hsa-miR-130b-3p	hsa-miR-96-5p	hsa-miR-218-5p	hsa-miR-877-3p	hsa-miR-33a-5p	hsa-miR-143-3p	hsa-miR-214-3p	hsa-miR-149-3p	hsa-miR-296-3p	hsa-miR-22-3p	hsa-miR-324-3p	hsa-miR-26b-5p	hsa-miR-484	hsa-miR-615-3p	hsa-miR-497-5p	hsa-miR-196a-5p	hsa-miR-1229-3p	hsa-miR-92a-3p	hsa-miR-342-3p	hsa-miR-182-5p	hsa-miR-324-5p	hsa-miR-520b	hsa-miR-24-2-5p	hsa-miR-766-3p	hsa-miR-421	hsa-miR-423-5p	hsa-miR-181d-5p	hsa-miR-199a-3p	hsa-miR-519c-3p	hsa-miR-144-3p	hsa-miR-98-5p	hsa-let-7i-5p	hsa-miR-92b-3p	hsa-miR-32-5p	hsa-miR-124-3p	hsa-miR-106b-5p	hsa-miR-129-1-3p	hsa-miR-744-5p	hsa-miR-101-3p	hsa-miR-151a-3p	hsa-miR-503-5p	hsa-miR-200c-3p	hsa-miR-18a-3p	hsa-miR-223-3p	hsa-miR-302c-3p
hsa04916_Melanogenesis	Pathways	hsa-miR-125b-5p	hsa-miR-150-5p	hsa-miR-199a-3p	hsa-miR-24-2-5p	hsa-let-7a-5p	hsa-miR-96-5p	hsa-miR-877-3p	hsa-miR-143-3p	hsa-miR-214-3p	hsa-miR-22-3p	hsa-miR-26b-5p	hsa-miR-484	hsa-miR-615-3p	hsa-miR-497-5p	hsa-miR-92a-3p	hsa-miR-182-5p	hsa-miR-324-5p	hsa-miR-532-3p	hsa-miR-219a-5p	hsa-miR-766-3p	hsa-miR-423-5p	hsa-miR-181d-5p	hsa-miR-1296-5p	hsa-miR-30d-5p	hsa-miR-98-5p	hsa-miR-92b-3p	hsa-miR-124-3p	hsa-miR-181c-5p	hsa-miR-744-5p	hsa-miR-101-3p	hsa-miR-374a-5p	hsa-miR-200c-3p	hsa-miR-18a-3p	hsa-miR-130b-5p	hsa-miR-30a-3p	hsa-miR-877-5p	hsa-miR-15b-5p	hsa-miR-99a-5p	hsa-miR-7-5p	hsa-miR-26a-5p	hsa-miR-15a-5p	hsa-miR-429	hsa-miR-622	hsa-miR-324-3p	hsa-miR-93-5p	hsa-miR-126-3p	hsa-miR-137	hsa-miR-148b-3p
hsa03030_DNA_replication	Pathways	hsa-miR-18a-5p	hsa-miR-125b-5p	hsa-miR-20a-5p	hsa-miR-197-3p	hsa-miR-1229-3p	hsa-miR-130b-5p	hsa-miR-149-5p	hsa-miR-1-3p	hsa-miR-215-5p	hsa-miR-31-3p	hsa-miR-1914-5p	hsa-miR-328-3p	hsa-miR-25-3p	hsa-miR-31-5p	hsa-let-7e-5p	hsa-miR-24-3p	hsa-miR-222-3p	hsa-miR-155-5p	hsa-miR-193b-3p	hsa-miR-16-5p	hsa-miR-1260b	hsa-miR-484	hsa-miR-1301-3p	hsa-miR-15a-5p	hsa-miR-615-3p	hsa-miR-885-5p	hsa-miR-93-3p	hsa-miR-196a-5p	hsa-miR-1180-3p	hsa-miR-92a-3p	hsa-miR-1296-5p	hsa-miR-93-5p	hsa-miR-29a-3p	hsa-miR-324-5p	hsa-miR-503-5p	hsa-miR-34a-5p	hsa-miR-186-5p	hsa-miR-7-5p	hsa-miR-19b-3p	hsa-miR-324-3p	hsa-miR-1226-3p	hsa-let-7b-5p	hsa-miR-331-3p	hsa-miR-501-3p	hsa-miR-339-5p	hsa-miR-423-3p	hsa-miR-124-3p	hsa-miR-183-5p
WP1991_SRF_and_miRs_in_Smooth_Muscle_Differentiation_and_Proliferation	Pathways	hsa-miR-132-3p	hsa-miR-484	hsa-miR-17-5p	hsa-miR-302d-3p	hsa-miR-1-3p	hsa-miR-30a-3p	hsa-miR-877-5p	hsa-miR-10b-5p	hsa-miR-877-3p	hsa-miR-16-5p	hsa-miR-25-3p	hsa-miR-99a-5p	hsa-miR-7-5p	hsa-miR-130a-3p	hsa-miR-26b-5p	hsa-miR-26a-5p	hsa-miR-15a-5p	hsa-miR-615-3p	hsa-miR-331-3p	hsa-miR-196a-5p	hsa-miR-30b-5p	hsa-miR-302b-3p	hsa-miR-92a-3p	hsa-miR-342-3p	hsa-miR-122-5p	hsa-miR-182-5p	hsa-miR-324-5p	hsa-miR-21-5p	hsa-miR-137	hsa-miR-135b-5p	hsa-miR-19b-3p	hsa-miR-145-5p	hsa-miR-186-5p	hsa-miR-423-5p	hsa-miR-301a-3p	hsa-miR-324-3p	hsa-let-7a-5p	hsa-let-7b-5p	hsa-miR-128-3p	hsa-miR-378a-3p	hsa-miR-124-3p	hsa-miR-106b-5p	hsa-miR-20a-5p	hsa-let-7c-5p	hsa-miR-107	hsa-miR-155-5p	hsa-miR-335-5p	hsa-miR-320a
hsa04370_VEGF_signaling_pathway	Pathways	hsa-miR-125b-5p	hsa-miR-3934-5p	hsa-miR-150-5p	hsa-miR-19b-1-5p	hsa-miR-96-5p	hsa-miR-877-3p	hsa-miR-33a-5p	hsa-miR-143-3p	hsa-miR-149-3p	hsa-miR-296-3p	hsa-miR-1914-3p	hsa-miR-373-3p	hsa-miR-324-3p	hsa-miR-26b-5p	hsa-miR-484	hsa-miR-615-3p	hsa-miR-497-5p	hsa-miR-361-3p	hsa-miR-1229-3p	hsa-miR-92a-3p	hsa-miR-324-5p	hsa-miR-24-2-5p	hsa-miR-532-3p	hsa-miR-766-3p	hsa-miR-520g-3p	hsa-miR-181d-5p	hsa-miR-199a-3p	hsa-miR-98-5p	hsa-miR-92b-3p	hsa-miR-124-3p	hsa-miR-106b-5p	hsa-miR-181c-5p	hsa-miR-744-5p	hsa-miR-101-3p	hsa-miR-134-5p	hsa-miR-503-5p	hsa-miR-200c-3p	hsa-miR-18a-3p	hsa-miR-193a-3p	hsa-miR-125a-5p	hsa-miR-302c-3p	hsa-miR-383-5p	hsa-miR-30a-5p	hsa-miR-15b-5p	hsa-miR-99a-5p	hsa-miR-7-5p	hsa-miR-26a-5p	hsa-miR-15a-5p
WP241_One_Carbon_Metabolism	Pathways	hsa-miR-125b-5p	hsa-miR-484	hsa-miR-1180-3p	hsa-miR-152-3p	hsa-miR-887-3p	hsa-miR-149-5p	hsa-miR-1-3p	hsa-miR-877-5p	hsa-miR-100-5p	hsa-miR-615-3p	hsa-miR-30d-5p	hsa-miR-877-3p	hsa-miR-369-5p	hsa-miR-143-3p	hsa-miR-148a-3p	hsa-miR-15b-5p	hsa-miR-99a-5p	hsa-miR-24-3p	hsa-miR-185-5p	hsa-miR-744-5p	hsa-miR-193b-3p	hsa-miR-16-5p	hsa-miR-1260b	hsa-miR-26a-5p	hsa-miR-935	hsa-miR-93-3p	hsa-miR-30b-5p	hsa-miR-10a-5p	hsa-miR-92a-3p	hsa-miR-342-3p	hsa-miR-93-5p	hsa-miR-29a-3p	hsa-miR-324-5p	hsa-miR-29c-3p	hsa-miR-320a	hsa-miR-148b-3p	hsa-miR-19b-3p	hsa-miR-140-5p	hsa-miR-186-5p	hsa-miR-194-5p	hsa-miR-423-3p	hsa-miR-34a-5p	hsa-miR-30e-5p	hsa-let-7a-5p	hsa-let-7b-5p	hsa-miR-940	hsa-miR-29b-3p	hsa-miR-769-5p
WP545_Complement_Activation_Classical_Pathway	Pathways	hsa-miR-132-3p	hsa-miR-124-3p	hsa-miR-10a-5p	hsa-miR-26b-5p	hsa-miR-193b-3p	hsa-miR-335-5p	hsa-miR-142-3p	hsa-let-7a-5p	hsa-miR-181a-5p	hsa-miR-16-5p	hsa-miR-98-5p
WP111_Electron_Transport_Chain	Pathways	hsa-miR-125b-5p	hsa-miR-125a-5p	hsa-miR-1226-3p	hsa-miR-877-3p	hsa-miR-3181	hsa-miR-26b-5p	hsa-miR-484	hsa-miR-615-3p	hsa-miR-196a-5p	hsa-miR-92a-3p	hsa-miR-182-5p	hsa-miR-324-5p	hsa-miR-505-5p	hsa-miR-423-5p	hsa-miR-324-3p	hsa-miR-92b-3p	hsa-miR-130b-3p	hsa-miR-106b-5p	hsa-miR-3198	hsa-miR-744-5p	hsa-miR-101-3p	hsa-miR-18a-3p	hsa-miR-328-3p	hsa-miR-125b-2-3p	hsa-miR-130b-5p	hsa-miR-877-5p	hsa-miR-455-3p	hsa-miR-151a-5p	hsa-miR-148a-3p	hsa-miR-99a-5p	hsa-miR-24-3p	hsa-miR-1260b	hsa-miR-26a-5p	hsa-miR-15a-5p	hsa-miR-147b	hsa-miR-421	hsa-miR-1296-5p	hsa-miR-93-5p	hsa-miR-652-3p	hsa-miR-148b-3p	hsa-miR-221-3p	hsa-miR-940	hsa-miR-23b-3p	hsa-miR-629-3p	hsa-miR-339-3p	hsa-miR-320b	hsa-miR-320a	hsa-miR-760
P02730_Asparagine_and_aspartate_biosynthesis	Pathways	hsa-miR-769-5p	hsa-miR-17-3p	hsa-miR-93-3p	hsa-miR-183-5p	hsa-miR-484	hsa-miR-615-3p	hsa-miR-155-5p	hsa-miR-196a-5p	hsa-miR-23a-3p	hsa-miR-335-5p	hsa-miR-17-5p	hsa-miR-92a-3p	hsa-miR-342-3p	hsa-miR-16-5p	hsa-miR-26b-5p
WP530_Cytokines_and_Inflammatory_Response	Pathways	hsa-miR-203a-3p	hsa-let-7g-5p	hsa-miR-484	hsa-miR-192-5p	hsa-miR-1-3p	hsa-miR-215-5p	hsa-miR-130b-3p	hsa-miR-30c-5p	hsa-miR-191-5p	hsa-miR-16-5p	hsa-miR-379-5p	hsa-miR-15b-5p	hsa-miR-24-3p	hsa-miR-365a-3p	hsa-miR-744-5p	hsa-miR-130a-3p	hsa-miR-26b-5p	hsa-miR-26a-5p	hsa-miR-15a-5p	hsa-miR-204-5p	hsa-miR-505-3p	hsa-miR-30b-5p	hsa-miR-409-3p	hsa-miR-21-5p	hsa-miR-211-5p	hsa-miR-148b-3p	hsa-miR-34a-5p	hsa-miR-145-5p	hsa-let-7d-5p	hsa-let-7a-5p	hsa-let-7b-5p	hsa-miR-98-5p	hsa-miR-29b-3p	hsa-let-7i-5p	hsa-miR-124-3p	hsa-miR-181c-5p	hsa-let-7f-5p	hsa-miR-155-5p	hsa-miR-633	hsa-miR-335-5p	hsa-miR-454-5p	hsa-miR-106a-5p
WP477_Cytoplasmic_Ribosomal_Proteins	Pathways	hsa-miR-125b-5p	hsa-miR-378c	hsa-miR-125a-5p	hsa-miR-193a-5p	hsa-miR-1226-3p	hsa-miR-96-5p	hsa-miR-218-5p	hsa-miR-877-3p	hsa-miR-33a-5p	hsa-miR-18a-5p	hsa-miR-296-3p	hsa-miR-22-3p	hsa-miR-324-3p	hsa-miR-26b-5p	hsa-miR-484	hsa-miR-3188	hsa-miR-204-5p	hsa-miR-196a-5p	hsa-miR-98-5p	hsa-miR-1180-3p	hsa-miR-92a-3p	hsa-miR-342-3p	hsa-miR-182-5p	hsa-miR-324-5p	hsa-miR-140-3p	hsa-miR-3943	hsa-miR-501-5p	hsa-miR-766-3p	hsa-miR-421	hsa-miR-423-5p	hsa-miR-181d-5p	hsa-miR-221-5p	hsa-miR-30d-5p	hsa-miR-361-3p	hsa-miR-10b-5p	hsa-miR-92b-3p	hsa-miR-32-5p	hsa-miR-1303	hsa-miR-106b-5p	hsa-miR-124-3p	hsa-miR-744-5p	hsa-miR-503-5p	hsa-miR-18a-3p	hsa-miR-422a	hsa-miR-328-3p	hsa-miR-139-5p	hsa-miR-1237-3p	hsa-miR-130b-5p
hsa00280_Valine_leucine_and_isoleucine_degradation	Pathways	hsa-miR-18a-5p	hsa-miR-9-5p	hsa-miR-497-5p	hsa-miR-1229-3p	hsa-miR-152-3p	hsa-miR-130b-5p	hsa-miR-1-3p	hsa-miR-215-5p	hsa-let-7a-5p	hsa-miR-877-5p	hsa-miR-100-5p	hsa-miR-96-5p	hsa-miR-328-3p	hsa-miR-877-3p	hsa-miR-3176	hsa-miR-16-5p	hsa-miR-15b-5p	hsa-miR-99a-5p	hsa-miR-7-5p	hsa-miR-455-5p	hsa-miR-193b-3p	hsa-let-7e-5p	hsa-miR-26b-5p	hsa-miR-484	hsa-miR-1301-3p	hsa-miR-615-3p	hsa-miR-92a-3p	hsa-miR-324-5p	hsa-miR-21-5p	hsa-miR-29c-3p	hsa-miR-503-5p	hsa-miR-10a-5p	hsa-miR-34a-5p	hsa-miR-186-5p	hsa-miR-19b-3p	hsa-miR-1226-3p	hsa-let-7b-5p	hsa-miR-769-3p	hsa-miR-98-5p	hsa-miR-769-5p	hsa-miR-23b-3p	hsa-miR-128-3p	hsa-miR-378a-3p	hsa-miR-32-5p	hsa-miR-124-3p	hsa-miR-106b-5p	hsa-miR-183-5p	hsa-miR-192-5p
hsa00730_Thiamine_metabolism	Pathways	hsa-miR-15b-5p	hsa-miR-222-3p	hsa-miR-197-3p	hsa-miR-124-3p	hsa-miR-106b-5p	hsa-miR-34a-5p	hsa-miR-877-5p	hsa-miR-181a-5p	hsa-miR-122-5p
hsa00910_Nitrogen_metabolism	Pathways	hsa-miR-132-3p	hsa-miR-18a-5p	hsa-miR-484	hsa-miR-99b-3p	hsa-miR-9-5p	hsa-miR-149-5p	hsa-miR-1-3p	hsa-miR-215-5p	hsa-let-7a-5p	hsa-miR-877-5p	hsa-miR-877-3p	hsa-miR-16-5p	hsa-miR-99a-5p	hsa-miR-7-5p	hsa-miR-185-5p	hsa-miR-193b-3p	hsa-let-7e-5p	hsa-miR-26b-5p	hsa-miR-26a-5p	hsa-miR-615-3p	hsa-miR-93-3p	hsa-miR-196a-5p	hsa-miR-142-3p	hsa-miR-92a-3p	hsa-miR-29a-3p	hsa-miR-320b	hsa-miR-296-3p	hsa-miR-19b-3p	hsa-miR-937-3p	hsa-miR-186-5p	hsa-miR-24-3p	hsa-miR-17-5p	hsa-miR-1226-3p	hsa-let-7b-5p	hsa-miR-98-5p	hsa-miR-124-3p	hsa-miR-183-5p	hsa-miR-192-5p	hsa-miR-155-5p	hsa-miR-423-5p	hsa-miR-23a-3p	hsa-miR-335-5p	hsa-miR-320a	hsa-miR-374b-5p	hsa-miR-125a-3p	hsa-let-7f-5p	hsa-miR-103a-3p
P02740_De_novo_pyrimidine_ribonucleotides_biosythesis	Pathways	hsa-miR-125b-5p	hsa-miR-197-3p	hsa-miR-1229-3p	hsa-miR-125a-5p	hsa-miR-1-3p	hsa-miR-455-3p	hsa-miR-192-5p	hsa-miR-26b-5p	hsa-miR-484	hsa-miR-615-3p	hsa-miR-331-3p	hsa-miR-92a-3p	hsa-miR-122-5p	hsa-miR-324-5p	hsa-miR-505-5p	hsa-miR-301a-3p	hsa-miR-186-5p	hsa-miR-423-5p	hsa-miR-34a-5p	hsa-miR-17-5p	hsa-let-7b-5p	hsa-miR-3200-3p	hsa-miR-92b-3p	hsa-miR-221-3p	hsa-miR-124-3p	hsa-miR-450b-5p	hsa-miR-3176	hsa-miR-27a-3p	hsa-miR-320a	hsa-miR-1260b
P00021_FGF_signaling_pathway	Pathways	hsa-miR-125b-5p	hsa-miR-146b-5p	hsa-miR-19b-1-5p	hsa-miR-96-5p	hsa-miR-218-5p	hsa-miR-877-3p	hsa-miR-33a-5p	hsa-miR-143-3p	hsa-miR-214-3p	hsa-miR-149-3p	hsa-miR-296-3p	hsa-miR-1914-3p	hsa-miR-22-3p	hsa-miR-324-3p	hsa-miR-26b-5p	hsa-miR-484	hsa-miR-615-3p	hsa-miR-196a-5p	hsa-miR-1229-3p	hsa-miR-92a-3p	hsa-miR-342-3p	hsa-miR-182-5p	hsa-miR-324-5p	hsa-miR-520b	hsa-miR-125a-5p	hsa-miR-766-3p	hsa-miR-505-5p	hsa-miR-423-5p	hsa-miR-181d-5p	hsa-miR-199a-3p	hsa-miR-98-5p	hsa-let-7i-5p	hsa-miR-92b-3p	hsa-miR-32-5p	hsa-miR-124-3p	hsa-miR-106b-5p	hsa-miR-1303	hsa-miR-181c-5p	hsa-miR-744-5p	hsa-miR-101-3p	hsa-miR-503-5p	hsa-miR-200c-3p	hsa-miR-18a-3p	hsa-miR-10b-5p	hsa-miR-302c-3p	hsa-miR-130b-5p	hsa-miR-30a-3p	hsa-miR-30a-5p
WP430_Statin_Pathway	Pathways	hsa-miR-9-5p	hsa-miR-484	hsa-miR-545-3p	hsa-miR-125b-5p	hsa-miR-192-5p	hsa-miR-149-5p	hsa-miR-1-3p	hsa-miR-215-5p	hsa-miR-130b-3p	hsa-miR-30a-5p	hsa-miR-96-5p	hsa-miR-191-5p	hsa-miR-877-3p	hsa-miR-33a-5p	hsa-miR-130a-3p	hsa-miR-25-3p	hsa-miR-185-5p	hsa-miR-93-5p	hsa-miR-744-5p	hsa-miR-193b-3p	hsa-let-7e-5p	hsa-miR-26b-5p	hsa-miR-26a-5p	hsa-miR-615-3p	hsa-miR-19a-3p	hsa-miR-26b-3p	hsa-miR-205-5p	hsa-miR-98-5p	hsa-miR-92a-3p	hsa-miR-122-5p	hsa-miR-29a-3p	hsa-miR-324-5p	hsa-miR-29c-3p	hsa-miR-148b-3p	hsa-miR-19b-3p	hsa-miR-186-5p	hsa-miR-34a-5p	hsa-let-7b-5p	hsa-miR-500a-3p	hsa-miR-338-5p	hsa-miR-128-3p	hsa-miR-92b-3p	hsa-miR-32-5p	hsa-miR-124-3p	hsa-miR-138-5p	hsa-miR-183-5p	hsa-miR-1303	hsa-miR-33b-5p
WP1772_Apoptosis_Modulation_and_Signaling	Pathways	hsa-miR-421	hsa-miR-130b-3p	hsa-miR-93-3p
hsa00983_Drug_metabolism___other_enzymes	Pathways	hsa-miR-197-3p	hsa-miR-192-5p	hsa-miR-1-3p	hsa-miR-215-5p	hsa-miR-25-3p	hsa-miR-1254	hsa-miR-30c-5p	hsa-miR-16-5p	hsa-miR-28-5p	hsa-miR-193b-3p	hsa-let-7e-5p	hsa-miR-26b-5p	hsa-miR-1301-3p	hsa-miR-615-3p	hsa-miR-30b-5p	hsa-miR-142-3p	hsa-miR-92a-3p	hsa-miR-324-3p	hsa-miR-93-5p	hsa-miR-29a-3p	hsa-miR-326	hsa-miR-361-5p	hsa-miR-19b-3p	hsa-miR-34a-5p	hsa-miR-186-3p	hsa-let-7a-5p	hsa-let-7b-5p	hsa-miR-98-5p	hsa-miR-29b-3p	hsa-miR-378a-5p	hsa-miR-23b-3p	hsa-miR-17-3p	hsa-miR-124-3p	hsa-miR-106b-5p	hsa-miR-33b-5p	hsa-miR-27b-3p	hsa-miR-155-5p	hsa-miR-23a-3p	hsa-miR-335-5p	hsa-miR-18a-3p	hsa-miR-760	hsa-miR-103a-3p
P02758_Ornithine_degradation	Pathways	hsa-miR-30d-5p	hsa-miR-193b-3p	hsa-miR-192-5p	hsa-miR-15a-5p	hsa-miR-100-5p	hsa-miR-17-5p	hsa-miR-151a-3p	hsa-miR-324-3p	hsa-miR-30b-5p
hsa04512_ECM_receptor_interaction	Pathways	hsa-miR-125a-5p	hsa-miR-9-3p	hsa-miR-877-3p	hsa-miR-143-3p	hsa-miR-373-3p	hsa-miR-26b-5p	hsa-miR-484	hsa-miR-615-3p	hsa-miR-196a-5p	hsa-miR-92a-3p	hsa-miR-324-5p	hsa-miR-19b-1-5p	hsa-miR-423-5p	hsa-miR-199a-3p	hsa-miR-500a-3p	hsa-miR-98-5p	hsa-miR-32-5p	hsa-miR-124-3p	hsa-miR-106b-5p	hsa-miR-199b-5p	hsa-miR-744-5p	hsa-miR-200c-3p	hsa-miR-18a-3p	hsa-miR-10b-5p	hsa-miR-218-5p	hsa-miR-30c-5p	hsa-miR-30a-5p	hsa-miR-455-3p	hsa-miR-15b-5p	hsa-miR-99a-5p	hsa-miR-7-5p	hsa-miR-93-5p	hsa-miR-29a-3p	hsa-miR-30a-3p	hsa-miR-148b-3p	hsa-miR-194-5p	hsa-miR-663a	hsa-miR-146a-5p	hsa-miR-29b-3p	hsa-miR-769-5p	hsa-miR-133a-3p	hsa-miR-138-5p	hsa-miR-335-5p	hsa-miR-320a	hsa-miR-760	hsa-miR-132-3p	hsa-let-7g-5p	hsa-miR-9-5p
P02736_Coenzyme_A_biosynthesis	Pathways	hsa-miR-10a-5p	hsa-miR-23b-3p	hsa-miR-222-3p	hsa-miR-32-5p	hsa-miR-186-5p	hsa-miR-106b-5p	hsa-miR-26b-5p	hsa-miR-92a-3p	hsa-miR-615-3p	hsa-miR-1-3p	hsa-miR-221-3p	hsa-miR-100-5p	hsa-miR-335-5p	hsa-miR-320a	hsa-miR-1226-3p	hsa-miR-877-3p	hsa-miR-375	hsa-miR-497-5p
P02768_Proline_biosynthesis	Pathways	hsa-miR-92b-3p	hsa-miR-34a-5p	hsa-miR-30a-5p	hsa-let-7b-5p	hsa-let-7e-5p	hsa-miR-940
WP2018_RANKL_RANK_Signaling_Pathway	Pathways	hsa-miR-125b-5p	hsa-miR-210-3p	hsa-miR-125a-5p	hsa-miR-96-5p	hsa-miR-218-5p	hsa-miR-877-3p	hsa-miR-33a-5p	hsa-miR-143-3p	hsa-miR-214-3p	hsa-miR-149-3p	hsa-miR-296-3p	hsa-miR-1914-3p	hsa-miR-373-3p	hsa-miR-26b-5p	hsa-miR-484	hsa-miR-615-3p	hsa-miR-497-5p	hsa-miR-196a-5p	hsa-miR-92a-3p	hsa-miR-342-3p	hsa-miR-182-5p	hsa-miR-324-5p	hsa-miR-320b	hsa-miR-140-3p	hsa-miR-766-3p	hsa-miR-423-5p	hsa-miR-199a-3p	hsa-miR-30d-5p	hsa-miR-144-3p	hsa-miR-98-5p	hsa-miR-92b-3p	hsa-miR-124-3p	hsa-miR-106b-5p	hsa-miR-744-5p	hsa-miR-101-3p	hsa-miR-151a-3p	hsa-miR-200c-3p	hsa-miR-193a-3p	hsa-miR-302c-3p	hsa-miR-1256	hsa-miR-30a-5p	hsa-miR-30e-3p	hsa-miR-15b-5p	hsa-miR-99a-5p	hsa-miR-24-3p	hsa-miR-15a-5p	hsa-miR-421	hsa-miR-1296-5p
P05917_Opioid_proopiomelanocortin_pathway	Pathways	hsa-let-7b-5p	hsa-miR-98-5p	hsa-miR-34a-5p	hsa-miR-124-3p
WP1601_Fluoropyrimidine_Activity	Pathways	hsa-miR-125b-5p	hsa-let-7g-5p	hsa-miR-484	hsa-miR-197-3p	hsa-miR-1229-3p	hsa-miR-150-5p	hsa-miR-186-3p	hsa-miR-149-5p	hsa-miR-1-3p	hsa-miR-215-5p	hsa-let-7a-5p	hsa-miR-30a-5p	hsa-miR-100-5p	hsa-miR-10b-5p	hsa-miR-1285-3p	hsa-miR-877-3p	hsa-miR-326	hsa-miR-16-5p	hsa-miR-214-3p	hsa-miR-25-3p	hsa-miR-15b-5p	hsa-miR-99a-5p	hsa-miR-24-3p	hsa-miR-222-3p	hsa-miR-193b-3p	hsa-miR-26b-5p	hsa-miR-26a-5p	hsa-miR-15a-5p	hsa-miR-935	hsa-miR-454-3p	hsa-miR-93-3p	hsa-miR-605-5p	hsa-miR-188-5p	hsa-miR-520h	hsa-miR-92a-3p	hsa-miR-342-3p	hsa-miR-608	hsa-miR-221-3p	hsa-miR-29c-3p	hsa-miR-320a	hsa-miR-10a-5p	hsa-miR-125a-5p	hsa-miR-615-3p	hsa-miR-361-5p	hsa-miR-34a-5p	hsa-miR-766-3p	hsa-miR-186-5p	hsa-miR-194-5p
WP702_metapathway_biotransformation	Pathways	hsa-miR-132-3p	hsa-miR-125b-5p	hsa-miR-197-3p	hsa-miR-9-5p	hsa-miR-1229-3p	hsa-miR-152-3p	hsa-miR-17-5p	hsa-miR-149-5p	hsa-miR-1-3p	hsa-miR-215-5p	hsa-let-7a-5p	hsa-miR-30a-5p	hsa-miR-96-5p	hsa-miR-615-3p	hsa-let-7f-5p	hsa-miR-25-3p	hsa-miR-31-5p	hsa-let-7e-5p	hsa-miR-103a-2-5p	hsa-miR-15b-5p	hsa-miR-340-5p	hsa-miR-186-5p	hsa-miR-296-3p	hsa-miR-185-5p	hsa-miR-93-5p	hsa-miR-744-5p	hsa-miR-193b-3p	hsa-miR-16-5p	hsa-miR-26b-5p	hsa-miR-484	hsa-miR-1301-3p	hsa-miR-20a-5p	hsa-miR-331-3p	hsa-miR-148b-3p	hsa-miR-196a-5p	hsa-miR-27b-3p	hsa-miR-24-3p	hsa-miR-142-3p	hsa-miR-92a-3p	hsa-miR-122-5p	hsa-miR-342-5p	hsa-miR-590-3p	hsa-miR-21-5p	hsa-miR-199a-5p	hsa-miR-652-3p	hsa-miR-10a-5p	hsa-miR-631	hsa-miR-34a-5p
WP185_Integrin_mediated_cell_adhesion	Pathways	hsa-miR-125b-5p	hsa-miR-559	hsa-miR-125a-5p	hsa-miR-96-5p	hsa-miR-9-3p	hsa-miR-877-3p	hsa-miR-33a-5p	hsa-miR-143-3p	hsa-miR-214-3p	hsa-miR-149-3p	hsa-miR-296-3p	hsa-miR-34c-5p	hsa-miR-26b-5p	hsa-miR-484	hsa-miR-615-3p	hsa-miR-196a-5p	hsa-miR-1180-3p	hsa-miR-92a-3p	hsa-miR-324-5p	hsa-miR-19b-1-5p	hsa-miR-766-3p	hsa-miR-423-5p	hsa-miR-181d-5p	hsa-miR-199a-3p	hsa-miR-500a-3p	hsa-miR-98-5p	hsa-miR-92b-3p	hsa-miR-32-5p	hsa-miR-124-3p	hsa-miR-106b-5p	hsa-miR-129-1-3p	hsa-miR-744-5p	hsa-miR-101-3p	hsa-miR-200c-3p	hsa-miR-18a-3p	hsa-miR-193a-3p	hsa-miR-518b	hsa-miR-302c-3p	hsa-miR-130b-5p	hsa-miR-625-5p	hsa-miR-30c-5p	hsa-miR-30a-5p	hsa-miR-15b-5p	hsa-miR-99a-5p	hsa-miR-7-5p	hsa-miR-146b-5p	hsa-miR-1260b	hsa-miR-26a-5p
hsa00471_D_Glutamine_and_D_glutamate_metabolism	Pathways	hsa-miR-99a-5p	hsa-miR-7-5p	hsa-miR-185-5p	hsa-miR-193b-3p	hsa-miR-93-3p	hsa-miR-335-5p	hsa-miR-1226-3p
WP500_Glycogen_Metabolism	Pathways	hsa-miR-484	hsa-miR-197-3p	hsa-miR-598-3p	hsa-miR-365a-3p	hsa-miR-149-5p	hsa-miR-1914-5p	hsa-miR-1-3p	hsa-miR-215-5p	hsa-miR-25-3p	hsa-miR-30a-5p	hsa-miR-455-3p	hsa-miR-877-3p	hsa-miR-191-5p	hsa-miR-31-5p	hsa-let-7e-5p	hsa-miR-590-3p	hsa-miR-7-5p	hsa-miR-222-3p	hsa-miR-155-5p	hsa-miR-193b-3p	hsa-miR-16-5p	hsa-miR-26b-5p	hsa-miR-26a-5p	hsa-miR-15a-5p	hsa-miR-615-3p	hsa-miR-10a-5p	hsa-miR-142-3p	hsa-miR-92a-3p	hsa-miR-106b-5p	hsa-miR-122-5p	hsa-miR-30e-3p	hsa-miR-148b-3p	hsa-miR-125a-5p	hsa-miR-505-5p	hsa-miR-34a-5p	hsa-miR-421	hsa-miR-24-3p	hsa-miR-17-5p	hsa-let-7a-5p	hsa-let-7b-5p	hsa-miR-769-3p	hsa-miR-98-5p	hsa-miR-941	hsa-miR-93-5p	hsa-miR-423-3p	hsa-miR-32-5p	hsa-miR-124-3p	hsa-miR-138-5p
WP706_SIDS_Susceptibility_Pathways	Pathways	hsa-miR-18a-5p	hsa-miR-125b-5p	hsa-miR-210-3p	hsa-miR-150-5p	hsa-miR-125a-5p	hsa-miR-524-5p	hsa-miR-130b-3p	hsa-miR-218-5p	hsa-miR-30a-3p	hsa-miR-214-3p	hsa-miR-296-3p	hsa-miR-22-3p	hsa-miR-26b-5p	hsa-miR-484	hsa-miR-204-5p	hsa-miR-92a-3p	hsa-miR-182-5p	hsa-miR-324-5p	hsa-miR-140-3p	hsa-miR-1292-5p	hsa-miR-423-5p	hsa-miR-181d-5p	hsa-miR-98-5p	hsa-miR-32-5p	hsa-miR-124-3p	hsa-miR-106b-5p	hsa-miR-199b-5p	hsa-miR-744-5p	hsa-miR-134-5p	hsa-miR-200c-3p	hsa-miR-130b-5p	hsa-miR-625-5p	hsa-miR-877-3p	hsa-miR-7-5p	hsa-miR-146b-5p	hsa-miR-26a-5p	hsa-miR-15a-5p	hsa-miR-429	hsa-miR-374a-5p	hsa-miR-421	hsa-miR-1296-5p	hsa-miR-29a-3p	hsa-miR-137	hsa-miR-1307-3p	hsa-miR-221-3p	hsa-miR-194-5p	hsa-miR-488-5p	hsa-miR-34a-5p
WP268_Notch_Signaling_Pathway	Pathways	hsa-miR-125b-5p	hsa-miR-2110	hsa-miR-150-5p	hsa-miR-524-5p	hsa-miR-296-3p	hsa-miR-34c-5p	hsa-miR-26b-5p	hsa-miR-484	hsa-miR-615-3p	hsa-miR-196a-5p	hsa-miR-92a-3p	hsa-miR-144-3p	hsa-miR-98-5p	hsa-miR-32-5p	hsa-miR-124-3p	hsa-miR-106b-5p	hsa-miR-181c-5p	hsa-miR-199b-5p	hsa-miR-744-5p	hsa-miR-200c-3p	hsa-miR-18a-3p	hsa-miR-130b-5p	hsa-miR-30a-5p	hsa-miR-137	hsa-miR-129-5p	hsa-miR-24-3p	hsa-miR-26a-5p	hsa-miR-324-3p	hsa-miR-93-5p	hsa-miR-449b-5p	hsa-miR-326	hsa-miR-221-3p	hsa-miR-19b-3p	hsa-miR-940	hsa-miR-769-5p	hsa-miR-23b-3p	hsa-miR-335-5p	hsa-miR-449a	hsa-miR-27b-3p	hsa-miR-18a-5p	hsa-miR-203a-3p	hsa-miR-671-5p	hsa-miR-10b-5p	hsa-miR-25-3p	hsa-miR-31-5p	hsa-miR-16-5p	hsa-miR-222-3p	hsa-miR-1301-3p
P00053_T_cell_activation	Pathways	hsa-miR-125b-5p	hsa-miR-210-3p	hsa-miR-199a-3p	hsa-miR-125a-5p	hsa-miR-96-5p	hsa-miR-218-5p	hsa-miR-877-3p	hsa-miR-33a-5p	hsa-miR-143-3p	hsa-miR-214-3p	hsa-miR-149-3p	hsa-miR-296-3p	hsa-miR-1914-3p	hsa-miR-26b-5p	hsa-miR-484	hsa-miR-615-3p	hsa-miR-376a-3p	hsa-miR-98-5p	hsa-miR-1180-3p	hsa-miR-92a-3p	hsa-miR-342-3p	hsa-miR-320b	hsa-miR-140-3p	hsa-miR-766-3p	hsa-miR-423-5p	hsa-miR-181d-5p	hsa-miR-324-3p	hsa-miR-500a-3p	hsa-miR-361-3p	hsa-miR-92b-3p	hsa-miR-32-5p	hsa-miR-124-3p	hsa-miR-106b-5p	hsa-miR-181c-5p	hsa-miR-744-5p	hsa-miR-101-3p	hsa-miR-151a-3p	hsa-miR-200c-3p	hsa-miR-18a-3p	hsa-miR-302c-3p	hsa-miR-30a-5p	hsa-miR-30e-3p	hsa-miR-15b-5p	hsa-miR-7-5p	hsa-miR-146b-5p	hsa-miR-15a-5p	hsa-miR-622	hsa-miR-421
hsa00511_Other_glycan_degradation	Pathways	hsa-miR-744-5p	hsa-miR-1229-3p	hsa-miR-150-5p	hsa-miR-124-3p	hsa-miR-615-3p	hsa-miR-155-5p	hsa-miR-30a-5p	hsa-miR-335-5p	hsa-let-7b-5p	hsa-let-7a-5p	hsa-miR-191-5p	hsa-miR-26b-5p
P00050_Plasminogen_activating_cascade	Pathways	hsa-miR-132-3p	hsa-miR-125b-5p	hsa-miR-9-5p	hsa-miR-215-5p	hsa-miR-100-5p	hsa-miR-30c-5p	hsa-miR-143-3p	hsa-miR-99a-5p	hsa-miR-222-3p	hsa-miR-193b-3p	hsa-miR-16-5p	hsa-miR-26b-5p	hsa-miR-204-5p	hsa-miR-29a-3p	hsa-miR-409-3p	hsa-miR-21-5p	hsa-miR-29c-3p	hsa-miR-301a-3p	hsa-miR-140-5p	hsa-miR-145-5p	hsa-miR-144-3p	hsa-miR-29b-3p	hsa-miR-23b-3p	hsa-miR-124-3p	hsa-miR-138-5p	hsa-miR-192-5p	hsa-miR-27a-3p	hsa-miR-155-5p	hsa-miR-335-5p	hsa-miR-27b-3p
P00033_Insulin_IGF_pathway_protein_kinase_B_signaling_cascade	Pathways	hsa-miR-125b-5p	hsa-miR-150-5p	hsa-miR-125a-5p	hsa-miR-1226-3p	hsa-miR-96-5p	hsa-miR-141-3p	hsa-miR-877-3p	hsa-miR-33a-5p	hsa-miR-143-3p	hsa-miR-214-3p	hsa-miR-149-3p	hsa-miR-296-3p	hsa-miR-22-3p	hsa-miR-26b-5p	hsa-miR-484	hsa-miR-615-3p	hsa-miR-497-5p	hsa-miR-196a-5p	hsa-miR-92a-3p	hsa-miR-182-5p	hsa-miR-423-5p	hsa-miR-519c-3p	hsa-miR-144-3p	hsa-miR-98-5p	hsa-let-7i-5p	hsa-miR-657	hsa-miR-32-5p	hsa-miR-124-3p	hsa-miR-106b-5p	hsa-miR-744-5p	hsa-miR-18a-3p	hsa-miR-302c-3p	hsa-miR-383-5p	hsa-miR-30c-5p	hsa-miR-30a-5p	hsa-miR-425-5p	hsa-miR-148a-3p	hsa-miR-15b-5p	hsa-miR-99a-5p	hsa-miR-7-5p	hsa-miR-26a-5p	hsa-miR-1296-5p	hsa-miR-93-5p	hsa-miR-29a-3p	hsa-miR-326	hsa-miR-652-3p	hsa-miR-148b-3p	hsa-miR-221-3p
hsa02010_ABC_transporters	Pathways	hsa-miR-132-3p	hsa-miR-125b-5p	hsa-miR-484	hsa-miR-197-3p	hsa-miR-9-5p	hsa-miR-192-5p	hsa-miR-346	hsa-miR-1-3p	hsa-miR-215-5p	hsa-miR-30a-5p	hsa-miR-935	hsa-miR-519c-3p	hsa-miR-33a-5p	hsa-miR-16-5p	hsa-miR-7-5p	hsa-miR-433-3p	hsa-miR-195-5p	hsa-miR-26b-5p	hsa-miR-26a-5p	hsa-miR-615-3p	hsa-miR-19a-3p	hsa-miR-148b-3p	hsa-miR-188-5p	hsa-miR-296-5p	hsa-miR-1229-3p	hsa-miR-92a-3p	hsa-miR-134-5p	hsa-miR-324-5p	hsa-miR-21-5p	hsa-miR-339-5p	hsa-miR-10a-5p	hsa-miR-520h	hsa-miR-142-3p	hsa-miR-423-5p	hsa-miR-509-3p	hsa-let-7b-5p	hsa-miR-210-3p	hsa-miR-98-5p	hsa-miR-17-3p	hsa-miR-23b-3p	hsa-miR-92b-3p	hsa-miR-124-3p	hsa-miR-183-5p	hsa-miR-451a	hsa-miR-33b-5p	hsa-miR-20a-5p	hsa-miR-27a-3p	hsa-miR-155-5p
WP615_Senescence_and_Autophagy	Pathways	hsa-miR-125b-5p	hsa-miR-150-5p	hsa-miR-24-2-5p	hsa-miR-675-5p	hsa-miR-941	hsa-miR-130b-3p	hsa-miR-18b-5p	hsa-miR-96-5p	hsa-miR-218-5p	hsa-miR-877-3p	hsa-miR-33a-5p	hsa-miR-143-3p	hsa-miR-214-3p	hsa-miR-149-3p	hsa-miR-296-3p	hsa-miR-34c-5p	hsa-miR-373-3p	hsa-miR-26b-5p	hsa-miR-484	hsa-miR-204-5p	hsa-miR-497-5p	hsa-miR-196a-5p	hsa-miR-302a-3p	hsa-miR-92a-3p	hsa-miR-342-3p	hsa-miR-182-5p	hsa-miR-324-5p	hsa-miR-409-3p	hsa-miR-520b	hsa-miR-125a-5p	hsa-miR-615-3p	hsa-miR-483-3p	hsa-miR-421	hsa-miR-423-5p	hsa-miR-190a-5p	hsa-miR-181d-5p	hsa-miR-199a-3p	hsa-miR-519c-3p	hsa-miR-144-3p	hsa-miR-98-5p	hsa-miR-657	hsa-miR-92b-3p	hsa-miR-32-5p	hsa-miR-124-3p	hsa-miR-106b-5p	hsa-miR-766-3p	hsa-miR-181c-5p	hsa-miR-744-5p
hsa05213_Endometrial_cancer	Pathways	hsa-miR-125b-5p	hsa-miR-559	hsa-miR-210-3p	hsa-miR-150-5p	hsa-miR-19b-1-5p	hsa-let-7a-5p	hsa-miR-96-5p	hsa-miR-141-3p	hsa-miR-30d-5p	hsa-miR-877-3p	hsa-miR-143-3p	hsa-miR-214-3p	hsa-miR-149-3p	hsa-miR-296-3p	hsa-miR-34c-5p	hsa-miR-26b-5p	hsa-miR-484	hsa-miR-615-3p	hsa-miR-497-5p	hsa-miR-196a-5p	hsa-miR-92a-3p	hsa-miR-182-5p	hsa-miR-324-5p	hsa-miR-520b	hsa-miR-125a-5p	hsa-miR-532-3p	hsa-miR-766-3p	hsa-miR-423-5p	hsa-miR-181d-5p	hsa-miR-199a-3p	hsa-miR-519c-3p	hsa-miR-144-3p	hsa-miR-98-5p	hsa-miR-320a	hsa-miR-92b-3p	hsa-miR-124-3p	hsa-miR-106b-5p	hsa-miR-181c-5p	hsa-miR-199b-5p	hsa-miR-744-5p	hsa-miR-101-3p	hsa-miR-503-5p	hsa-miR-200c-3p	hsa-miR-18a-3p	hsa-miR-302c-3p	hsa-miR-542-5p	hsa-miR-625-5p	hsa-miR-30c-5p
P00008_Axon_guidance_mediated_by_Slit_Robo	Pathways	hsa-miR-203a-3p	hsa-miR-29c-3p	hsa-miR-125b-5p	hsa-miR-150-5p	hsa-miR-149-5p	hsa-miR-1-3p	hsa-miR-25-3p	hsa-miR-30a-5p	hsa-miR-217	hsa-miR-455-3p	hsa-miR-146a-5p	hsa-miR-30c-5p	hsa-miR-216a-5p	hsa-miR-31-5p	hsa-miR-185-5p	hsa-miR-195-5p	hsa-miR-155-5p	hsa-miR-193b-3p	hsa-miR-1296-5p	hsa-miR-26b-5p	hsa-miR-484	hsa-miR-101-3p	hsa-miR-93-3p	hsa-miR-302b-3p	hsa-miR-142-3p	hsa-miR-421	hsa-miR-342-3p	hsa-miR-122-5p	hsa-miR-608	hsa-miR-29a-3p	hsa-miR-223-3p	hsa-miR-21-5p	hsa-miR-137	hsa-miR-652-3p	hsa-miR-148b-3p	hsa-miR-194-5p	hsa-miR-126-3p	hsa-let-7b-5p	hsa-miR-29b-3p	hsa-miR-423-3p	hsa-miR-124-3p	hsa-miR-138-5p	hsa-miR-106b-5p	hsa-miR-372-3p	hsa-miR-23a-3p	hsa-miR-335-5p	hsa-miR-224-5p	hsa-miR-330-3p
hsa04662_B_cell_receptor_signaling_pathway	Pathways	hsa-miR-125b-5p	hsa-miR-210-3p	hsa-miR-199a-3p	hsa-miR-96-5p	hsa-miR-218-5p	hsa-miR-877-3p	hsa-miR-33a-5p	hsa-miR-143-3p	hsa-miR-149-3p	hsa-miR-296-3p	hsa-miR-373-3p	hsa-miR-26b-5p	hsa-miR-615-3p	hsa-miR-497-5p	hsa-miR-98-5p	hsa-miR-92a-3p	hsa-miR-342-3p	hsa-miR-324-5p	hsa-miR-320b	hsa-miR-532-3p	hsa-miR-766-3p	hsa-miR-423-5p	hsa-miR-181d-5p	hsa-miR-324-3p	hsa-miR-361-3p	hsa-miR-92b-3p	hsa-miR-124-3p	hsa-miR-106b-5p	hsa-miR-181c-5p	hsa-miR-744-5p	hsa-miR-101-3p	hsa-miR-151a-3p	hsa-miR-200c-3p	hsa-miR-18a-3p	hsa-miR-302c-3p	hsa-miR-30a-5p	hsa-miR-15b-5p	hsa-miR-7-5p	hsa-miR-1260b	hsa-miR-26a-5p	hsa-miR-15a-5p	hsa-miR-622	hsa-miR-1296-5p	hsa-miR-93-5p	hsa-miR-29a-3p	hsa-miR-30e-3p	hsa-miR-652-3p	hsa-miR-148b-3p
hsa04350_TGF_beta_signaling_pathway	Pathways	hsa-miR-125b-5p	hsa-miR-210-3p	hsa-miR-150-5p	hsa-miR-125a-5p	hsa-miR-941	hsa-miR-130b-3p	hsa-miR-218-5p	hsa-miR-30a-3p	hsa-miR-34c-5p	hsa-miR-22-3p	hsa-miR-26b-5p	hsa-miR-484	hsa-miR-615-3p	hsa-miR-92a-3p	hsa-miR-342-3p	hsa-miR-182-5p	hsa-miR-324-5p	hsa-miR-409-3p	hsa-miR-520h	hsa-miR-483-3p	hsa-miR-505-5p	hsa-miR-423-5p	hsa-miR-181d-5p	hsa-miR-199a-3p	hsa-miR-30d-5p	hsa-miR-98-5p	hsa-miR-92b-3p	hsa-miR-454-3p	hsa-miR-124-3p	hsa-miR-106b-5p	hsa-miR-766-3p	hsa-miR-181c-5p	hsa-miR-744-5p	hsa-miR-101-3p	hsa-miR-374a-5p	hsa-miR-200c-3p	hsa-miR-302c-3p	hsa-miR-130b-5p	hsa-miR-376a-5p	hsa-miR-625-5p	hsa-miR-30c-5p	hsa-miR-30a-5p	hsa-miR-455-3p	hsa-miR-151a-5p	hsa-miR-877-3p	hsa-miR-148a-3p	hsa-miR-15b-5p	hsa-miR-129-5p
hsa00250_Alanine_aspartate_and_glutamate_metabolism	Pathways	hsa-miR-125b-5p	hsa-miR-149-5p	hsa-miR-1-3p	hsa-miR-215-5p	hsa-miR-1226-3p	hsa-miR-877-5p	hsa-miR-425-5p	hsa-miR-96-5p	hsa-miR-25-3p	hsa-miR-16-5p	hsa-miR-590-3p	hsa-miR-99a-5p	hsa-miR-7-5p	hsa-miR-185-5p	hsa-miR-193b-3p	hsa-let-7e-5p	hsa-miR-26b-5p	hsa-miR-484	hsa-miR-615-3p	hsa-miR-331-3p	hsa-miR-93-3p	hsa-miR-196a-5p	hsa-miR-30b-5p	hsa-miR-92a-3p	hsa-miR-342-3p	hsa-miR-29a-3p	hsa-miR-324-5p	hsa-miR-296-3p	hsa-miR-320b	hsa-miR-505-5p	hsa-miR-34a-5p	hsa-miR-937-3p	hsa-miR-186-5p	hsa-miR-32-5p	hsa-miR-24-3p	hsa-miR-301a-3p	hsa-miR-17-5p	hsa-let-7a-5p	hsa-let-7b-5p	hsa-miR-3200-3p	hsa-miR-1909-5p	hsa-miR-98-5p	hsa-miR-17-3p	hsa-miR-769-5p	hsa-miR-128-3p	hsa-miR-92b-3p	hsa-miR-877-3p	hsa-miR-124-3p
WP78_TCA_Cycle	Pathways	hsa-miR-125b-5p	hsa-miR-28-5p	hsa-miR-17-5p	hsa-miR-125a-5p	hsa-miR-1-3p	hsa-miR-30a-5p	hsa-miR-877-3p	hsa-miR-16-5p	hsa-miR-103a-2-5p	hsa-miR-99a-5p	hsa-miR-7-5p	hsa-miR-222-3p	hsa-miR-193b-3p	hsa-miR-1260b	hsa-miR-484	hsa-miR-1301-3p	hsa-miR-615-3p	hsa-miR-93-3p	hsa-miR-27b-3p	hsa-miR-92a-3p	hsa-miR-342-3p	hsa-miR-122-5p	hsa-miR-324-5p	hsa-miR-320a	hsa-miR-361-5p	hsa-miR-34a-5p	hsa-miR-92b-5p	hsa-miR-324-3p	hsa-let-7a-5p	hsa-let-7b-5p	hsa-miR-423-3p	hsa-miR-339-5p	hsa-miR-92b-3p	hsa-miR-124-3p	hsa-miR-183-5p	hsa-let-7a-3p	hsa-miR-106a-5p	hsa-miR-335-5p	hsa-miR-503-5p	hsa-miR-760	hsa-miR-26b-5p	hsa-miR-425-3p
hsa04330_Notch_signaling_pathway	Pathways	hsa-miR-125b-5p	hsa-miR-2110	hsa-miR-150-5p	hsa-miR-524-5p	hsa-miR-30a-3p	hsa-miR-296-3p	hsa-miR-34c-5p	hsa-miR-26b-5p	hsa-miR-484	hsa-miR-615-3p	hsa-miR-196a-5p	hsa-miR-92a-3p	hsa-miR-182-5p	hsa-miR-181d-5p	hsa-miR-144-3p	hsa-miR-98-5p	hsa-miR-32-5p	hsa-miR-124-3p	hsa-miR-106b-5p	hsa-miR-181c-5p	hsa-miR-199b-5p	hsa-miR-744-5p	hsa-miR-374a-5p	hsa-miR-200c-3p	hsa-miR-18a-3p	hsa-miR-130b-5p	hsa-miR-30c-5p	hsa-miR-30a-5p	hsa-miR-137	hsa-miR-129-5p	hsa-miR-24-3p	hsa-miR-26a-5p	hsa-miR-429	hsa-miR-324-3p	hsa-miR-93-5p	hsa-miR-562	hsa-miR-326	hsa-miR-221-3p	hsa-miR-194-5p	hsa-miR-19b-3p	hsa-miR-940	hsa-miR-769-5p	hsa-miR-23b-3p	hsa-miR-335-5p	hsa-miR-449a	hsa-miR-27b-3p	hsa-miR-18a-5p	hsa-miR-671-5p
P04372_5_Hydroxytryptamine_degredation	Pathways	hsa-miR-9-5p	hsa-miR-497-5p	hsa-miR-130b-5p	hsa-miR-1-3p	hsa-miR-215-5p	hsa-let-7a-5p	hsa-miR-100-5p	hsa-miR-328-3p	hsa-miR-16-5p	hsa-miR-7-5p	hsa-miR-22-3p	hsa-miR-193b-3p	hsa-miR-1247-5p	hsa-miR-615-3p	hsa-miR-10a-5p	hsa-miR-92a-3p	hsa-miR-148b-3p	hsa-miR-34a-5p	hsa-miR-145-5p	hsa-miR-186-5p	hsa-miR-1226-3p	hsa-let-7b-5p	hsa-miR-128-3p	hsa-miR-124-3p	hsa-miR-192-5p	hsa-miR-27a-3p	hsa-miR-155-5p	hsa-miR-99b-5p	hsa-miR-335-5p	hsa-let-7f-5p
hsa04110_Cell_cycle	Pathways	hsa-miR-125b-5p	hsa-miR-210-3p	hsa-miR-150-5p	hsa-miR-19b-1-5p	hsa-miR-675-5p	hsa-miR-130b-3p	hsa-miR-96-5p	hsa-miR-218-5p	hsa-miR-877-3p	hsa-miR-942-5p	hsa-miR-143-3p	hsa-miR-214-3p	hsa-miR-149-3p	hsa-miR-26b-3p	hsa-miR-296-3p	hsa-miR-34c-5p	hsa-miR-22-3p	hsa-miR-26b-5p	hsa-miR-484	hsa-miR-615-3p	hsa-miR-885-5p	hsa-miR-196a-5p	hsa-miR-188-5p	hsa-miR-361-3p	hsa-miR-1229-3p	hsa-miR-92a-3p	hsa-miR-342-3p	hsa-miR-182-5p	hsa-miR-324-5p	hsa-miR-520b	hsa-miR-874-3p	hsa-miR-125a-5p	hsa-miR-338-3p	hsa-miR-766-3p	hsa-miR-320b	hsa-miR-505-5p	hsa-miR-423-5p	hsa-miR-190a-5p	hsa-miR-181d-5p	hsa-miR-1296-5p	hsa-miR-519c-3p	hsa-miR-30b-5p	hsa-miR-98-5p	hsa-let-7i-5p	hsa-miR-657	hsa-miR-92b-3p	hsa-miR-32-5p	hsa-miR-124-3p
hsa00450_Selenoamino_acid_metabolism	Pathways	hsa-miR-18a-5p	hsa-miR-1229-3p	hsa-miR-221-3p	hsa-miR-149-5p	hsa-miR-215-5p	hsa-miR-30a-5p	hsa-miR-196b-5p	hsa-let-7b-5p	hsa-miR-16-5p	hsa-miR-296-3p	hsa-miR-185-5p	hsa-miR-193b-3p	hsa-miR-26b-5p	hsa-miR-484	hsa-miR-1301-3p	hsa-miR-615-3p	hsa-miR-331-3p	hsa-miR-92a-3p	hsa-miR-324-3p	hsa-miR-324-5p	hsa-miR-346	hsa-miR-326	hsa-miR-652-3p	hsa-miR-10a-5p	hsa-miR-125a-5p	hsa-miR-505-5p	hsa-let-7a-5p	hsa-miR-222-3p	hsa-miR-339-5p	hsa-miR-186-5p	hsa-miR-106b-5p	hsa-miR-124-3p	hsa-miR-192-5p	hsa-miR-106b-3p	hsa-miR-155-5p	hsa-miR-100-5p	hsa-miR-335-5p	hsa-miR-375
hsa00534_Heparan_sulfate_biosynthesis	Pathways	hsa-miR-132-3p	hsa-miR-125b-5p	hsa-miR-152-3p	hsa-miR-1-3p	hsa-miR-215-5p	hsa-miR-10b-5p	hsa-miR-218-5p	hsa-let-7e-5p	hsa-miR-18a-5p	hsa-miR-99a-5p	hsa-miR-296-3p	hsa-miR-193b-3p	hsa-miR-16-5p	hsa-miR-26b-5p	hsa-miR-484	hsa-miR-1301-3p	hsa-miR-615-3p	hsa-miR-331-3p	hsa-miR-30b-5p	hsa-miR-92a-3p	hsa-miR-93-5p	hsa-miR-21-5p	hsa-miR-10a-5p	hsa-miR-34a-5p	hsa-miR-19b-3p	hsa-miR-1226-3p	hsa-let-7b-5p	hsa-miR-124-3p	hsa-miR-192-5p	hsa-miR-20a-5p	hsa-miR-500a-5p	hsa-miR-335-5p	hsa-miR-320a	hsa-miR-375
P00042_Muscarinic_acetylcholine_receptor_1_and_3_signaling_pathway	Pathways	hsa-miR-125b-5p	hsa-miR-9-5p	hsa-miR-24-2-5p	hsa-miR-1-3p	hsa-miR-130b-3p	hsa-miR-30a-5p	hsa-miR-100-5p	hsa-miR-96-5p	hsa-miR-615-3p	hsa-miR-877-3p	hsa-miR-31-5p	hsa-miR-16-5p	hsa-miR-148a-3p	hsa-miR-340-5p	hsa-miR-186-5p	hsa-miR-296-3p	hsa-miR-330-5p	hsa-miR-155-5p	hsa-miR-193b-3p	hsa-let-7e-5p	hsa-miR-26b-5p	hsa-miR-484	hsa-miR-27b-3p	hsa-miR-935	hsa-miR-331-3p	hsa-miR-205-5p	hsa-miR-505-3p	hsa-miR-30b-5p	hsa-miR-142-3p	hsa-miR-92a-3p	hsa-miR-342-3p	hsa-miR-93-5p	hsa-miR-324-5p	hsa-miR-21-5p	hsa-miR-29c-3p	hsa-miR-148b-3p	hsa-miR-34a-5p	hsa-miR-505-5p	hsa-miR-7-5p	hsa-miR-19b-3p	hsa-miR-17-5p	hsa-miR-1226-3p	hsa-let-7b-5p	hsa-miR-98-5p	hsa-miR-17-3p	hsa-miR-23b-3p	hsa-miR-128-3p	hsa-miR-92b-3p
P00036_Interleukin_signaling_pathway	Pathways	hsa-miR-125b-5p	hsa-miR-210-3p	hsa-miR-199a-3p	hsa-miR-125a-5p	hsa-miR-96-5p	hsa-miR-141-3p	hsa-miR-218-5p	hsa-miR-877-3p	hsa-miR-942-5p	hsa-miR-143-3p	hsa-miR-214-3p	hsa-miR-149-3p	hsa-miR-296-3p	hsa-miR-34c-5p	hsa-miR-26b-5p	hsa-miR-484	hsa-miR-615-3p	hsa-miR-196a-5p	hsa-miR-1229-3p	hsa-miR-92a-3p	hsa-miR-182-5p	hsa-miR-324-5p	hsa-miR-520b	hsa-miR-520h	hsa-miR-766-3p	hsa-miR-423-5p	hsa-miR-190a-5p	hsa-miR-324-3p	hsa-miR-519c-3p	hsa-miR-144-3p	hsa-miR-98-5p	hsa-let-7i-5p	hsa-miR-657	hsa-miR-569	hsa-miR-92b-3p	hsa-miR-124-3p	hsa-miR-106b-5p	hsa-miR-181c-5p	hsa-miR-744-5p	hsa-miR-372-3p	hsa-miR-151a-3p	hsa-miR-503-5p	hsa-miR-200c-3p	hsa-miR-18a-3p	hsa-miR-302c-3p	hsa-miR-520a-3p	hsa-miR-625-5p	hsa-miR-30a-5p
P00043_Muscarinic_acetylcholine_receptor_2_and_4_signaling_pathway	Pathways	hsa-miR-132-3p	hsa-miR-9-5p	hsa-miR-148a-3p	hsa-miR-130b-3p	hsa-miR-197-3p	hsa-miR-425-5p	hsa-miR-1-3p	hsa-miR-215-5p	hsa-miR-25-3p	hsa-miR-30a-5p	hsa-miR-100-5p	hsa-miR-96-5p	hsa-miR-204-5p	hsa-miR-30d-5p	hsa-miR-877-3p	hsa-miR-16-5p	hsa-miR-181a-5p	hsa-miR-590-3p	hsa-miR-423-5p	hsa-miR-7-5p	hsa-miR-365a-3p	hsa-miR-22-3p	hsa-miR-330-5p	hsa-miR-155-5p	hsa-miR-193b-3p	hsa-let-7e-5p	hsa-miR-26b-5p	hsa-miR-484	hsa-miR-505-3p	hsa-miR-935	hsa-miR-331-3p	hsa-miR-196a-5p	hsa-miR-30b-5p	hsa-miR-92a-3p	hsa-miR-1296-5p	hsa-miR-93-5p	hsa-miR-324-5p	hsa-miR-21-5p	hsa-miR-1260b	hsa-miR-29c-3p	hsa-miR-148b-3p	hsa-miR-19b-3p	hsa-miR-186-5p	hsa-miR-24-3p	hsa-miR-34a-5p	hsa-miR-30e-5p	hsa-miR-17-5p	hsa-let-7b-5p
hsa00770_Pantothenate_and_CoA_biosynthesis	Pathways	hsa-miR-26a-5p	hsa-miR-497-5p	hsa-let-7a-5p	hsa-miR-100-5p	hsa-miR-877-3p	hsa-miR-186-5p	hsa-miR-222-3p	hsa-miR-26b-5p	hsa-miR-484	hsa-miR-615-3p	hsa-miR-331-3p	hsa-miR-92a-3p	hsa-miR-21-5p	hsa-miR-10a-5p	hsa-miR-221-3p	hsa-miR-1226-3p	hsa-let-7b-5p	hsa-miR-769-5p	hsa-miR-23b-3p	hsa-miR-32-5p	hsa-miR-124-3p	hsa-miR-106b-5p	hsa-miR-155-5p	hsa-miR-320a	hsa-miR-375	hsa-miR-760
P00007_Axon_guidance_mediated_by_semaphorins	Pathways	hsa-miR-26a-5p	hsa-miR-130b-5p	hsa-miR-1-3p	hsa-miR-215-5p	hsa-miR-31-3p	hsa-let-7b-5p	hsa-miR-30c-5p	hsa-miR-31-5p	hsa-miR-16-5p	hsa-miR-214-3p	hsa-miR-25-3p	hsa-miR-186-5p	hsa-miR-7-5p	hsa-miR-185-5p	hsa-miR-193b-3p	hsa-miR-26b-5p	hsa-miR-484	hsa-miR-615-3p	hsa-miR-19a-3p	hsa-miR-93-3p	hsa-miR-142-3p	hsa-miR-122-5p	hsa-miR-30c-2-3p	hsa-miR-377-3p	hsa-miR-331-3p	hsa-miR-652-3p	hsa-miR-10a-5p	hsa-miR-221-3p	hsa-miR-194-5p	hsa-miR-423-5p	hsa-miR-17-5p	hsa-miR-146b-5p	hsa-miR-181a-5p	hsa-miR-128-3p	hsa-miR-124-3p	hsa-miR-192-5p	hsa-miR-20a-5p	hsa-miR-155-5p	hsa-miR-101-3p	hsa-miR-146a-3p	hsa-miR-320c	hsa-miR-335-5p	hsa-miR-320a	hsa-miR-200c-3p	hsa-miR-425-5p	hsa-miR-375
P00057_Wnt_signaling_pathway	Pathways	hsa-miR-125b-5p	hsa-miR-210-3p	hsa-miR-150-5p	hsa-miR-19b-1-5p	hsa-miR-1226-3p	hsa-miR-96-5p	hsa-miR-141-3p	hsa-miR-218-5p	hsa-miR-30a-3p	hsa-miR-33a-5p	hsa-miR-214-3p	hsa-miR-18a-5p	hsa-miR-296-3p	hsa-miR-34c-5p	hsa-miR-22-3p	hsa-miR-26b-5p	hsa-miR-484	hsa-miR-204-5p	hsa-miR-196a-5p	hsa-miR-361-3p	hsa-miR-1229-3p	hsa-miR-92a-3p	hsa-miR-342-3p	hsa-miR-182-5p	hsa-miR-324-5p	hsa-miR-520b	hsa-miR-125a-5p	hsa-miR-338-3p	hsa-miR-483-3p	hsa-miR-505-5p	hsa-miR-423-5p	hsa-miR-181d-5p	hsa-miR-199a-3p	hsa-miR-19b-3p	hsa-miR-30d-5p	hsa-miR-98-5p	hsa-let-7i-5p	hsa-miR-657	hsa-miR-92b-3p	hsa-miR-877-3p	hsa-miR-124-3p	hsa-miR-106b-5p	hsa-miR-27b-5p	hsa-miR-181c-5p	hsa-miR-181a-2-3p	hsa-miR-744-5p	hsa-miR-101-3p	hsa-miR-374a-5p
P02787_Vitamin_B6_metabolism	Pathways	hsa-miR-18a-5p	hsa-miR-125b-5p	hsa-miR-24-3p	hsa-miR-155-5p	hsa-miR-193b-3p	hsa-miR-760	hsa-miR-484	hsa-miR-1-3p	hsa-miR-744-5p	hsa-miR-30a-5p	hsa-miR-504-5p	hsa-miR-26b-5p	hsa-miR-92a-3p	hsa-miR-342-3p	hsa-miR-16-5p	hsa-miR-1260b
WP2037_Prolactin_Signaling_Pathway	Pathways	hsa-miR-125b-5p	hsa-miR-559	hsa-miR-210-3p	hsa-miR-125a-5p	hsa-miR-1226-3p	hsa-miR-96-5p	hsa-miR-9-3p	hsa-miR-877-3p	hsa-miR-33a-5p	hsa-miR-143-3p	hsa-miR-214-3p	hsa-miR-149-3p	hsa-miR-296-3p	hsa-miR-34c-5p	hsa-miR-373-3p	hsa-miR-26b-5p	hsa-miR-484	hsa-miR-615-3p	hsa-miR-497-5p	hsa-miR-196a-5p	hsa-miR-1229-3p	hsa-miR-92a-3p	hsa-miR-342-3p	hsa-miR-324-5p	hsa-miR-140-3p	hsa-miR-766-3p	hsa-miR-423-5p	hsa-miR-181d-5p	hsa-miR-199a-3p	hsa-miR-19b-3p	hsa-miR-30d-5p	hsa-miR-144-3p	hsa-miR-98-5p	hsa-let-7i-5p	hsa-miR-92b-3p	hsa-miR-124-3p	hsa-miR-106b-5p	hsa-miR-199b-5p	hsa-miR-744-5p	hsa-miR-101-3p	hsa-miR-503-5p	hsa-miR-200c-3p	hsa-miR-18a-3p	hsa-miR-342-5p	hsa-miR-193a-3p	hsa-miR-302c-3p	hsa-miR-218-5p	hsa-miR-383-5p
hsa04070_Phosphatidylinositol_signaling_system	Pathways	hsa-miR-18a-5p	hsa-miR-125b-5p	hsa-miR-24-2-5p	hsa-miR-1226-3p	hsa-miR-96-5p	hsa-miR-141-3p	hsa-miR-877-3p	hsa-miR-214-3p	hsa-miR-296-3p	hsa-miR-1914-3p	hsa-miR-22-3p	hsa-miR-26b-5p	hsa-miR-484	hsa-miR-615-3p	hsa-miR-376a-3p	hsa-miR-92a-3p	hsa-miR-182-5p	hsa-miR-324-5p	hsa-miR-423-5p	hsa-miR-519c-3p	hsa-miR-144-3p	hsa-miR-98-5p	hsa-let-7i-5p	hsa-miR-32-5p	hsa-miR-124-3p	hsa-miR-106b-5p	hsa-miR-744-5p	hsa-miR-101-3p	hsa-miR-18a-3p	hsa-miR-328-3p	hsa-miR-877-5p	hsa-miR-15b-5p	hsa-miR-7-5p	hsa-miR-26a-5p	hsa-miR-421	hsa-miR-324-3p	hsa-miR-93-5p	hsa-miR-29a-3p	hsa-miR-326	hsa-miR-148b-3p	hsa-miR-221-3p	hsa-miR-19b-3p	hsa-miR-222-3p	hsa-miR-29b-3p	hsa-miR-23b-3p	hsa-miR-133a-3p	hsa-miR-335-5p	hsa-miR-320a
P05730_Endogenous_cannabinoid_signaling	Pathways	hsa-miR-197-3p	hsa-miR-1-3p	hsa-miR-30a-5p	hsa-miR-100-5p	hsa-miR-30c-5p	hsa-let-7e-5p	hsa-miR-155-5p	hsa-miR-16-5p	hsa-miR-26b-5p	hsa-miR-484	hsa-miR-331-3p	hsa-miR-93-5p	hsa-miR-324-5p	hsa-miR-21-5p	hsa-miR-29c-3p	hsa-miR-186-5p	hsa-miR-423-5p	hsa-miR-17-5p	hsa-let-7b-5p	hsa-miR-181a-5p	hsa-miR-98-5p	hsa-miR-92b-3p	hsa-miR-124-3p	hsa-miR-589-3p	hsa-miR-27b-3p	hsa-miR-744-5p	hsa-miR-101-3p	hsa-miR-23a-3p	hsa-miR-335-5p	hsa-miR-106a-5p	hsa-miR-103a-3p
hsa05110_Vibrio_cholerae_infection	Pathways	hsa-miR-24-2-5p	hsa-miR-130b-3p	hsa-miR-96-5p	hsa-miR-218-5p	hsa-miR-877-3p	hsa-miR-296-3p	hsa-miR-1914-3p	hsa-miR-22-3p	hsa-miR-26b-5p	hsa-miR-484	hsa-miR-615-3p	hsa-miR-196a-5p	hsa-miR-92a-3p	hsa-miR-342-3p	hsa-miR-182-5p	hsa-miR-324-5p	hsa-let-7c-3p	hsa-miR-423-5p	hsa-miR-509-3p	hsa-miR-1296-5p	hsa-miR-98-5p	hsa-miR-124-3p	hsa-miR-106b-5p	hsa-miR-644a	hsa-miR-744-5p	hsa-miR-503-5p	hsa-miR-18a-3p	hsa-miR-877-5p	hsa-miR-455-3p	hsa-miR-15b-5p	hsa-miR-99a-5p	hsa-miR-7-5p	hsa-miR-1227-3p	hsa-miR-1260b	hsa-miR-15a-5p	hsa-miR-421	hsa-miR-324-3p	hsa-miR-93-5p	hsa-miR-326	hsa-miR-1307-3p	hsa-miR-652-3p	hsa-miR-221-3p	hsa-miR-19b-3p	hsa-miR-222-3p	hsa-miR-125a-3p	hsa-miR-1226-5p	hsa-miR-133a-3p	hsa-miR-423-3p
WP322_Osteoblast	Pathways	hsa-miR-18a-5p	hsa-miR-215-5p	hsa-miR-146b-3p	hsa-miR-30c-5p	hsa-miR-143-3p	hsa-miR-26b-5p	hsa-miR-204-5p	hsa-miR-196a-5p	hsa-miR-142-3p	hsa-miR-21-5p	hsa-miR-29c-3p	hsa-miR-135b-5p	hsa-miR-34a-5p	hsa-miR-140-5p	hsa-let-7a-5p	hsa-let-7b-5p	hsa-miR-98-5p	hsa-miR-29b-3p	hsa-miR-133a-3p	hsa-miR-32-5p	hsa-miR-124-3p	hsa-miR-192-5p	hsa-miR-335-5p	hsa-miR-224-5p
hsa00900_Terpenoid_backbone_biosynthesis	Pathways	hsa-miR-18a-5p	hsa-miR-215-5p	hsa-miR-96-5p	hsa-let-7e-5p	hsa-miR-193b-3p	hsa-miR-1260b	hsa-miR-1301-3p	hsa-miR-615-3p	hsa-miR-92a-3p	hsa-miR-30c-2-3p	hsa-miR-21-5p	hsa-miR-29c-3p	hsa-miR-148b-3p	hsa-miR-19b-3p	hsa-miR-186-5p	hsa-let-7a-5p	hsa-let-7b-5p	hsa-miR-769-3p	hsa-miR-98-5p	hsa-miR-769-5p	hsa-miR-23b-3p	hsa-miR-32-5p	hsa-miR-124-3p	hsa-miR-106b-5p	hsa-miR-192-5p	hsa-miR-3176	hsa-miR-335-5p	hsa-miR-320a	hsa-miR-26b-5p
hsa00072_Synthesis_and_degradation_of_ketone_bodies	Pathways	hsa-miR-18a-5p	hsa-miR-346	hsa-miR-1-3p	hsa-miR-100-5p	hsa-miR-96-5p	hsa-miR-1260b	hsa-miR-1301-3p	hsa-miR-92a-3p	hsa-miR-21-5p	hsa-miR-19b-3p	hsa-miR-766-3p	hsa-miR-186-5p	hsa-let-7b-5p	hsa-miR-769-3p	hsa-miR-23b-3p	hsa-miR-124-3p	hsa-miR-106b-5p	hsa-miR-192-5p	hsa-miR-3176	hsa-miR-155-5p	hsa-miR-335-5p	hsa-miR-375	hsa-miR-26b-5p
P02771_Pyrimidine_Metabolism	Pathways	hsa-miR-197-3p	hsa-miR-124-3p	hsa-miR-10a-5p	hsa-miR-26b-5p	hsa-miR-130b-5p	hsa-miR-19a-3p	hsa-miR-186-5p	hsa-miR-320e	hsa-miR-335-5p	hsa-miR-320a	hsa-miR-17-5p	hsa-miR-30c-5p	hsa-miR-425-5p	hsa-miR-375	hsa-let-7b-5p	hsa-miR-423-3p
WP34_Ovarian_Infertility_Genes	Pathways	hsa-miR-18a-5p	hsa-miR-125b-5p	hsa-miR-484	hsa-miR-7-5p	hsa-miR-9-5p	hsa-miR-34a-5p	hsa-miR-302a-3p	hsa-miR-221-3p	hsa-miR-3144-3p	hsa-miR-302d-3p	hsa-miR-1-3p	hsa-miR-215-5p	hsa-miR-25-3p	hsa-miR-877-5p	hsa-miR-100-5p	hsa-miR-218-5p	hsa-miR-877-3p	hsa-miR-31-5p	hsa-miR-16-5p	hsa-miR-15b-5p	hsa-miR-24-3p	hsa-miR-342-3p	hsa-miR-195-5p	hsa-miR-193b-3p	hsa-miR-1260b	hsa-miR-26a-5p	hsa-miR-1301-3p	hsa-miR-15a-5p	hsa-miR-615-3p	hsa-miR-196a-5p	hsa-miR-27b-3p	hsa-miR-302b-3p	hsa-miR-296-5p	hsa-miR-30a-5p	hsa-miR-92a-3p	hsa-miR-324-3p	hsa-miR-122-5p	hsa-miR-182-5p	hsa-miR-34c-5p	hsa-miR-590-3p	hsa-miR-21-5p	hsa-miR-126-3p	hsa-miR-449a	hsa-miR-148b-3p	hsa-miR-449b-5p	hsa-miR-19b-3p	hsa-miR-766-3p	hsa-miR-145-5p
WP179_Cell_cycle	Pathways	hsa-miR-125b-5p	hsa-miR-210-3p	hsa-miR-150-5p	hsa-miR-125a-5p	hsa-miR-675-5p	hsa-miR-130b-3p	hsa-miR-96-5p	hsa-miR-218-5p	hsa-miR-877-3p	hsa-miR-942-5p	hsa-miR-143-3p	hsa-miR-214-3p	hsa-miR-149-3p	hsa-miR-296-3p	hsa-miR-34c-5p	hsa-miR-22-3p	hsa-miR-26b-5p	hsa-miR-484	hsa-miR-615-3p	hsa-miR-885-5p	hsa-miR-196a-5p	hsa-miR-188-5p	hsa-miR-361-3p	hsa-miR-1229-3p	hsa-miR-92a-3p	hsa-miR-342-3p	hsa-miR-182-5p	hsa-miR-324-5p	hsa-miR-520b	hsa-miR-874-3p	hsa-miR-520h	hsa-miR-501-5p	hsa-miR-766-3p	hsa-miR-505-5p	hsa-miR-423-5p	hsa-miR-190a-5p	hsa-miR-181d-5p	hsa-miR-1296-5p	hsa-miR-519c-3p	hsa-miR-98-5p	hsa-let-7i-5p	hsa-miR-657	hsa-miR-92b-3p	hsa-miR-32-5p	hsa-miR-124-3p	hsa-miR-106b-5p	hsa-miR-1303	hsa-miR-744-5p
WP1434_Osteopontin_Signaling	Pathways	hsa-miR-9-5p	hsa-miR-28-5p	hsa-miR-497-5p	hsa-miR-210-3p	hsa-miR-215-5p	hsa-miR-30a-5p	hsa-miR-151a-3p	hsa-miR-96-5p	hsa-miR-424-5p	hsa-miR-218-5p	hsa-miR-30c-5p	hsa-miR-16-5p	hsa-miR-373-3p	hsa-miR-15b-5p	hsa-miR-7-5p	hsa-miR-146b-5p	hsa-miR-195-5p	hsa-miR-193b-3p	hsa-miR-26b-5p	hsa-miR-15a-5p	hsa-miR-93-3p	hsa-miR-92a-3p	hsa-miR-223-3p	hsa-miR-21-5p	hsa-miR-320b	hsa-miR-199a-5p	hsa-miR-483-5p	hsa-miR-338-3p	hsa-miR-34a-5p	hsa-miR-766-3p	hsa-miR-30e-5p	hsa-miR-199a-3p	hsa-let-7a-5p	hsa-miR-146a-5p	hsa-miR-181a-5p	hsa-let-7b-5p	hsa-miR-423-3p	hsa-miR-769-5p	hsa-miR-23b-3p	hsa-miR-128-3p	hsa-miR-92b-3p	hsa-miR-124-3p	hsa-miR-451a	hsa-miR-192-5p	hsa-miR-155-5p	hsa-miR-101-3p	hsa-miR-299-5p	hsa-miR-335-5p
P02775_Salvage_pyrimidine_ribonucleotides	Pathways	hsa-miR-590-3p	hsa-miR-326	hsa-miR-10a-5p	hsa-miR-192-5p	hsa-miR-26b-5p	hsa-miR-484	hsa-miR-361-5p	hsa-miR-34a-5p	hsa-miR-215-5p	hsa-miR-335-5p	hsa-miR-374b-5p	hsa-let-7a-5p	hsa-let-7b-5p	hsa-miR-16-5p
P00055_Transcription_regulation_by_bZIP_transcription_factor	Pathways	hsa-miR-132-3p	hsa-miR-203a-3p	hsa-miR-197-3p	hsa-miR-125b-5p	hsa-miR-150-5p	hsa-miR-130b-5p	hsa-miR-149-5p	hsa-miR-1-3p	hsa-miR-215-5p	hsa-miR-30a-3p	hsa-miR-30a-5p	hsa-miR-100-5p	hsa-miR-96-5p	hsa-miR-615-3p	hsa-miR-30d-5p	hsa-miR-25-3p	hsa-miR-33a-5p	hsa-miR-331-3p	hsa-let-7e-5p	hsa-miR-181a-5p	hsa-miR-590-3p	hsa-miR-99a-5p	hsa-miR-24-3p	hsa-miR-99a-3p	hsa-miR-193b-3p	hsa-miR-16-5p	hsa-miR-26b-5p	hsa-miR-484	hsa-miR-1301-3p	hsa-miR-15a-5p	hsa-miR-935	hsa-miR-339-5p	hsa-miR-429	hsa-miR-10a-5p	hsa-miR-17-5p	hsa-miR-92a-3p	hsa-miR-324-3p	hsa-miR-122-5p	hsa-miR-182-5p	hsa-miR-335-5p	hsa-miR-378a-5p	hsa-miR-21-5p	hsa-miR-7-5p	hsa-miR-200b-3p	hsa-miR-9-5p	hsa-miR-361-5p	hsa-miR-19b-3p	hsa-miR-140-5p
hsa04630_Jak_STAT_signaling_pathway	Pathways	hsa-miR-125b-5p	hsa-miR-29c-3p	hsa-miR-210-3p	hsa-miR-150-5p	hsa-miR-19b-1-5p	hsa-miR-130b-3p	hsa-miR-218-5p	hsa-miR-877-3p	hsa-miR-33a-5p	hsa-miR-143-3p	hsa-miR-149-3p	hsa-miR-296-3p	hsa-miR-34c-5p	hsa-miR-26b-5p	hsa-miR-484	hsa-miR-615-3p	hsa-miR-196a-5p	hsa-miR-1229-3p	hsa-miR-92a-3p	hsa-miR-342-3p	hsa-miR-182-5p	hsa-miR-324-5p	hsa-miR-409-3p	hsa-miR-520b	hsa-miR-125a-5p	hsa-miR-338-3p	hsa-miR-423-5p	hsa-miR-181d-5p	hsa-miR-324-3p	hsa-miR-98-5p	hsa-let-7i-5p	hsa-miR-92b-3p	hsa-miR-124-3p	hsa-miR-106b-5p	hsa-miR-181c-5p	hsa-miR-744-5p	hsa-miR-101-3p	hsa-miR-374a-5p	hsa-miR-503-5p	hsa-miR-200c-3p	hsa-miR-18a-3p	hsa-miR-10b-5p	hsa-miR-148a-3p	hsa-miR-302c-3p	hsa-miR-491-5p	hsa-miR-130b-5p	hsa-miR-625-5p	hsa-miR-30a-3p
hsa05412_Arrhythmogenic_right_ventricular_cardiomyopathy_ARVC	Pathways	hsa-miR-125b-5p	hsa-miR-19b-1-5p	hsa-let-7a-5p	hsa-miR-96-5p	hsa-miR-218-5p	hsa-miR-877-3p	hsa-miR-214-3p	hsa-miR-296-3p	hsa-miR-671-5p	hsa-miR-26b-5p	hsa-miR-484	hsa-miR-615-3p	hsa-miR-196a-5p	hsa-miR-1229-3p	hsa-miR-92a-3p	hsa-miR-342-3p	hsa-miR-182-5p	hsa-miR-324-5p	hsa-miR-204-5p	hsa-miR-532-3p	hsa-miR-423-5p	hsa-miR-98-5p	hsa-miR-92b-3p	hsa-miR-32-5p	hsa-miR-124-3p	hsa-miR-27b-5p	hsa-miR-744-5p	hsa-miR-200c-3p	hsa-miR-18a-3p	hsa-miR-9-3p	hsa-miR-30c-5p	hsa-miR-877-5p	hsa-miR-455-3p	hsa-miR-15b-5p	hsa-miR-7-5p	hsa-miR-1227-3p	hsa-miR-26a-5p	hsa-miR-429	hsa-miR-324-3p	hsa-miR-93-5p	hsa-miR-29a-3p	hsa-miR-326	hsa-miR-1307-3p	hsa-miR-652-3p	hsa-miR-148b-3p	hsa-miR-221-3p	hsa-miR-194-5p	hsa-miR-769-5p
P04374_5HT2_type_receptor_mediated_signaling_pathway	Pathways	hsa-miR-9-5p	hsa-miR-197-3p	hsa-miR-24-2-5p	hsa-miR-1-3p	hsa-miR-215-5p	hsa-miR-130b-3p	hsa-miR-30a-5p	hsa-miR-196b-5p	hsa-miR-96-5p	hsa-miR-30c-5p	hsa-miR-31-5p	hsa-miR-16-5p	hsa-miR-148a-3p	hsa-miR-423-5p	hsa-miR-7-5p	hsa-miR-1914-3p	hsa-miR-22-3p	hsa-miR-155-5p	hsa-miR-193b-3p	hsa-let-7e-5p	hsa-miR-26b-5p	hsa-miR-484	hsa-miR-615-3p	hsa-miR-331-3p	hsa-miR-205-5p	hsa-miR-505-3p	hsa-miR-142-3p	hsa-miR-92a-3p	hsa-miR-342-3p	hsa-miR-93-5p	hsa-miR-324-5p	hsa-miR-21-5p	hsa-miR-29c-3p	hsa-miR-505-5p	hsa-miR-34a-5p	hsa-miR-186-5p	hsa-miR-128-3p	hsa-miR-19b-3p	hsa-miR-17-5p	hsa-let-7b-5p	hsa-miR-181a-5p	hsa-miR-98-5p	hsa-miR-17-3p	hsa-miR-133a-3p	hsa-miR-92b-3p	hsa-miR-124-3p	hsa-miR-192-5p	hsa-miR-589-3p
WP262_EBV_LMP1_signaling	Pathways	hsa-miR-132-3p	hsa-miR-9-5p	hsa-miR-26a-5p	hsa-miR-28-5p	hsa-miR-203a-3p	hsa-miR-210-3p	hsa-miR-218-5p	hsa-miR-125a-5p	hsa-miR-1-3p	hsa-miR-215-5p	hsa-miR-25-3p	hsa-miR-30a-5p	hsa-miR-151a-3p	hsa-miR-96-5p	hsa-miR-328-3p	hsa-let-7b-5p	hsa-miR-30c-5p	hsa-miR-33a-5p	hsa-miR-16-5p	hsa-miR-214-3p	hsa-miR-15b-5p	hsa-miR-7-5p	hsa-miR-222-3p	hsa-miR-195-5p	hsa-miR-330-5p	hsa-miR-146b-5p	hsa-miR-193b-3p	hsa-miR-760	hsa-miR-484	hsa-miR-15a-5p	hsa-miR-204-5p	hsa-miR-93-3p	hsa-miR-1226-5p	hsa-miR-199a-3p	hsa-miR-421	hsa-miR-324-3p	hsa-let-7a-5p	hsa-miR-223-3p	hsa-miR-103a-3p	hsa-miR-21-5p	hsa-miR-199a-5p	hsa-miR-10a-5p	hsa-miR-140-3p	hsa-miR-3943	hsa-miR-501-5p	hsa-miR-92a-3p	hsa-miR-34a-5p	hsa-miR-766-3p
WP51_Regulation_of_Actin_Cytoskeleton	Pathways	hsa-miR-125b-5p	hsa-miR-559	hsa-miR-210-3p	hsa-miR-125a-5p	hsa-miR-941	hsa-let-7a-5p	hsa-miR-96-5p	hsa-miR-218-5p	hsa-miR-877-3p	hsa-miR-143-3p	hsa-miR-18a-5p	hsa-miR-296-3p	hsa-miR-373-3p	hsa-miR-26b-5p	hsa-miR-484	hsa-miR-615-3p	hsa-miR-497-5p	hsa-miR-196a-5p	hsa-miR-1229-3p	hsa-miR-92a-3p	hsa-miR-342-3p	hsa-miR-124-3p	hsa-miR-182-5p	hsa-miR-324-5p	hsa-miR-1224-5p	hsa-miR-19b-1-5p	hsa-miR-766-3p	hsa-miR-423-5p	hsa-miR-199a-3p	hsa-miR-500a-3p	hsa-miR-98-5p	hsa-let-7i-5p	hsa-miR-92b-3p	hsa-miR-32-5p	hsa-miR-644a	hsa-miR-106b-5p	hsa-miR-1303	hsa-miR-129-1-3p	hsa-miR-744-5p	hsa-miR-101-3p	hsa-miR-503-5p	hsa-miR-200c-3p	hsa-miR-18a-3p	hsa-miR-193a-3p	hsa-miR-328-3p	hsa-miR-181c-5p	hsa-miR-130b-5p	hsa-miR-542-5p
hsa00650_Butanoate_metabolism	Pathways	hsa-miR-18a-5p	hsa-miR-9-5p	hsa-miR-497-5p	hsa-miR-152-3p	hsa-miR-130b-5p	hsa-miR-346	hsa-miR-1-3p	hsa-miR-215-5p	hsa-let-7a-5p	hsa-miR-877-5p	hsa-miR-100-5p	hsa-miR-96-5p	hsa-miR-328-3p	hsa-miR-877-3p	hsa-miR-191-5p	hsa-miR-3176	hsa-miR-16-5p	hsa-miR-15b-5p	hsa-miR-7-5p	hsa-miR-22-3p	hsa-miR-193b-3p	hsa-miR-26b-5p	hsa-miR-484	hsa-miR-1301-3p	hsa-miR-615-3p	hsa-miR-92a-3p	hsa-miR-122-5p	hsa-miR-21-5p	hsa-miR-326	hsa-miR-34a-5p	hsa-miR-766-3p	hsa-miR-145-5p	hsa-miR-186-5p	hsa-miR-24-3p	hsa-miR-19b-3p	hsa-miR-1226-3p	hsa-let-7b-5p	hsa-miR-769-3p	hsa-miR-98-5p	hsa-miR-23b-3p	hsa-miR-128-3p	hsa-miR-124-3p	hsa-miR-106b-5p	hsa-miR-192-5p	hsa-miR-20a-5p	hsa-miR-30c-5p	hsa-let-7f-5p	hsa-miR-27a-3p
P02770_Pyridoxal_phosphate_salvage_pathway	Pathways	hsa-miR-18a-5p	hsa-miR-24-3p	hsa-miR-193b-3p	hsa-miR-760	hsa-miR-484	hsa-miR-744-5p	hsa-miR-30a-5p	hsa-miR-92a-3p	hsa-miR-16-5p
WP2059_Alzheimers_Disease	Pathways	hsa-miR-125b-5p	hsa-miR-150-5p	hsa-miR-19b-1-5p	hsa-let-7a-5p	hsa-miR-96-5p	hsa-miR-877-3p	hsa-miR-214-3p	hsa-miR-296-3p	hsa-miR-34c-5p	hsa-miR-26b-5p	hsa-miR-484	hsa-miR-615-3p	hsa-miR-196a-5p	hsa-miR-92a-3p	hsa-miR-324-5p	hsa-miR-320b	hsa-miR-125a-5p	hsa-miR-532-3p	hsa-miR-766-3p	hsa-miR-423-5p	hsa-miR-199a-3p	hsa-miR-30d-5p	hsa-miR-98-5p	hsa-miR-92b-3p	hsa-miR-32-5p	hsa-miR-124-3p	hsa-miR-106b-5p	hsa-miR-644a	hsa-miR-101-3p	hsa-miR-503-5p	hsa-miR-10b-5p	hsa-miR-545-3p	hsa-miR-30c-5p	hsa-miR-30a-5p	hsa-miR-1285-3p	hsa-miR-148a-3p	hsa-miR-15b-5p	hsa-miR-7-5p	hsa-miR-1260b	hsa-miR-26a-5p	hsa-miR-15a-5p	hsa-miR-3620-3p	hsa-miR-324-3p	hsa-miR-93-5p	hsa-miR-29a-3p	hsa-miR-148b-3p	hsa-miR-483-5p	hsa-miR-221-3p
hsa00630_Glyoxylate_and_dicarboxylate_metabolism	Pathways	hsa-miR-28-5p	hsa-miR-1180-3p	hsa-miR-887-3p	hsa-miR-1-3p	hsa-miR-877-5p	hsa-miR-96-5p	hsa-miR-30d-5p	hsa-miR-16-5p	hsa-miR-15b-5p	hsa-miR-222-3p	hsa-miR-155-5p	hsa-miR-193b-3p	hsa-miR-26b-5p	hsa-miR-484	hsa-miR-1301-3p	hsa-miR-615-3p	hsa-miR-421	hsa-miR-93-5p	hsa-miR-324-5p	hsa-miR-29c-3p	hsa-miR-186-5p	hsa-miR-30e-5p	hsa-let-7a-5p	hsa-let-7b-5p	hsa-miR-940	hsa-miR-92b-3p	hsa-miR-17-3p	hsa-miR-106b-5p	hsa-miR-183-5p	hsa-let-7a-3p	hsa-miR-744-5p	hsa-miR-320a	hsa-miR-27b-3p	hsa-miR-425-3p
hsa04620_Toll_like_receptor_signaling_pathway	Pathways	hsa-miR-125b-5p	hsa-miR-210-3p	hsa-miR-19b-1-5p	hsa-let-7a-5p	hsa-miR-96-5p	hsa-miR-218-5p	hsa-miR-877-3p	hsa-miR-33a-5p	hsa-miR-143-3p	hsa-miR-214-3p	hsa-miR-149-3p	hsa-miR-296-3p	hsa-miR-22-3p	hsa-miR-26b-5p	hsa-miR-484	hsa-miR-204-5p	hsa-miR-497-5p	hsa-miR-196a-5p	hsa-miR-92a-3p	hsa-miR-342-3p	hsa-miR-324-5p	hsa-miR-486-5p	hsa-miR-320b	hsa-miR-125a-5p	hsa-miR-615-3p	hsa-miR-766-3p	hsa-miR-199a-3p	hsa-miR-30d-5p	hsa-miR-98-5p	hsa-let-7i-5p	hsa-miR-92b-3p	hsa-miR-124-3p	hsa-miR-106b-5p	hsa-miR-744-5p	hsa-miR-101-3p	hsa-miR-151a-3p	hsa-miR-200c-3p	hsa-miR-18a-3p	hsa-miR-10b-5p	hsa-miR-302c-3p	hsa-miR-105-5p	hsa-miR-30a-5p	hsa-miR-15b-5p	hsa-miR-24-3p	hsa-miR-26a-5p	hsa-miR-15a-5p	hsa-miR-296-5p	hsa-miR-421
P00028_Heterotrimeric_G_protein_signaling_pathway_rod_outer_segment_phototransduction	Pathways	hsa-miR-598-3p	hsa-miR-1-3p	hsa-miR-130b-3p	hsa-miR-30a-5p	hsa-miR-100-5p	hsa-let-7e-5p	hsa-miR-148a-3p	hsa-miR-7-5p	hsa-miR-365a-3p	hsa-miR-22-3p	hsa-miR-155-5p	hsa-miR-16-5p	hsa-miR-26b-5p	hsa-miR-484	hsa-miR-331-3p	hsa-miR-93-5p	hsa-miR-324-5p	hsa-miR-21-5p	hsa-miR-29c-3p	hsa-miR-148b-3p	hsa-miR-19b-3p	hsa-miR-186-5p	hsa-miR-423-5p	hsa-miR-17-5p	hsa-let-7b-5p	hsa-miR-98-5p	hsa-miR-128-3p	hsa-miR-92b-3p	hsa-miR-124-3p	hsa-miR-589-3p	hsa-miR-27b-3p	hsa-miR-27a-3p	hsa-miR-744-5p	hsa-miR-101-3p	hsa-miR-196b-5p	hsa-miR-23a-3p	hsa-miR-335-5p	hsa-miR-320a	hsa-miR-425-5p	hsa-miR-106a-5p	hsa-miR-103a-3p
P00044_Nicotinic_acetylcholine_receptor_signaling_pathway	Pathways	hsa-miR-125b-5p	hsa-miR-210-3p	hsa-let-7a-5p	hsa-miR-877-3p	hsa-miR-143-3p	hsa-miR-373-3p	hsa-miR-26b-5p	hsa-miR-484	hsa-miR-615-3p	hsa-miR-196a-5p	hsa-miR-92a-3p	hsa-miR-342-3p	hsa-miR-324-5p	hsa-miR-423-5p	hsa-miR-1296-5p	hsa-miR-98-5p	hsa-miR-92b-3p	hsa-miR-32-5p	hsa-miR-124-3p	hsa-miR-644a	hsa-miR-744-5p	hsa-miR-101-3p	hsa-miR-18a-3p	hsa-miR-877-5p	hsa-miR-455-3p	hsa-miR-7-5p	hsa-miR-1227-3p	hsa-miR-1260b	hsa-miR-26a-5p	hsa-miR-15a-5p	hsa-miR-324-3p	hsa-miR-93-5p	hsa-miR-326	hsa-miR-1307-3p	hsa-miR-652-3p	hsa-miR-221-3p	hsa-miR-19b-3p	hsa-miR-22-3p	hsa-miR-133a-3p	hsa-miR-335-5p	hsa-miR-320a	hsa-miR-132-3p	hsa-miR-99b-3p	hsa-miR-1180-3p	hsa-miR-10b-5p	hsa-miR-31-5p	hsa-miR-16-5p	hsa-miR-181a-5p
P00004_Alzheimer_disease_presenilin_pathway	Pathways	hsa-miR-18a-5p	hsa-miR-125b-5p	hsa-miR-150-5p	hsa-let-7a-5p	hsa-miR-877-3p	hsa-miR-143-3p	hsa-miR-214-3p	hsa-miR-429	hsa-miR-296-3p	hsa-miR-34c-5p	hsa-miR-373-3p	hsa-miR-26b-5p	hsa-miR-484	hsa-miR-107	hsa-miR-615-3p	hsa-miR-196a-5p	hsa-miR-146b-5p	hsa-miR-92a-3p	hsa-miR-342-3p	hsa-miR-324-5p	hsa-miR-532-3p	hsa-miR-766-3p	hsa-miR-423-5p	hsa-miR-199a-3p	hsa-miR-144-3p	hsa-miR-98-5p	hsa-miR-124-3p	hsa-miR-106b-5p	hsa-miR-644a	hsa-miR-181c-5p	hsa-miR-744-5p	hsa-miR-101-3p	hsa-miR-200c-3p	hsa-miR-18a-3p	hsa-miR-328-3p	hsa-miR-545-3p	hsa-miR-130b-5p	hsa-miR-30c-5p	hsa-miR-877-5p	hsa-miR-455-3p	hsa-miR-15b-5p	hsa-miR-129-5p	hsa-miR-7-5p	hsa-miR-1227-3p	hsa-miR-1260b	hsa-miR-26a-5p	hsa-miR-15a-5p	hsa-miR-3620-3p
hsa00601_Glycosphingolipid_biosynthesis___lacto_and_neolacto_series	Pathways	hsa-miR-132-3p	hsa-miR-125b-5p	hsa-miR-1180-3p	hsa-miR-1-3p	hsa-miR-215-5p	hsa-miR-96-5p	hsa-miR-10b-5p	hsa-miR-30c-5p	hsa-miR-16-5p	hsa-miR-18a-5p	hsa-miR-15b-5p	hsa-miR-26b-5p	hsa-miR-484	hsa-miR-30b-5p	hsa-miR-92a-3p	hsa-miR-122-5p	hsa-miR-21-5p	hsa-miR-10a-5p	hsa-miR-34a-5p	hsa-miR-221-3p	hsa-miR-199a-3p	hsa-miR-98-5p	hsa-miR-128-3p	hsa-miR-124-3p	hsa-miR-192-5p	hsa-miR-20a-5p	hsa-miR-155-5p	hsa-miR-335-5p
WP673_ErbB_signaling_pathway	Pathways	hsa-miR-125b-5p	hsa-miR-559	hsa-miR-125a-5p	hsa-miR-15a-5p	hsa-miR-96-5p	hsa-miR-218-5p	hsa-miR-877-3p	hsa-miR-942-5p	hsa-miR-143-3p	hsa-miR-214-3p	hsa-miR-34c-5p	hsa-miR-22-3p	hsa-miR-26b-5p	hsa-miR-484	hsa-miR-615-3p	hsa-miR-196a-5p	hsa-miR-302a-3p	hsa-miR-92a-3p	hsa-miR-342-3p	hsa-miR-182-5p	hsa-miR-1914-3p	hsa-miR-520b	hsa-miR-520h	hsa-miR-766-3p	hsa-miR-421	hsa-miR-423-5p	hsa-miR-190a-5p	hsa-miR-181d-5p	hsa-miR-199a-3p	hsa-miR-519c-3p	hsa-miR-144-3p	hsa-miR-98-5p	hsa-miR-657	hsa-miR-92b-3p	hsa-miR-124-3p	hsa-miR-106b-5p	hsa-miR-129-1-3p	hsa-miR-199b-5p	hsa-miR-744-5p	hsa-miR-372-3p	hsa-miR-503-5p	hsa-miR-18a-3p	hsa-miR-193a-3p	hsa-miR-520a-3p	hsa-miR-542-5p	hsa-miR-30a-5p	hsa-miR-33a-5p	hsa-miR-15b-5p
P00017_DNA_replication	Pathways	hsa-miR-18a-5p	hsa-miR-708-5p	hsa-miR-484	hsa-miR-197-3p	hsa-miR-9-5p	hsa-miR-497-5p	hsa-miR-1229-3p	hsa-miR-221-3p	hsa-miR-1-3p	hsa-miR-215-5p	hsa-miR-130b-3p	hsa-miR-30a-5p	hsa-miR-100-5p	hsa-miR-330-3p	hsa-let-7e-5p	hsa-miR-769-3p	hsa-miR-15b-5p	hsa-miR-24-3p	hsa-miR-222-3p	hsa-miR-22-3p	hsa-miR-193b-3p	hsa-miR-16-5p	hsa-miR-26b-5p	hsa-miR-20a-5p	hsa-miR-15a-5p	hsa-miR-615-3p	hsa-miR-331-3p	hsa-miR-93-3p	hsa-miR-361-3p	hsa-miR-92a-3p	hsa-miR-378a-3p	hsa-miR-93-5p	hsa-miR-324-5p	hsa-miR-21-5p	hsa-miR-320b	hsa-miR-652-3p	hsa-miR-34a-5p	hsa-miR-186-5p	hsa-miR-194-5p	hsa-miR-7-5p	hsa-miR-19b-3p	hsa-miR-877-5p	hsa-miR-17-5p	hsa-miR-1226-3p	hsa-let-7b-5p	hsa-miR-181a-5p	hsa-miR-3909	hsa-miR-98-5p
hsa05215_Prostate_cancer	Pathways	hsa-miR-125b-5p	hsa-miR-513a-3p	hsa-miR-559	hsa-miR-210-3p	hsa-miR-150-5p	hsa-miR-199a-3p	hsa-miR-24-2-5p	hsa-miR-675-5p	hsa-miR-1226-3p	hsa-miR-96-5p	hsa-miR-218-5p	hsa-miR-877-3p	hsa-miR-942-5p	hsa-miR-143-3p	hsa-miR-214-3p	hsa-miR-149-3p	hsa-miR-296-3p	hsa-miR-34c-5p	hsa-miR-22-3p	hsa-miR-26b-5p	hsa-miR-484	hsa-miR-204-5p	hsa-miR-885-5p	hsa-miR-501-5p	hsa-miR-497-5p	hsa-miR-196a-5p	hsa-miR-1229-3p	hsa-miR-92a-3p	hsa-miR-342-3p	hsa-miR-182-5p	hsa-miR-324-5p	hsa-miR-520b	hsa-miR-373-3p	hsa-miR-19b-1-5p	hsa-miR-615-3p	hsa-miR-338-3p	hsa-miR-766-3p	hsa-miR-320b	hsa-miR-421	hsa-miR-423-5p	hsa-miR-190a-5p	hsa-miR-181d-5p	hsa-miR-324-3p	hsa-miR-519c-3p	hsa-miR-144-3p	hsa-miR-98-5p	hsa-miR-657	hsa-miR-320a
P02724_Alanine_biosynthesis	Pathways	hsa-miR-769-5p	hsa-miR-21-5p	hsa-miR-32-5p	hsa-miR-484	hsa-miR-615-3p	hsa-miR-155-5p	hsa-let-7a-5p	hsa-let-7b-5p
hsa04080_Neuroactive_ligand_receptor_interaction	Pathways	hsa-miR-18a-5p	hsa-miR-9-5p	hsa-miR-203a-3p	hsa-miR-150-5p	hsa-miR-1-3p	hsa-miR-215-5p	hsa-miR-130b-3p	hsa-miR-877-5p	hsa-miR-196b-5p	hsa-miR-96-5p	hsa-miR-10b-5p	hsa-miR-877-3p	hsa-miR-16-5p	hsa-miR-148a-3p	hsa-miR-590-3p	hsa-miR-99a-5p	hsa-miR-186-5p	hsa-miR-296-3p	hsa-miR-22-3p	hsa-miR-93-3p	hsa-miR-744-5p	hsa-let-7e-5p	hsa-miR-26b-5p	hsa-miR-484	hsa-miR-204-5p	hsa-miR-10a-5p	hsa-miR-196a-5p	hsa-miR-142-3p	hsa-miR-421	hsa-miR-15b-5p	hsa-miR-21-5p	hsa-miR-125b-5p	hsa-miR-148b-3p	hsa-miR-19b-3p	hsa-miR-483-3p	hsa-miR-200c-3p	hsa-miR-504-5p	hsa-miR-34a-5p	hsa-let-7a-5p	hsa-let-7b-5p	hsa-miR-181a-5p	hsa-miR-181b-5p	hsa-miR-98-5p	hsa-miR-128-3p	hsa-miR-17-3p	hsa-miR-32-5p	hsa-miR-124-3p	hsa-miR-106b-5p
P00013_Cell_cycle	Pathways	hsa-miR-132-3p	hsa-miR-9-5p	hsa-miR-302c-3p	hsa-miR-7-5p	hsa-miR-125b-5p	hsa-miR-302a-3p	hsa-miR-221-3p	hsa-miR-19b-1-5p	hsa-miR-302d-3p	hsa-miR-1-3p	hsa-miR-215-5p	hsa-miR-877-5p	hsa-miR-151a-3p	hsa-miR-10b-5p	hsa-miR-877-3p	hsa-miR-1236-3p	hsa-miR-331-3p	hsa-miR-16-5p	hsa-miR-93-3p	hsa-miR-15b-5p	hsa-miR-124-3p	hsa-miR-365a-3p	hsa-miR-195-5p	hsa-miR-744-5p	hsa-miR-193b-3p	hsa-miR-374b-5p	hsa-miR-26b-5p	hsa-miR-26a-5p	hsa-miR-15a-5p	hsa-miR-615-3p	hsa-miR-19a-3p	hsa-miR-107	hsa-miR-196a-5p	hsa-miR-301a-3p	hsa-miR-296-5p	hsa-miR-760	hsa-miR-142-3p	hsa-miR-92a-3p	hsa-miR-302b-3p	hsa-miR-93-5p	hsa-miR-182-5p	hsa-miR-324-5p	hsa-miR-769-5p	hsa-miR-520b	hsa-miR-449a	hsa-miR-23b-3p	hsa-miR-10a-5p	hsa-miR-138-5p
WP732_Serotonin_Receptor_2_and_ELK_SRF_GATA4_signaling	Pathways	hsa-miR-125b-5p	hsa-miR-497-5p	hsa-miR-1229-3p	hsa-miR-1-3p	hsa-miR-30c-5p	hsa-miR-340-5p	hsa-miR-7-5p	hsa-miR-22-3p	hsa-miR-193b-3p	hsa-miR-26b-5p	hsa-miR-484	hsa-miR-615-3p	hsa-miR-331-3p	hsa-miR-93-3p	hsa-miR-142-3p	hsa-miR-92a-3p	hsa-miR-324-3p	hsa-miR-122-5p	hsa-miR-320b	hsa-miR-21-5p	hsa-miR-320a	hsa-miR-200b-3p	hsa-miR-483-5p	hsa-miR-34a-5p	hsa-miR-186-5p	hsa-let-7b-5p	hsa-miR-181a-5p	hsa-miR-23b-3p	hsa-miR-128-3p	hsa-miR-423-3p	hsa-miR-32-5p	hsa-miR-124-3p	hsa-miR-101-3p	hsa-miR-335-5p	hsa-miR-424-5p	hsa-miR-18a-3p	hsa-miR-324-5p
WP710_DNA_damage_response_only_ATM_dependent	Pathways	hsa-miR-125b-5p	hsa-miR-559	hsa-miR-210-3p	hsa-miR-150-5p	hsa-miR-24-2-5p	hsa-miR-193a-5p	hsa-miR-1226-3p	hsa-miR-96-5p	hsa-miR-519c-3p	hsa-miR-877-3p	hsa-miR-942-5p	hsa-miR-143-3p	hsa-miR-214-3p	hsa-miR-26b-3p	hsa-miR-34c-5p	hsa-miR-22-3p	hsa-miR-26b-5p	hsa-miR-484	hsa-miR-204-5p	hsa-miR-196a-5p	hsa-miR-1229-3p	hsa-miR-92a-3p	hsa-miR-342-3p	hsa-miR-182-5p	hsa-miR-324-5p	hsa-miR-520b	hsa-miR-218-5p	hsa-miR-125a-5p	hsa-miR-338-3p	hsa-miR-483-3p	hsa-miR-505-5p	hsa-miR-423-5p	hsa-miR-190a-5p	hsa-miR-181d-5p	hsa-miR-199a-3p	hsa-miR-363-3p	hsa-miR-144-3p	hsa-miR-98-5p	hsa-miR-657	hsa-miR-92b-3p	hsa-miR-454-3p	hsa-miR-124-3p	hsa-miR-106b-5p	hsa-miR-766-3p	hsa-miR-181c-5p	hsa-miR-199b-5p	hsa-miR-744-5p	hsa-miR-101-3p
WP534_Glycolysis_and_Gluconeogenesis	Pathways	hsa-miR-125b-5p	hsa-miR-17-5p	hsa-miR-125a-5p	hsa-miR-96-5p	hsa-miR-877-3p	hsa-miR-33a-5p	hsa-miR-143-3p	hsa-miR-296-3p	hsa-miR-22-3p	hsa-miR-26b-5p	hsa-miR-484	hsa-miR-204-5p	hsa-miR-196a-5p	hsa-miR-1180-3p	hsa-miR-92a-3p	hsa-miR-342-3p	hsa-miR-324-5p	hsa-miR-520b	hsa-miR-520e	hsa-miR-615-3p	hsa-miR-501-5p	hsa-miR-766-3p	hsa-miR-423-5p	hsa-miR-181d-5p	hsa-miR-324-3p	hsa-miR-1262	hsa-miR-98-5p	hsa-miR-92b-3p	hsa-miR-124-3p	hsa-miR-644a	hsa-miR-744-5p	hsa-miR-92a-1-5p	hsa-miR-18a-3p	hsa-miR-223-3p	hsa-miR-328-3p	hsa-miR-520a-3p	hsa-miR-3177-3p	hsa-miR-130b-5p	hsa-miR-30c-5p	hsa-miR-30a-5p	hsa-miR-455-3p	hsa-miR-148a-3p	hsa-miR-15b-5p	hsa-miR-99a-5p	hsa-miR-24-3p	hsa-miR-1260b	hsa-miR-15a-5p	hsa-miR-1296-5p
P05726_2_arachidonoylglycerol_biosynthesis	Pathways	hsa-miR-197-3p	hsa-miR-155-5p	hsa-miR-138-5p	hsa-miR-26b-5p	hsa-miR-1-3p	hsa-miR-148b-3p	hsa-miR-423-5p	hsa-miR-30c-5p	hsa-let-7b-5p	hsa-miR-29a-3p
hsa00053_Ascorbate_and_aldarate_metabolism	Pathways	hsa-miR-9-5p	hsa-miR-497-5p	hsa-miR-130b-5p	hsa-miR-1-3p	hsa-miR-215-5p	hsa-miR-1226-3p	hsa-miR-30a-5p	hsa-miR-100-5p	hsa-miR-328-3p	hsa-miR-16-5p	hsa-miR-7-5p	hsa-miR-193b-3p	hsa-miR-26b-5p	hsa-miR-15a-5p	hsa-miR-615-3p	hsa-miR-142-3p	hsa-miR-92a-3p	hsa-miR-34a-5p	hsa-miR-186-5p	hsa-miR-24-3p	hsa-let-7a-5p	hsa-let-7b-5p	hsa-miR-128-3p	hsa-miR-124-3p	hsa-miR-192-5p	hsa-miR-27a-3p	hsa-miR-155-5p	hsa-miR-99b-5p	hsa-miR-335-5p	hsa-let-7f-5p
hsa03050_Proteasome	Pathways	hsa-miR-132-3p	hsa-miR-125b-5p	hsa-miR-484	hsa-miR-1303	hsa-miR-1229-3p	hsa-miR-149-5p	hsa-miR-1236-3p	hsa-miR-215-5p	hsa-miR-1226-3p	hsa-miR-877-5p	hsa-miR-100-5p	hsa-miR-96-5p	hsa-miR-10b-5p	hsa-miR-25-3p	hsa-miR-191-5p	hsa-miR-877-3p	hsa-let-7e-5p	hsa-miR-93-3p	hsa-miR-18a-5p	hsa-miR-192-5p	hsa-miR-15b-5p	hsa-miR-99a-5p	hsa-miR-423-5p	hsa-miR-24-3p	hsa-miR-222-3p	hsa-miR-769-5p	hsa-miR-193b-3p	hsa-miR-16-5p	hsa-miR-26b-5p	hsa-miR-26a-5p	hsa-miR-15a-5p	hsa-miR-615-3p	hsa-miR-331-3p	hsa-miR-200a-3p	hsa-miR-196a-5p	hsa-miR-98-5p	hsa-miR-185-3p	hsa-miR-142-3p	hsa-miR-92a-3p	hsa-miR-324-3p	hsa-miR-93-5p	hsa-miR-155-5p	hsa-miR-324-5p	hsa-miR-409-3p	hsa-miR-346	hsa-miR-29c-3p	hsa-miR-7-5p	hsa-miR-10a-5p
WP2012_miRs_in_Muscle_Cell_Differentiation	Pathways	hsa-miR-132-3p	hsa-miR-9-5p	hsa-miR-26a-5p	hsa-miR-197-3p	hsa-miR-24-2-5p	hsa-miR-1-3p	hsa-miR-215-5p	hsa-miR-30a-3p	hsa-miR-877-5p	hsa-miR-196b-5p	hsa-miR-96-5p	hsa-miR-615-3p	hsa-let-7b-5p	hsa-miR-25-3p	hsa-miR-31-5p	hsa-miR-16-5p	hsa-miR-214-3p	hsa-miR-590-3p	hsa-miR-99a-5p	hsa-miR-365a-3p	hsa-miR-22-3p	hsa-miR-744-5p	hsa-miR-193b-3p	hsa-miR-324-3p	hsa-miR-26b-5p	hsa-miR-484	hsa-miR-204-5p	hsa-miR-331-3p	hsa-miR-217	hsa-miR-505-3p	hsa-miR-92a-3p	hsa-miR-1296-5p	hsa-miR-93-5p	hsa-miR-223-3p	hsa-miR-21-5p	hsa-miR-1260b	hsa-miR-199a-5p	hsa-miR-148b-3p	hsa-miR-205-5p	hsa-miR-19b-3p	hsa-miR-505-5p	hsa-miR-17-5p	hsa-let-7a-5p	hsa-miR-30d-5p	hsa-miR-769-3p	hsa-miR-98-5p	hsa-miR-17-3p	hsa-miR-122-5p
hsa04672_Intestinal_immune_network_for_IgA_production	Pathways	hsa-miR-132-3p	hsa-miR-484	hsa-miR-192-5p	hsa-miR-150-5p	hsa-miR-21-5p	hsa-miR-1-3p	hsa-miR-215-5p	hsa-miR-877-3p	hsa-miR-30c-5p	hsa-miR-31-5p	hsa-miR-24-3p	hsa-miR-365a-3p	hsa-miR-744-5p	hsa-miR-454-5p	hsa-miR-26b-5p	hsa-miR-26a-5p	hsa-miR-122-5p	hsa-miR-486-5p	hsa-miR-148b-3p	hsa-miR-766-3p	hsa-let-7a-5p	hsa-miR-146a-5p	hsa-miR-98-5p	hsa-miR-124-3p	hsa-miR-181c-5p	hsa-miR-155-5p	hsa-miR-633	hsa-miR-23a-3p	hsa-miR-335-5p	hsa-miR-224-5p	hsa-miR-126-3p	hsa-miR-375	hsa-miR-106a-5p	hsa-miR-126-5p
WP288_NLR_proteins	Pathways	hsa-miR-125a-5p	hsa-miR-877-5p	hsa-miR-151a-3p	hsa-miR-141-3p	hsa-miR-218-5p	hsa-miR-877-3p	hsa-miR-33a-5p	hsa-miR-16-5p	hsa-miR-214-3p	hsa-miR-195-5p	hsa-miR-193b-3p	hsa-miR-26b-5p	hsa-miR-15a-5p	hsa-miR-429	hsa-miR-92a-3p	hsa-miR-223-3p	hsa-miR-486-5p	hsa-miR-199a-5p	hsa-miR-200b-3p	hsa-miR-10a-5p	hsa-miR-140-3p	hsa-miR-34a-5p	hsa-miR-200c-3p	hsa-miR-1226-5p	hsa-miR-23b-3p	hsa-miR-32-5p	hsa-miR-200a-3p	hsa-miR-155-5p	hsa-miR-335-5p	hsa-miR-224-5p	hsa-miR-421	hsa-miR-103a-3p
WP183_Proteasome_Degradation	Pathways	hsa-miR-125b-5p	hsa-miR-210-3p	hsa-let-7a-5p	hsa-miR-877-3p	hsa-miR-1287-5p	hsa-miR-214-3p	hsa-miR-18a-5p	hsa-miR-296-3p	hsa-miR-26b-5p	hsa-miR-484	hsa-miR-615-3p	hsa-miR-196a-5p	hsa-miR-188-5p	hsa-miR-185-3p	hsa-miR-1180-3p	hsa-miR-92a-3p	hsa-miR-182-5p	hsa-miR-324-5p	hsa-miR-409-3p	hsa-miR-148b-5p	hsa-miR-423-5p	hsa-miR-30d-5p	hsa-miR-98-5p	hsa-miR-92b-3p	hsa-miR-124-3p	hsa-miR-106b-5p	hsa-miR-744-5p	hsa-miR-101-3p	hsa-miR-92a-1-5p	hsa-miR-18a-3p	hsa-miR-10b-5p	hsa-miR-25-3p	hsa-miR-877-5p	hsa-miR-148a-3p	hsa-miR-15b-5p	hsa-miR-99a-5p	hsa-miR-24-3p	hsa-miR-26a-5p	hsa-miR-15a-5p	hsa-miR-421	hsa-miR-324-3p	hsa-miR-93-5p	hsa-miR-148b-3p	hsa-miR-221-3p	hsa-miR-34a-5p	hsa-miR-940	hsa-miR-29b-3p	hsa-miR-769-5p
P00054_Toll_receptor_signaling_pathway	Pathways	hsa-miR-125b-5p	hsa-miR-3934-5p	hsa-miR-186-3p	hsa-miR-125a-5p	hsa-miR-1226-3p	hsa-miR-96-5p	hsa-miR-218-5p	hsa-miR-33a-5p	hsa-miR-143-3p	hsa-miR-214-3p	hsa-miR-296-3p	hsa-miR-373-3p	hsa-miR-26b-5p	hsa-miR-92a-3p	hsa-miR-342-3p	hsa-miR-324-5p	hsa-miR-140-3p	hsa-miR-423-5p	hsa-miR-199a-3p	hsa-miR-30d-5p	hsa-miR-98-5p	hsa-let-7i-5p	hsa-miR-124-3p	hsa-miR-106b-5p	hsa-miR-744-5p	hsa-miR-101-3p	hsa-miR-200c-3p	hsa-miR-105-5p	hsa-miR-30a-5p	hsa-miR-30e-3p	hsa-miR-99a-5p	hsa-miR-7-5p	hsa-miR-26a-5p	hsa-miR-15a-5p	hsa-miR-296-5p	hsa-miR-421	hsa-miR-93-5p	hsa-miR-29a-3p	hsa-miR-335-5p	hsa-miR-137	hsa-miR-652-3p	hsa-miR-483-5p	hsa-miR-221-3p	hsa-miR-19b-3p	hsa-miR-146a-5p	hsa-miR-1226-5p	hsa-miR-23b-3p	hsa-miR-423-3p
P06587_Nicotine_pharmacodynamics_pathway	Pathways	hsa-miR-132-3p	hsa-miR-133a-3p	hsa-miR-222-3p	hsa-miR-124-3p	hsa-miR-10a-5p	hsa-miR-1229-3p	hsa-miR-26b-5p	hsa-miR-34a-5p	hsa-miR-615-3p	hsa-miR-1-3p	hsa-miR-155-5p	hsa-miR-335-5p	hsa-miR-17-5p	hsa-miR-331-3p
hsa00130_Ubiquinone_and_other_terpenoid_quinone_biosynthesis	Pathways	hsa-miR-99a-5p	hsa-miR-26b-5p	hsa-miR-192-5p	hsa-miR-1-3p	hsa-miR-215-5p	hsa-miR-423-5p	hsa-miR-93-5p	hsa-miR-16-5p
hsa00590_Arachidonic_acid_metabolism	Pathways	hsa-miR-132-3p	hsa-miR-125b-5p	hsa-miR-26a-5p	hsa-miR-99b-3p	hsa-miR-708-5p	hsa-miR-1908-5p	hsa-miR-149-5p	hsa-miR-30a-5p	hsa-miR-196b-5p	hsa-miR-137	hsa-miR-143-3p	hsa-let-7e-5p	hsa-miR-99a-5p	hsa-miR-296-3p	hsa-miR-146b-5p	hsa-miR-3934-5p	hsa-miR-155-5p	hsa-miR-193b-3p	hsa-miR-16-5p	hsa-miR-26b-5p	hsa-miR-484	hsa-miR-1301-3p	hsa-miR-15a-5p	hsa-miR-615-3p	hsa-miR-331-3p	hsa-miR-93-3p	hsa-miR-196a-5p	hsa-miR-92a-3p	hsa-miR-346	hsa-miR-550a-5p	hsa-miR-652-3p	hsa-miR-10a-5p	hsa-miR-338-3p	hsa-miR-361-5p	hsa-miR-19b-3p	hsa-miR-766-3p	hsa-miR-186-5p	hsa-miR-32-5p	hsa-miR-423-5p	hsa-miR-488-5p	hsa-miR-17-5p	hsa-let-7a-5p	hsa-let-7b-5p	hsa-miR-181a-5p	hsa-miR-98-5p	hsa-miR-17-3p	hsa-miR-378a-5p	hsa-miR-23b-3p
P04398_p53_pathway_feedback_loops_2	Pathways	hsa-miR-125b-5p	hsa-miR-150-5p	hsa-miR-125a-5p	hsa-miR-675-5p	hsa-miR-193a-5p	hsa-miR-1226-3p	hsa-miR-96-5p	hsa-miR-141-3p	hsa-miR-30d-5p	hsa-miR-877-3p	hsa-miR-942-5p	hsa-miR-143-3p	hsa-miR-214-3p	hsa-miR-149-3p	hsa-miR-296-3p	hsa-miR-34c-5p	hsa-miR-22-3p	hsa-miR-26b-5p	hsa-miR-484	hsa-miR-615-3p	hsa-miR-885-5p	hsa-miR-1229-3p	hsa-miR-92a-3p	hsa-miR-182-5p	hsa-miR-324-5p	hsa-miR-520b	hsa-miR-520h	hsa-miR-532-3p	hsa-miR-320b	hsa-miR-505-5p	hsa-miR-423-5p	hsa-miR-181d-5p	hsa-miR-519c-3p	hsa-miR-144-3p	hsa-miR-98-5p	hsa-let-7i-5p	hsa-miR-657	hsa-miR-32-5p	hsa-miR-124-3p	hsa-miR-106b-5p	hsa-miR-181c-5p	hsa-miR-744-5p	hsa-miR-372-3p	hsa-miR-374a-5p	hsa-miR-503-5p	hsa-miR-18a-3p	hsa-miR-302c-3p	hsa-miR-520a-3p
P04377_Beta1_adrenergic_receptor_signaling_pathway	Pathways	hsa-miR-197-3p	hsa-miR-1-3p	hsa-miR-130b-3p	hsa-miR-30a-5p	hsa-miR-196b-5p	hsa-let-7c-5p	hsa-miR-25-3p	hsa-let-7e-5p	hsa-miR-148a-3p	hsa-miR-590-3p	hsa-miR-99a-5p	hsa-miR-423-5p	hsa-miR-7-5p	hsa-miR-365a-3p	hsa-miR-22-3p	hsa-miR-1260b	hsa-miR-193b-3p	hsa-miR-16-5p	hsa-miR-26b-5p	hsa-miR-484	hsa-miR-331-3p	hsa-miR-505-3p	hsa-miR-155-5p	hsa-miR-92a-3p	hsa-miR-93-5p	hsa-miR-324-5p	hsa-miR-21-5p	hsa-miR-29c-3p	hsa-miR-10a-5p	hsa-miR-19b-3p	hsa-miR-186-5p	hsa-miR-128-3p	hsa-miR-34a-5p	hsa-miR-17-5p	hsa-let-7b-5p	hsa-miR-769-3p	hsa-miR-98-5p	hsa-miR-133a-3p	hsa-miR-92b-3p	hsa-miR-124-3p	hsa-miR-589-3p	hsa-miR-27b-3p	hsa-miR-27a-3p	hsa-miR-744-5p	hsa-miR-101-3p	hsa-miR-100-5p	hsa-miR-23a-3p	hsa-miR-335-5p
WP382_MAPK_signaling_pathway	Pathways	hsa-miR-125b-5p	hsa-miR-210-3p	hsa-miR-150-5p	hsa-miR-199a-3p	hsa-miR-19b-1-5p	hsa-miR-130b-3p	hsa-miR-96-5p	hsa-miR-141-3p	hsa-miR-218-5p	hsa-miR-877-3p	hsa-miR-33a-5p	hsa-miR-143-3p	hsa-miR-214-3p	hsa-miR-149-3p	hsa-miR-296-3p	hsa-miR-34c-5p	hsa-miR-22-3p	hsa-miR-26b-5p	hsa-miR-484	hsa-miR-615-3p	hsa-miR-376a-3p	hsa-miR-196a-5p	hsa-miR-1229-3p	hsa-miR-92a-3p	hsa-miR-342-3p	hsa-miR-182-5p	hsa-miR-324-5p	hsa-miR-320b	hsa-miR-125a-5p	hsa-miR-532-3p	hsa-miR-766-3p	hsa-miR-423-5p	hsa-miR-324-3p	hsa-miR-30d-5p	hsa-miR-500a-3p	hsa-miR-98-5p	hsa-miR-92b-3p	hsa-miR-32-5p	hsa-miR-124-3p	hsa-miR-106b-5p	hsa-miR-129-1-3p	hsa-miR-744-5p	hsa-miR-101-3p	hsa-miR-151a-3p	hsa-miR-374a-5p	hsa-miR-503-5p	hsa-miR-200c-3p	hsa-miR-18a-3p
hsa05120_Epithelial_cell_signaling_in_Helicobacter_pylori_infection	Pathways	hsa-miR-125b-5p	hsa-miR-210-3p	hsa-miR-125a-5p	hsa-miR-130b-3p	hsa-miR-96-5p	hsa-miR-218-5p	hsa-miR-877-3p	hsa-miR-33a-5p	hsa-miR-214-3p	hsa-miR-34c-5p	hsa-miR-373-3p	hsa-miR-26b-5p	hsa-miR-484	hsa-miR-204-5p	hsa-miR-196a-5p	hsa-miR-92a-3p	hsa-miR-342-3p	hsa-miR-1914-3p	hsa-miR-140-3p	hsa-let-7c-3p	hsa-miR-423-5p	hsa-miR-199a-3p	hsa-miR-30d-5p	hsa-miR-98-5p	hsa-miR-1303	hsa-miR-106b-5p	hsa-miR-124-3p	hsa-miR-101-3p	hsa-miR-503-5p	hsa-miR-200c-3p	hsa-miR-18a-3p	hsa-miR-130b-5p	hsa-miR-542-5p	hsa-miR-30a-5p	hsa-miR-455-3p	hsa-miR-30e-3p	hsa-miR-15b-5p	hsa-miR-24-3p	hsa-miR-146b-5p	hsa-miR-15a-5p	hsa-miR-421	hsa-miR-324-3p	hsa-miR-93-5p	hsa-miR-562	hsa-miR-29a-3p	hsa-miR-137	hsa-miR-652-3p	hsa-miR-221-3p
WP195_IL_1_signaling_pathway	Pathways	hsa-miR-125b-5p	hsa-miR-210-3p	hsa-miR-186-3p	hsa-miR-125a-5p	hsa-miR-1226-3p	hsa-miR-96-5p	hsa-miR-218-5p	hsa-miR-33a-5p	hsa-miR-143-3p	hsa-miR-214-3p	hsa-miR-149-3p	hsa-miR-296-3p	hsa-miR-1914-3p	hsa-miR-373-3p	hsa-miR-26b-5p	hsa-miR-484	hsa-miR-204-5p	hsa-miR-497-5p	hsa-miR-196a-5p	hsa-miR-1229-3p	hsa-miR-92a-3p	hsa-miR-342-3p	hsa-miR-324-5p	hsa-miR-1228-3p	hsa-miR-520b	hsa-miR-140-3p	hsa-miR-615-3p	hsa-miR-766-3p	hsa-miR-423-5p	hsa-miR-199a-3p	hsa-miR-30d-5p	hsa-miR-98-5p	hsa-miR-92b-3p	hsa-miR-124-3p	hsa-miR-106b-5p	hsa-miR-744-5p	hsa-miR-101-3p	hsa-miR-200c-3p	hsa-miR-302c-3p	hsa-miR-130b-5p	hsa-miR-30a-5p	hsa-miR-15b-5p	hsa-miR-24-3p	hsa-miR-26a-5p	hsa-miR-15a-5p	hsa-miR-421	hsa-miR-93-5p	hsa-miR-29a-3p
WP58_Monoamine_GPCRs	Pathways	hsa-miR-296-3p	hsa-miR-22-3p	hsa-miR-124-3p	hsa-miR-196b-5p	hsa-miR-26b-5p	hsa-miR-484	hsa-miR-192-5p	hsa-miR-504-5p	hsa-miR-96-5p	hsa-miR-10b-5p	hsa-miR-107	hsa-miR-335-5p
P00023_General_transcription_regulation	Pathways	hsa-miR-132-3p	hsa-miR-9-5p	hsa-miR-17-5p	hsa-miR-149-5p	hsa-miR-1-3p	hsa-miR-215-5p	hsa-miR-30a-5p	hsa-miR-100-5p	hsa-miR-96-5p	hsa-miR-30d-5p	hsa-miR-877-3p	hsa-miR-33a-5p	hsa-miR-16-5p	hsa-miR-99a-5p	hsa-miR-24-3p	hsa-miR-99a-3p	hsa-miR-193b-3p	hsa-miR-374b-5p	hsa-miR-26b-5p	hsa-miR-484	hsa-miR-15a-5p	hsa-miR-615-3p	hsa-miR-92a-3p	hsa-miR-324-3p	hsa-miR-122-5p	hsa-miR-21-5p	hsa-miR-7-5p	hsa-miR-10a-5p	hsa-miR-361-5p	hsa-miR-19b-3p	hsa-miR-766-3p	hsa-miR-221-3p	hsa-miR-423-5p	hsa-miR-1296-5p	hsa-let-7a-5p	hsa-let-7b-5p	hsa-miR-181a-5p	hsa-miR-378a-5p	hsa-miR-339-5p	hsa-miR-320a	hsa-miR-93-5p	hsa-miR-92b-3p	hsa-miR-192-5p	hsa-miR-877-5p	hsa-miR-155-5p	hsa-miR-335-5p	hsa-miR-424-5p	hsa-let-7f-5p
P00019_Endothelin_signaling_pathway	Pathways	hsa-miR-125b-5p	hsa-miR-3934-5p	hsa-miR-199a-3p	hsa-miR-24-2-5p	hsa-miR-1226-3p	hsa-miR-96-5p	hsa-miR-877-3p	hsa-miR-143-3p	hsa-miR-149-3p	hsa-miR-296-3p	hsa-miR-22-3p	hsa-miR-26b-5p	hsa-miR-484	hsa-miR-615-3p	hsa-miR-497-5p	hsa-miR-92a-3p	hsa-miR-342-3p	hsa-miR-182-5p	hsa-miR-324-5p	hsa-miR-766-3p	hsa-miR-423-5p	hsa-miR-324-3p	hsa-miR-98-5p	hsa-let-7i-5p	hsa-miR-92b-3p	hsa-miR-32-5p	hsa-miR-124-3p	hsa-miR-744-5p	hsa-miR-101-3p	hsa-miR-200c-3p	hsa-miR-18a-3p	hsa-miR-10b-5p	hsa-miR-302c-3p	hsa-miR-25-3p	hsa-miR-877-5p	hsa-miR-15b-5p	hsa-miR-99a-5p	hsa-miR-7-5p	hsa-miR-1260b	hsa-miR-15a-5p	hsa-miR-505-5p	hsa-miR-1296-5p	hsa-miR-93-5p	hsa-miR-29a-3p	hsa-miR-137	hsa-miR-652-3p	hsa-miR-148b-3p	hsa-miR-483-5p
hsa05217_Basal_cell_carcinoma	Pathways	hsa-miR-125b-5p	hsa-miR-210-3p	hsa-miR-150-5p	hsa-miR-125a-5p	hsa-miR-877-3p	hsa-miR-214-3p	hsa-miR-26b-5p	hsa-miR-484	hsa-miR-615-3p	hsa-miR-92a-3p	hsa-miR-324-5p	hsa-miR-338-3p	hsa-miR-30d-5p	hsa-miR-98-5p	hsa-miR-124-3p	hsa-miR-106b-5p	hsa-miR-744-5p	hsa-miR-101-3p	hsa-miR-200c-3p	hsa-miR-30a-5p	hsa-miR-1285-3p	hsa-miR-148a-3p	hsa-miR-7-5p	hsa-miR-26a-5p	hsa-miR-15a-5p	hsa-miR-429	hsa-miR-324-3p	hsa-miR-93-5p	hsa-miR-326	hsa-miR-148b-3p	hsa-miR-221-3p	hsa-miR-605-5p	hsa-miR-940	hsa-miR-200a-3p	hsa-miR-320c	hsa-miR-335-5p	hsa-miR-320a	hsa-miR-132-3p	hsa-miR-10b-5p	hsa-miR-25-3p	hsa-miR-31-5p	hsa-miR-16-5p	hsa-miR-222-3p	hsa-miR-374b-5p	hsa-miR-1301-3p	hsa-miR-454-3p	hsa-miR-93-3p	hsa-miR-122-5p
P00049_Parkinson_disease	Pathways	hsa-miR-125b-5p	hsa-miR-1910-5p	hsa-miR-199a-3p	hsa-miR-125a-5p	hsa-let-7a-5p	hsa-miR-96-5p	hsa-miR-877-3p	hsa-miR-33a-5p	hsa-miR-143-3p	hsa-miR-214-3p	hsa-miR-18a-5p	hsa-miR-296-3p	hsa-miR-34c-5p	hsa-miR-22-3p	hsa-miR-26b-5p	hsa-miR-484	hsa-miR-615-3p	hsa-miR-196a-5p	hsa-miR-1229-3p	hsa-miR-92a-3p	hsa-miR-324-5p	hsa-miR-320b	hsa-miR-450a-5p	hsa-miR-140-3p	hsa-miR-766-3p	hsa-miR-423-5p	hsa-miR-1296-5p	hsa-miR-30d-5p	hsa-miR-98-5p	hsa-miR-92b-3p	hsa-miR-32-5p	hsa-miR-124-3p	hsa-miR-106b-5p	hsa-miR-744-5p	hsa-miR-503-5p	hsa-miR-200c-3p	hsa-miR-18a-3p	hsa-miR-328-3p	hsa-miR-130b-5p	hsa-miR-25-3p	hsa-miR-30a-5p	hsa-miR-455-3p	hsa-miR-151a-5p	hsa-miR-15b-5p	hsa-miR-99a-5p	hsa-miR-24-3p	hsa-miR-340-3p	hsa-miR-26a-5p
hsa05222_Small_cell_lung_cancer	Pathways	hsa-miR-125b-5p	hsa-miR-3934-5p	hsa-miR-210-3p	hsa-miR-150-5p	hsa-miR-24-2-5p	hsa-miR-675-5p	hsa-miR-941	hsa-miR-130b-3p	hsa-miR-96-5p	hsa-miR-141-3p	hsa-miR-218-5p	hsa-miR-877-3p	hsa-miR-143-3p	hsa-miR-214-3p	hsa-miR-149-3p	hsa-miR-296-3p	hsa-miR-34c-5p	hsa-miR-22-3p	hsa-miR-26b-5p	hsa-miR-484	hsa-miR-204-5p	hsa-miR-885-5p	hsa-miR-196a-5p	hsa-miR-92a-3p	hsa-miR-182-5p	hsa-miR-324-5p	hsa-miR-520b	hsa-miR-373-3p	hsa-miR-19b-1-5p	hsa-miR-615-3p	hsa-miR-338-3p	hsa-miR-766-3p	hsa-miR-320b	hsa-miR-423-5p	hsa-miR-190a-5p	hsa-miR-181d-5p	hsa-miR-519c-3p	hsa-miR-500a-3p	hsa-miR-98-5p	hsa-miR-32-5p	hsa-miR-124-3p	hsa-miR-106b-5p	hsa-miR-1303	hsa-miR-181c-5p	hsa-miR-199b-5p	hsa-miR-744-5p	hsa-miR-101-3p	hsa-miR-151a-3p
WP1984_Integrated_Breast_Cancer_Pathway	Pathways	hsa-miR-125b-5p	hsa-miR-150-5p	hsa-miR-19b-1-5p	hsa-miR-130b-3p	hsa-miR-96-5p	hsa-miR-218-5p	hsa-miR-877-3p	hsa-miR-33a-5p	hsa-miR-143-3p	hsa-miR-149-3p	hsa-miR-296-3p	hsa-miR-22-3p	hsa-miR-26b-5p	hsa-miR-484	hsa-miR-615-3p	hsa-miR-196a-5p	hsa-miR-92a-3p	hsa-miR-342-3p	hsa-miR-182-5p	hsa-miR-324-5p	hsa-miR-373-3p	hsa-miR-125a-5p	hsa-miR-766-3p	hsa-miR-423-5p	hsa-miR-181d-5p	hsa-miR-199a-3p	hsa-miR-30d-5p	hsa-miR-144-3p	hsa-miR-98-5p	hsa-let-7i-5p	hsa-miR-92b-3p	hsa-miR-32-5p	hsa-miR-124-3p	hsa-miR-106b-5p	hsa-miR-181c-5p	hsa-miR-744-5p	hsa-miR-101-3p	hsa-miR-374a-5p	hsa-miR-503-5p	hsa-miR-200c-3p	hsa-miR-18a-3p	hsa-miR-193a-3p	hsa-miR-302c-3p	hsa-miR-130b-5p	hsa-miR-625-5p	hsa-miR-383-5p	hsa-miR-30c-5p	hsa-miR-30a-5p
WP80_Nucleotide_GPCRs	Pathways	hsa-miR-26b-5p	hsa-miR-27b-3p	hsa-miR-335-5p
P00046_Oxidative_stress_response	Pathways	hsa-miR-125b-5p	hsa-miR-24-2-5p	hsa-miR-130b-3p	hsa-miR-96-5p	hsa-miR-218-5p	hsa-miR-30a-3p	hsa-miR-33a-5p	hsa-miR-143-3p	hsa-miR-214-3p	hsa-miR-34c-5p	hsa-miR-26b-5p	hsa-miR-204-5p	hsa-miR-92a-3p	hsa-miR-342-3p	hsa-miR-182-5p	hsa-miR-125a-5p	hsa-miR-423-5p	hsa-miR-181d-5p	hsa-miR-199a-3p	hsa-miR-98-5p	hsa-miR-32-5p	hsa-miR-124-3p	hsa-miR-106b-5p	hsa-miR-181c-5p	hsa-miR-744-5p	hsa-miR-101-3p	hsa-miR-200c-3p	hsa-miR-877-3p	hsa-miR-30a-5p	hsa-miR-148a-3p	hsa-miR-15b-5p	hsa-miR-7-5p	hsa-miR-26a-5p	hsa-miR-15a-5p	hsa-miR-429	hsa-miR-296-5p	hsa-miR-421	hsa-miR-324-3p	hsa-miR-93-5p	hsa-miR-29a-3p	hsa-miR-335-5p	hsa-miR-19b-3p	hsa-miR-146b-5p	hsa-miR-29b-3p	hsa-miR-200a-3p	hsa-miR-449c-5p	hsa-miR-34b-5p	hsa-miR-630
hsa04540_Gap_junction	Pathways	hsa-miR-125b-5p	hsa-miR-3934-5p	hsa-miR-199a-3p	hsa-miR-24-2-5p	hsa-miR-1226-3p	hsa-miR-96-5p	hsa-miR-877-3p	hsa-miR-33a-5p	hsa-miR-143-3p	hsa-miR-214-3p	hsa-miR-25-3p	hsa-miR-296-3p	hsa-miR-22-3p	hsa-miR-26b-5p	hsa-miR-484	hsa-miR-615-3p	hsa-miR-196a-5p	hsa-miR-1180-3p	hsa-miR-92a-3p	hsa-miR-342-3p	hsa-miR-182-5p	hsa-miR-324-5p	hsa-miR-520b	hsa-miR-140-3p	hsa-miR-766-3p	hsa-miR-505-5p	hsa-miR-423-5p	hsa-miR-181d-5p	hsa-miR-1296-5p	hsa-miR-30d-5p	hsa-miR-98-5p	hsa-miR-92b-3p	hsa-miR-32-5p	hsa-miR-124-3p	hsa-miR-106b-5p	hsa-miR-181c-5p	hsa-miR-744-5p	hsa-miR-101-3p	hsa-miR-92a-1-5p	hsa-miR-200c-3p	hsa-miR-18a-3p	hsa-miR-542-5p	hsa-miR-30a-3p	hsa-miR-877-5p	hsa-miR-15b-5p	hsa-miR-99a-5p	hsa-miR-7-5p	hsa-miR-26a-5p
hsa04660_T_cell_receptor_signaling_pathway	Pathways	hsa-miR-125b-5p	hsa-miR-210-3p	hsa-miR-199a-3p	hsa-miR-125a-5p	hsa-miR-96-5p	hsa-miR-218-5p	hsa-miR-877-3p	hsa-miR-33a-5p	hsa-miR-143-3p	hsa-miR-149-3p	hsa-miR-296-3p	hsa-miR-34c-5p	hsa-miR-373-3p	hsa-miR-26b-5p	hsa-miR-484	hsa-miR-615-3p	hsa-miR-497-5p	hsa-miR-98-5p	hsa-miR-1229-3p	hsa-miR-92a-3p	hsa-miR-342-3p	hsa-miR-1914-3p	hsa-miR-409-3p	hsa-miR-320b	hsa-miR-204-5p	hsa-miR-532-3p	hsa-miR-766-3p	hsa-miR-423-5p	hsa-miR-181d-5p	hsa-miR-324-3p	hsa-miR-500a-3p	hsa-miR-361-3p	hsa-miR-92b-3p	hsa-miR-124-3p	hsa-miR-106b-5p	hsa-miR-181c-5p	hsa-miR-744-5p	hsa-miR-101-3p	hsa-miR-151a-3p	hsa-miR-200c-3p	hsa-miR-18a-3p	hsa-miR-302c-3p	hsa-miR-30c-5p	hsa-miR-30a-5p	hsa-miR-30e-3p	hsa-miR-199a-5p	hsa-miR-15b-5p	hsa-miR-24-3p
WP247_Small_Ligand_GPCRs	Pathways	hsa-miR-200c-3p	hsa-miR-148b-3p	hsa-miR-21-5p	hsa-miR-335-5p	hsa-miR-124-3p
hsa04144_Endocytosis	Pathways	hsa-miR-125b-5p	hsa-miR-210-3p	hsa-miR-150-5p	hsa-miR-199a-3p	hsa-miR-19b-1-5p	hsa-let-7a-5p	hsa-miR-96-5p	hsa-miR-218-5p	hsa-miR-877-3p	hsa-miR-33a-5p	hsa-miR-143-3p	hsa-miR-18a-5p	hsa-miR-296-3p	hsa-miR-34c-5p	hsa-miR-22-3p	hsa-miR-99a-3p	hsa-miR-26b-5p	hsa-miR-484	hsa-miR-615-3p	hsa-miR-497-5p	hsa-miR-196a-5p	hsa-miR-92a-3p	hsa-miR-182-5p	hsa-miR-324-5p	hsa-miR-320b	hsa-miR-125a-5p	hsa-miR-532-3p	hsa-miR-483-3p	hsa-miR-505-5p	hsa-miR-423-5p	hsa-miR-181d-5p	hsa-miR-1296-5p	hsa-miR-30d-5p	hsa-miR-500a-3p	hsa-miR-98-5p	hsa-miR-92b-3p	hsa-miR-32-5p	hsa-miR-124-3p	hsa-miR-106b-5p	hsa-miR-766-3p	hsa-miR-1303	hsa-miR-181c-5p	hsa-miR-744-5p	hsa-miR-372-3p	hsa-miR-374a-5p	hsa-miR-503-5p	hsa-miR-200c-3p	hsa-miR-18a-3p
WP1539_Angiogenesis	Pathways	hsa-miR-18a-5p	hsa-miR-125b-5p	hsa-miR-302c-3p	hsa-miR-28-5p	hsa-miR-302a-3p	hsa-miR-221-3p	hsa-miR-199a-3p	hsa-miR-19b-1-5p	hsa-miR-18b-5p	hsa-miR-302d-3p	hsa-miR-1-3p	hsa-miR-215-5p	hsa-miR-30c-5p	hsa-miR-30a-5p	hsa-miR-100-5p	hsa-miR-519c-3p	hsa-miR-877-3p	hsa-miR-33a-5p	hsa-let-7e-5p	hsa-miR-149-3p	hsa-miR-15b-5p	hsa-miR-181b-5p	hsa-miR-185-5p	hsa-miR-146b-3p	hsa-miR-193b-3p	hsa-miR-143-3p	hsa-miR-26b-5p	hsa-miR-26a-5p	hsa-miR-1301-3p	hsa-miR-935	hsa-miR-519d-3p	hsa-miR-205-5p	hsa-miR-30b-5p	hsa-miR-302b-3p	hsa-miR-92a-3p	hsa-miR-324-3p	hsa-miR-324-5p	hsa-miR-20b-5p	hsa-miR-21-5p	hsa-miR-424-5p	hsa-miR-200b-3p	hsa-miR-148b-3p	hsa-miR-23b-3p	hsa-miR-338-3p	hsa-miR-34a-5p	hsa-miR-140-5p	hsa-miR-186-5p	hsa-miR-423-5p
WP1604_Codeine_and_morphine_metabolism	Pathways	hsa-miR-197-3p	hsa-miR-124-3p	hsa-miR-26b-5p	hsa-miR-451a	hsa-miR-192-5p	hsa-miR-296-5p	hsa-miR-27b-3p	hsa-miR-335-5p
hsa04140_Regulation_of_autophagy	Pathways	hsa-miR-125b-5p	hsa-miR-149-5p	hsa-miR-215-5p	hsa-miR-130b-3p	hsa-miR-30a-5p	hsa-miR-100-5p	hsa-miR-330-3p	hsa-miR-877-3p	hsa-miR-16-5p	hsa-miR-15b-5p	hsa-miR-744-5p	hsa-miR-374b-5p	hsa-miR-26b-5p	hsa-miR-15a-5p	hsa-miR-10a-5p	hsa-miR-30b-5p	hsa-miR-92a-3p	hsa-miR-122-5p	hsa-miR-182-5p	hsa-miR-409-3p	hsa-miR-503-5p	hsa-miR-652-3p	hsa-miR-148b-3p	hsa-miR-19b-3p	hsa-let-7a-5p	hsa-miR-186-5p	hsa-miR-423-5p	hsa-miR-30e-5p	hsa-miR-1226-3p	hsa-let-7b-5p	hsa-miR-98-5p	hsa-miR-29b-3p	hsa-miR-128-3p	hsa-miR-124-3p	hsa-miR-192-5p	hsa-miR-155-5p	hsa-miR-320c	hsa-miR-335-5p	hsa-miR-320a	hsa-miR-375	hsa-miR-103a-3p
P02745_Glutamine_glutamate_conversion	Pathways	hsa-miR-149-5p	hsa-miR-1226-3p	hsa-miR-877-5p	hsa-miR-877-3p	hsa-let-7e-5p	hsa-miR-99a-5p	hsa-miR-24-3p	hsa-miR-185-5p	hsa-miR-193b-3p	hsa-miR-484	hsa-miR-615-3p	hsa-miR-93-3p	hsa-miR-196a-5p	hsa-miR-29a-3p	hsa-miR-296-3p	hsa-miR-937-3p	hsa-miR-186-5p	hsa-miR-423-5p	hsa-let-7a-5p	hsa-miR-183-5p	hsa-miR-320b	hsa-miR-320a	hsa-miR-125a-3p	hsa-let-7f-5p
hsa04020_Calcium_signaling_pathway	Pathways	hsa-miR-125b-5p	hsa-miR-559	hsa-miR-150-5p	hsa-miR-186-3p	hsa-miR-125a-5p	hsa-let-7a-5p	hsa-miR-96-5p	hsa-miR-877-3p	hsa-miR-296-3p	hsa-miR-1914-3p	hsa-miR-22-3p	hsa-miR-26b-5p	hsa-miR-484	hsa-miR-204-5p	hsa-miR-196a-5p	hsa-miR-92a-3p	hsa-miR-324-5p	hsa-miR-24-2-5p	hsa-miR-615-3p	hsa-miR-532-3p	hsa-miR-219a-5p	hsa-miR-423-5p	hsa-miR-1296-5p	hsa-miR-98-5p	hsa-miR-92b-3p	hsa-miR-32-5p	hsa-miR-124-3p	hsa-miR-106b-5p	hsa-miR-802	hsa-miR-3198	hsa-miR-199b-5p	hsa-miR-744-5p	hsa-miR-372-3p	hsa-miR-200c-3p	hsa-miR-18a-3p	hsa-miR-542-5p	hsa-miR-30c-5p	hsa-miR-877-5p	hsa-miR-148a-3p	hsa-miR-15b-5p	hsa-miR-99a-5p	hsa-miR-7-5p	hsa-miR-26a-5p	hsa-miR-15a-5p	hsa-miR-421	hsa-miR-324-3p	hsa-miR-93-5p	hsa-miR-326
WP2118_Arrhythmogenic_right_ventricular_cardiomyopathy	Pathways	hsa-miR-125b-5p	hsa-miR-19b-1-5p	hsa-let-7a-5p	hsa-miR-96-5p	hsa-miR-218-5p	hsa-miR-877-3p	hsa-miR-214-3p	hsa-miR-296-3p	hsa-miR-671-5p	hsa-miR-26b-5p	hsa-miR-484	hsa-miR-615-3p	hsa-miR-196a-5p	hsa-miR-1229-3p	hsa-miR-92a-3p	hsa-miR-342-3p	hsa-miR-182-5p	hsa-miR-324-5p	hsa-miR-204-5p	hsa-miR-532-3p	hsa-miR-423-5p	hsa-miR-98-5p	hsa-miR-92b-3p	hsa-miR-32-5p	hsa-miR-124-3p	hsa-miR-27b-5p	hsa-miR-744-5p	hsa-miR-200c-3p	hsa-miR-18a-3p	hsa-miR-9-3p	hsa-miR-30c-5p	hsa-miR-877-5p	hsa-miR-455-3p	hsa-miR-15b-5p	hsa-miR-7-5p	hsa-miR-1227-3p	hsa-miR-26a-5p	hsa-miR-429	hsa-miR-324-3p	hsa-miR-93-5p	hsa-miR-29a-3p	hsa-miR-326	hsa-miR-1307-3p	hsa-miR-652-3p	hsa-miR-148b-3p	hsa-miR-221-3p	hsa-miR-194-5p	hsa-miR-769-5p
P02743_Formyltetrahydroformate_biosynthesis	Pathways	hsa-miR-1-3p	hsa-miR-215-5p	hsa-miR-96-5p	hsa-miR-887-3p	hsa-miR-16-5p	hsa-miR-99a-5p	hsa-miR-193b-3p	hsa-miR-26b-5p	hsa-miR-484	hsa-miR-615-3p	hsa-miR-421	hsa-miR-29c-3p	hsa-miR-10a-5p	hsa-miR-34a-5p	hsa-miR-194-5p	hsa-miR-30e-5p	hsa-miR-30d-5p	hsa-let-7b-5p	hsa-miR-106b-5p	hsa-miR-192-5p	hsa-miR-155-5p	hsa-miR-18a-3p
hsa04310_Wnt_signaling_pathway	Pathways	hsa-miR-125b-5p	hsa-miR-210-3p	hsa-miR-150-5p	hsa-miR-19b-1-5p	hsa-miR-1226-3p	hsa-miR-141-3p	hsa-miR-218-5p	hsa-miR-877-3p	hsa-miR-33a-5p	hsa-miR-214-3p	hsa-miR-34c-5p	hsa-miR-22-3p	hsa-miR-26b-5p	hsa-miR-484	hsa-miR-615-3p	hsa-miR-196a-5p	hsa-miR-361-3p	hsa-miR-92a-3p	hsa-miR-342-3p	hsa-miR-182-5p	hsa-miR-324-5p	hsa-miR-520b	hsa-miR-30b-3p	hsa-miR-125a-5p	hsa-miR-338-3p	hsa-miR-219a-5p	hsa-miR-483-3p	hsa-miR-505-5p	hsa-miR-423-5p	hsa-miR-181d-5p	hsa-miR-199a-3p	hsa-miR-30d-5p	hsa-miR-98-5p	hsa-miR-92b-3p	hsa-miR-454-3p	hsa-miR-124-3p	hsa-miR-106b-5p	hsa-miR-181c-5p	hsa-miR-744-5p	hsa-miR-101-3p	hsa-miR-374a-5p	hsa-miR-503-5p	hsa-miR-200c-3p	hsa-miR-302c-3p	hsa-miR-130b-5p	hsa-miR-25-3p	hsa-miR-877-5p	hsa-miR-1285-3p
WP334_GPCRs_Class_B_Secretin_like	Pathways	hsa-let-7i-5p	hsa-miR-21-5p	hsa-miR-124-3p	hsa-miR-148b-3p	hsa-miR-26b-5p	hsa-miR-484	hsa-miR-98-5p	hsa-miR-20a-5p	hsa-miR-19b-3p	hsa-miR-221-3p	hsa-miR-455-3p	hsa-miR-335-5p	hsa-let-7b-5p	hsa-miR-18a-3p	hsa-miR-16-5p	hsa-miR-103a-3p	hsa-miR-328-3p
WP49_IL_2_Signaling_pathway	Pathways	hsa-miR-125b-5p	hsa-miR-24-2-5p	hsa-miR-96-5p	hsa-miR-218-5p	hsa-miR-877-3p	hsa-miR-143-3p	hsa-miR-149-3p	hsa-miR-34c-5p	hsa-miR-26b-5p	hsa-miR-484	hsa-miR-615-3p	hsa-miR-497-5p	hsa-miR-196a-5p	hsa-miR-1229-3p	hsa-miR-92a-3p	hsa-miR-342-3p	hsa-miR-182-5p	hsa-miR-766-3p	hsa-miR-423-5p	hsa-miR-181d-5p	hsa-miR-199a-3p	hsa-miR-98-5p	hsa-miR-92b-3p	hsa-miR-124-3p	hsa-miR-106b-5p	hsa-miR-181c-5p	hsa-miR-744-5p	hsa-miR-101-3p	hsa-miR-200c-3p	hsa-miR-302c-3p	hsa-miR-130b-5p	hsa-miR-877-5p	hsa-miR-148a-3p	hsa-miR-15b-5p	hsa-miR-99a-5p	hsa-miR-7-5p	hsa-miR-1260b	hsa-miR-26a-5p	hsa-miR-15a-5p	hsa-miR-429	hsa-miR-296-5p	hsa-miR-324-3p	hsa-miR-93-5p	hsa-miR-29a-3p	hsa-miR-652-3p	hsa-miR-483-5p	hsa-miR-221-3p	hsa-miR-19b-3p
P00010_B_cell_activation	Pathways	hsa-miR-125b-5p	hsa-miR-125a-5p	hsa-let-7a-5p	hsa-miR-96-5p	hsa-miR-218-5p	hsa-miR-877-3p	hsa-miR-33a-5p	hsa-miR-143-3p	hsa-miR-214-3p	hsa-miR-26b-5p	hsa-miR-484	hsa-miR-615-3p	hsa-miR-497-5p	hsa-miR-98-5p	hsa-miR-92a-3p	hsa-miR-342-3p	hsa-miR-324-5p	hsa-miR-520b	hsa-miR-140-3p	hsa-miR-766-3p	hsa-miR-423-5p	hsa-miR-181d-5p	hsa-miR-199a-3p	hsa-miR-361-3p	hsa-miR-92b-3p	hsa-miR-32-5p	hsa-miR-124-3p	hsa-miR-106b-5p	hsa-miR-101-3p	hsa-miR-200c-3p	hsa-miR-139-5p	hsa-miR-30a-5p	hsa-miR-15b-5p	hsa-miR-7-5p	hsa-miR-26a-5p	hsa-miR-15a-5p	hsa-miR-421	hsa-miR-324-3p	hsa-miR-93-5p	hsa-miR-335-5p	hsa-miR-30e-3p	hsa-miR-652-3p	hsa-miR-148b-3p	hsa-miR-483-5p	hsa-miR-221-3p	hsa-miR-194-5p	hsa-miR-433-3p	hsa-miR-29b-3p
hsa05223_Non_small_cell_lung_cancer	Pathways	hsa-miR-125b-5p	hsa-miR-559	hsa-miR-210-3p	hsa-miR-150-5p	hsa-miR-19b-1-5p	hsa-miR-675-5p	hsa-miR-130b-3p	hsa-miR-96-5p	hsa-miR-218-5p	hsa-miR-877-3p	hsa-miR-143-3p	hsa-miR-214-3p	hsa-miR-149-3p	hsa-miR-296-3p	hsa-miR-34c-5p	hsa-miR-22-3p	hsa-miR-26b-5p	hsa-miR-484	hsa-miR-615-3p	hsa-miR-497-5p	hsa-miR-196a-5p	hsa-miR-92a-3p	hsa-miR-182-5p	hsa-miR-1914-3p	hsa-miR-520b	hsa-miR-125a-5p	hsa-miR-338-3p	hsa-miR-766-3p	hsa-miR-423-5p	hsa-miR-181d-5p	hsa-miR-199a-3p	hsa-miR-30d-5p	hsa-miR-98-5p	hsa-miR-92b-3p	hsa-miR-32-5p	hsa-miR-1303	hsa-miR-106b-5p	hsa-miR-124-3p	hsa-miR-181c-5p	hsa-miR-199b-5p	hsa-miR-744-5p	hsa-miR-101-3p	hsa-miR-503-5p	hsa-miR-18a-3p	hsa-miR-302c-3p	hsa-miR-542-5p	hsa-miR-625-5p	hsa-miR-30a-3p
hsa00100_Steroid_biosynthesis	Pathways	hsa-miR-125b-5p	hsa-miR-149-5p	hsa-miR-215-5p	hsa-miR-30a-5p	hsa-miR-10b-5p	hsa-miR-218-5p	hsa-miR-31-5p	hsa-miR-16-5p	hsa-miR-15b-5p	hsa-miR-99a-5p	hsa-miR-24-3p	hsa-miR-744-5p	hsa-miR-193b-3p	hsa-let-7e-5p	hsa-miR-26b-5p	hsa-miR-484	hsa-miR-615-3p	hsa-miR-19a-3p	hsa-miR-93-3p	hsa-miR-92a-3p	hsa-miR-324-3p	hsa-miR-1260b	hsa-miR-10a-5p	hsa-miR-34a-5p	hsa-miR-186-5p	hsa-let-7b-5p	hsa-miR-500a-3p	hsa-miR-98-5p	hsa-miR-124-3p	hsa-miR-1303	hsa-miR-192-5p	hsa-miR-155-5p	hsa-miR-335-5p	hsa-miR-425-5p	hsa-miR-18a-3p	hsa-miR-760
WP1602_Nicotine_Activity_on_Dopaminergic_Neurons	Pathways	hsa-miR-132-3p	hsa-miR-1-3p	hsa-miR-215-5p	hsa-miR-30a-5p	hsa-miR-196b-5p	hsa-miR-16-5p	hsa-miR-365a-3p	hsa-miR-22-3p	hsa-miR-744-5p	hsa-miR-26b-5p	hsa-miR-615-3p	hsa-miR-331-3p	hsa-miR-10a-5p	hsa-miR-186-5p	hsa-miR-17-5p	hsa-let-7b-5p	hsa-miR-769-5p	hsa-miR-124-3p	hsa-miR-192-5p	hsa-miR-589-3p	hsa-miR-155-5p	hsa-miR-101-3p	hsa-miR-335-5p	hsa-miR-106a-5p	hsa-miR-103a-3p
P02772_Pyruvate_metabolism	Pathways	hsa-miR-125b-5p	hsa-miR-28-5p	hsa-miR-3187-3p	hsa-miR-1229-3p	hsa-miR-149-5p	hsa-miR-30c-5p	hsa-miR-30a-5p	hsa-miR-335-5p	hsa-miR-330-3p	hsa-miR-10b-5p	hsa-miR-877-3p	hsa-miR-296-3p	hsa-miR-222-3p	hsa-miR-193b-3p	hsa-miR-1260b	hsa-miR-484	hsa-miR-1301-3p	hsa-miR-935	hsa-miR-93-3p	hsa-miR-92a-3p	hsa-miR-324-3p	hsa-miR-122-5p	hsa-miR-324-5p	hsa-miR-10a-3p	hsa-miR-326	hsa-miR-125a-5p	hsa-miR-361-5p	hsa-miR-34a-5p	hsa-miR-133b	hsa-miR-221-3p	hsa-miR-423-5p	hsa-let-7a-5p	hsa-let-7b-5p	hsa-miR-769-3p	hsa-miR-766-3p	hsa-miR-769-5p	hsa-miR-133a-3p	hsa-miR-423-3p	hsa-miR-183-5p	hsa-let-7a-3p	hsa-miR-23a-3p	hsa-miR-320b	hsa-miR-320a	hsa-miR-18a-3p	hsa-miR-328-3p
P05911_Angiotensin_II_stimulated_signaling_through_G_proteins_and_beta_arrestin	Pathways	hsa-miR-186-5p	hsa-miR-26b-5p
hsa04340_Hedgehog_signaling_pathway	Pathways	hsa-miR-18a-5p	hsa-miR-125b-5p	hsa-miR-29c-3p	hsa-miR-9-5p	hsa-miR-17-5p	hsa-miR-149-5p	hsa-miR-1-3p	hsa-miR-215-5p	hsa-miR-130b-3p	hsa-miR-30a-5p	hsa-miR-196b-5p	hsa-miR-30c-5p	hsa-miR-33a-5p	hsa-miR-185-5p	hsa-miR-31-5p	hsa-let-7e-5p	hsa-miR-148a-3p	hsa-miR-590-3p	hsa-miR-7-5p	hsa-miR-365a-3p	hsa-miR-22-3p	hsa-miR-744-5p	hsa-miR-193b-3p	hsa-miR-16-5p	hsa-miR-26b-5p	hsa-miR-26a-5p	hsa-miR-1301-3p	hsa-miR-15a-5p	hsa-miR-615-3p	hsa-miR-331-3p	hsa-miR-10a-5p	hsa-miR-196a-5p	hsa-miR-142-3p	hsa-miR-92a-3p	hsa-miR-324-3p	hsa-miR-93-5p	hsa-miR-132-3p	hsa-miR-324-5p	hsa-miR-21-5p	hsa-miR-326	hsa-miR-652-3p	hsa-miR-148b-3p	hsa-miR-338-3p	hsa-miR-34a-5p	hsa-miR-186-5p	hsa-miR-128-3p	hsa-miR-222-3p	hsa-miR-19b-3p
P00012_Cadherin_signaling_pathway	Pathways	hsa-miR-125b-5p	hsa-miR-559	hsa-miR-210-3p	hsa-miR-125a-5p	hsa-miR-15a-5p	hsa-let-7a-5p	hsa-miR-877-3p	hsa-miR-33a-5p	hsa-miR-214-3p	hsa-miR-296-3p	hsa-miR-22-3p	hsa-miR-26b-5p	hsa-miR-484	hsa-miR-615-3p	hsa-miR-196a-5p	hsa-miR-1229-3p	hsa-miR-92a-3p	hsa-miR-342-3p	hsa-miR-324-5p	hsa-miR-204-5p	hsa-miR-532-3p	hsa-miR-423-5p	hsa-miR-19b-3p	hsa-miR-98-5p	hsa-miR-124-3p	hsa-miR-106b-5p	hsa-miR-27b-5p	hsa-miR-199b-5p	hsa-miR-744-5p	hsa-miR-372-3p	hsa-miR-200c-3p	hsa-miR-542-5p	hsa-miR-30c-5p	hsa-miR-877-5p	hsa-miR-455-3p	hsa-miR-29c-3p	hsa-miR-7-5p	hsa-miR-1227-3p	hsa-miR-26a-5p	hsa-miR-101-3p	hsa-miR-429	hsa-miR-421	hsa-miR-324-3p	hsa-miR-93-5p	hsa-miR-326	hsa-miR-1307-3p	hsa-miR-652-3p	hsa-miR-148b-3p
hsa04146_Peroxisome	Pathways	hsa-miR-377-3p	hsa-miR-26a-5p	hsa-miR-197-3p	hsa-miR-149-5p	hsa-let-7a-5p	hsa-miR-30a-5p	hsa-miR-100-5p	hsa-miR-935	hsa-miR-33a-5p	hsa-miR-877-3p	hsa-miR-191-5p	hsa-miR-31-5p	hsa-miR-16-5p	hsa-miR-181a-5p	hsa-miR-25-3p	hsa-miR-15b-5p	hsa-miR-340-5p	hsa-miR-7-5p	hsa-miR-185-5p	hsa-miR-22-3p	hsa-miR-744-5p	hsa-miR-193b-3p	hsa-miR-26b-5p	hsa-miR-484	hsa-miR-1225-3p	hsa-miR-615-3p	hsa-miR-331-3p	hsa-miR-93-3p	hsa-miR-196a-5p	hsa-miR-30b-5p	hsa-miR-24-3p	hsa-miR-342-3p	hsa-miR-122-5p	hsa-miR-324-5p	hsa-miR-21-5p	hsa-miR-10a-5p	hsa-miR-34a-5p	hsa-miR-186-5p	hsa-miR-92b-5p	hsa-miR-181d-5p	hsa-miR-1226-3p	hsa-let-7b-5p	hsa-miR-769-3p	hsa-miR-181b-5p	hsa-miR-98-5p	hsa-miR-769-5p	hsa-miR-23b-3p	hsa-miR-128-3p
WP229_Irinotecan_Pathway	Pathways	hsa-miR-125b-5p	hsa-miR-197-3p	hsa-miR-9-5p	hsa-miR-210-3p	hsa-miR-1-3p	hsa-miR-215-5p	hsa-miR-1254	hsa-miR-328-3p	hsa-miR-519c-3p	hsa-miR-33a-5p	hsa-miR-16-5p	hsa-miR-148a-3p	hsa-miR-7-5p	hsa-miR-26b-5p	hsa-miR-615-3p	hsa-miR-92a-3p	hsa-miR-21-5p	hsa-miR-339-5p	hsa-miR-10a-5p	hsa-miR-520h	hsa-miR-186-5p	hsa-let-7a-5p	hsa-let-7b-5p	hsa-miR-18a-3p	hsa-miR-98-5p	hsa-miR-23b-3p	hsa-miR-124-3p	hsa-miR-106b-5p	hsa-miR-192-5p	hsa-miR-27a-3p	hsa-miR-155-5p	hsa-miR-134-5p	hsa-miR-335-5p	hsa-miR-345-5p	hsa-miR-27b-3p
hsa05210_Colorectal_cancer	Pathways	hsa-miR-125b-5p	hsa-miR-210-3p	hsa-miR-150-5p	hsa-miR-199a-3p	hsa-miR-19b-1-5p	hsa-let-7a-5p	hsa-miR-96-5p	hsa-miR-141-3p	hsa-miR-877-3p	hsa-miR-33a-5p	hsa-miR-143-3p	hsa-miR-214-3p	hsa-miR-149-3p	hsa-miR-296-3p	hsa-miR-34c-5p	hsa-miR-22-3p	hsa-miR-26b-5p	hsa-miR-484	hsa-miR-204-5p	hsa-miR-497-5p	hsa-miR-196a-5p	hsa-miR-92a-3p	hsa-miR-342-3p	hsa-miR-182-5p	hsa-miR-324-5p	hsa-miR-520b	hsa-miR-361-5p	hsa-miR-24-2-5p	hsa-miR-338-3p	hsa-miR-483-3p	hsa-miR-423-5p	hsa-miR-181d-5p	hsa-miR-324-3p	hsa-miR-30d-5p	hsa-miR-98-5p	hsa-miR-92b-3p	hsa-miR-32-5p	hsa-miR-124-3p	hsa-miR-106b-5p	hsa-miR-766-3p	hsa-miR-1303	hsa-miR-181c-5p	hsa-miR-744-5p	hsa-miR-101-3p	hsa-miR-503-5p	hsa-miR-200c-3p	hsa-miR-18a-3p	hsa-miR-125a-5p
WP496_Steroid_Biosynthesis	Pathways	hsa-miR-124-3p	hsa-miR-26b-5p	hsa-miR-484	hsa-miR-155-5p	hsa-miR-335-5p	hsa-miR-181a-5p	hsa-miR-324-5p
hsa00290_Valine_leucine_and_isoleucine_biosynthesis	Pathways	hsa-miR-197-3p	hsa-miR-130b-5p	hsa-miR-215-5p	hsa-miR-196b-5p	hsa-miR-877-3p	hsa-miR-191-5p	hsa-miR-16-5p	hsa-miR-296-3p	hsa-miR-222-3p	hsa-miR-22-3p	hsa-let-7e-5p	hsa-miR-26b-5p	hsa-miR-484	hsa-miR-615-3p	hsa-miR-331-3p	hsa-miR-93-3p	hsa-miR-92a-3p	hsa-miR-324-3p	hsa-miR-324-5p	hsa-miR-21-5p	hsa-miR-326	hsa-miR-652-3p	hsa-miR-421	hsa-miR-760	hsa-let-7a-5p	hsa-let-7b-5p	hsa-miR-98-5p	hsa-miR-769-5p	hsa-miR-92b-3p	hsa-miR-32-5p	hsa-miR-106b-5p	hsa-miR-183-5p	hsa-miR-192-5p	hsa-miR-155-5p	hsa-miR-100-5p	hsa-miR-424-5p	hsa-miR-1260b
P04396_Vitamin_D_metabolism_and_pathway	Pathways	hsa-miR-125b-5p	hsa-miR-671-5p	hsa-miR-138-5p	hsa-miR-125a-5p	hsa-miR-26b-5p	hsa-miR-192-5p	hsa-miR-615-3p	hsa-miR-27b-3p	hsa-miR-215-5p	hsa-let-7a-5p	hsa-miR-30a-5p	hsa-miR-455-3p	hsa-miR-335-5p	hsa-miR-218-5p	hsa-miR-92a-3p	hsa-miR-31-5p	hsa-miR-16-5p	hsa-miR-500a-3p	hsa-miR-501-3p
P00045_Notch_signaling_pathway	Pathways	hsa-miR-18a-5p	hsa-miR-132-3p	hsa-miR-197-3p	hsa-miR-9-5p	hsa-miR-2110	hsa-miR-150-5p	hsa-miR-130b-5p	hsa-miR-149-5p	hsa-miR-524-5p	hsa-miR-1-3p	hsa-miR-30a-5p	hsa-miR-10b-5p	hsa-miR-25-3p	hsa-miR-29c-3p	hsa-miR-31-5p	hsa-miR-16-5p	hsa-miR-590-3p	hsa-miR-27a-3p	hsa-miR-129-5p	hsa-miR-296-3p	hsa-miR-222-3p	hsa-miR-744-5p	hsa-miR-26b-5p	hsa-miR-484	hsa-miR-148b-3p	hsa-miR-15a-5p	hsa-miR-93-3p	hsa-miR-196a-5p	hsa-miR-30b-5p	hsa-miR-92a-3p	hsa-miR-122-5p	hsa-miR-34c-5p	hsa-miR-21-5p	hsa-miR-326	hsa-miR-339-5p	hsa-miR-10a-5p	hsa-miR-562	hsa-miR-34a-5p	hsa-miR-145-5p	hsa-miR-24-3p	hsa-miR-17-5p	hsa-let-7b-5p	hsa-miR-181a-5p	hsa-miR-144-3p	hsa-miR-98-5p	hsa-miR-769-5p	hsa-miR-23b-3p	hsa-miR-128-3p
WP408_Oxidative_Stress	Pathways	hsa-miR-377-3p	hsa-miR-125b-5p	hsa-miR-139-5p	hsa-miR-197-3p	hsa-miR-671-5p	hsa-miR-9-5p	hsa-miR-210-3p	hsa-miR-218-5p	hsa-miR-149-5p	hsa-miR-1-3p	hsa-miR-215-5p	hsa-miR-663a	hsa-miR-30a-5p	hsa-miR-96-5p	hsa-miR-99b-5p	hsa-miR-141-3p	hsa-miR-146a-5p	hsa-miR-16-5p	hsa-miR-153-3p	hsa-miR-15b-5p	hsa-miR-186-5p	hsa-miR-24-3p	hsa-miR-222-3p	hsa-miR-22-3p	hsa-miR-744-5p	hsa-miR-133a-3p	hsa-miR-26b-5p	hsa-miR-342-3p	hsa-miR-15a-5p	hsa-miR-142-5p	hsa-miR-196a-5p	hsa-miR-30b-5p	hsa-miR-146b-5p	hsa-miR-92a-3p	hsa-miR-378a-3p	hsa-miR-122-5p	hsa-miR-223-3p	hsa-miR-21-5p	hsa-miR-199a-5p	hsa-miR-652-3p	hsa-miR-148b-3p	hsa-miR-125a-5p	hsa-miR-34a-5p	hsa-let-7a-5p	hsa-miR-221-3p	hsa-miR-296-3p	hsa-miR-199a-3p	hsa-miR-1226-3p
hsa00040_Pentose_and_glucuronate_interconversions	Pathways	hsa-miR-193b-3p	hsa-miR-9-5p	hsa-miR-24-3p	hsa-miR-32-5p	hsa-miR-92a-3p	hsa-miR-106b-5p	hsa-miR-26b-5p	hsa-miR-124-3p	hsa-miR-15a-5p	hsa-miR-34a-5p	hsa-miR-155-5p	hsa-miR-30a-5p	hsa-miR-760	hsa-miR-335-5p	hsa-miR-744-5p	hsa-miR-142-3p	hsa-miR-1226-3p	hsa-miR-16-5p	hsa-miR-1260b	hsa-miR-342-5p
hsa04210_Apoptosis	Pathways	hsa-miR-125b-5p	hsa-miR-210-3p	hsa-miR-150-5p	hsa-miR-24-2-5p	hsa-miR-1226-3p	hsa-miR-96-5p	hsa-miR-218-5p	hsa-miR-877-3p	hsa-miR-143-3p	hsa-miR-214-3p	hsa-miR-149-3p	hsa-miR-296-3p	hsa-miR-34c-5p	hsa-miR-22-3p	hsa-miR-26b-5p	hsa-miR-484	hsa-miR-204-5p	hsa-miR-196a-5p	hsa-miR-92a-3p	hsa-miR-182-5p	hsa-miR-324-5p	hsa-miR-1228-3p	hsa-miR-373-3p	hsa-miR-19b-1-5p	hsa-miR-532-3p	hsa-miR-181d-5p	hsa-miR-324-3p	hsa-miR-30d-5p	hsa-miR-98-5p	hsa-miR-320a	hsa-miR-124-3p	hsa-miR-106b-5p	hsa-miR-181c-5p	hsa-miR-744-5p	hsa-miR-101-3p	hsa-miR-151a-3p	hsa-miR-374a-5p	hsa-miR-200c-3p	hsa-miR-18a-3p	hsa-miR-125a-5p	hsa-miR-10b-5p	hsa-miR-302c-3p	hsa-miR-491-5p	hsa-miR-3144-3p	hsa-miR-25-3p	hsa-miR-30a-5p	hsa-miR-1285-3p	hsa-miR-148a-3p
P00041_Metabotropic_glutamate_receptor_group_I_pathway	Pathways	hsa-miR-9-5p	hsa-miR-125b-5p	hsa-let-7d-5p	hsa-miR-215-5p	hsa-miR-196b-5p	hsa-miR-96-5p	hsa-miR-10b-5p	hsa-miR-25-3p	hsa-miR-16-5p	hsa-miR-340-5p	hsa-miR-7-5p	hsa-miR-365a-3p	hsa-miR-22-3p	hsa-miR-155-5p	hsa-miR-26b-5p	hsa-miR-484	hsa-miR-204-5p	hsa-miR-331-3p	hsa-miR-142-3p	hsa-miR-1296-5p	hsa-miR-93-5p	hsa-miR-21-5p	hsa-miR-34a-5p	hsa-miR-186-5p	hsa-miR-296-3p	hsa-miR-19b-3p	hsa-miR-324-3p	hsa-miR-128-3p	hsa-miR-32-5p	hsa-miR-124-3p	hsa-miR-192-5p	hsa-miR-106b-3p	hsa-miR-744-5p	hsa-miR-335-5p	hsa-miR-424-5p	hsa-miR-375
WP289_Myometrial_Relaxation_and_Contraction_Pathways	Pathways	hsa-miR-125b-5p	hsa-miR-210-3p	hsa-miR-24-2-5p	hsa-miR-941	hsa-let-7a-5p	hsa-miR-96-5p	hsa-miR-218-5p	hsa-miR-877-3p	hsa-miR-33a-5p	hsa-miR-214-3p	hsa-miR-1914-3p	hsa-miR-671-5p	hsa-miR-324-3p	hsa-miR-26b-5p	hsa-miR-484	hsa-miR-615-3p	hsa-miR-196a-5p	hsa-miR-146b-5p	hsa-miR-92a-3p	hsa-miR-342-3p	hsa-miR-182-5p	hsa-miR-324-5p	hsa-miR-125a-5p	hsa-miR-219a-5p	hsa-miR-423-5p	hsa-miR-199a-3p	hsa-miR-98-5p	hsa-miR-92b-3p	hsa-miR-32-5p	hsa-miR-124-3p	hsa-miR-644a	hsa-miR-744-5p	hsa-miR-101-3p	hsa-miR-200c-3p	hsa-miR-18a-3p	hsa-miR-328-3p	hsa-miR-139-5p	hsa-miR-625-5p	hsa-miR-30a-3p	hsa-miR-877-5p	hsa-miR-425-5p	hsa-miR-455-3p	hsa-miR-30e-3p	hsa-miR-148a-3p	hsa-miR-15b-5p	hsa-miR-99a-5p	hsa-miR-7-5p	hsa-miR-1227-3p
P00060_Ubiquitin_proteasome_pathway	Pathways	hsa-miR-125b-5p	hsa-miR-210-3p	hsa-miR-125a-5p	hsa-miR-1226-3p	hsa-miR-96-5p	hsa-miR-877-3p	hsa-miR-143-3p	hsa-miR-26b-5p	hsa-miR-484	hsa-miR-615-3p	hsa-miR-196a-5p	hsa-miR-188-5p	hsa-miR-1229-3p	hsa-miR-92a-3p	hsa-miR-182-5p	hsa-miR-324-5p	hsa-miR-140-3p	hsa-miR-423-5p	hsa-miR-98-5p	hsa-miR-32-5p	hsa-miR-124-3p	hsa-miR-106b-5p	hsa-miR-744-5p	hsa-miR-101-3p	hsa-miR-30c-5p	hsa-miR-1254	hsa-miR-15b-5p	hsa-miR-99a-5p	hsa-miR-24-3p	hsa-miR-26a-5p	hsa-miR-15a-5p	hsa-miR-324-3p	hsa-miR-93-5p	hsa-miR-221-3p	hsa-miR-760	hsa-miR-605-5p	hsa-miR-941	hsa-miR-23b-3p	hsa-miR-423-3p	hsa-miR-200a-3p	hsa-miR-320c	hsa-miR-320a	hsa-miR-27b-3p	hsa-miR-18a-5p	hsa-let-7g-5p	hsa-miR-671-5p	hsa-miR-1180-3p	hsa-miR-18b-5p
hsa00062_Fatty_acid_elongation_in_mitochondria	Pathways	hsa-miR-1229-3p	hsa-miR-152-3p	hsa-miR-1-3p	hsa-miR-215-5p	hsa-miR-877-5p	hsa-miR-151a-3p	hsa-miR-877-3p	hsa-miR-16-5p	hsa-miR-15b-5p	hsa-miR-99a-5p	hsa-miR-193b-3p	hsa-miR-26b-5p	hsa-miR-484	hsa-miR-615-3p	hsa-miR-331-3p	hsa-miR-92a-3p	hsa-miR-29a-3p	hsa-miR-29c-3p	hsa-let-7f-1-3p	hsa-miR-186-5p	hsa-let-7b-5p	hsa-miR-98-5p	hsa-miR-339-5p	hsa-miR-124-3p	hsa-miR-192-5p	hsa-miR-155-5p	hsa-miR-320a	hsa-miR-421
hsa00603_Glycosphingolipid_biosynthesis___globo_series	Pathways	hsa-miR-132-3p	hsa-miR-769-5p	hsa-miR-21-5p	hsa-miR-193b-3p	hsa-miR-26b-5p	hsa-miR-484	hsa-miR-192-5p	hsa-miR-615-3p	hsa-miR-331-3p	hsa-miR-215-5p	hsa-miR-204-5p	hsa-miR-324-3p	hsa-miR-375	hsa-miR-760	hsa-miR-335-5p
hsa04514_Cell_adhesion_molecules_CAMs	Pathways	hsa-miR-210-3p	hsa-miR-125a-5p	hsa-miR-218-5p	hsa-miR-877-3p	hsa-miR-296-3p	hsa-miR-26b-5p	hsa-miR-484	hsa-miR-615-3p	hsa-miR-196a-5p	hsa-miR-92a-3p	hsa-miR-486-5p	hsa-miR-19b-1-5p	hsa-miR-766-3p	hsa-miR-98-5p	hsa-miR-32-5p	hsa-miR-124-3p	hsa-miR-106b-5p	hsa-miR-27b-5p	hsa-miR-744-5p	hsa-miR-513a-5p	hsa-miR-10b-5p	hsa-miR-9-3p	hsa-miR-1256	hsa-miR-30c-5p	hsa-miR-30a-5p	hsa-miR-455-3p	hsa-miR-148a-3p	hsa-miR-15b-5p	hsa-miR-24-3p	hsa-miR-1260b	hsa-miR-26a-5p	hsa-miR-15a-5p	hsa-miR-421	hsa-miR-93-5p	hsa-miR-29a-3p	hsa-miR-148b-3p	hsa-miR-221-3p	hsa-miR-194-5p	hsa-miR-146a-5p	hsa-miR-29b-3p	hsa-miR-769-5p	hsa-miR-423-3p	hsa-miR-200a-3p	hsa-miR-138-5p	hsa-miR-335-5p	hsa-miR-320a	hsa-miR-224-5p	hsa-miR-132-3p
hsa04940_Type_I_diabetes_mellitus	Pathways	hsa-miR-9-5p	hsa-miR-197-3p	hsa-miR-125b-5p	hsa-miR-152-3p	hsa-miR-1-3p	hsa-miR-204-5p	hsa-miR-191-5p	hsa-miR-331-3p	hsa-let-7e-5p	hsa-miR-148a-3p	hsa-miR-15b-5p	hsa-miR-296-3p	hsa-miR-16-5p	hsa-miR-26b-5p	hsa-miR-484	hsa-miR-15a-5p	hsa-miR-615-3p	hsa-miR-214-3p	hsa-miR-92a-3p	hsa-miR-122-5p	hsa-miR-324-5p	hsa-miR-409-3p	hsa-miR-21-5p	hsa-miR-148b-3p	hsa-miR-504-5p	hsa-miR-17-5p	hsa-miR-146a-5p	hsa-miR-203a-3p	hsa-miR-98-5p	hsa-miR-29b-3p	hsa-miR-423-3p	hsa-miR-124-3p	hsa-miR-183-5p	hsa-miR-181c-5p	hsa-miR-744-5p	hsa-miR-335-5p	hsa-miR-18a-3p	hsa-miR-106a-5p
WP666_Hypothetical_Network_for_Drug_Addiction	Pathways	hsa-miR-203a-3p	hsa-miR-28-5p	hsa-miR-125b-5p	hsa-miR-497-5p	hsa-miR-1-3p	hsa-miR-215-5p	hsa-miR-877-5p	hsa-miR-196b-5p	hsa-miR-96-5p	hsa-miR-30c-5p	hsa-miR-31-5p	hsa-miR-16-5p	hsa-miR-15b-5p	hsa-miR-7-5p	hsa-miR-365a-3p	hsa-miR-22-3p	hsa-miR-93-3p	hsa-miR-26b-5p	hsa-miR-484	hsa-miR-331-3p	hsa-miR-205-5p	hsa-miR-342-3p	hsa-miR-122-5p	hsa-miR-182-5p	hsa-miR-320b	hsa-miR-590-3p	hsa-miR-21-5p	hsa-miR-424-5p	hsa-miR-200b-3p	hsa-miR-483-5p	hsa-miR-361-5p	hsa-miR-34a-5p	hsa-miR-766-3p	hsa-miR-186-5p	hsa-miR-504-5p	hsa-miR-199a-3p	hsa-let-7b-5p	hsa-miR-181a-5p	hsa-miR-181b-5p	hsa-miR-92b-3p	hsa-miR-769-5p	hsa-miR-128-3p	hsa-miR-423-3p	hsa-miR-124-3p	hsa-miR-192-5p	hsa-miR-30a-5p	hsa-miR-34b-5p	hsa-miR-27a-3p
P04384_Gamma_aminobutyric_acid_synthesis	Pathways	hsa-miR-24-3p	hsa-miR-192-5p	hsa-miR-215-5p	hsa-miR-155-5p	hsa-miR-335-5p	hsa-miR-30c-5p
hsa00512_O_Glycan_biosynthesis	Pathways	hsa-miR-132-3p	hsa-miR-125b-5p	hsa-miR-99b-3p	hsa-miR-215-5p	hsa-let-7a-5p	hsa-miR-30a-5p	hsa-miR-615-3p	hsa-miR-16-5p	hsa-miR-214-3p	hsa-miR-340-5p	hsa-miR-129-5p	hsa-miR-7-5p	hsa-miR-374b-5p	hsa-miR-760	hsa-miR-484	hsa-miR-204-5p	hsa-miR-148b-3p	hsa-miR-324-3p	hsa-miR-122-5p	hsa-miR-10a-5p	hsa-miR-1226-3p	hsa-let-7b-5p	hsa-miR-181a-5p	hsa-miR-98-5p	hsa-miR-29b-3p	hsa-miR-17-3p	hsa-miR-378a-3p	hsa-miR-124-3p	hsa-miR-192-5p	hsa-miR-27b-3p	hsa-miR-335-5p	hsa-miR-503-5p	hsa-miR-375	hsa-miR-26b-5p
hsa05330_Allograft_rejection	Pathways	hsa-miR-9-5p	hsa-miR-203a-3p	hsa-miR-152-3p	hsa-miR-486-5p	hsa-let-7e-5p	hsa-miR-148a-3p	hsa-miR-15b-5p	hsa-miR-296-3p	hsa-miR-16-5p	hsa-miR-26b-5p	hsa-miR-484	hsa-miR-15a-5p	hsa-miR-615-3p	hsa-miR-92a-3p	hsa-miR-122-5p	hsa-miR-409-3p	hsa-miR-21-5p	hsa-miR-148b-3p	hsa-miR-504-5p	hsa-miR-146a-5p	hsa-miR-98-5p	hsa-miR-29b-3p	hsa-miR-423-3p	hsa-miR-124-3p	hsa-miR-183-5p	hsa-miR-181c-5p	hsa-miR-335-5p	hsa-miR-454-5p	hsa-miR-224-5p	hsa-miR-106a-5p
WP422_MAPK_Cascade	Pathways	hsa-miR-132-3p	hsa-miR-125b-5p	hsa-let-7g-5p	hsa-miR-197-3p	hsa-miR-9-5p	hsa-miR-497-5p	hsa-miR-192-5p	hsa-miR-17-5p	hsa-miR-149-5p	hsa-miR-1-3p	hsa-miR-30c-5p	hsa-miR-30a-5p	hsa-miR-425-5p	hsa-miR-96-5p	hsa-miR-424-5p	hsa-miR-141-3p	hsa-miR-877-3p	hsa-miR-191-5p	hsa-miR-16-5p	hsa-miR-93-3p	hsa-miR-28-5p	hsa-miR-15b-5p	hsa-miR-24-3p	hsa-miR-155-5p	hsa-miR-193b-3p	hsa-miR-143-3p	hsa-miR-26b-5p	hsa-miR-26a-5p	hsa-miR-15a-5p	hsa-miR-615-3p	hsa-miR-331-3p	hsa-miR-217	hsa-miR-483-5p	hsa-miR-92a-3p	hsa-miR-342-3p	hsa-miR-214-3p	hsa-miR-93-5p	hsa-miR-320b	hsa-miR-769-5p	hsa-miR-21-5p	hsa-miR-520b	hsa-miR-29c-3p	hsa-miR-622	hsa-miR-148b-3p	hsa-miR-125a-5p	hsa-miR-34a-5p	hsa-miR-766-3p	hsa-miR-145-5p
P00040_Metabotropic_glutamate_receptor_group_II_pathway	Pathways	hsa-miR-9-5p	hsa-miR-148a-3p	hsa-miR-130b-3p	hsa-miR-197-3p	hsa-miR-210-3p	hsa-miR-1-3p	hsa-miR-215-5p	hsa-miR-25-3p	hsa-miR-30a-5p	hsa-miR-100-5p	hsa-miR-96-5p	hsa-miR-204-5p	hsa-miR-30d-5p	hsa-miR-877-3p	hsa-miR-16-5p	hsa-miR-769-3p	hsa-miR-590-3p	hsa-miR-7-5p	hsa-miR-365a-3p	hsa-miR-22-3p	hsa-miR-330-5p	hsa-miR-155-5p	hsa-miR-193b-3p	hsa-let-7e-5p	hsa-miR-26b-5p	hsa-miR-484	hsa-miR-935	hsa-miR-331-3p	hsa-miR-505-3p	hsa-miR-1296-5p	hsa-miR-93-5p	hsa-miR-324-5p	hsa-miR-21-5p	hsa-miR-1260b	hsa-miR-29c-3p	hsa-miR-148b-3p	hsa-miR-19b-3p	hsa-miR-186-5p	hsa-miR-423-5p	hsa-miR-34a-5p	hsa-miR-30e-5p	hsa-miR-17-5p	hsa-let-7b-5p	hsa-miR-181a-5p	hsa-miR-98-5p	hsa-miR-128-3p	hsa-miR-92b-3p	hsa-miR-124-3p
WP561_Heme_Biosynthesis	Pathways	hsa-miR-15b-5p	hsa-miR-222-3p	hsa-miR-423-3p	hsa-miR-16-5p	hsa-miR-124-3p	hsa-miR-1301-3p	hsa-miR-484	hsa-miR-361-5p	hsa-miR-19b-3p	hsa-miR-1-3p	hsa-miR-25-3p	hsa-miR-30a-5p	hsa-miR-10b-5p	hsa-miR-142-3p	hsa-miR-30c-5p	hsa-miR-29b-2-5p	hsa-miR-937-3p	hsa-miR-375	hsa-miR-98-5p	hsa-miR-92b-3p
P02738_De_novo_purine_biosynthesis	Pathways	hsa-miR-125b-5p	hsa-let-7g-5p	hsa-miR-26a-5p	hsa-miR-28-5p	hsa-miR-1180-3p	hsa-miR-125a-5p	hsa-miR-1-3p	hsa-miR-215-5p	hsa-miR-30c-5p	hsa-miR-30a-5p	hsa-miR-100-5p	hsa-miR-96-5p	hsa-miR-10b-5p	hsa-miR-877-3p	hsa-miR-192-5p	hsa-miR-16-5p	hsa-miR-197-3p	hsa-miR-186-5p	hsa-miR-24-3p	hsa-miR-330-5p	hsa-miR-155-5p	hsa-let-7e-5p	hsa-miR-324-3p	hsa-miR-26b-5p	hsa-miR-484	hsa-miR-1301-3p	hsa-miR-615-3p	hsa-miR-93-3p	hsa-miR-30b-5p	hsa-miR-1229-3p	hsa-miR-92a-3p	hsa-miR-342-3p	hsa-miR-93-5p	hsa-miR-29a-3p	hsa-miR-450b-5p	hsa-miR-378a-5p	hsa-miR-193b-3p	hsa-miR-142-3p	hsa-miR-10a-5p	hsa-let-7i-5p	hsa-miR-148b-3p	hsa-miR-19b-3p	hsa-miR-221-3p	hsa-miR-423-5p	hsa-miR-34a-5p	hsa-miR-17-5p	hsa-let-7a-5p	hsa-let-7b-5p
P00039_Metabotropic_glutamate_receptor_group_III_pathway	Pathways	hsa-miR-125b-5p	hsa-miR-148a-3p	hsa-miR-197-3p	hsa-miR-18b-5p	hsa-miR-1-3p	hsa-miR-215-5p	hsa-miR-130b-3p	hsa-miR-30a-5p	hsa-miR-100-5p	hsa-miR-96-5p	hsa-miR-25-3p	hsa-let-7e-5p	hsa-miR-769-3p	hsa-miR-590-3p	hsa-miR-7-5p	hsa-miR-365a-3p	hsa-miR-22-3p	hsa-miR-330-5p	hsa-miR-155-5p	hsa-miR-193b-3p	hsa-miR-16-5p	hsa-miR-26b-5p	hsa-miR-484	hsa-miR-505-3p	hsa-miR-204-5p	hsa-miR-331-3p	hsa-miR-196a-5p	hsa-miR-1296-5p	hsa-miR-93-5p	hsa-miR-324-5p	hsa-miR-21-5p	hsa-miR-1260b	hsa-miR-29c-3p	hsa-miR-34a-5p	hsa-miR-186-5p	hsa-miR-423-5p	hsa-miR-19b-3p	hsa-miR-17-5p	hsa-let-7b-5p	hsa-miR-181a-5p	hsa-miR-181b-5p	hsa-miR-98-5p	hsa-miR-128-3p	hsa-miR-92b-3p	hsa-miR-124-3p	hsa-miR-192-5p	hsa-miR-589-3p	hsa-miR-27b-3p
P04386_Histamine_H2_receptor_mediated_signaling_pathway	Pathways	hsa-miR-197-3p	hsa-miR-1-3p	hsa-miR-130b-3p	hsa-miR-30a-5p	hsa-miR-100-5p	hsa-let-7e-5p	hsa-miR-148a-3p	hsa-miR-590-3p	hsa-miR-99a-5p	hsa-miR-365a-3p	hsa-miR-22-3p	hsa-miR-1260b	hsa-miR-16-5p	hsa-miR-26b-5p	hsa-miR-484	hsa-miR-331-3p	hsa-miR-155-5p	hsa-miR-93-5p	hsa-miR-324-5p	hsa-miR-21-5p	hsa-miR-29c-3p	hsa-miR-10a-5p	hsa-miR-19b-3p	hsa-miR-186-5p	hsa-miR-423-5p	hsa-miR-17-5p	hsa-let-7b-5p	hsa-miR-769-3p	hsa-miR-98-5p	hsa-miR-128-3p	hsa-miR-92b-3p	hsa-miR-124-3p	hsa-miR-589-3p	hsa-miR-27b-3p	hsa-miR-27a-3p	hsa-miR-744-5p	hsa-miR-101-3p	hsa-miR-196b-5p	hsa-miR-23a-3p	hsa-miR-335-5p	hsa-miR-425-5p	hsa-miR-375	hsa-miR-106a-5p	hsa-miR-103a-3p
P05734_Synaptic_vesicle_trafficking	Pathways	hsa-miR-125b-2-3p	hsa-miR-1-3p	hsa-miR-215-5p	hsa-miR-877-3p	hsa-miR-100-5p	hsa-miR-10b-5p	hsa-let-7b-5p	hsa-miR-25-3p	hsa-miR-16-5p	hsa-miR-15b-5p	hsa-miR-330-5p	hsa-miR-193b-3p	hsa-miR-26b-5p	hsa-miR-92a-3p	hsa-miR-34a-5p	hsa-miR-221-3p	hsa-miR-146a-5p	hsa-miR-3200-3p	hsa-miR-128-3p	hsa-miR-378a-3p	hsa-miR-124-3p	hsa-miR-192-5p	hsa-miR-335-5p	hsa-miR-320a	hsa-miR-375	hsa-miR-103a-3p
P02749_Leucine_biosynthesis	Pathways	hsa-miR-769-5p	hsa-miR-21-5p	hsa-miR-32-5p	hsa-miR-484	hsa-miR-615-3p	hsa-miR-155-5p	hsa-let-7a-5p	hsa-let-7b-5p
hsa04960_Aldosterone_regulated_sodium_reabsorption	Pathways	hsa-miR-125b-5p	hsa-miR-125a-5p	hsa-miR-96-5p	hsa-miR-33a-5p	hsa-miR-143-3p	hsa-miR-296-3p	hsa-miR-26b-5p	hsa-miR-484	hsa-miR-615-3p	hsa-miR-196a-5p	hsa-miR-92a-3p	hsa-miR-24-2-5p	hsa-miR-766-3p	hsa-miR-423-5p	hsa-miR-199a-3p	hsa-miR-30d-5p	hsa-miR-98-5p	hsa-miR-92b-3p	hsa-miR-124-3p	hsa-miR-181c-5p	hsa-miR-744-5p	hsa-miR-18a-3p	hsa-miR-30a-5p	hsa-miR-148a-3p	hsa-miR-15b-5p	hsa-miR-99a-5p	hsa-miR-7-5p	hsa-miR-26a-5p	hsa-miR-622	hsa-miR-1296-5p	hsa-miR-93-5p	hsa-miR-29a-3p	hsa-miR-652-3p	hsa-miR-148b-3p	hsa-miR-483-5p	hsa-miR-19b-3p	hsa-miR-769-5p	hsa-miR-23b-3p	hsa-miR-133a-3p	hsa-miR-423-3p	hsa-miR-320b	hsa-miR-320a	hsa-miR-760	hsa-miR-18a-5p	hsa-let-7g-5p	hsa-miR-28-5p	hsa-miR-376a-3p	hsa-miR-152-3p
WP1603_Nicotine_Activity_on_Chromaffin_Cells	Pathways	hsa-miR-133a-3p	hsa-miR-335-5p
P02744_Fructose_galactose_metabolism	Pathways	hsa-miR-23b-3p	hsa-miR-346	hsa-miR-92b-3p	hsa-miR-378a-3p	hsa-miR-124-3p	hsa-miR-1260b	hsa-miR-1301-3p	hsa-miR-615-3p	hsa-miR-148a-5p	hsa-miR-196b-5p	hsa-miR-335-5p	hsa-miR-197-3p	hsa-miR-324-3p	hsa-miR-122-5p	hsa-miR-375	hsa-miR-26b-5p	hsa-miR-1225-5p	hsa-miR-324-5p
P02785_Valine_biosynthesis	Pathways	hsa-miR-769-5p	hsa-miR-125b-5p	hsa-miR-21-5p	hsa-miR-32-5p	hsa-miR-23b-3p	hsa-miR-193b-3p	hsa-miR-484	hsa-miR-615-3p	hsa-miR-1-3p	hsa-miR-155-5p	hsa-let-7a-5p	hsa-let-7b-5p
hsa05416_Viral_myocarditis	Pathways	hsa-miR-125b-5p	hsa-miR-19b-1-5p	hsa-let-7a-5p	hsa-miR-96-5p	hsa-miR-877-3p	hsa-miR-296-3p	hsa-miR-34c-5p	hsa-miR-26b-5p	hsa-miR-484	hsa-miR-615-3p	hsa-miR-196a-5p	hsa-miR-302a-3p	hsa-miR-92a-3p	hsa-miR-342-3p	hsa-miR-324-5p	hsa-miR-486-5p	hsa-miR-520b	hsa-miR-140-3p	hsa-miR-338-3p	hsa-miR-423-5p	hsa-miR-324-3p	hsa-miR-30d-5p	hsa-miR-98-5p	hsa-miR-320a	hsa-miR-92b-3p	hsa-miR-124-3p	hsa-miR-106b-5p	hsa-miR-1303	hsa-miR-744-5p	hsa-miR-101-3p	hsa-miR-503-5p	hsa-miR-18a-3p	hsa-miR-302c-3p	hsa-miR-192-5p	hsa-miR-1256	hsa-miR-30c-5p	hsa-miR-30a-5p	hsa-miR-455-3p	hsa-miR-151a-5p	hsa-miR-148a-3p	hsa-miR-15b-5p	hsa-miR-7-5p	hsa-miR-1227-3p	hsa-miR-1260b	hsa-miR-26a-5p	hsa-miR-15a-5p	hsa-miR-296-5p	hsa-miR-421
WP176_Folate_Metabolism	Pathways	hsa-miR-125b-5p	hsa-miR-210-3p	hsa-miR-150-5p	hsa-miR-125a-5p	hsa-miR-130b-3p	hsa-miR-96-5p	hsa-miR-877-3p	hsa-miR-33a-5p	hsa-miR-143-3p	hsa-miR-214-3p	hsa-miR-373-3p	hsa-miR-26b-5p	hsa-miR-484	hsa-miR-615-3p	hsa-miR-92a-3p	hsa-miR-342-3p	hsa-miR-324-5p	hsa-miR-409-3p	hsa-miR-423-5p	hsa-miR-30d-5p	hsa-miR-98-5p	hsa-miR-92b-3p	hsa-miR-124-3p	hsa-miR-106b-5p	hsa-miR-181c-5p	hsa-miR-744-5p	hsa-miR-503-5p	hsa-miR-18a-3p	hsa-miR-10b-5p	hsa-miR-1256	hsa-miR-25-3p	hsa-miR-30a-5p	hsa-miR-1285-3p	hsa-miR-15b-5p	hsa-miR-99a-5p	hsa-miR-7-5p	hsa-miR-146b-5p	hsa-miR-26a-5p	hsa-miR-15a-5p	hsa-miR-421	hsa-miR-93-5p	hsa-miR-652-3p	hsa-miR-148b-3p	hsa-miR-221-3p	hsa-miR-34a-5p	hsa-miR-146a-5p	hsa-miR-605-5p	hsa-miR-940
hsa04910_Insulin_signaling_pathway	Pathways	hsa-miR-125b-5p	hsa-miR-2110	hsa-miR-210-3p	hsa-miR-199a-3p	hsa-miR-125a-5p	hsa-miR-130b-3p	hsa-miR-96-5p	hsa-miR-218-5p	hsa-miR-877-3p	hsa-miR-942-5p	hsa-miR-143-3p	hsa-miR-214-3p	hsa-miR-149-3p	hsa-miR-296-3p	hsa-miR-22-3p	hsa-miR-622	hsa-miR-26b-5p	hsa-miR-484	hsa-miR-615-3p	hsa-miR-376a-3p	hsa-miR-196a-5p	hsa-miR-1180-3p	hsa-miR-92a-3p	hsa-miR-182-5p	hsa-miR-320b	hsa-miR-140-3p	hsa-miR-766-3p	hsa-miR-421	hsa-miR-423-5p	hsa-miR-181d-5p	hsa-miR-324-3p	hsa-miR-144-3p	hsa-miR-98-5p	hsa-let-7i-5p	hsa-miR-92b-3p	hsa-miR-32-5p	hsa-miR-1303	hsa-miR-106b-5p	hsa-miR-124-3p	hsa-miR-129-1-3p	hsa-miR-744-5p	hsa-miR-101-3p	hsa-miR-196b-5p	hsa-miR-92a-1-5p	hsa-miR-200c-3p	hsa-miR-18a-3p	hsa-miR-302c-3p	hsa-miR-181c-5p
hsa05016_Huntingtons_disease	Pathways	hsa-miR-125b-5p	hsa-miR-210-3p	hsa-miR-150-5p	hsa-miR-186-3p	hsa-miR-19b-1-5p	hsa-let-7a-5p	hsa-miR-218-5p	hsa-miR-877-3p	hsa-miR-15a-3p	hsa-miR-214-3p	hsa-miR-3181	hsa-miR-99a-3p	hsa-miR-26b-5p	hsa-miR-484	hsa-miR-615-3p	hsa-miR-196a-5p	hsa-miR-1180-3p	hsa-miR-92a-3p	hsa-miR-342-3p	hsa-miR-182-5p	hsa-miR-324-5p	hsa-miR-125a-5p	hsa-miR-532-3p	hsa-miR-483-3p	hsa-miR-505-5p	hsa-miR-423-5p	hsa-miR-181d-5p	hsa-miR-1296-5p	hsa-miR-30d-5p	hsa-miR-98-5p	hsa-miR-92b-3p	hsa-miR-32-5p	hsa-miR-124-3p	hsa-miR-106b-5p	hsa-miR-3198	hsa-miR-744-5p	hsa-miR-101-3p	hsa-miR-374a-5p	hsa-miR-503-5p	hsa-miR-200c-3p	hsa-miR-18a-3p	hsa-miR-328-3p	hsa-miR-125b-2-3p	hsa-miR-130b-5p	hsa-miR-625-5p	hsa-miR-30a-3p	hsa-miR-30a-5p	hsa-miR-455-3p
WP1600_Nicotine_metabolism	Pathways	hsa-miR-26b-5p	hsa-let-7e-5p
WP366_TGF_beta_Signaling_Pathway1	Pathways	hsa-miR-125b-5p	hsa-miR-150-5p	hsa-miR-19b-1-5p	hsa-miR-941	hsa-miR-1226-3p	hsa-miR-9-3p	hsa-miR-30a-3p	hsa-miR-33a-5p	hsa-miR-143-3p	hsa-miR-214-3p	hsa-miR-149-3p	hsa-miR-296-3p	hsa-miR-34c-5p	hsa-miR-22-3p	hsa-miR-324-3p	hsa-miR-26b-5p	hsa-miR-484	hsa-miR-615-3p	hsa-miR-497-5p	hsa-miR-196a-5p	hsa-miR-188-5p	hsa-miR-361-3p	hsa-miR-1180-3p	hsa-miR-92a-3p	hsa-miR-342-3p	hsa-miR-182-5p	hsa-miR-324-5p	hsa-miR-520b	hsa-miR-218-5p	hsa-miR-125a-5p	hsa-miR-338-3p	hsa-miR-483-3p	hsa-miR-421	hsa-miR-423-5p	hsa-miR-181d-5p	hsa-miR-199a-3p	hsa-miR-30d-5p	hsa-miR-500a-3p	hsa-miR-98-5p	hsa-miR-320a	hsa-miR-498	hsa-miR-92b-3p	hsa-miR-454-3p	hsa-miR-124-3p	hsa-miR-106b-5p	hsa-miR-766-3p	hsa-miR-744-5p	hsa-miR-101-3p
WP47_Hedgehog_Signaling_Pathway	Pathways	hsa-miR-125b-5p	hsa-miR-1-3p	hsa-miR-877-5p	hsa-miR-455-3p	hsa-miR-31-5p	hsa-miR-26b-5p	hsa-miR-484	hsa-miR-1301-3p	hsa-miR-331-3p	hsa-miR-93-3p	hsa-miR-196a-5p	hsa-miR-142-3p	hsa-miR-92a-3p	hsa-miR-324-3p	hsa-miR-93-5p	hsa-miR-324-5p	hsa-miR-494-3p	hsa-miR-326	hsa-miR-148b-3p	hsa-miR-338-3p	hsa-miR-378a-5p	hsa-miR-92b-3p	hsa-miR-378a-3p	hsa-miR-124-3p	hsa-miR-155-5p	hsa-miR-335-5p	hsa-miR-212-3p	hsa-miR-342-5p
hsa04722_Neurotrophin_signaling_pathway	Pathways	hsa-miR-125b-5p	hsa-miR-1910-5p	hsa-miR-210-3p	hsa-miR-150-5p	hsa-miR-24-2-5p	hsa-miR-193a-5p	hsa-miR-1226-3p	hsa-miR-96-5p	hsa-miR-218-5p	hsa-miR-877-3p	hsa-miR-33a-5p	hsa-miR-143-3p	hsa-miR-214-3p	hsa-miR-149-3p	hsa-miR-296-3p	hsa-miR-34c-5p	hsa-miR-22-3p	hsa-miR-26b-5p	hsa-miR-484	hsa-miR-204-5p	hsa-miR-765	hsa-miR-376a-3p	hsa-miR-196a-5p	hsa-miR-1180-3p	hsa-miR-92a-3p	hsa-miR-342-3p	hsa-miR-182-5p	hsa-miR-1914-3p	hsa-miR-19a-3p	hsa-miR-373-3p	hsa-miR-125a-5p	hsa-miR-219a-5p	hsa-miR-766-3p	hsa-miR-423-5p	hsa-miR-181d-5p	hsa-miR-509-3p	hsa-miR-199a-3p	hsa-miR-30d-5p	hsa-miR-98-5p	hsa-miR-10b-5p	hsa-miR-92b-3p	hsa-miR-32-5p	hsa-miR-124-3p	hsa-miR-106b-5p	hsa-miR-1303	hsa-miR-181c-5p	hsa-miR-744-5p	hsa-miR-101-3p
P00029_Huntington_disease	Pathways	hsa-miR-125b-5p	hsa-miR-2110	hsa-miR-210-3p	hsa-miR-150-5p	hsa-miR-199a-3p	hsa-miR-19b-1-5p	hsa-miR-193a-5p	hsa-miR-130b-3p	hsa-miR-96-5p	hsa-miR-141-3p	hsa-miR-877-3p	hsa-miR-143-3p	hsa-miR-214-3p	hsa-miR-149-3p	hsa-miR-296-3p	hsa-miR-22-3p	hsa-miR-99a-3p	hsa-miR-26b-5p	hsa-miR-484	hsa-miR-615-3p	hsa-miR-196a-5p	hsa-miR-302a-3p	hsa-miR-92a-3p	hsa-miR-342-3p	hsa-miR-124-3p	hsa-miR-182-5p	hsa-miR-324-5p	hsa-miR-125a-5p	hsa-miR-501-5p	hsa-miR-766-3p	hsa-miR-423-5p	hsa-miR-181d-5p	hsa-miR-324-3p	hsa-miR-30d-5p	hsa-miR-92b-3p	hsa-miR-644a	hsa-miR-106b-5p	hsa-miR-1303	hsa-miR-744-5p	hsa-miR-101-3p	hsa-miR-196b-5p	hsa-miR-374a-5p	hsa-miR-92a-1-5p	hsa-miR-200c-3p	hsa-miR-18a-3p	hsa-miR-342-5p	hsa-miR-302c-3p	hsa-miR-130b-5p
hsa04115_p53_signaling_pathway	Pathways	hsa-miR-125b-5p	hsa-miR-150-5p	hsa-miR-19b-1-5p	hsa-miR-193a-5p	hsa-miR-96-5p	hsa-miR-218-5p	hsa-miR-877-3p	hsa-miR-942-5p	hsa-miR-143-3p	hsa-miR-214-3p	hsa-miR-296-3p	hsa-miR-34c-5p	hsa-miR-22-3p	hsa-miR-26b-5p	hsa-miR-484	hsa-miR-615-3p	hsa-miR-885-5p	hsa-miR-196a-5p	hsa-miR-1229-3p	hsa-miR-92a-3p	hsa-miR-342-3p	hsa-miR-182-5p	hsa-miR-324-5p	hsa-miR-520b	hsa-miR-125a-5p	hsa-miR-338-3p	hsa-miR-766-3p	hsa-miR-505-5p	hsa-miR-423-5p	hsa-miR-1296-5p	hsa-miR-30d-5p	hsa-miR-144-3p	hsa-miR-98-5p	hsa-miR-657	hsa-miR-32-5p	hsa-miR-124-3p	hsa-miR-106b-5p	hsa-miR-1303	hsa-miR-744-5p	hsa-miR-101-3p	hsa-miR-374a-5p	hsa-miR-503-5p	hsa-miR-200c-3p	hsa-miR-18a-3p	hsa-miR-302c-3p	hsa-miR-520a-3p	hsa-miR-3144-3p	hsa-miR-30a-3p
WP734_Serotonin_Receptor_4_6_7_and_NR3C_Signaling	Pathways	hsa-miR-18a-5p	hsa-miR-203a-3p	hsa-miR-23a-5p	hsa-miR-497-5p	hsa-miR-1229-3p	hsa-miR-1-3p	hsa-miR-215-5p	hsa-miR-130b-3p	hsa-miR-30c-5p	hsa-miR-191-5p	hsa-miR-19a-3p	hsa-let-7e-5p	hsa-miR-148a-3p	hsa-miR-590-3p	hsa-miR-7-5p	hsa-miR-22-3p	hsa-miR-155-5p	hsa-miR-193b-3p	hsa-miR-26b-5p	hsa-miR-484	hsa-miR-615-3p	hsa-miR-331-3p	hsa-miR-93-3p	hsa-miR-421	hsa-miR-324-3p	hsa-miR-122-5p	hsa-miR-182-5p	hsa-miR-335-5p	hsa-miR-93-5p	hsa-miR-424-5p	hsa-miR-200b-3p	hsa-miR-483-5p	hsa-miR-19b-3p	hsa-miR-186-5p	hsa-miR-34a-5p	hsa-miR-17-5p	hsa-miR-92a-3p	hsa-let-7b-5p	hsa-miR-181a-5p	hsa-miR-378a-5p	hsa-miR-128-3p	hsa-miR-423-3p	hsa-miR-32-5p	hsa-miR-124-3p	hsa-miR-183-5p	hsa-miR-192-5p	hsa-miR-34b-5p	hsa-miR-27a-3p
WP1403_AMPK_signaling	Pathways	hsa-miR-125b-5p	hsa-miR-2110	hsa-miR-150-5p	hsa-miR-125a-5p	hsa-miR-130b-3p	hsa-miR-96-5p	hsa-miR-30d-5p	hsa-miR-877-3p	hsa-miR-942-5p	hsa-miR-143-3p	hsa-miR-214-3p	hsa-miR-149-3p	hsa-miR-296-3p	hsa-miR-34c-5p	hsa-miR-26b-5p	hsa-miR-484	hsa-miR-615-3p	hsa-miR-765	hsa-miR-196a-5p	hsa-miR-1229-3p	hsa-miR-92a-3p	hsa-miR-342-3p	hsa-miR-182-5p	hsa-miR-324-5p	hsa-miR-520b	hsa-miR-520h	hsa-miR-766-3p	hsa-miR-629-5p	hsa-miR-1296-5p	hsa-miR-519c-3p	hsa-miR-144-3p	hsa-miR-98-5p	hsa-miR-657	hsa-miR-92b-3p	hsa-miR-32-5p	hsa-miR-124-3p	hsa-miR-106b-5p	hsa-miR-1303	hsa-miR-744-5p	hsa-miR-372-3p	hsa-miR-503-5p	hsa-miR-18a-3p	hsa-miR-302c-3p	hsa-miR-520a-3p	hsa-miR-130b-5p	hsa-miR-25-3p	hsa-miR-30a-5p	hsa-miR-1285-3p
hsa05200_Pathways_in_cancer	Pathways	hsa-miR-125b-5p	hsa-miR-513a-3p	hsa-miR-559	hsa-miR-3934-5p	hsa-miR-210-3p	hsa-miR-150-5p	hsa-miR-199a-3p	hsa-miR-19b-1-5p	hsa-miR-675-5p	hsa-miR-941	hsa-miR-193a-5p	hsa-let-7a-5p	hsa-miR-96-5p	hsa-miR-141-3p	hsa-miR-218-5p	hsa-miR-877-3p	hsa-miR-942-5p	hsa-miR-143-3p	hsa-miR-214-3p	hsa-miR-149-3p	hsa-miR-296-3p	hsa-miR-34c-5p	hsa-miR-22-3p	hsa-miR-331-5p	hsa-miR-26b-5p	hsa-miR-484	hsa-miR-204-5p	hsa-miR-885-5p	hsa-miR-501-5p	hsa-miR-497-5p	hsa-miR-196a-5p	hsa-miR-30b-5p	hsa-miR-500a-3p	hsa-miR-1229-3p	hsa-miR-92a-3p	hsa-miR-342-3p	hsa-miR-182-5p	hsa-miR-324-5p	hsa-miR-520b	hsa-miR-373-3p	hsa-miR-24-2-5p	hsa-miR-615-3p	hsa-miR-338-3p	hsa-miR-766-3p	hsa-miR-320b	hsa-miR-421	hsa-miR-423-5p	hsa-miR-190a-5p
P02742_Tetrahydrofolate_biosynthesis	Pathways	hsa-miR-18a-5p	hsa-miR-99a-5p	hsa-miR-222-3p	hsa-miR-124-3p	hsa-miR-193b-3p	hsa-miR-149-5p	hsa-miR-26b-5p	hsa-miR-484	hsa-miR-192-5p	hsa-miR-34a-5p	hsa-miR-1-3p	hsa-miR-215-5p	hsa-miR-194-5p	hsa-miR-335-5p	hsa-let-7b-5p	hsa-miR-18a-3p	hsa-miR-615-3p
WP368_Mitochondrial_LC_Fatty_Acid_Beta_Oxidation	Pathways	hsa-miR-197-3p	hsa-miR-1-3p	hsa-miR-215-5p	hsa-miR-31-3p	hsa-miR-30a-5p	hsa-miR-100-5p	hsa-miR-877-3p	hsa-miR-191-5p	hsa-miR-16-5p	hsa-miR-340-5p	hsa-miR-26b-5p	hsa-miR-484	hsa-miR-615-3p	hsa-miR-93-3p	hsa-miR-92a-3p	hsa-miR-34a-5p	hsa-miR-221-3p	hsa-miR-877-5p	hsa-miR-1226-3p	hsa-let-7b-5p	hsa-miR-98-5p	hsa-miR-769-5p	hsa-miR-128-3p	hsa-miR-378a-3p	hsa-miR-124-3p	hsa-miR-192-5p	hsa-miR-20a-5p	hsa-miR-155-5p	hsa-miR-151a-3p	hsa-miR-335-5p	hsa-miR-370-3p	hsa-miR-421	hsa-miR-375	hsa-miR-1260b
P02773_S_adenosylmethionine_biosynthesis	Pathways	hsa-miR-10a-5p	hsa-miR-193b-3p	hsa-miR-326	hsa-miR-106b-5p	hsa-miR-26b-5p	hsa-miR-484	hsa-miR-125a-5p	hsa-miR-186-5p	hsa-miR-30a-5p	hsa-miR-196b-5p	hsa-miR-335-5p	hsa-miR-324-3p
hsa04720_Long_term_potentiation	Pathways	hsa-miR-125b-5p	hsa-miR-150-5p	hsa-miR-24-2-5p	hsa-miR-1226-3p	hsa-miR-96-5p	hsa-miR-30a-3p	hsa-miR-143-3p	hsa-miR-214-3p	hsa-miR-296-3p	hsa-miR-22-3p	hsa-miR-26b-5p	hsa-miR-484	hsa-miR-615-3p	hsa-miR-497-5p	hsa-miR-92a-3p	hsa-miR-342-3p	hsa-miR-182-5p	hsa-miR-324-5p	hsa-miR-532-3p	hsa-miR-219a-5p	hsa-miR-766-3p	hsa-miR-423-5p	hsa-miR-181d-5p	hsa-miR-199a-3p	hsa-miR-98-5p	hsa-miR-92b-3p	hsa-miR-32-5p	hsa-miR-124-3p	hsa-miR-181c-5p	hsa-miR-744-5p	hsa-miR-101-3p	hsa-miR-374a-5p	hsa-miR-503-5p	hsa-miR-200c-3p	hsa-miR-18a-3p	hsa-miR-518b	hsa-miR-130b-5p	hsa-miR-877-3p	hsa-miR-30a-5p	hsa-miR-15b-5p	hsa-miR-7-5p	hsa-miR-26a-5p	hsa-miR-429	hsa-miR-622	hsa-miR-324-3p	hsa-miR-93-5p	hsa-miR-29a-3p	hsa-miR-148b-3p
P04378_Beta2_adrenergic_receptor_signaling_pathway	Pathways	hsa-miR-197-3p	hsa-miR-1-3p	hsa-miR-130b-3p	hsa-miR-30a-5p	hsa-miR-196b-5p	hsa-let-7c-5p	hsa-miR-25-3p	hsa-let-7e-5p	hsa-miR-148a-3p	hsa-miR-590-3p	hsa-miR-99a-5p	hsa-miR-423-5p	hsa-miR-7-5p	hsa-miR-365a-3p	hsa-miR-22-3p	hsa-miR-1260b	hsa-miR-193b-3p	hsa-miR-16-5p	hsa-miR-26b-5p	hsa-miR-484	hsa-miR-331-3p	hsa-miR-505-3p	hsa-miR-155-5p	hsa-miR-92a-3p	hsa-miR-93-5p	hsa-miR-324-5p	hsa-miR-21-5p	hsa-miR-29c-3p	hsa-miR-10a-5p	hsa-miR-19b-3p	hsa-miR-186-5p	hsa-miR-128-3p	hsa-miR-34a-5p	hsa-miR-17-5p	hsa-let-7b-5p	hsa-miR-769-3p	hsa-miR-98-5p	hsa-miR-133a-3p	hsa-miR-92b-3p	hsa-miR-124-3p	hsa-miR-589-3p	hsa-miR-27b-3p	hsa-miR-27a-3p	hsa-miR-744-5p	hsa-miR-101-3p	hsa-miR-100-5p	hsa-miR-23a-3p	hsa-miR-335-5p
hsa04710_Circadian_rhythm___mammal	Pathways	hsa-miR-149-5p	hsa-miR-130b-3p	hsa-miR-141-3p	hsa-miR-30c-5p	hsa-miR-33a-5p	hsa-miR-590-3p	hsa-miR-340-5p	hsa-miR-24-3p	hsa-miR-26b-5p	hsa-miR-484	hsa-miR-454-3p	hsa-miR-142-3p	hsa-miR-93-5p	hsa-miR-182-5p	hsa-miR-324-5p	hsa-miR-21-5p	hsa-miR-494-3p	hsa-miR-532-3p	hsa-miR-186-5p	hsa-miR-17-5p	hsa-let-7b-5p	hsa-miR-941	hsa-miR-106b-5p	hsa-miR-335-5p
P00009_Axon_guidance_mediated_by_netrin	Pathways	hsa-miR-9-5p	hsa-miR-376a-3p	hsa-miR-92b-3p	hsa-miR-346	hsa-miR-1-3p	hsa-miR-30a-5p	hsa-miR-100-5p	hsa-miR-330-3p	hsa-miR-10b-5p	hsa-miR-184	hsa-miR-216a-5p	hsa-miR-30c-5p	hsa-miR-137	hsa-miR-15b-5p	hsa-miR-7-5p	hsa-miR-185-5p	hsa-miR-195-5p	hsa-miR-330-5p	hsa-miR-193b-3p	hsa-miR-1296-5p	hsa-miR-26b-5p	hsa-miR-484	hsa-miR-374b-5p	hsa-miR-615-3p	hsa-miR-331-3p	hsa-miR-93-3p	hsa-miR-142-3p	hsa-miR-92a-3p	hsa-miR-324-3p	hsa-miR-122-5p	hsa-miR-608	hsa-miR-29a-3p	hsa-miR-1914-3p	hsa-miR-296-3p	hsa-miR-21-5p	hsa-miR-29c-3p	hsa-miR-93-5p	hsa-miR-148b-3p	hsa-miR-3615	hsa-miR-22-3p	hsa-miR-34a-5p	hsa-miR-194-5p	hsa-miR-133a-3p	hsa-miR-652-3p	hsa-miR-17-5p	hsa-let-7a-5p	hsa-let-7b-5p	hsa-miR-361-3p
WP395_IL_4_signaling_pathway	Pathways	hsa-miR-125b-5p	hsa-miR-210-3p	hsa-miR-150-5p	hsa-miR-193a-5p	hsa-let-7a-5p	hsa-miR-96-5p	hsa-miR-218-5p	hsa-miR-30a-3p	hsa-miR-33a-5p	hsa-miR-143-3p	hsa-miR-149-3p	hsa-miR-296-3p	hsa-miR-373-3p	hsa-miR-26b-5p	hsa-miR-484	hsa-miR-615-3p	hsa-miR-1229-3p	hsa-miR-92a-3p	hsa-miR-182-5p	hsa-miR-324-5p	hsa-miR-320b	hsa-miR-766-3p	hsa-miR-423-5p	hsa-miR-181d-5p	hsa-miR-199a-3p	hsa-miR-98-5p	hsa-let-7i-5p	hsa-miR-92b-3p	hsa-miR-124-3p	hsa-miR-106b-5p	hsa-miR-744-5p	hsa-miR-101-3p	hsa-miR-151a-3p	hsa-miR-374a-5p	hsa-miR-200c-3p	hsa-miR-302c-3p	hsa-miR-130b-5p	hsa-miR-30c-5p	hsa-miR-30a-5p	hsa-miR-148a-3p	hsa-miR-15b-5p	hsa-miR-7-5p	hsa-miR-146b-5p	hsa-miR-15a-5p	hsa-miR-429	hsa-miR-421	hsa-miR-324-3p	hsa-miR-93-5p
P05916_Opioid_prodynorphin_pathway	Pathways	hsa-let-7b-5p	hsa-miR-98-5p	hsa-miR-335-5p	hsa-miR-34a-5p	hsa-miR-124-3p
hsa04010_MAPK_signaling_pathway	Pathways	hsa-miR-125b-5p	hsa-miR-210-3p	hsa-miR-150-5p	hsa-miR-199a-3p	hsa-miR-125a-5p	hsa-miR-130b-3p	hsa-miR-96-5p	hsa-miR-141-3p	hsa-miR-218-5p	hsa-miR-877-3p	hsa-miR-33a-5p	hsa-miR-143-3p	hsa-miR-214-3p	hsa-miR-149-3p	hsa-miR-296-3p	hsa-miR-34c-5p	hsa-miR-22-3p	hsa-miR-26b-5p	hsa-miR-484	hsa-miR-615-3p	hsa-miR-497-5p	hsa-miR-196a-5p	hsa-miR-1180-3p	hsa-miR-92a-3p	hsa-miR-342-3p	hsa-miR-182-5p	hsa-miR-324-5p	hsa-miR-19a-3p	hsa-miR-186-3p	hsa-miR-320b	hsa-miR-19b-1-5p	hsa-miR-532-3p	hsa-miR-766-3p	hsa-miR-423-5p	hsa-miR-181d-5p	hsa-miR-324-3p	hsa-miR-30d-5p	hsa-miR-500a-3p	hsa-miR-98-5p	hsa-miR-92b-3p	hsa-miR-32-5p	hsa-miR-124-3p	hsa-miR-106b-5p	hsa-miR-129-1-3p	hsa-miR-744-5p	hsa-miR-101-3p	hsa-miR-151a-3p	hsa-miR-374a-5p
P00020_FAS_signaling_pathway	Pathways	hsa-miR-125b-5p	hsa-miR-19b-1-5p	hsa-miR-877-3p	hsa-miR-33a-5p	hsa-miR-143-3p	hsa-miR-214-3p	hsa-miR-149-3p	hsa-miR-296-3p	hsa-miR-373-3p	hsa-miR-26b-5p	hsa-miR-484	hsa-miR-615-3p	hsa-miR-196a-5p	hsa-miR-92a-3p	hsa-miR-342-3p	hsa-miR-874-3p	hsa-miR-140-3p	hsa-miR-423-5p	hsa-miR-199a-3p	hsa-miR-30d-5p	hsa-miR-98-5p	hsa-miR-124-3p	hsa-miR-106b-5p	hsa-miR-744-5p	hsa-miR-101-3p	hsa-miR-18a-3p	hsa-miR-125a-5p	hsa-miR-302c-3p	hsa-miR-30a-5p	hsa-miR-15b-5p	hsa-miR-7-5p	hsa-miR-1260b	hsa-miR-26a-5p	hsa-miR-15a-5p	hsa-miR-421	hsa-miR-1296-5p	hsa-miR-93-5p	hsa-miR-18a-5p	hsa-miR-221-3p	hsa-miR-146a-5p	hsa-miR-133a-3p	hsa-miR-423-3p	hsa-miR-138-5p	hsa-miR-512-3p	hsa-miR-335-5p	hsa-miR-320a	hsa-miR-222-3p	hsa-miR-27b-3p
WP1544_MicroRNAs_in_cardiomyocyte_hypertrophy	Pathways	hsa-miR-125b-5p	hsa-miR-210-3p	hsa-miR-19b-1-5p	hsa-miR-1226-3p	hsa-miR-218-5p	hsa-miR-877-3p	hsa-miR-33a-5p	hsa-miR-143-3p	hsa-miR-214-3p	hsa-miR-149-3p	hsa-miR-296-3p	hsa-miR-22-3p	hsa-miR-26b-5p	hsa-miR-484	hsa-miR-615-3p	hsa-miR-497-5p	hsa-miR-196a-5p	hsa-miR-92a-3p	hsa-miR-320b	hsa-miR-125a-5p	hsa-miR-532-3p	hsa-miR-766-3p	hsa-miR-423-5p	hsa-miR-199a-3p	hsa-miR-30d-5p	hsa-miR-144-3p	hsa-miR-98-5p	hsa-miR-320a	hsa-miR-92b-3p	hsa-miR-32-5p	hsa-miR-124-3p	hsa-miR-744-5p	hsa-miR-101-3p	hsa-miR-151a-3p	hsa-miR-503-5p	hsa-miR-200c-3p	hsa-miR-18a-3p	hsa-miR-302c-3p	hsa-miR-383-5p	hsa-miR-30a-5p	hsa-miR-15b-5p	hsa-miR-99a-5p	hsa-miR-7-5p	hsa-miR-26a-5p	hsa-miR-15a-5p	hsa-miR-296-5p	hsa-miR-421	hsa-miR-1296-5p
P00005_Angiogenesis	Pathways	hsa-miR-125b-5p	hsa-miR-210-3p	hsa-miR-150-5p	hsa-miR-125a-5p	hsa-miR-524-5p	hsa-miR-15a-5p	hsa-miR-130b-3p	hsa-miR-96-5p	hsa-miR-218-5p	hsa-miR-877-3p	hsa-miR-33a-5p	hsa-miR-143-3p	hsa-miR-214-3p	hsa-miR-149-3p	hsa-miR-296-3p	hsa-miR-34c-5p	hsa-miR-22-3p	hsa-miR-26b-5p	hsa-miR-484	hsa-miR-615-3p	hsa-miR-500a-3p	hsa-miR-196a-5p	hsa-miR-1229-3p	hsa-miR-92a-3p	hsa-miR-342-3p	hsa-miR-182-5p	hsa-miR-1914-3p	hsa-miR-320b	hsa-miR-19b-1-5p	hsa-miR-532-3p	hsa-miR-1292-5p	hsa-miR-766-3p	hsa-miR-505-5p	hsa-miR-423-5p	hsa-miR-181d-5p	hsa-miR-199a-3p	hsa-miR-519c-3p	hsa-miR-144-3p	hsa-miR-98-5p	hsa-let-7i-5p	hsa-miR-92b-3p	hsa-miR-32-5p	hsa-miR-124-3p	hsa-miR-106b-5p	hsa-miR-1303	hsa-miR-129-1-3p	hsa-miR-199b-5p	hsa-miR-744-5p
hsa00330_Arginine_and_proline_metabolism	Pathways	hsa-miR-9-5p	hsa-miR-26a-5p	hsa-miR-497-5p	hsa-miR-130b-5p	hsa-miR-149-5p	hsa-miR-1-3p	hsa-miR-215-5p	hsa-let-7a-5p	hsa-miR-30a-5p	hsa-miR-100-5p	hsa-miR-455-3p	hsa-miR-328-3p	hsa-miR-762	hsa-miR-25-3p	hsa-miR-16-5p	hsa-miR-20a-5p	hsa-miR-99a-5p	hsa-miR-423-5p	hsa-miR-7-5p	hsa-miR-185-5p	hsa-miR-22-3p	hsa-miR-744-5p	hsa-miR-193b-3p	hsa-let-7e-5p	hsa-miR-1260b	hsa-miR-484	hsa-miR-7-1-3p	hsa-miR-15a-5p	hsa-miR-615-3p	hsa-miR-93-3p	hsa-miR-196a-5p	hsa-miR-24-3p	hsa-miR-26b-5p	hsa-miR-92a-3p	hsa-miR-324-3p	hsa-miR-122-5p	hsa-miR-29a-3p	hsa-miR-324-5p	hsa-miR-296-3p	hsa-miR-346	hsa-miR-320b	hsa-miR-652-3p	hsa-miR-34a-5p	hsa-miR-937-3p	hsa-miR-186-5p	hsa-miR-935	hsa-miR-30d-5p	hsa-miR-17-5p
hsa00260_Glycine_serine_and_threonine_metabolism	Pathways	hsa-miR-132-3p	hsa-miR-125b-5p	hsa-miR-197-3p	hsa-miR-1229-3p	hsa-miR-149-5p	hsa-miR-1-3p	hsa-miR-215-5p	hsa-miR-16-5p	hsa-miR-99a-5p	hsa-miR-296-3p	hsa-miR-22-3p	hsa-miR-1260b	hsa-miR-193b-3p	hsa-miR-26b-5p	hsa-miR-484	hsa-miR-615-3p	hsa-miR-331-3p	hsa-miR-93-3p	hsa-miR-92a-3p	hsa-miR-342-3p	hsa-miR-122-5p	hsa-miR-324-5p	hsa-miR-652-3p	hsa-miR-186-5p	hsa-miR-504-5p	hsa-let-7a-5p	hsa-miR-940	hsa-miR-423-3p	hsa-miR-124-3p	hsa-miR-192-5p	hsa-miR-106b-3p	hsa-miR-155-5p	hsa-miR-335-5p	hsa-miR-107
hsa05340_Primary_immunodeficiency	Pathways	hsa-miR-125b-5p	hsa-miR-28-5p	hsa-miR-486-5p	hsa-miR-15a-5p	hsa-miR-215-5p	hsa-miR-196b-5p	hsa-miR-877-3p	hsa-miR-16-5p	hsa-miR-24-3p	hsa-miR-34c-5p	hsa-miR-26b-5p	hsa-miR-484	hsa-miR-129-2-3p	hsa-miR-196a-5p	hsa-miR-324-3p	hsa-miR-346	hsa-miR-199a-5p	hsa-miR-34a-5p	hsa-miR-186-5p	hsa-let-7d-5p	hsa-miR-146a-5p	hsa-miR-98-5p	hsa-miR-34b-3p	hsa-miR-192-5p	hsa-miR-335-5p	hsa-miR-224-5p
hsa05010_Alzheimers_disease	Pathways	hsa-miR-125b-5p	hsa-miR-199a-3p	hsa-miR-125a-5p	hsa-let-7a-5p	hsa-miR-96-5p	hsa-miR-877-3p	hsa-miR-18a-5p	hsa-miR-296-3p	hsa-miR-34c-5p	hsa-miR-3181	hsa-miR-26b-5p	hsa-miR-484	hsa-miR-615-3p	hsa-miR-196a-5p	hsa-miR-92a-3p	hsa-miR-182-5p	hsa-miR-324-5p	hsa-miR-19b-1-5p	hsa-miR-532-3p	hsa-miR-18b-5p	hsa-miR-629-5p	hsa-miR-1296-5p	hsa-miR-30d-5p	hsa-miR-98-5p	hsa-miR-92b-3p	hsa-miR-32-5p	hsa-miR-644a	hsa-miR-106b-5p	hsa-miR-124-3p	hsa-miR-744-5p	hsa-miR-101-3p	hsa-miR-503-5p	hsa-miR-18a-3p	hsa-miR-342-5p	hsa-miR-10b-5p	hsa-miR-545-3p	hsa-miR-130b-5p	hsa-miR-30c-5p	hsa-miR-30a-5p	hsa-miR-455-3p	hsa-miR-151a-5p	hsa-miR-148a-3p	hsa-miR-15b-5p	hsa-miR-99a-5p	hsa-miR-24-3p	hsa-miR-1260b	hsa-miR-26a-5p	hsa-miR-15a-5p
P00011_Blood_coagulation	Pathways	hsa-miR-132-3p	hsa-miR-9-5p	hsa-let-7d-5p	hsa-miR-520c-3p	hsa-miR-1-3p	hsa-miR-215-5p	hsa-miR-130b-3p	hsa-miR-328-3p	hsa-miR-877-3p	hsa-miR-16-5p	hsa-miR-99a-5p	hsa-miR-7-5p	hsa-miR-222-3p	hsa-miR-155-5p	hsa-miR-193b-3p	hsa-miR-130a-3p	hsa-miR-1260b	hsa-miR-484	hsa-miR-15a-5p	hsa-miR-204-5p	hsa-miR-3620-3p	hsa-miR-196a-5p	hsa-miR-92a-3p	hsa-miR-93-5p	hsa-miR-29a-3p	hsa-miR-409-3p	hsa-miR-21-5p	hsa-miR-29c-3p	hsa-miR-532-3p	hsa-miR-301a-3p	hsa-miR-145-5p	hsa-miR-128-3p	hsa-miR-17-5p	hsa-let-7a-5p	hsa-let-7b-5p	hsa-miR-144-3p	hsa-miR-98-5p	hsa-miR-29b-3p	hsa-miR-23b-3p	hsa-miR-26b-5p	hsa-miR-423-3p	hsa-miR-124-3p	hsa-miR-106b-5p	hsa-miR-192-5p	hsa-miR-20a-5p	hsa-miR-30c-5p	hsa-miR-500a-5p	hsa-miR-138-5p
P05915_Opioid_proenkephalin_pathway	Pathways	hsa-let-7b-5p	hsa-miR-98-5p	hsa-miR-34a-5p	hsa-miR-124-3p
hsa00061_Fatty_acid_biosynthesis	Pathways	hsa-miR-484	hsa-miR-197-3p	hsa-miR-2110	hsa-miR-130b-5p	hsa-miR-10b-5p	hsa-miR-877-3p	hsa-miR-942-5p	hsa-miR-24-3p	hsa-miR-222-3p	hsa-miR-193b-3p	hsa-miR-26a-5p	hsa-miR-148b-3p	hsa-miR-15a-5p	hsa-miR-615-3p	hsa-miR-331-3p	hsa-miR-1268a	hsa-miR-92a-3p	hsa-miR-324-3p	hsa-miR-93-5p	hsa-miR-326	hsa-miR-10a-5p	hsa-miR-186-5p	hsa-miR-17-5p	hsa-let-7b-5p	hsa-miR-98-5p	hsa-miR-92b-3p	hsa-miR-339-5p	hsa-miR-423-3p	hsa-miR-1303	hsa-miR-744-5p	hsa-miR-335-5p	hsa-miR-27b-3p
WP311_Synthesis_and_Degradation_of_Ketone_Bodies	Pathways	hsa-miR-23b-3p	hsa-miR-21-5p	hsa-miR-106b-5p	hsa-miR-1260b	hsa-miR-1-3p	hsa-miR-155-5p	hsa-miR-100-5p	hsa-miR-26b-5p
hsa00460_Cyanoamino_acid_metabolism	Pathways	hsa-miR-125b-5p	hsa-miR-346	hsa-miR-423-3p	hsa-miR-124-3p	hsa-miR-193b-3p	hsa-miR-92a-3p	hsa-miR-615-3p	hsa-miR-331-3p	hsa-miR-186-5p	hsa-miR-335-5p	hsa-let-7a-5p	hsa-miR-940
P04395_Vasopressin_synthesis	Pathways	hsa-miR-125b-5p	hsa-let-7d-5p	hsa-miR-125a-5p	hsa-miR-1-3p	hsa-miR-215-5p	hsa-miR-30a-5p	hsa-miR-96-5p	hsa-miR-30c-5p	hsa-miR-16-5p	hsa-let-7e-5p	hsa-miR-484	hsa-miR-1301-3p	hsa-miR-615-3p	hsa-miR-196a-5p	hsa-miR-93-5p	hsa-miR-21-5p	hsa-miR-17-5p	hsa-let-7b-5p	hsa-miR-124-3p	hsa-miR-192-5p	hsa-miR-155-5p	hsa-miR-335-5p
hsa00790_Folate_biosynthesis	Pathways	hsa-miR-18a-5p	hsa-miR-149-5p	hsa-miR-1-3p	hsa-miR-215-5p	hsa-miR-935	hsa-miR-15b-5p	hsa-miR-24-3p	hsa-miR-222-3p	hsa-miR-193b-3p	hsa-miR-26b-5p	hsa-miR-204-5p	hsa-miR-93-3p	hsa-miR-92a-3p	hsa-miR-148b-3p	hsa-miR-34a-5p	hsa-miR-145-5p	hsa-let-7b-5p	hsa-miR-124-3p	hsa-miR-192-5p	hsa-miR-99b-5p	hsa-miR-335-5p	hsa-miR-503-5p
hsa00740_Riboflavin_metabolism	Pathways	hsa-miR-15b-5p	hsa-miR-197-3p	hsa-miR-877-3p	hsa-miR-124-3p	hsa-miR-106b-5p	hsa-miR-484	hsa-miR-877-5p	hsa-miR-34a-5p	hsa-miR-1-3p	hsa-miR-186-5p	hsa-miR-30a-5p	hsa-miR-151a-3p	hsa-miR-98-5p	hsa-miR-320a	hsa-miR-25-3p	hsa-let-7b-5p	hsa-miR-181a-5p	hsa-miR-122-5p	hsa-miR-16-5p	hsa-miR-103a-3p
WP26_Signal_Transduction_of_S1P	Pathways	hsa-miR-125b-5p	hsa-miR-302c-3p	hsa-miR-197-3p	hsa-miR-708-5p	hsa-miR-302a-3p	hsa-miR-221-3p	hsa-miR-149-5p	hsa-miR-302d-3p	hsa-miR-1-3p	hsa-miR-215-5p	hsa-miR-30c-5p	hsa-miR-30a-5p	hsa-miR-100-5p	hsa-miR-184	hsa-let-7b-5p	hsa-miR-877-3p	hsa-miR-143-3p	hsa-miR-149-3p	hsa-miR-28-5p	hsa-miR-15b-5p	hsa-miR-99a-5p	hsa-miR-296-3p	hsa-miR-185-5p	hsa-miR-146b-5p	hsa-miR-193b-3p	hsa-miR-16-5p	hsa-miR-26b-5p	hsa-miR-484	hsa-miR-15a-5p	hsa-miR-935	hsa-miR-519d-3p	hsa-miR-302b-3p	hsa-miR-92a-3p	hsa-miR-1296-5p	hsa-miR-122-5p	hsa-miR-320b	hsa-miR-21-5p	hsa-miR-29c-3p	hsa-miR-148b-3p	hsa-miR-483-5p	hsa-miR-34a-5p	hsa-miR-766-3p	hsa-miR-186-5p	hsa-miR-423-5p	hsa-miR-30e-5p	hsa-miR-199a-3p	hsa-miR-30d-5p	hsa-miR-181a-5p
P04373_5HT1_type_receptor_mediated_signaling_pathway	Pathways	hsa-miR-148a-3p	hsa-miR-197-3p	hsa-miR-1-3p	hsa-miR-130b-3p	hsa-miR-30a-5p	hsa-miR-100-5p	hsa-miR-96-5p	hsa-miR-30d-5p	hsa-miR-877-3p	hsa-miR-16-5p	hsa-miR-769-3p	hsa-miR-590-3p	hsa-miR-7-5p	hsa-miR-365a-3p	hsa-miR-22-3p	hsa-miR-1260b	hsa-let-7e-5p	hsa-miR-26b-5p	hsa-miR-484	hsa-miR-935	hsa-miR-331-3p	hsa-miR-505-3p	hsa-miR-155-5p	hsa-miR-92a-3p	hsa-miR-93-5p	hsa-miR-324-5p	hsa-miR-21-5p	hsa-miR-29c-3p	hsa-miR-148b-3p	hsa-miR-19b-3p	hsa-miR-186-5p	hsa-miR-423-5p	hsa-miR-34a-5p	hsa-miR-30e-5p	hsa-miR-17-5p	hsa-let-7b-5p	hsa-miR-181a-5p	hsa-miR-98-5p	hsa-miR-128-3p	hsa-miR-92b-3p	hsa-miR-124-3p	hsa-miR-589-3p	hsa-miR-27b-3p	hsa-miR-27a-3p	hsa-miR-744-5p	hsa-miR-101-3p	hsa-miR-196b-5p	hsa-miR-23a-3p
hsa04012_ErbB_signaling_pathway	Pathways	hsa-miR-125b-5p	hsa-miR-559	hsa-miR-125a-5p	hsa-miR-15a-5p	hsa-miR-96-5p	hsa-miR-218-5p	hsa-miR-877-3p	hsa-miR-942-5p	hsa-miR-143-3p	hsa-miR-214-3p	hsa-miR-149-3p	hsa-miR-296-3p	hsa-miR-34c-5p	hsa-miR-22-3p	hsa-miR-324-3p	hsa-miR-26b-5p	hsa-miR-484	hsa-miR-615-3p	hsa-miR-500a-3p	hsa-miR-497-5p	hsa-miR-196a-5p	hsa-miR-1229-3p	hsa-miR-92a-3p	hsa-miR-342-3p	hsa-miR-182-5p	hsa-miR-1914-3p	hsa-miR-520b	hsa-miR-520h	hsa-miR-219a-5p	hsa-miR-766-3p	hsa-miR-421	hsa-miR-423-5p	hsa-miR-190a-5p	hsa-miR-181d-5p	hsa-miR-199a-3p	hsa-miR-519c-3p	hsa-miR-144-3p	hsa-miR-98-5p	hsa-miR-657	hsa-miR-92b-3p	hsa-miR-32-5p	hsa-miR-124-3p	hsa-miR-106b-5p	hsa-miR-129-1-3p	hsa-miR-199b-5p	hsa-miR-744-5p	hsa-miR-372-3p	hsa-miR-503-5p
P00031_Inflammation_mediated_by_chemokine_and_cytokine_signaling_pathway	Pathways	hsa-miR-125b-5p	hsa-miR-150-5p	hsa-miR-365a-3p	hsa-miR-125a-5p	hsa-let-7a-5p	hsa-miR-96-5p	hsa-miR-141-3p	hsa-miR-218-5p	hsa-miR-877-3p	hsa-miR-143-3p	hsa-miR-214-3p	hsa-miR-149-3p	hsa-miR-1914-3p	hsa-miR-671-5p	hsa-miR-324-3p	hsa-miR-26b-5p	hsa-miR-484	hsa-miR-615-3p	hsa-miR-144-3p	hsa-miR-196a-5p	hsa-miR-361-3p	hsa-miR-302a-3p	hsa-miR-92a-3p	hsa-miR-342-3p	hsa-miR-182-5p	hsa-miR-324-5p	hsa-miR-409-3p	hsa-miR-520b	hsa-miR-219a-5p	hsa-miR-766-3p	hsa-miR-423-5p	hsa-miR-181d-5p	hsa-miR-199a-3p	hsa-miR-519c-3p	hsa-miR-500a-3p	hsa-miR-98-5p	hsa-miR-92b-3p	hsa-miR-32-5p	hsa-miR-124-3p	hsa-miR-106b-5p	hsa-miR-644a	hsa-miR-181c-5p	hsa-miR-744-5p	hsa-miR-372-3p	hsa-miR-196b-5p	hsa-miR-200c-3p	hsa-miR-18a-3p	hsa-miR-302c-3p
WP304_Kit_receptor_signaling_pathway	Pathways	hsa-miR-125b-5p	hsa-miR-150-5p	hsa-miR-24-2-5p	hsa-miR-130b-3p	hsa-miR-96-5p	hsa-miR-218-5p	hsa-miR-30a-3p	hsa-miR-33a-5p	hsa-miR-143-3p	hsa-miR-214-3p	hsa-miR-149-3p	hsa-miR-296-3p	hsa-miR-34c-5p	hsa-miR-324-3p	hsa-miR-26b-5p	hsa-miR-204-5p	hsa-miR-497-5p	hsa-miR-1229-3p	hsa-miR-92a-3p	hsa-miR-182-5p	hsa-miR-1914-3p	hsa-miR-125a-5p	hsa-miR-766-3p	hsa-miR-181d-5p	hsa-miR-199a-3p	hsa-miR-19b-3p	hsa-miR-98-5p	hsa-let-7i-5p	hsa-miR-320a	hsa-miR-92b-3p	hsa-miR-877-3p	hsa-miR-124-3p	hsa-miR-129-1-3p	hsa-miR-744-5p	hsa-miR-101-3p	hsa-miR-374a-5p	hsa-miR-503-5p	hsa-miR-200c-3p	hsa-miR-302c-3p	hsa-miR-545-3p	hsa-miR-181c-5p	hsa-miR-130b-5p	hsa-miR-30c-5p	hsa-miR-877-5p	hsa-miR-148a-3p	hsa-miR-15b-5p	hsa-miR-99a-5p	hsa-miR-7-5p
hsa04650_Natural_killer_cell_mediated_cytotoxicity	Pathways	hsa-miR-125b-5p	hsa-miR-199a-3p	hsa-miR-24-2-5p	hsa-miR-96-5p	hsa-miR-141-3p	hsa-miR-218-5p	hsa-miR-877-3p	hsa-miR-143-3p	hsa-miR-296-3p	hsa-miR-1914-3p	hsa-miR-26b-5p	hsa-miR-484	hsa-miR-615-3p	hsa-miR-497-5p	hsa-miR-196a-5p	hsa-miR-98-5p	hsa-miR-92a-3p	hsa-miR-409-3p	hsa-miR-532-3p	hsa-miR-766-3p	hsa-miR-423-5p	hsa-miR-181d-5p	hsa-miR-324-3p	hsa-miR-30d-5p	hsa-miR-361-3p	hsa-miR-92b-3p	hsa-miR-124-3p	hsa-miR-106b-5p	hsa-miR-181c-5p	hsa-miR-744-5p	hsa-miR-101-3p	hsa-miR-200c-3p	hsa-miR-18a-3p	hsa-miR-130b-5p	hsa-miR-1256	hsa-miR-30a-3p	hsa-miR-30a-5p	hsa-miR-148a-3p	hsa-miR-15b-5p	hsa-miR-7-5p	hsa-miR-26a-5p	hsa-miR-15a-5p	hsa-miR-429	hsa-miR-622	hsa-miR-1296-5p	hsa-miR-93-5p	hsa-miR-29a-3p	hsa-miR-34c-5p
hsa00230_Purine_metabolism	Pathways	hsa-miR-125b-5p	hsa-miR-125a-5p	hsa-miR-130b-3p	hsa-miR-96-5p	hsa-miR-877-3p	hsa-miR-143-3p	hsa-miR-296-3p	hsa-miR-99a-3p	hsa-miR-26b-5p	hsa-miR-484	hsa-miR-615-3p	hsa-miR-196a-5p	hsa-miR-1229-3p	hsa-miR-92a-3p	hsa-miR-342-3p	hsa-miR-182-5p	hsa-miR-324-5p	hsa-miR-766-3p	hsa-miR-423-5p	hsa-miR-324-3p	hsa-miR-30d-5p	hsa-miR-98-5p	hsa-let-7i-5p	hsa-miR-124-3p	hsa-miR-744-5p	hsa-miR-365a-5p	hsa-miR-125a-3p	hsa-miR-193a-3p	hsa-miR-328-3p	hsa-miR-450b-5p	hsa-miR-130b-5p	hsa-miR-376a-5p	hsa-miR-625-5p	hsa-miR-877-5p	hsa-miR-455-3p	hsa-miR-15b-5p	hsa-miR-99a-5p	hsa-miR-7-5p	hsa-miR-1260b	hsa-miR-26a-5p	hsa-miR-15a-5p	hsa-miR-1268a	hsa-miR-421	hsa-miR-1296-5p	hsa-miR-93-5p	hsa-miR-29a-3p	hsa-miR-326	hsa-miR-652-3p
P00002_Alpha_adrenergic_receptor_signaling_pathway	Pathways	hsa-miR-9-5p	hsa-miR-197-3p	hsa-miR-24-2-5p	hsa-miR-1-3p	hsa-miR-215-5p	hsa-miR-30a-5p	hsa-miR-96-5p	hsa-miR-10b-5p	hsa-miR-30c-5p	hsa-miR-31-5p	hsa-miR-340-5p	hsa-miR-193b-3p	hsa-miR-26b-5p	hsa-miR-484	hsa-miR-615-3p	hsa-miR-205-5p	hsa-miR-505-3p	hsa-miR-92a-3p	hsa-miR-342-3p	hsa-miR-21-5p	hsa-miR-34a-5p	hsa-miR-423-5p	hsa-miR-19b-3p	hsa-let-7b-5p	hsa-miR-98-5p	hsa-miR-128-3p	hsa-miR-17-3p	hsa-miR-32-5p	hsa-miR-124-3p	hsa-miR-192-5p	hsa-miR-155-5p	hsa-miR-335-5p	hsa-miR-424-5p	hsa-miR-375
WP236_Adipogenesis	Pathways	hsa-miR-125b-5p	hsa-miR-2110	hsa-miR-150-5p	hsa-miR-125a-5p	hsa-miR-193a-5p	hsa-miR-130b-3p	hsa-miR-96-5p	hsa-miR-218-5p	hsa-miR-877-3p	hsa-miR-942-5p	hsa-miR-143-3p	hsa-miR-214-3p	hsa-miR-149-3p	hsa-miR-296-3p	hsa-miR-22-3p	hsa-miR-26b-5p	hsa-miR-484	hsa-miR-615-3p	hsa-miR-196a-5p	hsa-miR-302a-3p	hsa-miR-92a-3p	hsa-miR-182-5p	hsa-miR-324-5p	hsa-miR-520b	hsa-miR-520h	hsa-miR-532-3p	hsa-miR-421	hsa-miR-423-5p	hsa-miR-1296-5p	hsa-miR-519c-3p	hsa-miR-98-5p	hsa-let-7i-5p	hsa-miR-657	hsa-miR-92b-3p	hsa-miR-32-5p	hsa-miR-124-3p	hsa-miR-106b-5p	hsa-miR-25-3p	hsa-miR-199b-5p	hsa-miR-744-5p	hsa-miR-372-3p	hsa-miR-374a-5p	hsa-miR-503-5p	hsa-miR-18a-3p	hsa-miR-328-3p	hsa-miR-520a-3p	hsa-miR-130b-5p	hsa-miR-625-5p
hsa00020_Citrate_cycle_TCA_cycle	Pathways	hsa-miR-125b-5p	hsa-miR-28-5p	hsa-miR-1229-3p	hsa-miR-130b-5p	hsa-miR-149-5p	hsa-miR-21-5p	hsa-miR-1-3p	hsa-miR-1226-3p	hsa-miR-30a-5p	hsa-miR-335-5p	hsa-miR-10b-5p	hsa-miR-877-3p	hsa-miR-191-5p	hsa-miR-16-5p	hsa-miR-103a-2-5p	hsa-miR-15b-5p	hsa-miR-99a-5p	hsa-miR-24-3p	hsa-miR-222-3p	hsa-miR-22-3p	hsa-miR-193b-3p	hsa-miR-1260b	hsa-miR-484	hsa-miR-1301-3p	hsa-miR-615-3p	hsa-miR-93-3p	hsa-miR-17-5p	hsa-miR-92a-3p	hsa-miR-324-3p	hsa-miR-122-5p	hsa-miR-324-5p	hsa-miR-10a-3p	hsa-miR-326	hsa-miR-320a	hsa-miR-125a-5p	hsa-miR-361-5p	hsa-miR-34a-5p	hsa-miR-186-5p	hsa-miR-92b-5p	hsa-miR-342-3p	hsa-let-7a-5p	hsa-let-7b-5p	hsa-miR-769-3p	hsa-miR-98-5p	hsa-miR-423-3p	hsa-miR-339-5p	hsa-miR-26b-5p	hsa-miR-92b-3p
hsa00270_Cysteine_and_methionine_metabolism	Pathways	hsa-miR-484	hsa-miR-1-3p	hsa-miR-197-3p	hsa-miR-1229-3p	hsa-miR-152-3p	hsa-miR-186-3p	hsa-miR-149-5p	hsa-miR-744-5p	hsa-miR-106b-5p	hsa-miR-215-5p	hsa-miR-30a-5p	hsa-miR-100-5p	hsa-miR-7-1-3p	hsa-let-7c-5p	hsa-miR-33a-5p	hsa-miR-877-3p	hsa-miR-369-5p	hsa-miR-143-3p	hsa-miR-148a-3p	hsa-miR-455-3p	hsa-miR-10a-5p	hsa-miR-423-5p	hsa-miR-7-5p	hsa-miR-185-5p	hsa-miR-320c	hsa-miR-155-5p	hsa-miR-193b-3p	hsa-miR-16-5p	hsa-miR-26b-5p	hsa-miR-26a-5p	hsa-miR-615-3p	hsa-miR-331-3p	hsa-miR-191-5p	hsa-miR-93-3p	hsa-miR-196a-5p	hsa-miR-30b-5p	hsa-miR-92a-3p	hsa-miR-324-3p	hsa-miR-93-5p	hsa-miR-29a-3p	hsa-miR-324-5p	hsa-miR-21-5p	hsa-miR-29c-3p	hsa-miR-652-3p	hsa-miR-148b-3p	hsa-miR-125a-5p	hsa-miR-34a-5p	hsa-miR-140-5p
P00016_Cytoskeletal_regulation_by_Rho_GTPase	Pathways	hsa-miR-132-3p	hsa-miR-145-5p	hsa-miR-125a-5p	hsa-miR-941	hsa-miR-130b-3p	hsa-miR-218-5p	hsa-miR-877-3p	hsa-miR-373-3p	hsa-miR-26b-5p	hsa-miR-484	hsa-miR-615-3p	hsa-miR-196a-5p	hsa-miR-1229-3p	hsa-miR-92a-3p	hsa-miR-342-3p	hsa-miR-182-5p	hsa-miR-324-5p	hsa-miR-320b	hsa-miR-1292-5p	hsa-miR-766-3p	hsa-miR-423-5p	hsa-miR-324-3p	hsa-miR-500a-3p	hsa-miR-98-5p	hsa-miR-92b-3p	hsa-miR-124-3p	hsa-miR-106b-5p	hsa-miR-644a	hsa-miR-744-5p	hsa-miR-101-3p	hsa-miR-92a-1-5p	hsa-miR-200c-3p	hsa-miR-18a-3p	hsa-miR-328-3p	hsa-miR-25-3p	hsa-miR-877-5p	hsa-miR-455-3p	hsa-miR-326	hsa-miR-7-5p	hsa-miR-1227-3p	hsa-miR-26a-5p	hsa-miR-372-3p	hsa-miR-421	hsa-miR-1296-5p	hsa-miR-93-5p	hsa-miR-29a-3p	hsa-miR-137	hsa-miR-1307-3p
WP524_G13_Signaling_Pathway	Pathways	hsa-miR-877-3p	hsa-miR-296-3p	hsa-miR-373-3p	hsa-miR-26b-5p	hsa-miR-484	hsa-miR-615-3p	hsa-miR-92a-3p	hsa-miR-182-5p	hsa-miR-324-5p	hsa-miR-766-3p	hsa-miR-324-3p	hsa-miR-98-5p	hsa-miR-92b-3p	hsa-miR-32-5p	hsa-miR-124-3p	hsa-miR-106b-5p	hsa-miR-101-3p	hsa-miR-200c-3p	hsa-miR-18a-3p	hsa-miR-10b-5p	hsa-miR-30a-5p	hsa-miR-148a-3p	hsa-miR-15b-5p	hsa-miR-7-5p	hsa-miR-26a-5p	hsa-miR-1296-5p	hsa-miR-93-5p	hsa-miR-29a-3p	hsa-miR-137	hsa-miR-652-3p	hsa-miR-148b-3p	hsa-miR-221-3p	hsa-miR-194-5p	hsa-miR-146a-5p	hsa-miR-584-5p	hsa-miR-941	hsa-miR-23b-3p	hsa-miR-133a-3p	hsa-miR-138-5p	hsa-miR-320c	hsa-miR-320b	hsa-miR-320a	hsa-miR-222-3p	hsa-miR-224-5p	hsa-miR-27b-3p	hsa-miR-18a-5p	hsa-miR-99b-3p	hsa-miR-330-3p
hsa03040_Spliceosome	Pathways	hsa-miR-125b-5p	hsa-miR-10a-3p	hsa-miR-210-3p	hsa-miR-125a-5p	hsa-miR-130b-3p	hsa-miR-96-5p	hsa-miR-218-5p	hsa-miR-877-3p	hsa-miR-30a-3p	hsa-miR-296-3p	hsa-miR-34c-5p	hsa-miR-22-3p	hsa-miR-26b-5p	hsa-miR-484	hsa-miR-615-3p	hsa-miR-196a-5p	hsa-miR-1229-3p	hsa-miR-92a-3p	hsa-miR-342-3p	hsa-miR-182-5p	hsa-miR-324-5p	hsa-miR-450a-5p	hsa-miR-532-3p	hsa-miR-766-3p	hsa-miR-421	hsa-miR-423-5p	hsa-miR-324-3p	hsa-miR-30d-5p	hsa-miR-98-5p	hsa-miR-7-1-3p	hsa-miR-92b-3p	hsa-miR-32-5p	hsa-miR-124-3p	hsa-miR-106b-5p	hsa-miR-744-5p	hsa-miR-101-3p	hsa-miR-503-5p	hsa-miR-18a-3p	hsa-miR-193a-3p	hsa-miR-328-3p	hsa-miR-130b-5p	hsa-miR-542-5p	hsa-miR-25-3p	hsa-miR-30a-5p	hsa-miR-455-3p	hsa-miR-151a-5p	hsa-miR-4326	hsa-miR-15b-5p
P05913_Enkephalin_release	Pathways	hsa-miR-197-3p	hsa-miR-375	hsa-miR-1260b	hsa-miR-155-5p	hsa-let-7b-5p	hsa-miR-769-3p	hsa-miR-16-5p	hsa-miR-103a-3p
P05912_Dopamine_receptor_mediated_signaling_pathway	Pathways	hsa-miR-222-3p	hsa-miR-22-3p	hsa-miR-124-3p	hsa-miR-10a-5p	hsa-miR-1229-3p	hsa-miR-26b-5p	hsa-miR-98-5p	hsa-miR-34a-5p	hsa-miR-1-3p	hsa-miR-155-5p	hsa-miR-335-5p	hsa-miR-17-5p	hsa-miR-375	hsa-let-7b-5p	hsa-miR-769-3p	hsa-miR-331-3p	hsa-miR-16-5p	hsa-miR-1260b	hsa-miR-103a-3p	hsa-miR-197-3p
WP314_FAS_pathway_and_Stress_induction_of_HSP_regulation	Pathways	hsa-miR-125b-5p	hsa-miR-19b-1-5p	hsa-miR-675-5p	hsa-miR-130b-3p	hsa-miR-96-5p	hsa-miR-877-3p	hsa-miR-33a-5p	hsa-miR-143-3p	hsa-miR-214-3p	hsa-miR-18a-5p	hsa-miR-296-3p	hsa-miR-34c-5p	hsa-miR-373-3p	hsa-miR-26b-5p	hsa-miR-484	hsa-miR-204-5p	hsa-miR-196a-5p	hsa-miR-92a-3p	hsa-miR-342-3p	hsa-miR-182-5p	hsa-miR-324-5p	hsa-miR-874-3p	hsa-miR-24-2-5p	hsa-miR-423-5p	hsa-miR-181d-5p	hsa-miR-30d-5p	hsa-miR-500a-3p	hsa-miR-98-5p	hsa-miR-124-3p	hsa-miR-106b-5p	hsa-miR-181c-5p	hsa-miR-101-3p	hsa-miR-200c-3p	hsa-miR-18a-3p	hsa-miR-125a-5p	hsa-miR-30a-5p	hsa-miR-148a-3p	hsa-miR-15b-5p	hsa-miR-99a-5p	hsa-miR-7-5p	hsa-miR-26a-5p	hsa-miR-15a-5p	hsa-miR-429	hsa-miR-296-5p	hsa-miR-421	hsa-miR-93-5p	hsa-miR-29a-3p	hsa-miR-221-3p
hsa03450_Non_homologous_end_joining	Pathways	hsa-miR-132-3p	hsa-miR-671-5p	hsa-miR-1229-3p	hsa-miR-1-3p	hsa-miR-215-5p	hsa-miR-30a-5p	hsa-miR-100-5p	hsa-miR-877-3p	hsa-miR-16-5p	hsa-miR-24-3p	hsa-miR-373-3p	hsa-miR-193b-3p	hsa-miR-26b-5p	hsa-miR-484	hsa-miR-615-3p	hsa-miR-331-3p	hsa-miR-505-3p	hsa-miR-210-3p	hsa-miR-324-3p	hsa-miR-326	hsa-miR-34a-5p	hsa-miR-766-3p	hsa-miR-221-3p	hsa-miR-7-5p	hsa-let-7b-5p	hsa-miR-181b-5p	hsa-miR-941	hsa-miR-128-3p	hsa-miR-423-3p	hsa-miR-183-5p	hsa-miR-192-5p	hsa-miR-335-5p	hsa-miR-101-5p	hsa-miR-375
hsa00240_Pyrimidine_metabolism	Pathways	hsa-miR-125b-5p	hsa-miR-125a-5p	hsa-miR-1226-3p	hsa-miR-877-3p	hsa-miR-99a-3p	hsa-miR-26b-5p	hsa-miR-484	hsa-miR-615-3p	hsa-miR-196a-5p	hsa-miR-1180-3p	hsa-miR-92a-3p	hsa-miR-342-3p	hsa-miR-324-5p	hsa-miR-505-5p	hsa-miR-423-5p	hsa-miR-324-3p	hsa-miR-30d-5p	hsa-miR-98-5p	hsa-let-7i-5p	hsa-miR-92b-3p	hsa-miR-124-3p	hsa-miR-106b-5p	hsa-miR-744-5p	hsa-miR-101-3p	hsa-miR-18a-3p	hsa-miR-328-3p	hsa-miR-192-5p	hsa-miR-130b-5p	hsa-miR-365a-5p	hsa-miR-455-3p	hsa-miR-99a-5p	hsa-miR-7-5p	hsa-miR-1260b	hsa-miR-26a-5p	hsa-miR-15a-5p	hsa-miR-1268a	hsa-miR-421	hsa-miR-1296-5p	hsa-miR-93-5p	hsa-miR-29a-3p	hsa-miR-326	hsa-miR-652-3p	hsa-miR-148b-3p	hsa-miR-221-3p	hsa-miR-194-5p	hsa-miR-365a-3p	hsa-miR-133a-3p	hsa-miR-423-3p
hsa00030_Pentose_phosphate_pathway	Pathways	hsa-miR-26a-5p	hsa-miR-671-5p	hsa-miR-520a-3p	hsa-miR-1180-3p	hsa-miR-149-5p	hsa-miR-376a-5p	hsa-miR-1-3p	hsa-miR-215-5p	hsa-miR-30a-5p	hsa-miR-196b-5p	hsa-miR-455-3p	hsa-miR-935	hsa-miR-30c-5p	hsa-miR-191-5p	hsa-let-7e-5p	hsa-miR-15b-5p	hsa-miR-296-3p	hsa-miR-222-3p	hsa-miR-373-3p	hsa-miR-330-5p	hsa-miR-193b-3p	hsa-miR-324-3p	hsa-miR-1260b	hsa-miR-484	hsa-miR-1301-3p	hsa-miR-615-3p	hsa-miR-331-3p	hsa-miR-1229-3p	hsa-miR-92a-3p	hsa-miR-1296-5p	hsa-miR-122-5p	hsa-miR-324-5p	hsa-miR-346	hsa-miR-520b	hsa-miR-520e	hsa-miR-339-5p	hsa-miR-148b-3p	hsa-miR-142-3p	hsa-miR-34a-5p	hsa-miR-760	hsa-miR-30e-5p	hsa-miR-17-5p	hsa-miR-1226-3p	hsa-let-7b-5p	hsa-miR-181a-5p	hsa-miR-20a-3p	hsa-miR-423-3p	hsa-miR-378a-5p
WP400_p38_MAPK_Signaling_Pathway	Pathways	hsa-miR-125b-5p	hsa-miR-125a-5p	hsa-miR-96-5p	hsa-miR-143-3p	hsa-miR-34c-5p	hsa-miR-26b-5p	hsa-miR-484	hsa-miR-615-3p	hsa-miR-182-5p	hsa-miR-324-5p	hsa-miR-423-5p	hsa-miR-181d-5p	hsa-miR-98-5p	hsa-miR-92b-3p	hsa-miR-124-3p	hsa-miR-106b-5p	hsa-miR-744-5p	hsa-miR-101-3p	hsa-miR-200c-3p	hsa-miR-877-5p	hsa-miR-148a-3p	hsa-miR-15b-5p	hsa-miR-99a-5p	hsa-miR-24-3p	hsa-miR-26a-5p	hsa-miR-15a-5p	hsa-miR-429	hsa-miR-93-5p	hsa-miR-29a-3p	hsa-miR-137	hsa-miR-652-3p	hsa-miR-194-5p	hsa-miR-34a-5p	hsa-miR-146b-5p	hsa-miR-1226-5p	hsa-miR-29b-3p	hsa-miR-423-3p	hsa-miR-200a-3p	hsa-miR-449c-5p	hsa-miR-34b-5p	hsa-miR-320b	hsa-miR-320a	hsa-miR-222-3p	hsa-miR-224-5p	hsa-miR-203a-3p	hsa-let-7g-5p	hsa-miR-1229-3p	hsa-miR-330-3p
WP536_Calcium_Regulation_in_the_Cardiac_Cell	Pathways	hsa-miR-125b-5p	hsa-miR-1910-5p	hsa-miR-24-2-5p	hsa-let-7a-5p	hsa-miR-96-5p	hsa-miR-218-5p	hsa-miR-877-3p	hsa-miR-33a-5p	hsa-miR-214-3p	hsa-miR-296-3p	hsa-miR-22-3p	hsa-miR-331-5p	hsa-miR-26b-5p	hsa-miR-484	hsa-miR-615-3p	hsa-miR-92a-3p	hsa-miR-342-3p	hsa-miR-182-5p	hsa-miR-324-5p	hsa-miR-219a-5p	hsa-miR-421	hsa-miR-423-5p	hsa-miR-1296-5p	hsa-miR-30d-5p	hsa-miR-98-5p	hsa-miR-92b-3p	hsa-miR-32-5p	hsa-miR-124-3p	hsa-miR-744-5p	hsa-miR-101-3p	hsa-miR-18a-3p	hsa-miR-328-3p	hsa-miR-30a-3p	hsa-miR-877-5p	hsa-miR-425-5p	hsa-miR-455-3p	hsa-miR-30e-3p	hsa-miR-148a-3p	hsa-miR-15b-5p	hsa-miR-99a-5p	hsa-miR-7-5p	hsa-miR-340-3p	hsa-miR-1260b	hsa-miR-26a-5p	hsa-miR-505-5p	hsa-miR-324-3p	hsa-miR-93-5p	hsa-miR-326
WP237_Glucocorticoid_&_Mineralcorticoid_Metabolism	Pathways	hsa-miR-26b-5p	hsa-miR-335-5p
hsa00430_Taurine_and_hypotaurine_metabolism	Pathways	hsa-miR-99a-5p	hsa-miR-346	hsa-miR-128-3p	hsa-miR-29c-3p	hsa-miR-124-3p	hsa-miR-34a-5p	hsa-miR-331-3p	hsa-miR-101-3p	hsa-miR-7-5p	hsa-miR-335-5p	hsa-miR-122-5p
WP581_EPO_Receptor_Signaling	Pathways	hsa-miR-132-3p	hsa-miR-125b-5p	hsa-miR-302c-3p	hsa-miR-28-5p	hsa-miR-497-5p	hsa-miR-302a-3p	hsa-miR-152-3p	hsa-miR-19a-3p	hsa-miR-302d-3p	hsa-miR-20a-5p	hsa-miR-30a-5p	hsa-miR-100-5p	hsa-miR-141-3p	hsa-miR-135a-5p	hsa-miR-30c-5p	hsa-miR-33a-5p	hsa-miR-31-5p	hsa-miR-16-5p	hsa-miR-148a-3p	hsa-miR-149-3p	hsa-miR-15b-5p	hsa-miR-7-5p	hsa-miR-185-5p	hsa-miR-195-5p	hsa-miR-93-3p	hsa-miR-193b-3p	hsa-miR-143-3p	hsa-miR-26b-5p	hsa-miR-26a-5p	hsa-miR-122-5p	hsa-miR-374b-5p	hsa-miR-615-3p	hsa-miR-214-3p	hsa-miR-429	hsa-miR-217	hsa-miR-30b-5p	hsa-miR-302b-3p	hsa-miR-98-5p	hsa-miR-1229-3p	hsa-miR-92a-3p	hsa-miR-324-3p	hsa-miR-93-5p	hsa-miR-320b	hsa-miR-20b-5p	hsa-miR-21-5p	hsa-miR-424-5p	hsa-miR-200b-3p	hsa-miR-148b-3p
P02762_Pentose_phosphate_pathway	Pathways	hsa-miR-671-5p	hsa-miR-1229-3p	hsa-miR-149-5p	hsa-miR-1-3p	hsa-let-7e-5p	hsa-miR-15b-5p	hsa-miR-296-3p	hsa-miR-193b-3p	hsa-miR-760	hsa-miR-484	hsa-miR-935	hsa-miR-331-3p	hsa-miR-1180-3p	hsa-miR-92a-3p	hsa-miR-1296-5p	hsa-miR-346	hsa-miR-34a-5p	hsa-miR-92b-5p	hsa-miR-17-5p	hsa-let-7b-5p	hsa-miR-181a-5p	hsa-miR-20a-3p	hsa-miR-378a-5p	hsa-miR-339-5p
P02722_Acetate_utilization	Pathways	hsa-miR-25-3p	hsa-miR-125b-5p	hsa-miR-335-5p	hsa-miR-34a-5p	hsa-miR-191-5p
WP357_Fatty_Acid_Biosynthesis	Pathways	hsa-miR-125b-5p	hsa-miR-26a-5p	hsa-miR-197-3p	hsa-miR-2110	hsa-miR-1229-3p	hsa-miR-152-3p	hsa-miR-130b-5p	hsa-miR-149-5p	hsa-miR-1-3p	hsa-miR-215-5p	hsa-miR-30a-5p	hsa-miR-100-5p	hsa-miR-455-3p	hsa-miR-10b-5p	hsa-miR-942-5p	hsa-miR-877-3p	hsa-miR-191-5p	hsa-let-7e-5p	hsa-miR-181a-5p	hsa-miR-15b-5p	hsa-miR-340-5p	hsa-miR-24-3p	hsa-miR-222-3p	hsa-miR-1268a	hsa-miR-193b-3p	hsa-miR-16-5p	hsa-miR-26b-5p	hsa-miR-484	hsa-miR-15a-5p	hsa-miR-615-3p	hsa-miR-331-3p	hsa-miR-93-3p	hsa-miR-196a-5p	hsa-miR-10a-5p	hsa-miR-155-5p	hsa-miR-92a-3p	hsa-miR-324-3p	hsa-miR-93-5p	hsa-miR-335-5p	hsa-miR-10a-3p	hsa-miR-326	hsa-miR-23b-3p	hsa-miR-148b-3p	hsa-miR-125a-5p	hsa-miR-361-5p	hsa-miR-34a-5p	hsa-let-7f-1-3p	hsa-miR-186-5p
P05731_GABA_B_receptor_II_signaling	Pathways	hsa-miR-197-3p	hsa-miR-192-5p	hsa-miR-17-5p	hsa-miR-1-3p	hsa-miR-215-5p	hsa-miR-25-3p	hsa-miR-30a-5p	hsa-miR-100-5p	hsa-miR-96-5p	hsa-miR-877-3p	hsa-miR-16-5p	hsa-miR-769-3p	hsa-miR-590-3p	hsa-miR-99a-5p	hsa-miR-7-5p	hsa-miR-365a-3p	hsa-miR-22-3p	hsa-miR-155-5p	hsa-miR-193b-3p	hsa-let-7e-5p	hsa-miR-26b-5p	hsa-miR-484	hsa-miR-204-5p	hsa-miR-331-3p	hsa-miR-1296-5p	hsa-miR-93-5p	hsa-miR-182-5p	hsa-miR-324-5p	hsa-miR-21-5p	hsa-miR-1260b	hsa-miR-29c-3p	hsa-miR-10a-5p	hsa-miR-19b-3p	hsa-miR-186-5p	hsa-miR-423-5p	hsa-let-7d-5p	hsa-let-7b-5p	hsa-miR-181a-5p	hsa-miR-98-5p	hsa-miR-92b-3p	hsa-miR-423-3p	hsa-miR-124-3p	hsa-miR-33b-5p	hsa-miR-589-3p	hsa-miR-27b-3p	hsa-miR-744-5p	hsa-miR-101-3p	hsa-miR-196b-5p
hsa05212_Pancreatic_cancer	Pathways	hsa-miR-125b-5p	hsa-miR-559	hsa-miR-210-3p	hsa-miR-150-5p	hsa-miR-361-5p	hsa-miR-19b-1-5p	hsa-miR-675-5p	hsa-miR-130b-3p	hsa-miR-96-5p	hsa-miR-141-3p	hsa-miR-218-5p	hsa-miR-877-3p	hsa-miR-33a-5p	hsa-miR-143-3p	hsa-miR-214-3p	hsa-miR-149-3p	hsa-miR-296-3p	hsa-miR-34c-5p	hsa-miR-22-3p	hsa-miR-26b-5p	hsa-miR-484	hsa-miR-615-3p	hsa-miR-497-5p	hsa-miR-196a-5p	hsa-miR-92a-3p	hsa-miR-182-5p	hsa-miR-324-5p	hsa-miR-520b	hsa-miR-125a-5p	hsa-miR-338-3p	hsa-miR-766-3p	hsa-miR-520g-3p	hsa-miR-423-5p	hsa-miR-199a-3p	hsa-miR-30d-5p	hsa-miR-98-5p	hsa-miR-92b-3p	hsa-miR-32-5p	hsa-miR-124-3p	hsa-miR-106b-5p	hsa-miR-1303	hsa-miR-181c-5p	hsa-miR-199b-5p	hsa-miR-744-5p	hsa-miR-101-3p	hsa-miR-134-5p	hsa-miR-503-5p	hsa-miR-200c-3p
P00026_Heterotrimeric_G_protein_signaling_pathway_Gi_alpha_and_Gs_alpha_mediated_pathway	Pathways	hsa-miR-125b-5p	hsa-miR-150-5p	hsa-miR-96-5p	hsa-miR-877-3p	hsa-miR-296-3p	hsa-miR-22-3p	hsa-miR-99a-3p	hsa-miR-26b-5p	hsa-miR-484	hsa-miR-615-3p	hsa-miR-92a-3p	hsa-miR-182-5p	hsa-miR-324-5p	hsa-miR-423-5p	hsa-miR-181d-5p	hsa-miR-324-3p	hsa-miR-30d-5p	hsa-miR-98-5p	hsa-miR-92b-3p	hsa-miR-32-5p	hsa-miR-124-3p	hsa-miR-106b-5p	hsa-miR-744-5p	hsa-miR-101-3p	hsa-miR-374a-5p	hsa-miR-503-5p	hsa-miR-200c-3p	hsa-miR-518b	hsa-miR-130b-5p	hsa-miR-30a-3p	hsa-miR-877-5p	hsa-miR-4326	hsa-miR-99a-5p	hsa-miR-7-5p	hsa-miR-1260b	hsa-miR-26a-5p	hsa-miR-15a-5p	hsa-miR-429	hsa-miR-421	hsa-miR-1296-5p	hsa-miR-93-5p	hsa-miR-326	hsa-miR-652-3p	hsa-miR-148b-3p	hsa-miR-194-5p	hsa-miR-19b-3p	hsa-miR-146a-5p	hsa-miR-941
WP231_TNF_alpha_Signaling_Pathway	Pathways	hsa-miR-125b-5p	hsa-miR-210-3p	hsa-miR-19b-1-5p	hsa-miR-1226-3p	hsa-miR-218-5p	hsa-miR-877-3p	hsa-miR-33a-5p	hsa-miR-143-3p	hsa-miR-214-3p	hsa-miR-149-3p	hsa-miR-296-3p	hsa-miR-22-3p	hsa-miR-26b-5p	hsa-miR-484	hsa-miR-204-5p	hsa-miR-196a-5p	hsa-miR-361-3p	hsa-miR-1180-3p	hsa-miR-92a-3p	hsa-miR-342-3p	hsa-miR-324-5p	hsa-miR-874-3p	hsa-miR-339-5p	hsa-miR-125a-5p	hsa-miR-3943	hsa-miR-501-5p	hsa-miR-766-3p	hsa-miR-423-5p	hsa-miR-199a-3p	hsa-miR-30d-5p	hsa-miR-98-5p	hsa-miR-92b-3p	hsa-miR-124-3p	hsa-miR-106b-5p	hsa-miR-101-3p	hsa-miR-151a-3p	hsa-miR-92a-1-5p	hsa-miR-200c-3p	hsa-miR-125a-3p	hsa-miR-10b-5p	hsa-miR-302c-3p	hsa-miR-491-5p	hsa-miR-30c-5p	hsa-miR-30a-5p	hsa-miR-151a-5p	hsa-miR-15b-5p	hsa-miR-7-5p	hsa-miR-146b-5p
WP244_Alpha_6_Beta_4_signaling_pathway	Pathways	hsa-miR-125b-5p	hsa-miR-125a-5p	hsa-miR-218-5p	hsa-miR-33a-5p	hsa-miR-143-3p	hsa-miR-149-3p	hsa-miR-296-3p	hsa-miR-26b-5p	hsa-miR-484	hsa-miR-615-3p	hsa-miR-144-3p	hsa-miR-92a-3p	hsa-miR-24-2-5p	hsa-miR-766-3p	hsa-miR-181d-5p	hsa-miR-199a-3p	hsa-miR-500a-3p	hsa-miR-98-5p	hsa-miR-92b-3p	hsa-miR-32-5p	hsa-miR-124-3p	hsa-miR-199b-5p	hsa-miR-744-5p	hsa-miR-101-3p	hsa-miR-200c-3p	hsa-miR-193a-3p	hsa-miR-302c-3p	hsa-miR-130b-5p	hsa-miR-30a-5p	hsa-miR-148a-3p	hsa-miR-15b-5p	hsa-miR-99a-5p	hsa-miR-24-3p	hsa-miR-429	hsa-miR-93-5p	hsa-miR-29a-3p	hsa-miR-652-3p	hsa-miR-148b-3p	hsa-miR-483-5p	hsa-miR-221-3p	hsa-miR-194-5p	hsa-miR-769-5p	hsa-miR-23b-3p	hsa-miR-133a-3p	hsa-miR-423-3p	hsa-miR-200a-3p	hsa-miR-138-5p	hsa-miR-320c
hsa00310_Lysine_degradation	Pathways	hsa-miR-125b-5p	hsa-miR-125a-5p	hsa-miR-1226-3p	hsa-miR-877-3p	hsa-miR-296-3p	hsa-miR-760	hsa-miR-484	hsa-miR-615-3p	hsa-miR-92a-3p	hsa-miR-324-5p	hsa-miR-423-5p	hsa-miR-98-5p	hsa-miR-92b-3p	hsa-miR-32-5p	hsa-miR-124-3p	hsa-miR-106b-5p	hsa-miR-151a-3p	hsa-miR-503-5p	hsa-miR-18a-3p	hsa-miR-10b-5p	hsa-miR-130b-5p	hsa-miR-625-5p	hsa-miR-877-5p	hsa-miR-151a-5p	hsa-miR-15b-5p	hsa-miR-7-5p	hsa-miR-1260b	hsa-miR-26a-5p	hsa-miR-421	hsa-miR-324-3p	hsa-miR-93-5p	hsa-miR-29a-3p	hsa-miR-221-3p	hsa-miR-19b-3p	hsa-miR-23b-3p	hsa-miR-423-3p	hsa-miR-130b-3p	hsa-miR-320b	hsa-miR-320a	hsa-miR-502-5p	hsa-miR-27b-3p	hsa-miR-132-3p	hsa-miR-28-5p	hsa-miR-497-5p	hsa-miR-152-3p	hsa-miR-196b-5p	hsa-miR-328-3p	hsa-miR-25-3p
0_Folic_Acid_Network	Pathways	hsa-miR-149-5p	hsa-miR-1301-3p	hsa-miR-222-3p
hsa05211_Renal_cell_carcinoma	Pathways	hsa-miR-125b-5p	hsa-miR-150-5p	hsa-miR-199a-3p	hsa-miR-125a-5p	hsa-miR-130b-3p	hsa-miR-96-5p	hsa-miR-218-5p	hsa-miR-877-3p	hsa-miR-33a-5p	hsa-miR-143-3p	hsa-miR-149-3p	hsa-miR-296-3p	hsa-miR-34c-5p	hsa-miR-373-3p	hsa-miR-26b-5p	hsa-miR-484	hsa-miR-615-3p	hsa-miR-497-5p	hsa-miR-1229-3p	hsa-miR-92a-3p	hsa-miR-342-3p	hsa-miR-182-5p	hsa-miR-324-5p	hsa-miR-520h	hsa-miR-766-3p	hsa-miR-520g-3p	hsa-miR-423-5p	hsa-miR-181d-5p	hsa-miR-324-3p	hsa-miR-19b-3p	hsa-miR-519c-3p	hsa-miR-500a-3p	hsa-miR-98-5p	hsa-let-7i-5p	hsa-miR-92b-3p	hsa-miR-32-5p	hsa-miR-124-3p	hsa-miR-106b-5p	hsa-miR-1303	hsa-miR-129-1-3p	hsa-miR-199b-5p	hsa-miR-744-5p	hsa-miR-101-3p	hsa-miR-374a-5p	hsa-miR-503-5p	hsa-miR-200c-3p	hsa-miR-18a-3p	hsa-miR-10b-5p
hsa04742_Taste_transduction	Pathways	hsa-miR-1-3p	hsa-miR-196b-5p	hsa-miR-96-5p	hsa-miR-877-3p	hsa-miR-16-5p	hsa-miR-365a-3p	hsa-miR-22-3p	hsa-miR-744-5p	hsa-miR-26b-5p	hsa-miR-615-3p	hsa-miR-331-3p	hsa-miR-142-3p	hsa-miR-92a-3p	hsa-miR-324-3p	hsa-miR-93-5p	hsa-miR-182-5p	hsa-miR-320b	hsa-miR-19b-3p	hsa-miR-17-5p	hsa-miR-1226-3p	hsa-let-7b-5p	hsa-miR-23b-3p	hsa-miR-124-3p	hsa-miR-1227-3p	hsa-miR-589-3p	hsa-miR-155-5p	hsa-miR-101-3p	hsa-miR-335-5p	hsa-miR-320a	hsa-miR-18a-3p	hsa-miR-375	hsa-miR-106a-5p	hsa-miR-103a-3p
WP98_Prostaglandin_Synthesis_and_Regulation	Pathways	hsa-miR-132-3p	hsa-miR-203a-3p	hsa-miR-484	hsa-miR-99b-3p	hsa-miR-708-5p	hsa-miR-1908-5p	hsa-miR-149-5p	hsa-miR-1-3p	hsa-miR-30a-5p	hsa-miR-196b-5p	hsa-miR-877-3p	hsa-miR-137	hsa-let-7e-5p	hsa-miR-181a-5p	hsa-miR-99a-5p	hsa-miR-186-5p	hsa-miR-296-3p	hsa-miR-146b-5p	hsa-miR-3934-5p	hsa-miR-330-5p	hsa-miR-744-5p	hsa-miR-193b-3p	hsa-miR-16-5p	hsa-miR-26b-5p	hsa-miR-26a-5p	hsa-miR-1301-3p	hsa-miR-615-3p	hsa-miR-148b-3p	hsa-miR-196a-5p	hsa-miR-92a-3p	hsa-miR-324-5p	hsa-miR-21-5p	hsa-miR-550a-5p	hsa-miR-199a-5p	hsa-miR-652-3p	hsa-miR-10a-5p	hsa-miR-361-5p	hsa-miR-224-5p	hsa-miR-34a-5p	hsa-miR-766-3p	hsa-miR-449c-5p	hsa-miR-423-5p	hsa-miR-17-5p	hsa-let-7a-5p	hsa-let-7b-5p	hsa-miR-769-3p	hsa-miR-378a-5p	hsa-miR-23b-3p
P00038_JAK_STAT_signaling_pathway	Pathways	hsa-miR-125b-5p	hsa-miR-1229-3p	hsa-miR-141-3p	hsa-miR-30c-5p	hsa-let-7e-5p	hsa-miR-15b-5p	hsa-miR-24-3p	hsa-miR-222-3p	hsa-miR-195-5p	hsa-miR-16-5p	hsa-miR-26b-5p	hsa-miR-122-5p	hsa-miR-615-3p	hsa-miR-19a-3p	hsa-miR-93-3p	hsa-miR-30b-5p	hsa-miR-92a-3p	hsa-miR-324-3p	hsa-miR-93-5p	hsa-let-7i-5p	hsa-miR-21-5p	hsa-miR-10a-5p	hsa-miR-34a-5p	hsa-miR-145-5p	hsa-miR-337-3p	hsa-miR-17-5p	hsa-miR-19b-3p	hsa-miR-146a-5p	hsa-miR-20b-5p	hsa-miR-23b-3p	hsa-miR-128-3p	hsa-miR-200a-3p	hsa-miR-124-3p	hsa-miR-106b-5p	hsa-miR-135a-5p	hsa-miR-20a-5p	hsa-miR-155-5p	hsa-miR-335-5p	hsa-miR-424-5p	hsa-miR-375
WP299_Nuclear_receptors_in_lipid_metabolism_and_toxicity	Pathways	hsa-miR-132-3p	hsa-miR-125b-5p	hsa-miR-197-3p	hsa-miR-33b-5p	hsa-miR-125a-5p	hsa-miR-1-3p	hsa-miR-215-5p	hsa-miR-130b-3p	hsa-miR-10b-5p	hsa-miR-141-3p	hsa-miR-218-5p	hsa-miR-33a-5p	hsa-miR-31-5p	hsa-miR-16-5p	hsa-miR-148a-3p	hsa-miR-22-3p	hsa-let-7e-5p	hsa-miR-26b-5p	hsa-miR-26a-5p	hsa-miR-615-3p	hsa-miR-19a-3p	hsa-miR-519d-3p	hsa-miR-296-5p	hsa-miR-92a-3p	hsa-miR-122-5p	hsa-miR-182-5p	hsa-miR-21-5p	hsa-miR-331-3p	hsa-miR-16-2-3p	hsa-miR-10a-5p	hsa-miR-488-5p	hsa-let-7a-5p	hsa-let-7b-5p	hsa-miR-20b-5p	hsa-miR-488-3p	hsa-miR-124-3p	hsa-miR-138-5p	hsa-miR-613	hsa-miR-451a	hsa-miR-192-5p	hsa-miR-422a	hsa-miR-27a-3p	hsa-miR-320c	hsa-miR-335-5p	hsa-miR-130a-3p	hsa-miR-27b-3p
hsa03410_Base_excision_repair	Pathways	hsa-miR-18a-5p	hsa-miR-125b-5p	hsa-let-7g-5p	hsa-miR-28-5p	hsa-miR-1229-3p	hsa-miR-130b-5p	hsa-miR-149-5p	hsa-miR-1-3p	hsa-miR-215-5p	hsa-miR-30a-5p	hsa-miR-100-5p	hsa-miR-935	hsa-miR-877-3p	hsa-let-7e-5p	hsa-miR-148a-3p	hsa-miR-199a-5p	hsa-miR-99a-5p	hsa-miR-24-3p	hsa-miR-185-5p	hsa-miR-22-3p	hsa-miR-155-5p	hsa-miR-193b-3p	hsa-miR-16-5p	hsa-miR-1260b	hsa-miR-484	hsa-miR-1301-3p	hsa-miR-1225-3p	hsa-miR-615-3p	hsa-miR-93-3p	hsa-miR-30b-5p	hsa-miR-92a-3p	hsa-miR-324-3p	hsa-miR-93-5p	hsa-miR-29a-3p	hsa-miR-223-3p	hsa-miR-21-5p	hsa-miR-29c-3p	hsa-miR-874-3p	hsa-miR-652-3p	hsa-miR-148b-3p	hsa-miR-125a-5p	hsa-miR-34a-5p	hsa-miR-766-3p	hsa-miR-186-5p	hsa-miR-7-5p	hsa-miR-181d-5p	hsa-miR-17-5p	hsa-let-7b-5p
WP694_Arylamine_metabolism	Pathways	hsa-miR-25-3p	hsa-let-7b-5p	hsa-miR-26b-5p	hsa-miR-631
P04391_Oxytocin_receptor_mediated_signaling_pathway	Pathways	hsa-miR-9-5p	hsa-miR-197-3p	hsa-miR-24-2-5p	hsa-miR-1-3p	hsa-miR-215-5p	hsa-miR-130b-3p	hsa-miR-30a-5p	hsa-miR-196b-5p	hsa-miR-96-5p	hsa-miR-30c-5p	hsa-miR-31-5p	hsa-miR-16-5p	hsa-miR-148a-3p	hsa-miR-423-5p	hsa-miR-7-5p	hsa-miR-1914-3p	hsa-miR-155-5p	hsa-miR-193b-3p	hsa-let-7e-5p	hsa-miR-26b-5p	hsa-miR-484	hsa-miR-615-3p	hsa-miR-331-3p	hsa-miR-205-5p	hsa-miR-505-3p	hsa-miR-142-3p	hsa-miR-92a-3p	hsa-miR-342-3p	hsa-miR-93-5p	hsa-miR-324-5p	hsa-miR-21-5p	hsa-miR-29c-3p	hsa-miR-505-5p	hsa-miR-34a-5p	hsa-miR-186-5p	hsa-miR-128-3p	hsa-miR-19b-3p	hsa-miR-17-5p	hsa-let-7b-5p	hsa-miR-181a-5p	hsa-miR-98-5p	hsa-miR-17-3p	hsa-miR-133a-3p	hsa-miR-92b-3p	hsa-miR-124-3p	hsa-miR-192-5p	hsa-miR-589-3p	hsa-miR-27b-3p
hsa00140_Steroid_hormone_biosynthesis	Pathways	hsa-miR-1-3p	hsa-miR-215-5p	hsa-miR-100-5p	hsa-let-7f-5p	hsa-miR-191-5p	hsa-miR-16-5p	hsa-miR-874-3p	hsa-miR-340-5p	hsa-miR-296-3p	hsa-miR-193b-3p	hsa-miR-26b-5p	hsa-miR-27b-3p	hsa-miR-142-3p	hsa-miR-92a-3p	hsa-miR-122-5p	hsa-miR-199a-5p	hsa-miR-148b-3p	hsa-miR-19b-3p	hsa-miR-221-3p	hsa-miR-181a-5p	hsa-miR-98-5p	hsa-miR-124-3p	hsa-miR-192-5p	hsa-miR-422a	hsa-miR-155-5p	hsa-miR-335-5p	hsa-miR-106a-5p
P04379_Beta3_adrenergic_receptor_signaling_pathway	Pathways	hsa-miR-1-3p	hsa-miR-130b-3p	hsa-miR-30a-5p	hsa-miR-100-5p	hsa-let-7e-5p	hsa-miR-148a-3p	hsa-miR-99a-5p	hsa-miR-7-5p	hsa-miR-155-5p	hsa-miR-193b-3p	hsa-miR-16-5p	hsa-miR-26b-5p	hsa-miR-484	hsa-miR-331-3p	hsa-miR-505-3p	hsa-miR-92a-3p	hsa-miR-93-5p	hsa-miR-324-5p	hsa-miR-21-5p	hsa-miR-29c-3p	hsa-miR-10a-5p	hsa-miR-34a-5p	hsa-miR-186-5p	hsa-miR-423-5p	hsa-miR-19b-3p	hsa-miR-17-5p	hsa-let-7b-5p	hsa-miR-98-5p	hsa-miR-128-3p	hsa-miR-92b-3p	hsa-miR-124-3p	hsa-miR-589-3p	hsa-miR-27b-3p	hsa-miR-27a-3p	hsa-miR-744-5p	hsa-miR-101-3p	hsa-miR-23a-3p	hsa-miR-335-5p	hsa-miR-425-5p	hsa-miR-375	hsa-miR-106a-5p	hsa-miR-103a-3p
P04385_Histamine_H1_receptor_mediated_signaling_pathway	Pathways	hsa-miR-9-5p	hsa-miR-197-3p	hsa-miR-24-2-5p	hsa-miR-1-3p	hsa-miR-215-5p	hsa-miR-130b-3p	hsa-miR-30a-5p	hsa-miR-100-5p	hsa-miR-96-5p	hsa-miR-615-3p	hsa-miR-877-3p	hsa-miR-31-5p	hsa-let-7e-5p	hsa-miR-148a-3p	hsa-miR-340-5p	hsa-miR-186-5p	hsa-miR-1914-3p	hsa-miR-155-5p	hsa-miR-193b-3p	hsa-miR-16-5p	hsa-miR-26b-5p	hsa-miR-484	hsa-miR-935	hsa-miR-331-3p	hsa-miR-205-5p	hsa-miR-505-3p	hsa-miR-142-3p	hsa-miR-92a-3p	hsa-miR-342-3p	hsa-miR-93-5p	hsa-miR-324-5p	hsa-miR-21-5p	hsa-miR-29c-3p	hsa-miR-320a	hsa-miR-34a-5p	hsa-miR-505-5p	hsa-miR-423-5p	hsa-miR-17-5p	hsa-miR-1226-3p	hsa-let-7b-5p	hsa-miR-181a-5p	hsa-miR-98-5p	hsa-miR-17-3p	hsa-miR-23b-3p	hsa-miR-30c-5p	hsa-miR-128-3p	hsa-miR-92b-3p	hsa-miR-32-5p
WP453_Inflammatory_Response_Pathway	Pathways	hsa-miR-132-3p	hsa-let-7g-5p	hsa-miR-17-5p	hsa-miR-125a-5p	hsa-miR-1-3p	hsa-miR-30a-5p	hsa-miR-196b-5p	hsa-miR-455-3p	hsa-miR-10b-5p	hsa-let-7b-5p	hsa-miR-30a-3p	hsa-miR-16-5p	hsa-miR-15b-5p	hsa-miR-7-5p	hsa-miR-34c-5p	hsa-miR-193b-3p	hsa-miR-143-3p	hsa-miR-26b-5p	hsa-miR-484	hsa-miR-148b-3p	hsa-miR-15a-5p	hsa-miR-615-3p	hsa-miR-331-3p	hsa-miR-205-5p	hsa-miR-92a-3p	hsa-miR-409-3p	hsa-miR-486-5p	hsa-miR-29c-3p	hsa-miR-200b-3p	hsa-miR-10a-5p	hsa-miR-34a-5p	hsa-miR-224-5p	hsa-let-7d-5p	hsa-let-7a-5p	hsa-miR-146a-5p	hsa-miR-500a-3p	hsa-miR-98-5p	hsa-miR-29b-3p	hsa-miR-133a-3p	hsa-miR-124-3p	hsa-miR-34b-3p	hsa-miR-181c-5p	hsa-miR-20a-5p	hsa-miR-199b-5p	hsa-miR-155-5p	hsa-miR-335-5p	hsa-miR-320a	hsa-miR-454-5p
WP1545_miRNAs_involved_in_DDR	Pathways	hsa-miR-125b-5p	hsa-miR-210-3p	hsa-miR-150-5p	hsa-miR-125a-5p	hsa-miR-130b-3p	hsa-miR-96-5p	hsa-miR-218-5p	hsa-miR-30a-3p	hsa-miR-942-5p	hsa-miR-214-3p	hsa-miR-149-3p	hsa-miR-34c-5p	hsa-miR-22-3p	hsa-miR-26b-5p	hsa-miR-484	hsa-miR-615-3p	hsa-miR-196a-5p	hsa-miR-1229-3p	hsa-miR-92a-3p	hsa-miR-342-3p	hsa-miR-182-5p	hsa-miR-324-5p	hsa-miR-520b	hsa-miR-19b-1-5p	hsa-miR-338-3p	hsa-miR-505-5p	hsa-miR-423-5p	hsa-miR-190a-5p	hsa-miR-519c-3p	hsa-miR-98-5p	hsa-let-7i-5p	hsa-miR-657	hsa-miR-1303	hsa-miR-106b-5p	hsa-miR-124-3p	hsa-miR-744-5p	hsa-miR-101-3p	hsa-miR-374a-5p	hsa-miR-503-5p	hsa-miR-18a-3p	hsa-miR-223-3p	hsa-miR-328-3p	hsa-miR-302c-3p	hsa-miR-520a-3p	hsa-miR-3144-3p	hsa-miR-877-3p	hsa-miR-30a-5p	hsa-miR-1285-3p
WP1591_Heart_Development	Pathways	hsa-miR-125b-5p	hsa-miR-150-5p	hsa-miR-125a-5p	hsa-miR-941	hsa-miR-130b-3p	hsa-miR-218-5p	hsa-miR-214-3p	hsa-miR-34c-5p	hsa-miR-22-3p	hsa-miR-26b-5p	hsa-miR-484	hsa-miR-204-5p	hsa-miR-196a-5p	hsa-miR-98-5p	hsa-miR-92a-3p	hsa-miR-182-5p	hsa-miR-324-5p	hsa-miR-520h	hsa-miR-532-3p	hsa-miR-483-3p	hsa-miR-199a-3p	hsa-miR-30d-5p	hsa-miR-144-3p	hsa-miR-361-3p	hsa-miR-320a	hsa-miR-92b-3p	hsa-miR-124-3p	hsa-miR-106b-5p	hsa-miR-766-3p	hsa-miR-181c-5p	hsa-miR-744-5p	hsa-miR-101-3p	hsa-miR-134-5p	hsa-miR-503-5p	hsa-miR-200c-3p	hsa-miR-18a-3p	hsa-miR-10b-5p	hsa-miR-302c-3p	hsa-miR-130b-5p	hsa-miR-383-5p	hsa-miR-30a-5p	hsa-miR-455-3p	hsa-miR-151a-5p	hsa-miR-15b-5p	hsa-miR-129-5p	hsa-miR-7-5p	hsa-miR-26a-5p	hsa-miR-15a-5p
WP28_Selenium_Metabolism_and_Selenoproteins	Pathways	hsa-miR-9-5p	hsa-miR-139-5p	hsa-miR-671-5p	hsa-miR-210-3p	hsa-miR-149-5p	hsa-miR-346	hsa-miR-1-3p	hsa-miR-215-5p	hsa-miR-30a-5p	hsa-miR-100-5p	hsa-miR-96-5p	hsa-miR-16-5p	hsa-miR-186-5p	hsa-miR-7-5p	hsa-miR-222-3p	hsa-miR-373-3p	hsa-miR-146b-5p	hsa-miR-193b-3p	hsa-let-7e-5p	hsa-miR-26b-5p	hsa-miR-484	hsa-miR-1301-3p	hsa-miR-15a-5p	hsa-miR-615-3p	hsa-miR-331-3p	hsa-miR-92a-3p	hsa-miR-342-3p	hsa-miR-93-5p	hsa-miR-29b-3p	hsa-miR-324-5p	hsa-miR-21-5p	hsa-miR-423-3p	hsa-miR-29c-3p	hsa-miR-125a-5p	hsa-miR-34a-5p	hsa-miR-221-3p	hsa-miR-504-5p	hsa-miR-30e-5p	hsa-let-7a-5p	hsa-miR-146a-5p	hsa-miR-181a-5p	hsa-miR-17-3p	hsa-miR-92b-3p	hsa-miR-124-3p	hsa-miR-106b-5p	hsa-miR-192-5p	hsa-miR-20a-5p	hsa-miR-27a-3p
hsa00052_Galactose_metabolism	Pathways	hsa-miR-18a-5p	hsa-miR-125b-5p	hsa-miR-197-3p	hsa-miR-671-5p	hsa-miR-520a-3p	hsa-miR-99b-5p	hsa-miR-125a-5p	hsa-miR-1-3p	hsa-miR-30a-5p	hsa-miR-455-3p	hsa-miR-10b-5p	hsa-miR-16-5p	hsa-miR-15b-5p	hsa-miR-93-5p	hsa-miR-330-5p	hsa-miR-193b-3p	hsa-miR-143-3p	hsa-miR-26b-5p	hsa-miR-484	hsa-miR-15a-5p	hsa-miR-615-3p	hsa-miR-148a-5p	hsa-miR-92a-3p	hsa-miR-1296-5p	hsa-miR-122-5p	hsa-miR-342-5p	hsa-miR-346	hsa-miR-520b	hsa-miR-520e	hsa-miR-10a-5p	hsa-miR-149-5p	hsa-miR-34a-5p	hsa-miR-221-3p	hsa-miR-1226-3p	hsa-let-7b-5p	hsa-miR-98-5p	hsa-miR-769-5p	hsa-miR-23b-3p	hsa-miR-128-3p	hsa-miR-423-3p	hsa-miR-32-5p	hsa-miR-124-3p	hsa-miR-106b-5p	hsa-miR-20a-5p	hsa-miR-155-5p	hsa-miR-23a-3p	hsa-miR-335-5p	hsa-miR-320a
hsa00120_Primary_bile_acid_biosynthesis	Pathways	hsa-miR-769-5p	hsa-miR-9-5p	hsa-miR-26b-5p	hsa-miR-10a-5p	hsa-miR-1260b	hsa-miR-484	hsa-miR-1-3p	hsa-miR-193b-3p	hsa-miR-335-5p	hsa-miR-92a-3p	hsa-miR-122-5p	hsa-miR-422a	hsa-miR-324-5p
hsa00982_Drug_metabolism___cytochrome_P450	Pathways	hsa-miR-132-3p	hsa-miR-9-5p	hsa-miR-197-3p	hsa-miR-1-3p	hsa-miR-30a-5p	hsa-miR-96-5p	hsa-let-7e-5p	hsa-miR-7-5p	hsa-miR-185-5p	hsa-miR-22-3p	hsa-miR-340-3p	hsa-miR-16-5p	hsa-miR-26b-5p	hsa-miR-196a-5p	hsa-miR-142-3p	hsa-miR-92a-3p	hsa-miR-122-5p	hsa-miR-652-3p	hsa-miR-148b-3p	hsa-miR-145-5p	hsa-miR-488-5p	hsa-let-7b-5p	hsa-miR-181a-5p	hsa-miR-133a-3p	hsa-miR-92b-3p	hsa-miR-488-3p	hsa-miR-124-3p	hsa-miR-106b-5p	hsa-miR-107	hsa-miR-155-5p	hsa-miR-335-5p	hsa-miR-320a	hsa-miR-513a-3p	hsa-miR-27b-3p	hsa-miR-103a-3p
P02723_Adenine_and_hypoxanthine_salvage_pathway	Pathways	hsa-miR-15b-5p	hsa-miR-186-5p	hsa-miR-133a-3p	hsa-miR-124-3p	hsa-miR-10a-5p	hsa-miR-1296-5p	hsa-miR-26b-5p	hsa-miR-484	hsa-miR-34a-5p	hsa-miR-1-3p	hsa-miR-193b-3p	hsa-miR-196a-5p	hsa-miR-324-3p	hsa-miR-30c-5p	hsa-let-7b-5p	hsa-miR-16-5p	hsa-miR-98-5p
P02752_Mannose_metabolism	Pathways	hsa-miR-155-5p	hsa-miR-148b-3p	hsa-miR-26b-5p	hsa-miR-484	hsa-miR-193b-3p	hsa-miR-877-5p	hsa-miR-328-3p	hsa-miR-320a	hsa-miR-877-3p	hsa-miR-4326	hsa-miR-324-5p
hsa00830_Retinol_metabolism	Pathways	hsa-miR-132-3p	hsa-miR-125b-5p	hsa-miR-34a-5p	hsa-miR-130b-3p	hsa-miR-30a-5p	hsa-let-7e-5p	hsa-miR-590-3p	hsa-miR-296-3p	hsa-miR-193b-3p	hsa-miR-16-5p	hsa-miR-26b-5p	hsa-miR-484	hsa-miR-615-3p	hsa-miR-196a-5p	hsa-miR-142-3p	hsa-miR-92a-3p	hsa-miR-21-5p	hsa-miR-10a-5p	hsa-miR-19b-3p	hsa-miR-7-5p	hsa-miR-181d-5p	hsa-let-7b-5p	hsa-miR-32-5p	hsa-miR-124-3p	hsa-miR-106b-5p	hsa-miR-183-5p	hsa-miR-106a-5p	hsa-miR-107	hsa-miR-155-5p	hsa-miR-335-5p	hsa-miR-375	hsa-miR-27b-3p	hsa-miR-103a-3p
P00014_Cholesterol_biosynthesis	Pathways	hsa-miR-18a-5p	hsa-miR-125b-5p	hsa-miR-149-5p	hsa-miR-215-5p	hsa-miR-30a-5p	hsa-miR-96-5p	hsa-miR-10b-5p	hsa-let-7e-5p	hsa-miR-193b-3p	hsa-miR-26b-5p	hsa-miR-1301-3p	hsa-miR-615-3p	hsa-miR-148b-3p	hsa-miR-92a-3p	hsa-miR-30c-2-3p	hsa-miR-29c-3p	hsa-miR-10a-5p	hsa-miR-19b-3p	hsa-miR-186-5p	hsa-let-7b-5p	hsa-miR-769-3p	hsa-miR-98-5p	hsa-miR-32-5p	hsa-miR-124-3p	hsa-miR-106b-5p	hsa-miR-192-5p	hsa-miR-3176	hsa-miR-155-5p	hsa-miR-335-5p	hsa-miR-320a	hsa-miR-760
WP455_GPCRs_Class_A_Rhodopsin_like	Pathways	hsa-miR-203a-3p	hsa-miR-150-5p	hsa-miR-1-3p	hsa-miR-215-5p	hsa-miR-877-5p	hsa-miR-196b-5p	hsa-miR-96-5p	hsa-miR-10b-5p	hsa-miR-877-3p	hsa-miR-16-5p	hsa-miR-148a-3p	hsa-miR-99a-5p	hsa-miR-296-3p	hsa-miR-22-3p	hsa-miR-744-5p	hsa-miR-26b-5p	hsa-miR-484	hsa-miR-10a-5p	hsa-miR-142-3p	hsa-miR-21-5p	hsa-miR-7-5p	hsa-miR-148b-3p	hsa-miR-200c-3p	hsa-miR-504-5p	hsa-let-7d-5p	hsa-let-7a-5p	hsa-miR-146a-5p	hsa-miR-181a-5p	hsa-miR-98-5p	hsa-miR-128-3p	hsa-miR-17-3p	hsa-miR-124-3p	hsa-miR-106b-5p	hsa-miR-802	hsa-miR-183-5p	hsa-miR-192-5p	hsa-miR-27b-3p	hsa-miR-155-5p	hsa-miR-335-5p	hsa-miR-320a	hsa-miR-224-5p	hsa-miR-107
P02774_Salvage_pyrimidine_deoxyribonucleotides	Pathways	hsa-miR-193b-3p	hsa-miR-26b-5p	hsa-miR-335-5p	hsa-miR-103a-3p	hsa-miR-186-3p
WP23_B_Cell_Receptor_Signaling_Pathway	Pathways	hsa-miR-125b-5p	hsa-miR-210-3p	hsa-miR-125a-5p	hsa-miR-1226-3p	hsa-miR-96-5p	hsa-miR-218-5p	hsa-miR-877-3p	hsa-miR-33a-5p	hsa-miR-143-3p	hsa-miR-214-3p	hsa-miR-149-3p	hsa-miR-296-3p	hsa-miR-34c-5p	hsa-miR-373-3p	hsa-miR-26b-5p	hsa-miR-484	hsa-miR-615-3p	hsa-miR-497-5p	hsa-miR-196a-5p	hsa-miR-361-3p	hsa-miR-1229-3p	hsa-miR-92a-3p	hsa-miR-342-3p	hsa-miR-182-5p	hsa-miR-1914-3p	hsa-miR-320b	hsa-miR-140-3p	hsa-miR-766-3p	hsa-miR-423-5p	hsa-miR-181d-5p	hsa-miR-199a-3p	hsa-miR-98-5p	hsa-miR-92b-3p	hsa-miR-32-5p	hsa-miR-124-3p	hsa-miR-106b-5p	hsa-miR-129-1-3p	hsa-miR-744-5p	hsa-miR-101-3p	hsa-miR-200c-3p	hsa-miR-302c-3p	hsa-miR-130b-5p	hsa-miR-10a-3p	hsa-miR-25-3p	hsa-miR-30a-5p	hsa-miR-30e-3p	hsa-miR-15b-5p	hsa-miR-99a-5p
hsa04740_Olfactory_transduction	Pathways	hsa-miR-125b-5p	hsa-miR-9-5p	hsa-miR-598-3p	hsa-miR-149-5p	hsa-miR-1-3p	hsa-miR-877-5p	hsa-miR-196b-5p	hsa-miR-16-5p	hsa-miR-148a-3p	hsa-miR-99a-5p	hsa-miR-7-5p	hsa-miR-365a-3p	hsa-miR-22-3p	hsa-miR-330-5p	hsa-miR-146b-5p	hsa-let-7e-5p	hsa-miR-26b-5p	hsa-miR-484	hsa-miR-1301-3p	hsa-miR-615-3p	hsa-miR-331-3p	hsa-miR-148b-3p	hsa-miR-1296-5p	hsa-miR-93-5p	hsa-miR-10a-5p	hsa-miR-219a-5p	hsa-miR-186-5p	hsa-miR-19b-3p	hsa-let-7a-5p	hsa-let-7b-5p	hsa-miR-181a-5p	hsa-miR-339-5p	hsa-miR-128-3p	hsa-miR-92b-3p	hsa-miR-124-3p	hsa-miR-106b-5p	hsa-miR-1303	hsa-miR-192-5p	hsa-miR-744-5p	hsa-miR-335-5p	hsa-miR-320a	hsa-miR-375	hsa-miR-27b-3p
WP678_Arachidonate_Epoxygenase___Epoxide_Hydrolase	Pathways	hsa-miR-133a-3p	hsa-miR-26b-5p	hsa-miR-484	hsa-miR-20a-5p	hsa-miR-100-5p	hsa-miR-513a-3p	hsa-miR-92a-3p	hsa-let-7b-5p	hsa-miR-107	hsa-miR-103a-3p	hsa-miR-324-5p
WP286_IL_3_Signaling_Pathway	Pathways	hsa-miR-125b-5p	hsa-miR-24-2-5p	hsa-miR-96-5p	hsa-miR-218-5p	hsa-miR-33a-5p	hsa-miR-143-3p	hsa-miR-214-3p	hsa-miR-149-3p	hsa-miR-34c-5p	hsa-miR-22-3p	hsa-miR-26b-5p	hsa-miR-484	hsa-miR-204-5p	hsa-miR-497-5p	hsa-miR-1229-3p	hsa-miR-92a-3p	hsa-miR-342-3p	hsa-miR-182-5p	hsa-miR-125a-5p	hsa-miR-766-3p	hsa-miR-181d-5p	hsa-miR-199a-3p	hsa-miR-98-5p	hsa-miR-92b-3p	hsa-miR-32-5p	hsa-miR-124-3p	hsa-miR-106b-5p	hsa-miR-181c-5p	hsa-miR-744-5p	hsa-miR-101-3p	hsa-miR-200c-3p	hsa-miR-328-3p	hsa-miR-302c-3p	hsa-miR-491-5p	hsa-miR-130b-5p	hsa-miR-30c-5p	hsa-miR-30a-5p	hsa-miR-148a-3p	hsa-miR-15b-5p	hsa-miR-7-5p	hsa-miR-15a-5p	hsa-miR-429	hsa-miR-296-5p	hsa-miR-421	hsa-miR-324-3p	hsa-miR-93-5p	hsa-miR-29a-3p	hsa-miR-483-5p
WP138_Androgen_receptor_signaling_pathway	Pathways	hsa-miR-125b-5p	hsa-miR-2110	hsa-miR-150-5p	hsa-miR-19b-1-5p	hsa-miR-1226-3p	hsa-miR-96-5p	hsa-miR-519c-3p	hsa-miR-30a-3p	hsa-miR-942-5p	hsa-miR-143-3p	hsa-miR-214-3p	hsa-miR-149-3p	hsa-miR-296-3p	hsa-miR-34c-5p	hsa-miR-671-5p	hsa-miR-26b-5p	hsa-miR-484	hsa-miR-204-5p	hsa-miR-500a-3p	hsa-miR-196a-5p	hsa-miR-188-5p	hsa-miR-1229-3p	hsa-miR-92a-3p	hsa-miR-342-3p	hsa-miR-182-5p	hsa-miR-324-5p	hsa-miR-520b	hsa-miR-657	hsa-miR-373-3p	hsa-miR-125a-5p	hsa-miR-615-3p	hsa-miR-338-3p	hsa-miR-483-3p	hsa-miR-505-5p	hsa-miR-423-5p	hsa-miR-181d-5p	hsa-miR-30d-5p	hsa-miR-144-3p	hsa-miR-98-5p	hsa-miR-320a	hsa-miR-92b-3p	hsa-miR-877-3p	hsa-miR-124-3p	hsa-miR-106b-5p	hsa-miR-766-3p	hsa-miR-181c-5p	hsa-miR-744-5p	hsa-miR-372-3p
hsa00970_Aminoacyl_tRNA_biosynthesis	Pathways	hsa-miR-9-5p	hsa-miR-26a-5p	hsa-miR-197-3p	hsa-miR-218-5p	hsa-miR-149-5p	hsa-miR-215-5p	hsa-miR-130b-3p	hsa-miR-30a-5p	hsa-miR-100-5p	hsa-miR-935	hsa-miR-30d-5p	hsa-miR-877-3p	hsa-miR-191-5p	hsa-miR-16-5p	hsa-miR-15b-5p	hsa-miR-99a-5p	hsa-miR-186-5p	hsa-miR-296-3p	hsa-miR-222-3p	hsa-miR-155-5p	hsa-miR-193b-3p	hsa-let-7e-5p	hsa-miR-26b-5p	hsa-miR-484	hsa-miR-101-3p	hsa-miR-615-3p	hsa-miR-331-3p	hsa-miR-93-3p	hsa-miR-24-3p	hsa-miR-92a-3p	hsa-miR-342-3p	hsa-miR-93-5p	hsa-miR-29a-3p	hsa-miR-324-5p	hsa-miR-21-5p	hsa-miR-424-5p	hsa-miR-652-3p	hsa-miR-10a-5p	hsa-miR-140-3p	hsa-miR-505-5p	hsa-miR-19b-3p	hsa-miR-766-3p	hsa-miR-421	hsa-miR-221-3p	hsa-miR-760	hsa-miR-17-5p	hsa-let-7a-5p	hsa-let-7b-5p
hsa04360_Axon_guidance	Pathways	hsa-miR-125b-5p	hsa-miR-210-3p	hsa-miR-150-5p	hsa-miR-125a-5p	hsa-miR-130b-3p	hsa-miR-96-5p	hsa-miR-9-3p	hsa-miR-877-3p	hsa-miR-143-3p	hsa-miR-214-3p	hsa-miR-34c-5p	hsa-miR-373-3p	hsa-miR-26b-5p	hsa-miR-484	hsa-miR-204-5p	hsa-miR-196a-5p	hsa-miR-98-5p	hsa-miR-92a-3p	hsa-miR-342-3p	hsa-miR-324-5p	hsa-miR-615-3p	hsa-miR-532-3p	hsa-miR-766-3p	hsa-miR-423-5p	hsa-miR-181d-5p	hsa-miR-199a-3p	hsa-miR-30d-5p	hsa-miR-500a-3p	hsa-miR-361-3p	hsa-miR-92b-3p	hsa-miR-124-3p	hsa-miR-106b-5p	hsa-miR-1303	hsa-miR-181c-5p	hsa-miR-744-5p	hsa-miR-101-3p	hsa-miR-200c-3p	hsa-miR-18a-3p	hsa-miR-342-5p	hsa-miR-193a-3p	hsa-miR-218-5p	hsa-miR-30c-5p	hsa-miR-30a-5p	hsa-miR-455-3p	hsa-miR-15b-5p	hsa-miR-7-5p	hsa-miR-1260b	hsa-miR-26a-5p
P02778_Sulfate_assimilation	Pathways	hsa-miR-18a-5p	hsa-let-7b-5p	hsa-miR-100-5p	hsa-miR-124-3p
P00015_Circadian_clock_system	Pathways	hsa-miR-590-3p	hsa-miR-340-5p	hsa-miR-21-5p	hsa-miR-494-3p	hsa-miR-484	hsa-miR-106b-5p	hsa-miR-149-5p	hsa-miR-26b-5p	hsa-miR-17-5p	hsa-miR-532-3p	hsa-miR-130b-3p	hsa-miR-24-3p	hsa-miR-335-5p	hsa-miR-141-3p	hsa-miR-142-3p	hsa-miR-30c-5p	hsa-miR-33a-5p	hsa-miR-93-5p	hsa-miR-182-5p	hsa-let-7b-5p	hsa-miR-324-5p
hsa03430_Mismatch_repair	Pathways	hsa-miR-18a-5p	hsa-miR-26a-5p	hsa-miR-130b-5p	hsa-miR-149-5p	hsa-miR-1-3p	hsa-miR-215-5p	hsa-miR-130b-3p	hsa-miR-30a-5p	hsa-miR-196b-5p	hsa-miR-96-5p	hsa-miR-877-3p	hsa-miR-31-5p	hsa-miR-16-5p	hsa-miR-24-3p	hsa-miR-222-3p	hsa-miR-744-5p	hsa-miR-193b-3p	hsa-let-7e-5p	hsa-miR-26b-5p	hsa-miR-484	hsa-miR-1301-3p	hsa-miR-15a-5p	hsa-miR-615-3p	hsa-miR-196a-5p	hsa-miR-92a-3p	hsa-miR-324-3p	hsa-miR-93-5p	hsa-miR-29a-3p	hsa-miR-324-5p	hsa-miR-21-5p	hsa-miR-326	hsa-miR-339-5p	hsa-miR-34a-5p	hsa-miR-186-5p	hsa-miR-296-3p	hsa-miR-19b-3p	hsa-miR-30e-5p	hsa-miR-1226-3p	hsa-let-7b-5p	hsa-miR-23b-3p	hsa-miR-92b-3p	hsa-miR-124-3p	hsa-miR-106b-5p	hsa-miR-183-5p	hsa-miR-192-5p	hsa-miR-20a-5p	hsa-miR-155-5p	hsa-miR-101-3p
hsa00591_Linoleic_acid_metabolism	Pathways	hsa-miR-132-3p	hsa-miR-9-5p	hsa-miR-128-3p	hsa-miR-146b-5p	hsa-miR-92b-3p	hsa-miR-488-3p	hsa-miR-124-3p	hsa-miR-10a-5p	hsa-miR-338-3p	hsa-miR-98-5p	hsa-miR-15a-5p	hsa-miR-27b-3p	hsa-miR-145-5p	hsa-miR-449c-5p	hsa-miR-30a-5p	hsa-miR-488-5p	hsa-miR-335-5p	hsa-let-7b-5p	hsa-miR-107	hsa-miR-103a-3p
WP75_Toll_Like_Receptor_signaling	Pathways	hsa-miR-125b-5p	hsa-miR-210-3p	hsa-miR-19b-1-5p	hsa-let-7a-5p	hsa-miR-96-5p	hsa-miR-218-5p	hsa-miR-877-3p	hsa-miR-33a-5p	hsa-miR-143-3p	hsa-miR-214-3p	hsa-miR-149-3p	hsa-miR-296-3p	hsa-miR-22-3p	hsa-miR-26b-5p	hsa-miR-484	hsa-miR-204-5p	hsa-miR-497-5p	hsa-miR-196a-5p	hsa-miR-92a-3p	hsa-miR-342-3p	hsa-miR-324-5p	hsa-miR-486-5p	hsa-miR-320b	hsa-miR-125a-5p	hsa-miR-615-3p	hsa-miR-766-3p	hsa-miR-423-5p	hsa-miR-199a-3p	hsa-miR-30d-5p	hsa-miR-98-5p	hsa-let-7i-5p	hsa-miR-92b-3p	hsa-miR-124-3p	hsa-miR-106b-5p	hsa-miR-744-5p	hsa-miR-101-3p	hsa-miR-151a-3p	hsa-miR-200c-3p	hsa-miR-18a-3p	hsa-miR-10b-5p	hsa-miR-302c-3p	hsa-miR-105-5p	hsa-miR-30a-5p	hsa-miR-15b-5p	hsa-miR-7-5p	hsa-miR-26a-5p	hsa-miR-15a-5p	hsa-miR-296-5p
WP550_Biogenic_Amine_Synthesis	Pathways	hsa-miR-26b-5p	hsa-miR-30b-5p	hsa-miR-16-5p	hsa-miR-335-5p	hsa-miR-22-3p
hsa05220_Chronic_myeloid_leukemia	Pathways	hsa-miR-125b-5p	hsa-miR-210-3p	hsa-miR-150-5p	hsa-miR-19b-1-5p	hsa-miR-675-5p	hsa-miR-130b-3p	hsa-miR-96-5p	hsa-miR-141-3p	hsa-miR-218-5p	hsa-miR-877-3p	hsa-miR-942-5p	hsa-miR-143-3p	hsa-miR-214-3p	hsa-miR-149-3p	hsa-miR-296-3p	hsa-miR-34c-5p	hsa-miR-22-3p	hsa-miR-324-3p	hsa-miR-26b-5p	hsa-miR-484	hsa-miR-615-3p	hsa-miR-497-5p	hsa-miR-196a-5p	hsa-miR-1229-3p	hsa-miR-92a-3p	hsa-miR-342-3p	hsa-miR-182-5p	hsa-miR-324-5p	hsa-miR-520b	hsa-miR-125a-5p	hsa-miR-338-3p	hsa-miR-766-3p	hsa-miR-423-5p	hsa-miR-190a-5p	hsa-miR-181d-5p	hsa-miR-199a-3p	hsa-miR-519c-3p	hsa-miR-98-5p	hsa-miR-657	hsa-miR-92b-3p	hsa-miR-32-5p	hsa-miR-1303	hsa-miR-106b-5p	hsa-miR-124-3p	hsa-miR-129-1-3p	hsa-miR-744-5p	hsa-miR-372-3p	hsa-miR-503-5p
hsa03022_Basal_transcription_factors	Pathways	hsa-miR-132-3p	hsa-miR-9-5p	hsa-miR-197-3p	hsa-miR-491-5p	hsa-miR-1229-3p	hsa-miR-10a-3p	hsa-miR-1-3p	hsa-miR-215-5p	hsa-miR-30a-5p	hsa-miR-100-5p	hsa-miR-96-5p	hsa-miR-877-3p	hsa-miR-33a-5p	hsa-miR-16-5p	hsa-miR-99a-5p	hsa-miR-24-3p	hsa-miR-193b-3p	hsa-let-7e-5p	hsa-miR-26b-5p	hsa-miR-484	hsa-miR-15a-5p	hsa-miR-615-3p	hsa-miR-324-3p	hsa-miR-122-5p	hsa-miR-21-5p	hsa-miR-7-5p	hsa-miR-361-5p	hsa-miR-19b-3p	hsa-miR-766-3p	hsa-miR-221-3p	hsa-miR-423-5p	hsa-miR-17-5p	hsa-let-7a-5p	hsa-let-7b-5p	hsa-miR-181a-5p	hsa-miR-181b-5p	hsa-miR-98-5p	hsa-miR-23b-3p	hsa-miR-93-5p	hsa-miR-92b-3p	hsa-miR-106b-5p	hsa-miR-192-5p	hsa-miR-877-5p	hsa-let-7c-5p	hsa-miR-155-5p	hsa-miR-335-5p	hsa-miR-424-5p	hsa-miR-374b-5p
WP106_Alanine_and_aspartate_metabolism	Pathways	hsa-miR-769-5p	hsa-miR-17-3p	hsa-miR-93-3p	hsa-miR-484	hsa-miR-125a-5p	hsa-miR-92a-3p	hsa-miR-196a-5p	hsa-miR-335-5p	hsa-miR-342-3p	hsa-miR-25-3p	hsa-let-7b-5p	hsa-miR-16-5p	hsa-miR-324-5p
WP306_Focal_Adhesion	Pathways	hsa-miR-125b-5p	hsa-miR-559	hsa-miR-19b-1-5p	hsa-let-7a-5p	hsa-miR-96-5p	hsa-miR-141-3p	hsa-miR-218-5p	hsa-miR-877-3p	hsa-miR-33a-5p	hsa-miR-143-3p	hsa-miR-214-3p	hsa-miR-149-3p	hsa-miR-296-3p	hsa-miR-34c-5p	hsa-miR-324-3p	hsa-miR-26b-5p	hsa-miR-484	hsa-miR-107	hsa-miR-615-3p	hsa-miR-144-3p	hsa-miR-497-5p	hsa-miR-196a-5p	hsa-miR-302a-3p	hsa-miR-92a-3p	hsa-miR-342-3p	hsa-miR-182-5p	hsa-miR-324-5p	hsa-miR-520b	hsa-miR-24-2-5p	hsa-miR-338-3p	hsa-miR-766-3p	hsa-miR-320b	hsa-miR-423-5p	hsa-miR-181d-5p	hsa-miR-199a-3p	hsa-miR-519c-3p	hsa-miR-500a-3p	hsa-miR-98-5p	hsa-miR-92b-3p	hsa-miR-32-5p	hsa-miR-124-3p	hsa-miR-106b-5p	hsa-miR-644a	hsa-miR-181c-5p	hsa-miR-199b-5p	hsa-miR-744-5p	hsa-miR-101-3p	hsa-miR-503-5p
hsa03440_Homologous_recombination	Pathways	hsa-miR-132-3p	hsa-miR-197-3p	hsa-miR-210-3p	hsa-miR-130b-5p	hsa-miR-149-5p	hsa-miR-1-3p	hsa-miR-215-5p	hsa-miR-130b-3p	hsa-miR-30a-5p	hsa-miR-100-5p	hsa-miR-146a-5p	hsa-miR-30c-5p	hsa-miR-93-5p	hsa-miR-31-5p	hsa-let-7e-5p	hsa-miR-99a-5p	hsa-miR-24-3p	hsa-miR-222-3p	hsa-miR-373-3p	hsa-miR-155-5p	hsa-miR-193b-3p	hsa-miR-16-5p	hsa-miR-26b-5p	hsa-miR-484	hsa-miR-1301-3p	hsa-miR-15a-5p	hsa-miR-615-3p	hsa-miR-92a-3p	hsa-miR-122-5p	hsa-miR-29a-3p	hsa-miR-324-5p	hsa-miR-346	hsa-miR-320a	hsa-miR-339-5p	hsa-miR-34a-5p	hsa-miR-186-5p	hsa-miR-19b-3p	hsa-miR-1226-3p	hsa-let-7b-5p	hsa-miR-23b-3p	hsa-miR-128-3p	hsa-miR-1245a	hsa-miR-124-3p	hsa-miR-192-5p	hsa-miR-20a-5p	hsa-miR-744-5p	hsa-miR-335-5p	hsa-miR-92a-1-5p
hsa05320_Autoimmune_thyroid_disease	Pathways	hsa-miR-9-5p	hsa-miR-152-3p	hsa-miR-486-5p	hsa-miR-1-3p	hsa-let-7e-5p	hsa-miR-148a-3p	hsa-miR-296-3p	hsa-miR-454-5p	hsa-miR-26b-5p	hsa-miR-484	hsa-miR-615-3p	hsa-miR-92a-3p	hsa-miR-122-5p	hsa-miR-21-5p	hsa-miR-148b-3p	hsa-miR-504-5p	hsa-miR-146a-5p	hsa-miR-181a-5p	hsa-miR-98-5p	hsa-miR-423-3p	hsa-miR-124-3p	hsa-miR-183-5p	hsa-miR-181c-5p	hsa-let-7f-5p	hsa-miR-155-5p	hsa-miR-335-5p	hsa-miR-224-5p	hsa-miR-106a-5p
hsa00340_Histidine_metabolism	Pathways	hsa-miR-9-5p	hsa-miR-497-5p	hsa-miR-130b-5p	hsa-miR-1-3p	hsa-miR-215-5p	hsa-let-7a-5p	hsa-miR-100-5p	hsa-miR-328-3p	hsa-miR-16-5p	hsa-miR-7-5p	hsa-miR-22-3p	hsa-miR-193b-3p	hsa-let-7e-5p	hsa-miR-26b-5p	hsa-miR-484	hsa-miR-615-3p	hsa-miR-92a-3p	hsa-miR-148b-3p	hsa-miR-34a-5p	hsa-miR-145-5p	hsa-miR-186-5p	hsa-miR-1226-3p	hsa-let-7b-5p	hsa-miR-128-3p	hsa-miR-124-3p	hsa-miR-192-5p	hsa-miR-27a-3p	hsa-miR-155-5p	hsa-miR-99b-5p	hsa-miR-335-5p	hsa-miR-375	hsa-let-7f-5p
hsa00920_Sulfur_metabolism	Pathways	hsa-miR-18a-5p	hsa-miR-186-5p	hsa-miR-199a-5p	hsa-miR-124-3p	hsa-miR-26b-5p	hsa-miR-192-5p	hsa-miR-1-3p	hsa-miR-215-5p	hsa-miR-631	hsa-miR-100-5p	hsa-miR-17-5p	hsa-let-7b-5p	hsa-miR-18a-3p	hsa-miR-122-5p	hsa-miR-98-5p
P02727_Androgen_estrogene_progesterone_biosynthesis	Pathways	hsa-miR-186-5p	hsa-miR-1303	hsa-miR-193b-3p	hsa-miR-192-5p	hsa-miR-215-5p	hsa-miR-744-5p	hsa-miR-335-5p	hsa-miR-181a-5p	hsa-miR-500a-3p	hsa-miR-98-5p
hsa00360_Phenylalanine_metabolism	Pathways	hsa-miR-9-5p	hsa-miR-1-3p	hsa-miR-215-5p	hsa-miR-30a-5p	hsa-miR-16-5p	hsa-miR-7-5p	hsa-miR-22-3p	hsa-miR-155-5p	hsa-miR-484	hsa-miR-93-3p	hsa-miR-196a-5p	hsa-miR-92a-3p	hsa-miR-342-3p	hsa-miR-148b-3p	hsa-miR-145-5p	hsa-miR-186-5p	hsa-let-7d-5p	hsa-let-7a-5p	hsa-let-7b-5p	hsa-miR-181a-5p	hsa-miR-423-3p	hsa-miR-769-5p	hsa-miR-17-3p	hsa-miR-124-3p	hsa-miR-451a	hsa-miR-192-5p	hsa-miR-744-5p	hsa-miR-632	hsa-miR-335-5p	hsa-miR-320a
hsa05214_Glioma	Pathways	hsa-miR-125b-5p	hsa-miR-210-3p	hsa-miR-150-5p	hsa-miR-19b-1-5p	hsa-miR-675-5p	hsa-miR-130b-3p	hsa-miR-96-5p	hsa-miR-218-5p	hsa-miR-877-3p	hsa-miR-942-5p	hsa-miR-143-3p	hsa-miR-214-3p	hsa-miR-149-3p	hsa-miR-296-3p	hsa-miR-34c-5p	hsa-miR-22-3p	hsa-miR-26b-5p	hsa-miR-484	hsa-miR-615-3p	hsa-miR-376a-3p	hsa-miR-196a-5p	hsa-miR-1229-3p	hsa-miR-92a-3p	hsa-miR-182-5p	hsa-miR-1914-3p	hsa-miR-520b	hsa-miR-125a-5p	hsa-miR-338-3p	hsa-miR-219a-5p	hsa-miR-766-3p	hsa-miR-423-5p	hsa-miR-181d-5p	hsa-miR-199a-3p	hsa-miR-519c-3p	hsa-miR-144-3p	hsa-miR-98-5p	hsa-miR-657	hsa-miR-92b-3p	hsa-miR-32-5p	hsa-miR-1303	hsa-miR-106b-5p	hsa-miR-124-3p	hsa-miR-181c-5p	hsa-miR-744-5p	hsa-miR-372-3p	hsa-miR-503-5p	hsa-miR-200c-3p	hsa-miR-18a-3p
hsa00640_Propanoate_metabolism	Pathways	hsa-miR-125b-5p	hsa-miR-197-3p	hsa-miR-497-5p	hsa-miR-152-3p	hsa-miR-130b-5p	hsa-miR-1-3p	hsa-miR-215-5p	hsa-let-7a-5p	hsa-miR-30a-5p	hsa-miR-100-5p	hsa-miR-328-3p	hsa-miR-191-5p	hsa-miR-877-3p	hsa-miR-33a-5p	hsa-miR-935	hsa-miR-16-5p	hsa-miR-25-3p	hsa-miR-15b-5p	hsa-miR-24-3p	hsa-miR-222-3p	hsa-miR-320c	hsa-miR-455-5p	hsa-miR-193b-3p	hsa-miR-26b-5p	hsa-miR-484	hsa-miR-615-3p	hsa-miR-331-3p	hsa-miR-93-3p	hsa-miR-92a-3p	hsa-miR-324-3p	hsa-miR-122-5p	hsa-miR-324-5p	hsa-miR-21-5p	hsa-miR-23b-3p	hsa-miR-148b-3p	hsa-miR-23a-3p	hsa-miR-34a-5p	hsa-miR-766-3p	hsa-miR-186-5p	hsa-miR-7-5p	hsa-miR-186-3p	hsa-miR-1226-3p	hsa-let-7b-5p	hsa-miR-185-5p	hsa-miR-98-5p	hsa-miR-339-5p	hsa-miR-128-3p	hsa-miR-423-3p
WP474_Endochondral_Ossification	Pathways	hsa-miR-125b-5p	hsa-miR-150-5p	hsa-miR-125a-5p	hsa-miR-130b-3p	hsa-miR-96-5p	hsa-miR-877-3p	hsa-miR-33a-5p	hsa-miR-143-3p	hsa-miR-149-3p	hsa-miR-296-3p	hsa-miR-22-3p	hsa-miR-26b-5p	hsa-miR-484	hsa-miR-204-5p	hsa-miR-497-5p	hsa-miR-196a-5p	hsa-miR-1229-3p	hsa-miR-92a-3p	hsa-miR-342-3p	hsa-miR-520h	hsa-miR-338-3p	hsa-miR-423-5p	hsa-miR-30d-5p	hsa-miR-98-5p	hsa-miR-92b-3p	hsa-miR-32-5p	hsa-miR-124-3p	hsa-miR-106b-5p	hsa-miR-107	hsa-miR-499a-5p	hsa-miR-744-5p	hsa-miR-101-3p	hsa-miR-196b-5p	hsa-miR-134-5p	hsa-miR-503-5p	hsa-miR-200c-3p	hsa-let-7e-5p	hsa-miR-302c-3p	hsa-miR-383-5p	hsa-miR-30c-5p	hsa-miR-30a-5p	hsa-miR-455-3p	hsa-miR-199a-5p	hsa-miR-15b-5p	hsa-miR-99a-5p	hsa-miR-7-5p	hsa-miR-15a-5p	hsa-miR-505-5p
P00058_mRNA_splicing	Pathways	hsa-miR-30c-5p	hsa-miR-186-5p	hsa-miR-24-3p	hsa-miR-16-5p	hsa-miR-193a-3p
hsa05322_Systemic_lupus_erythematosus	Pathways	hsa-miR-125b-5p	hsa-miR-99b-3p	hsa-miR-1226-3p	hsa-miR-96-5p	hsa-miR-218-5p	hsa-miR-877-3p	hsa-miR-296-3p	hsa-miR-22-3p	hsa-miR-26b-5p	hsa-miR-484	hsa-miR-615-3p	hsa-miR-598-3p	hsa-miR-196a-5p	hsa-miR-361-3p	hsa-miR-1180-3p	hsa-miR-92a-3p	hsa-miR-182-5p	hsa-miR-324-5p	hsa-miR-409-3p	hsa-miR-486-5p	hsa-miR-874-3p	hsa-miR-1292-5p	hsa-miR-629-5p	hsa-miR-181d-5p	hsa-miR-98-5p	hsa-miR-92b-3p	hsa-miR-32-5p	hsa-miR-124-3p	hsa-miR-744-5p	hsa-miR-1915-3p	hsa-miR-18a-3p	hsa-miR-328-3p	hsa-miR-625-5p	hsa-miR-365a-5p	hsa-miR-455-3p	hsa-miR-15b-5p	hsa-miR-129-5p	hsa-miR-7-5p	hsa-miR-26a-5p	hsa-miR-15a-5p	hsa-miR-421	hsa-miR-324-3p	hsa-miR-93-5p	hsa-miR-652-3p	hsa-miR-148b-3p	hsa-miR-221-3p	hsa-miR-194-5p	hsa-miR-3140-3p
P04375_5HT3_type_receptor_mediated_signaling_pathway	Pathways	hsa-miR-9-5p	hsa-miR-7-5p	hsa-miR-124-3p	hsa-miR-193b-3p	hsa-miR-16-5p	hsa-miR-19b-3p	hsa-miR-505-3p	hsa-miR-34a-5p	hsa-miR-155-5p	hsa-miR-30a-5p	hsa-miR-335-5p	hsa-miR-92a-3p	hsa-let-7b-5p	hsa-miR-375	hsa-miR-98-5p
hsa04520_Adherens_junction	Pathways	hsa-miR-125b-5p	hsa-miR-559	hsa-miR-210-3p	hsa-miR-150-5p	hsa-miR-125a-5p	hsa-let-7a-5p	hsa-miR-96-5p	hsa-miR-218-5p	hsa-miR-877-3p	hsa-miR-33a-5p	hsa-miR-214-3p	hsa-miR-30a-3p	hsa-miR-296-3p	hsa-miR-34c-5p	hsa-miR-22-3p	hsa-miR-26b-5p	hsa-miR-484	hsa-miR-615-3p	hsa-miR-497-5p	hsa-miR-196a-5p	hsa-miR-1229-3p	hsa-miR-92a-3p	hsa-miR-342-3p	hsa-miR-182-5p	hsa-miR-324-5p	hsa-miR-1224-5p	hsa-miR-320b	hsa-miR-532-3p	hsa-miR-483-3p	hsa-miR-423-5p	hsa-miR-181d-5p	hsa-miR-199a-3p	hsa-miR-19b-3p	hsa-miR-98-5p	hsa-miR-92b-3p	hsa-miR-454-3p	hsa-miR-644a	hsa-miR-106b-5p	hsa-miR-766-3p	hsa-miR-124-3p	hsa-miR-181c-5p	hsa-miR-199b-5p	hsa-miR-744-5p	hsa-miR-101-3p	hsa-miR-374a-5p	hsa-miR-200c-3p	hsa-miR-328-3p	hsa-miR-139-5p
hsa04623_Cytosolic_DNA_sensing_pathway	Pathways	hsa-miR-9-5p	hsa-miR-26a-5p	hsa-miR-197-3p	hsa-miR-210-3p	hsa-miR-149-5p	hsa-miR-346	hsa-miR-625-5p	hsa-miR-130b-3p	hsa-miR-151a-3p	hsa-miR-96-5p	hsa-miR-615-3p	hsa-miR-218-5p	hsa-miR-25-3p	hsa-miR-16-5p	hsa-miR-186-5p	hsa-miR-24-3p	hsa-miR-365a-3p	hsa-miR-195-5p	hsa-miR-146b-5p	hsa-let-7e-5p	hsa-miR-146a-5p	hsa-miR-484	hsa-miR-1301-3p	hsa-miR-15a-5p	hsa-miR-204-5p	hsa-miR-331-3p	hsa-miR-296-5p	hsa-miR-92a-3p	hsa-miR-93-5p	hsa-let-7a-5p	hsa-miR-223-3p	hsa-miR-21-5p	hsa-miR-30e-3p	hsa-miR-199a-5p	hsa-miR-10a-5p	hsa-miR-125a-5p	hsa-miR-34a-5p	hsa-miR-145-5p	hsa-miR-221-3p	hsa-miR-7-5p	hsa-miR-30e-5p	hsa-miR-1226-3p	hsa-let-7b-5p	hsa-miR-769-3p	hsa-miR-1-3p	hsa-miR-98-5p	hsa-miR-373-3p	hsa-miR-23b-3p
hsa04640_Hematopoietic_cell_lineage	Pathways	hsa-miR-132-3p	hsa-miR-9-5p	hsa-miR-484	hsa-miR-197-3p	hsa-miR-211-5p	hsa-miR-708-5p	hsa-miR-1229-3p	hsa-miR-150-5p	hsa-miR-125a-5p	hsa-miR-520c-3p	hsa-miR-1-3p	hsa-miR-215-5p	hsa-miR-130b-3p	hsa-miR-30a-5p	hsa-miR-196b-5p	hsa-miR-330-3p	hsa-miR-328-3p	hsa-miR-191-5p	hsa-miR-30c-5p	hsa-miR-216a-5p	hsa-miR-31-5p	hsa-miR-16-5p	hsa-miR-379-5p	hsa-miR-203a-3p	hsa-miR-15b-5p	hsa-miR-186-5p	hsa-miR-24-3p	hsa-miR-365a-3p	hsa-miR-373-3p	hsa-miR-744-5p	hsa-miR-130a-3p	hsa-miR-26b-5p	hsa-miR-26a-5p	hsa-miR-204-5p	hsa-miR-331-3p	hsa-miR-148b-3p	hsa-miR-505-3p	hsa-miR-30b-5p	hsa-miR-92a-3p	hsa-miR-608	hsa-miR-221-3p	hsa-miR-21-5p	hsa-miR-326	hsa-miR-10a-5p	hsa-miR-34a-5p	hsa-miR-181c-5p	hsa-miR-199a-3p	hsa-let-7a-5p
P00001_Adrenaline_and_noradrenaline_biosynthesis	Pathways	hsa-miR-18a-5p	hsa-miR-215-5p	hsa-miR-30a-5p	hsa-miR-196b-5p	hsa-miR-33a-5p	hsa-miR-16-5p	hsa-miR-7-5p	hsa-miR-22-3p	hsa-miR-193b-3p	hsa-miR-26b-5p	hsa-miR-505-3p	hsa-miR-148b-3p	hsa-miR-34a-5p	hsa-miR-19b-3p	hsa-let-7b-5p	hsa-miR-98-5p	hsa-miR-23b-3p	hsa-miR-124-3p	hsa-miR-106b-5p	hsa-miR-192-5p	hsa-miR-155-5p	hsa-miR-23a-3p	hsa-miR-335-5p
hsa05218_Melanoma	Pathways	hsa-miR-125b-5p	hsa-miR-210-3p	hsa-miR-150-5p	hsa-miR-125a-5p	hsa-miR-675-5p	hsa-miR-130b-3p	hsa-miR-96-5p	hsa-miR-218-5p	hsa-miR-877-3p	hsa-miR-942-5p	hsa-miR-143-3p	hsa-miR-214-3p	hsa-miR-149-3p	hsa-miR-296-3p	hsa-miR-34c-5p	hsa-miR-22-3p	hsa-miR-26b-5p	hsa-miR-484	hsa-miR-615-3p	hsa-miR-497-5p	hsa-miR-196a-5p	hsa-miR-1229-3p	hsa-miR-92a-3p	hsa-miR-182-5p	hsa-miR-324-5p	hsa-miR-520b	hsa-miR-19b-1-5p	hsa-miR-338-3p	hsa-miR-766-3p	hsa-miR-423-5p	hsa-miR-181d-5p	hsa-miR-199a-3p	hsa-miR-519c-3p	hsa-miR-144-3p	hsa-miR-98-5p	hsa-miR-657	hsa-miR-92b-3p	hsa-miR-32-5p	hsa-miR-1303	hsa-miR-106b-5p	hsa-miR-124-3p	hsa-miR-181c-5p	hsa-miR-744-5p	hsa-miR-372-3p	hsa-miR-503-5p	hsa-miR-18a-3p	hsa-miR-328-3p	hsa-miR-302c-3p
P02728_Arginine_biosynthesis	Pathways	hsa-miR-92b-3p	hsa-miR-186-5p	hsa-miR-26b-5p	hsa-miR-505-5p	hsa-miR-301a-3p	hsa-miR-1-3p	hsa-miR-92a-3p	hsa-miR-455-3p	hsa-miR-34a-5p	hsa-miR-17-5p	hsa-miR-25-3p	hsa-miR-3200-3p	hsa-miR-331-3p	hsa-miR-324-5p
P00037_Ionotropic_glutamate_receptor_pathway	Pathways	hsa-miR-125b-5p	hsa-miR-1-3p	hsa-miR-215-5p	hsa-miR-30a-5p	hsa-miR-100-5p	hsa-miR-877-3p	hsa-miR-16-5p	hsa-miR-7-5p	hsa-miR-373-3p	hsa-miR-193b-3p	hsa-let-7e-5p	hsa-miR-26b-5p	hsa-miR-484	hsa-miR-505-3p	hsa-miR-331-3p	hsa-miR-196a-5p	hsa-miR-1307-3p	hsa-miR-219a-5p	hsa-miR-186-5p	hsa-miR-34a-5p	hsa-let-7a-5p	hsa-let-7b-5p	hsa-miR-181b-5p	hsa-miR-98-5p	hsa-miR-124-3p	hsa-miR-19b-3p	hsa-miR-192-5p	hsa-miR-155-5p	hsa-miR-335-5p	hsa-miR-103a-3p
hsa04130_SNARE_interactions_in_vesicular_transport	Pathways	hsa-miR-132-3p	hsa-miR-708-5p	hsa-miR-1229-3p	hsa-miR-18b-5p	hsa-miR-1-3p	hsa-miR-215-5p	hsa-miR-30a-5p	hsa-miR-100-5p	hsa-miR-455-3p	hsa-miR-30d-5p	hsa-miR-33a-5p	hsa-miR-16-5p	hsa-miR-18a-5p	hsa-miR-7-5p	hsa-miR-22-3p	hsa-miR-330-5p	hsa-miR-744-5p	hsa-miR-193b-3p	hsa-let-7e-5p	hsa-miR-26b-5p	hsa-miR-615-3p	hsa-miR-331-3p	hsa-miR-505-3p	hsa-miR-30b-5p	hsa-miR-92a-3p	hsa-miR-324-3p	hsa-miR-93-5p	hsa-miR-10a-5p	hsa-miR-34a-5p	hsa-miR-24-3p	hsa-miR-19b-3p	hsa-miR-1296-5p	hsa-let-7b-5p	hsa-miR-3200-3p	hsa-miR-98-5p	hsa-miR-373-3p	hsa-miR-122-5p	hsa-miR-124-3p	hsa-miR-106b-5p	hsa-miR-192-5p	hsa-miR-155-5p	hsa-miR-335-5p	hsa-miR-320a	hsa-miR-18a-3p	hsa-miR-375
WP2034_Leptin_signaling_pathway	Pathways	hsa-miR-125b-5p	hsa-miR-559	hsa-miR-210-3p	hsa-miR-19b-1-5p	hsa-miR-130b-3p	hsa-miR-96-5p	hsa-miR-218-5p	hsa-miR-877-3p	hsa-miR-33a-5p	hsa-miR-143-3p	hsa-miR-214-3p	hsa-miR-149-3p	hsa-miR-296-3p	hsa-miR-1914-3p	hsa-miR-373-3p	hsa-miR-26b-5p	hsa-miR-484	hsa-miR-615-3p	hsa-miR-497-5p	hsa-miR-196a-5p	hsa-miR-1229-3p	hsa-miR-92a-3p	hsa-miR-182-5p	hsa-miR-324-5p	hsa-miR-520b	hsa-miR-125a-5p	hsa-miR-338-3p	hsa-miR-766-3p	hsa-miR-181d-5p	hsa-miR-199a-3p	hsa-miR-144-3p	hsa-miR-98-5p	hsa-miR-320a	hsa-miR-92b-3p	hsa-miR-124-3p	hsa-miR-106b-5p	hsa-miR-199b-5p	hsa-miR-744-5p	hsa-miR-101-3p	hsa-miR-503-5p	hsa-miR-200c-3p	hsa-miR-18a-3p	hsa-miR-302c-3p	hsa-miR-491-5p	hsa-miR-130b-5p	hsa-miR-625-5p	hsa-miR-30a-5p	hsa-miR-326
P02739_De_novo_pyrimidine_deoxyribonucleotide_biosynthesis	Pathways	hsa-miR-125b-5p	hsa-let-7g-5p	hsa-miR-484	hsa-miR-197-3p	hsa-miR-1229-3p	hsa-miR-125a-5p	hsa-miR-1-3p	hsa-let-7a-5p	hsa-miR-30a-5p	hsa-miR-100-5p	hsa-let-7b-5p	hsa-miR-877-3p	hsa-miR-99a-5p	hsa-miR-7-5p	hsa-miR-155-5p	hsa-miR-193b-3p	hsa-miR-26b-5p	hsa-miR-26a-5p	hsa-miR-615-3p	hsa-miR-24-3p	hsa-miR-142-3p	hsa-miR-92a-3p	hsa-miR-342-3p	hsa-miR-324-5p	hsa-miR-34a-5p	hsa-miR-221-3p	hsa-miR-194-5p	hsa-miR-423-5p	hsa-miR-1226-3p	hsa-miR-450b-5p	hsa-let-7i-5p	hsa-miR-186-5p	hsa-miR-183-5p	hsa-miR-124-3p	hsa-miR-192-5p	hsa-miR-30c-5p	hsa-miR-3176	hsa-miR-27a-3p	hsa-miR-744-5p	hsa-miR-425-5p	hsa-miR-18a-3p	hsa-miR-375
hsa04930_Type_II_diabetes_mellitus	Pathways	hsa-miR-125b-5p	hsa-miR-125a-5p	hsa-miR-130b-3p	hsa-miR-96-5p	hsa-miR-218-5p	hsa-miR-877-3p	hsa-miR-33a-5p	hsa-miR-143-3p	hsa-miR-214-3p	hsa-miR-296-3p	hsa-miR-324-3p	hsa-miR-26b-5p	hsa-miR-484	hsa-miR-615-3p	hsa-miR-92a-3p	hsa-miR-342-3p	hsa-miR-140-3p	hsa-miR-766-3p	hsa-miR-423-5p	hsa-miR-199a-3p	hsa-miR-144-3p	hsa-miR-98-5p	hsa-let-7i-5p	hsa-miR-92b-3p	hsa-miR-106b-5p	hsa-miR-744-5p	hsa-miR-92a-1-5p	hsa-miR-200c-3p	hsa-miR-18a-3p	hsa-miR-223-3p	hsa-miR-328-3p	hsa-miR-30a-5p	hsa-miR-148a-3p	hsa-miR-15b-5p	hsa-miR-99a-5p	hsa-miR-7-5p	hsa-miR-1260b	hsa-miR-421	hsa-miR-1296-5p	hsa-miR-93-5p	hsa-miR-29a-3p	hsa-miR-326	hsa-miR-652-3p	hsa-miR-148b-3p	hsa-miR-483-5p	hsa-miR-221-3p	hsa-miR-194-5p	hsa-miR-19b-3p
WP129_Matrix_Metalloproteinases	Pathways	hsa-miR-132-3p	hsa-miR-125b-5p	hsa-miR-197-3p	hsa-miR-9-5p	hsa-miR-125a-5p	hsa-miR-18b-5p	hsa-miR-1-3p	hsa-miR-215-5p	hsa-miR-100-5p	hsa-miR-328-3p	hsa-miR-519c-3p	hsa-miR-31-5p	hsa-miR-143-3p	hsa-miR-222-3p	hsa-let-7e-5p	hsa-miR-26b-5p	hsa-miR-519d-3p	hsa-miR-92a-3p	hsa-miR-30c-2-3p	hsa-miR-21-5p	hsa-miR-29c-3p	hsa-miR-361-5p	hsa-miR-338-3p	hsa-miR-140-5p	hsa-miR-145-5p	hsa-miR-221-3p	hsa-miR-519a-3p	hsa-miR-17-5p	hsa-miR-146b-5p	hsa-miR-181c-3p	hsa-miR-181b-5p	hsa-miR-203a-3p	hsa-miR-29b-3p	hsa-miR-149-5p	hsa-miR-16-5p	hsa-miR-124-3p	hsa-miR-138-5p	hsa-miR-451a	hsa-miR-192-5p	hsa-miR-27a-3p	hsa-miR-423-5p	hsa-miR-335-5p	hsa-miR-126-3p	hsa-miR-27b-3p	hsa-miR-103a-3p	hsa-miR-126-5p
hsa00561_Glycerolipid_metabolism	Pathways	hsa-miR-132-3p	hsa-miR-9-5p	hsa-miR-125b-5p	hsa-miR-497-5p	hsa-miR-130b-5p	hsa-miR-149-5p	hsa-miR-1-3p	hsa-miR-215-5p	hsa-let-7a-5p	hsa-miR-877-5p	hsa-miR-100-5p	hsa-miR-328-3p	hsa-miR-30c-5p	hsa-miR-877-3p	hsa-miR-16-5p	hsa-miR-7-5p	hsa-miR-744-5p	hsa-miR-193b-3p	hsa-miR-26b-5p	hsa-miR-484	hsa-miR-615-3p	hsa-miR-331-3p	hsa-miR-940	hsa-miR-92a-3p	hsa-miR-106b-5p	hsa-miR-29a-3p	hsa-miR-342-5p	hsa-miR-21-5p	hsa-miR-1260b	hsa-miR-148b-3p	hsa-miR-34a-5p	hsa-miR-186-5p	hsa-miR-24-3p	hsa-miR-1226-3p	hsa-let-7b-5p	hsa-miR-181a-5p	hsa-miR-98-5p	hsa-miR-769-5p	hsa-miR-128-3p	hsa-miR-378a-3p	hsa-miR-124-3p	hsa-miR-138-5p	hsa-miR-183-5p	hsa-miR-192-5p	hsa-miR-30a-5p	hsa-miR-27a-3p	hsa-miR-155-5p	hsa-miR-101-3p
P02754_Methylcitrate_cycle	Pathways	hsa-miR-9-5p	hsa-miR-21-5p	hsa-miR-615-3p
P02756_N_acetylglucosamine_metabolism	Pathways	hsa-miR-590-3p	hsa-miR-128-3p	hsa-miR-32-5p	hsa-miR-124-3p	hsa-miR-106b-5p	hsa-miR-26b-5p	hsa-miR-149-5p	hsa-miR-34a-5p	hsa-miR-1-3p	hsa-miR-101-3p	hsa-miR-30b-5p	hsa-miR-335-5p	hsa-miR-122-5p	hsa-miR-16-5p
hsa00604_Glycosphingolipid_biosynthesis___ganglio_series	Pathways	hsa-miR-7-5p	hsa-miR-186-5p	hsa-miR-148b-3p	hsa-miR-26b-5p	hsa-miR-484	hsa-miR-204-5p	hsa-let-7f-5p	hsa-miR-155-5p	hsa-miR-30a-5p	hsa-miR-615-3p	hsa-miR-324-3p	hsa-let-7b-5p	hsa-miR-122-5p	hsa-miR-760	hsa-miR-335-5p
P02737_Cysteine_biosynthesis	Pathways	hsa-miR-652-3p	hsa-miR-193b-3p	hsa-miR-149-5p	hsa-miR-615-3p	hsa-miR-106b-3p	hsa-miR-92a-3p	hsa-miR-324-5p
hsa00670_One_carbon_pool_by_folate	Pathways	hsa-miR-125b-5p	hsa-miR-1180-3p	hsa-miR-887-3p	hsa-miR-1-3p	hsa-miR-877-5p	hsa-miR-96-5p	hsa-miR-615-3p	hsa-miR-30d-5p	hsa-miR-16-5p	hsa-miR-15b-5p	hsa-miR-99a-5p	hsa-miR-24-3p	hsa-miR-155-5p	hsa-miR-193b-3p	hsa-miR-26b-5p	hsa-miR-484	hsa-miR-935	hsa-miR-93-3p	hsa-miR-92a-3p	hsa-miR-342-3p	hsa-miR-324-5p	hsa-miR-29c-3p	hsa-miR-503-5p	hsa-miR-10a-5p	hsa-miR-34a-5p	hsa-miR-186-5p	hsa-miR-194-5p	hsa-miR-30e-5p	hsa-let-7a-5p	hsa-let-7b-5p	hsa-miR-940	hsa-miR-423-3p	hsa-miR-769-5p	hsa-miR-17-3p	hsa-miR-124-3p	hsa-miR-106b-5p	hsa-miR-744-5p	hsa-miR-99b-5p	hsa-miR-335-5p	hsa-miR-320a	hsa-miR-18a-3p	hsa-miR-421	hsa-miR-103a-3p
hsa00010_Glycolysis__Gluconeogenesis	Pathways	hsa-miR-125b-5p	hsa-miR-186-3p	hsa-miR-125a-5p	hsa-miR-1226-3p	hsa-miR-96-5p	hsa-miR-877-3p	hsa-miR-33a-5p	hsa-miR-143-3p	hsa-miR-296-3p	hsa-miR-22-3p	hsa-miR-760	hsa-miR-484	hsa-miR-615-3p	hsa-miR-196a-5p	hsa-miR-1180-3p	hsa-miR-92a-3p	hsa-miR-324-5p	hsa-miR-520b	hsa-miR-520e	hsa-miR-501-5p	hsa-miR-766-3p	hsa-miR-423-5p	hsa-miR-181d-5p	hsa-miR-324-3p	hsa-miR-98-5p	hsa-miR-92b-3p	hsa-miR-124-3p	hsa-miR-106b-5p	hsa-miR-644a	hsa-miR-744-5p	hsa-miR-18a-3p	hsa-miR-10b-5p	hsa-miR-520a-3p	hsa-miR-3177-3p	hsa-miR-130b-5p	hsa-miR-30c-5p	hsa-miR-30a-5p	hsa-miR-455-3p	hsa-miR-99a-5p	hsa-miR-7-5p	hsa-miR-340-3p	hsa-miR-1260b	hsa-miR-15a-5p	hsa-miR-1296-5p	hsa-miR-93-5p	hsa-miR-326	hsa-miR-148b-3p	hsa-miR-221-3p
WP254_Apoptosis	Pathways	hsa-miR-125b-5p	hsa-miR-210-3p	hsa-miR-150-5p	hsa-miR-125a-5p	hsa-miR-193a-5p	hsa-miR-1226-3p	hsa-miR-96-5p	hsa-miR-218-5p	hsa-miR-877-3p	hsa-miR-143-3p	hsa-miR-214-3p	hsa-miR-149-3p	hsa-miR-296-3p	hsa-miR-34c-5p	hsa-miR-22-3p	hsa-miR-26b-5p	hsa-miR-484	hsa-miR-204-5p	hsa-miR-497-5p	hsa-miR-196a-5p	hsa-miR-92a-3p	hsa-miR-342-3p	hsa-miR-182-5p	hsa-miR-324-5p	hsa-miR-320b	hsa-miR-373-3p	hsa-miR-24-2-5p	hsa-miR-615-3p	hsa-miR-148b-5p	hsa-miR-483-3p	hsa-miR-423-5p	hsa-miR-181d-5p	hsa-miR-30d-5p	hsa-miR-98-5p	hsa-miR-892b	hsa-miR-32-5p	hsa-miR-124-3p	hsa-miR-106b-5p	hsa-miR-181c-5p	hsa-miR-744-5p	hsa-miR-101-3p	hsa-miR-151a-3p	hsa-miR-34b-3p	hsa-miR-200c-3p	hsa-miR-18a-3p	hsa-miR-193a-3p	hsa-miR-19b-1-5p	hsa-miR-582-5p
P00047_PDGF_signaling_pathway	Pathways	hsa-miR-125b-5p	hsa-miR-199a-3p	hsa-miR-125a-5p	hsa-miR-130b-3p	hsa-miR-96-5p	hsa-miR-877-3p	hsa-miR-33a-5p	hsa-miR-143-3p	hsa-miR-214-3p	hsa-miR-296-3p	hsa-miR-34c-5p	hsa-miR-22-3p	hsa-miR-26b-5p	hsa-miR-484	hsa-miR-615-3p	hsa-miR-497-5p	hsa-miR-196a-5p	hsa-miR-1229-3p	hsa-miR-92a-3p	hsa-miR-342-3p	hsa-miR-182-5p	hsa-miR-324-5p	hsa-miR-320b	hsa-miR-24-2-5p	hsa-miR-1292-5p	hsa-miR-766-3p	hsa-miR-423-5p	hsa-miR-181d-5p	hsa-miR-1296-5p	hsa-miR-98-5p	hsa-miR-92b-3p	hsa-miR-32-5p	hsa-miR-124-3p	hsa-miR-106b-5p	hsa-miR-181c-5p	hsa-miR-744-5p	hsa-miR-101-3p	hsa-miR-503-5p	hsa-miR-200c-3p	hsa-miR-18a-3p	hsa-miR-520b	hsa-miR-139-5p	hsa-miR-30c-5p	hsa-miR-30a-5p	hsa-miR-148a-3p	hsa-miR-15b-5p	hsa-miR-99a-5p	hsa-miR-5787
hsa05221_Acute_myeloid_leukemia	Pathways	hsa-miR-125b-5p	hsa-miR-210-3p	hsa-miR-150-5p	hsa-miR-19b-1-5p	hsa-miR-193a-5p	hsa-miR-1226-3p	hsa-miR-96-5p	hsa-miR-218-5p	hsa-miR-877-3p	hsa-miR-33a-5p	hsa-miR-143-3p	hsa-miR-149-3p	hsa-miR-296-3p	hsa-miR-34c-5p	hsa-miR-373-3p	hsa-miR-324-3p	hsa-miR-26b-5p	hsa-miR-615-3p	hsa-miR-497-5p	hsa-miR-196a-5p	hsa-miR-1229-3p	hsa-miR-92a-3p	hsa-miR-324-5p	hsa-miR-520b	hsa-miR-125a-5p	hsa-miR-338-3p	hsa-miR-766-3p	hsa-miR-423-5p	hsa-miR-181d-5p	hsa-miR-199a-3p	hsa-miR-144-3p	hsa-miR-98-5p	hsa-miR-320a	hsa-miR-92b-3p	hsa-miR-124-3p	hsa-miR-106b-5p	hsa-miR-181c-5p	hsa-miR-744-5p	hsa-miR-101-3p	hsa-miR-503-5p	hsa-miR-200c-3p	hsa-miR-18a-3p	hsa-miR-302c-3p	hsa-miR-30a-5p	hsa-miR-15b-5p	hsa-miR-99a-5p	hsa-miR-7-5p	hsa-miR-26a-5p
WP528_Acetylcholine_Synthesis	Pathways	hsa-miR-21-5p	hsa-miR-26a-5p	hsa-miR-326	hsa-miR-22-3p	hsa-miR-124-3p	hsa-miR-26b-5p	hsa-miR-130b-5p	hsa-miR-30b-5p	hsa-miR-335-5p	hsa-miR-191-5p	hsa-miR-877-3p	hsa-let-7b-5p
WP69_TCR_Signaling_Pathway	Pathways	hsa-miR-125b-5p	hsa-miR-210-3p	hsa-miR-125a-5p	hsa-miR-96-5p	hsa-miR-218-5p	hsa-miR-877-3p	hsa-miR-33a-5p	hsa-miR-143-3p	hsa-miR-214-3p	hsa-miR-149-3p	hsa-miR-296-3p	hsa-miR-1914-3p	hsa-miR-373-3p	hsa-miR-26b-5p	hsa-miR-484	hsa-miR-615-3p	hsa-miR-497-5p	hsa-miR-92a-3p	hsa-miR-342-3p	hsa-miR-182-5p	hsa-miR-324-5p	hsa-miR-320b	hsa-miR-140-3p	hsa-miR-766-3p	hsa-miR-423-5p	hsa-miR-181d-5p	hsa-miR-199a-3p	hsa-miR-98-5p	hsa-miR-92b-3p	hsa-miR-32-5p	hsa-miR-124-3p	hsa-miR-106b-5p	hsa-miR-129-1-3p	hsa-miR-744-5p	hsa-miR-101-3p	hsa-miR-151a-3p	hsa-miR-200c-3p	hsa-miR-302c-3p	hsa-miR-130b-5p	hsa-miR-30a-5p	hsa-miR-30e-3p	hsa-miR-15b-5p	hsa-miR-3605-3p	hsa-miR-24-3p	hsa-miR-146b-5p	hsa-miR-1260b	hsa-miR-26a-5p	hsa-miR-15a-5p
WP3_Keap1_Nrf2	Pathways	hsa-miR-24-2-5p	hsa-miR-1-3p	hsa-miR-877-5p	hsa-miR-33a-5p	hsa-miR-16-5p	hsa-miR-153-3p	hsa-miR-10a-5p	hsa-miR-24-3p	hsa-miR-365a-3p	hsa-miR-744-5p	hsa-miR-193b-3p	hsa-miR-26b-5p	hsa-miR-15a-5p	hsa-miR-505-3p	hsa-miR-214-3p	hsa-miR-142-5p	hsa-miR-196a-5p	hsa-miR-140-3p	hsa-miR-92a-3p	hsa-miR-122-5p	hsa-miR-7-5p	hsa-miR-148b-3p	hsa-miR-125a-5p	hsa-miR-34a-5p	hsa-miR-421	hsa-miR-423-5p	hsa-miR-17-5p	hsa-miR-144-3p	hsa-miR-92b-3p	hsa-miR-128-3p	hsa-miR-17-3p	hsa-miR-200a-3p	hsa-miR-124-3p	hsa-miR-106b-3p	hsa-miR-27a-3p	hsa-miR-155-5p	hsa-miR-335-5p	hsa-miR-375
hsa04270_Vascular_smooth_muscle_contraction	Pathways	hsa-miR-125b-5p	hsa-miR-199a-3p	hsa-miR-24-2-5p	hsa-miR-96-5p	hsa-miR-877-3p	hsa-miR-22-3p	hsa-miR-26b-5p	hsa-miR-484	hsa-miR-615-3p	hsa-miR-497-5p	hsa-miR-92a-3p	hsa-miR-342-3p	hsa-miR-182-5p	hsa-miR-324-5p	hsa-miR-338-3p	hsa-miR-766-3p	hsa-miR-423-5p	hsa-miR-1296-5p	hsa-miR-98-5p	hsa-miR-92b-3p	hsa-miR-32-5p	hsa-miR-124-3p	hsa-miR-106b-5p	hsa-miR-802	hsa-miR-744-5p	hsa-miR-101-3p	hsa-miR-200c-3p	hsa-miR-18a-3p	hsa-miR-877-5p	hsa-miR-15b-5p	hsa-miR-99a-5p	hsa-miR-7-5p	hsa-miR-26a-5p	hsa-miR-15a-5p	hsa-miR-324-3p	hsa-miR-93-5p	hsa-miR-148b-3p	hsa-miR-483-5p	hsa-miR-221-3p	hsa-miR-19b-3p	hsa-miR-146b-5p	hsa-miR-584-5p	hsa-miR-940	hsa-miR-769-5p	hsa-miR-23b-3p	hsa-miR-133a-3p	hsa-miR-423-3p	hsa-miR-449c-5p
hsa01040_Biosynthesis_of_unsaturated_fatty_acids	Pathways	hsa-miR-26a-5p	hsa-miR-197-3p	hsa-miR-7-5p	hsa-miR-1229-3p	hsa-miR-221-3p	hsa-miR-149-5p	hsa-miR-1-3p	hsa-miR-215-5p	hsa-miR-30c-5p	hsa-miR-30a-5p	hsa-miR-455-3p	hsa-miR-328-3p	hsa-miR-877-3p	hsa-miR-191-5p	hsa-let-7e-5p	hsa-miR-24-3p	hsa-miR-185-5p	hsa-miR-744-5p	hsa-miR-193b-3p	hsa-miR-16-5p	hsa-miR-26b-5p	hsa-miR-484	hsa-miR-615-3p	hsa-miR-331-3p	hsa-miR-30b-5p	hsa-miR-140-3p	hsa-miR-92a-3p	hsa-miR-324-3p	hsa-miR-93-5p	hsa-miR-324-5p	hsa-miR-21-5p	hsa-miR-211-5p	hsa-miR-874-3p	hsa-miR-652-3p	hsa-miR-10a-5p	hsa-miR-125a-5p	hsa-miR-361-5p	hsa-miR-19b-3p	hsa-miR-421	hsa-miR-92b-5p	hsa-miR-17-5p	hsa-let-7b-5p	hsa-miR-181a-5p	hsa-miR-500a-3p	hsa-miR-98-5p	hsa-miR-17-3p	hsa-miR-423-3p	hsa-miR-124-3p
P02753_Methionine_biosynthesis	Pathways	hsa-miR-106b-5p	hsa-miR-10a-5p	hsa-miR-193b-3p	hsa-miR-484
WP143_Fatty_Acid_Beta_Oxidation	Pathways	hsa-miR-132-3p	hsa-miR-197-3p	hsa-miR-1229-3p	hsa-miR-152-3p	hsa-miR-125a-5p	hsa-miR-1-3p	hsa-miR-215-5p	hsa-miR-31-3p	hsa-miR-30a-5p	hsa-miR-100-5p	hsa-miR-10b-5p	hsa-miR-877-3p	hsa-miR-191-5p	hsa-miR-16-5p	hsa-miR-15b-5p	hsa-miR-99a-5p	hsa-miR-195-5p	hsa-miR-193b-3p	hsa-miR-26b-5p	hsa-miR-484	hsa-miR-15a-5p	hsa-miR-615-3p	hsa-miR-331-3p	hsa-miR-93-3p	hsa-miR-10a-5p	hsa-miR-92a-3p	hsa-miR-29a-3p	hsa-miR-221-3p	hsa-miR-21-5p	hsa-miR-320b	hsa-miR-340-5p	hsa-miR-148b-3p	hsa-miR-34a-5p	hsa-miR-186-5p	hsa-miR-877-5p	hsa-let-7b-5p	hsa-miR-98-5p	hsa-miR-23b-3p	hsa-miR-128-3p	hsa-miR-378a-3p	hsa-miR-124-3p	hsa-miR-138-5p	hsa-miR-192-5p	hsa-miR-20a-5p	hsa-miR-155-5p	hsa-miR-151a-3p	hsa-miR-335-5p	hsa-miR-320a
hsa04320_Dorso_ventral_axis_formation	Pathways	hsa-miR-125b-5p	hsa-miR-150-5p	hsa-miR-96-5p	hsa-miR-218-5p	hsa-miR-143-3p	hsa-miR-296-3p	hsa-miR-34c-5p	hsa-miR-484	hsa-miR-196a-5p	hsa-miR-92a-3p	hsa-miR-766-3p	hsa-miR-199a-3p	hsa-miR-144-3p	hsa-miR-92b-3p	hsa-miR-124-3p	hsa-miR-181c-5p	hsa-miR-744-5p	hsa-miR-101-3p	hsa-miR-18a-3p	hsa-miR-130b-5p	hsa-miR-542-5p	hsa-miR-30c-5p	hsa-miR-30a-5p	hsa-miR-151a-5p	hsa-miR-15b-5p	hsa-miR-99a-5p	hsa-miR-129-5p	hsa-miR-7-5p	hsa-miR-622	hsa-miR-93-5p	hsa-miR-326	hsa-miR-483-5p	hsa-miR-433-3p	hsa-miR-769-5p	hsa-miR-23b-3p	hsa-miR-133a-3p	hsa-miR-423-3p	hsa-miR-320b	hsa-miR-320a	hsa-miR-27b-3p	hsa-miR-18a-5p	hsa-let-7g-5p	hsa-miR-28-5p	hsa-miR-497-5p	hsa-miR-10b-5p	hsa-miR-146a-5p	hsa-miR-25-3p	hsa-miR-31-5p
WP698_Glucuronidation	Pathways	hsa-miR-9-5p	hsa-miR-125a-5p	hsa-miR-1-3p	hsa-miR-215-5p	hsa-miR-30a-5p	hsa-miR-455-3p	hsa-miR-10b-5p	hsa-miR-16-5p	hsa-miR-24-3p	hsa-miR-193b-3p	hsa-miR-26b-5p	hsa-miR-15a-5p	hsa-miR-615-3p	hsa-miR-30b-5p	hsa-miR-142-3p	hsa-miR-92a-3p	hsa-miR-1296-5p	hsa-miR-93-5p	hsa-miR-10a-5p	hsa-let-7b-5p	hsa-miR-23b-3p	hsa-miR-32-5p	hsa-miR-124-3p	hsa-miR-106b-5p	hsa-miR-192-5p	hsa-miR-155-5p	hsa-miR-99b-5p	hsa-miR-335-5p	hsa-miR-375
WP411_mRNA_processing	Pathways	hsa-miR-125b-5p	hsa-miR-10a-3p	hsa-miR-210-3p	hsa-miR-125a-5p	hsa-miR-130b-3p	hsa-miR-96-5p	hsa-miR-218-5p	hsa-miR-877-3p	hsa-miR-18a-5p	hsa-miR-296-3p	hsa-miR-34c-5p	hsa-miR-22-3p	hsa-miR-26b-5p	hsa-miR-484	hsa-miR-615-3p	hsa-miR-196a-5p	hsa-miR-1229-3p	hsa-miR-92a-3p	hsa-miR-342-3p	hsa-miR-182-5p	hsa-miR-324-5p	hsa-miR-30b-3p	hsa-miR-339-5p	hsa-miR-532-3p	hsa-miR-1292-5p	hsa-miR-421	hsa-miR-423-5p	hsa-miR-324-3p	hsa-miR-30d-5p	hsa-miR-98-5p	hsa-miR-92b-3p	hsa-miR-32-5p	hsa-miR-124-3p	hsa-miR-106b-5p	hsa-miR-154-5p	hsa-miR-744-5p	hsa-miR-374a-5p	hsa-miR-503-5p	hsa-miR-18a-3p	hsa-miR-193a-3p	hsa-miR-10b-5p	hsa-miR-3679-3p	hsa-miR-130b-5p	hsa-miR-542-5p	hsa-miR-30c-5p	hsa-miR-30a-5p	hsa-miR-455-3p	hsa-miR-326
WP197_Cholesterol_Biosynthesis	Pathways	hsa-miR-18a-5p	hsa-miR-125b-5p	hsa-miR-149-5p	hsa-miR-215-5p	hsa-miR-30a-5p	hsa-miR-96-5p	hsa-miR-10b-5p	hsa-let-7e-5p	hsa-miR-15b-5p	hsa-miR-193b-3p	hsa-miR-1260b	hsa-miR-1301-3p	hsa-miR-615-3p	hsa-miR-19a-3p	hsa-miR-93-3p	hsa-miR-92a-3p	hsa-miR-30c-2-3p	hsa-miR-29c-3p	hsa-miR-10a-5p	hsa-miR-34a-5p	hsa-miR-186-5p	hsa-miR-19b-3p	hsa-let-7b-5p	hsa-miR-769-3p	hsa-miR-26b-5p	hsa-miR-32-5p	hsa-miR-124-3p	hsa-miR-192-5p	hsa-miR-3176	hsa-miR-155-5p	hsa-miR-335-5p	hsa-miR-425-5p	hsa-miR-760
P05918_p38_MAPK_pathway	Pathways	hsa-miR-124-3p	hsa-miR-26b-5p	hsa-miR-186-5p	hsa-miR-92a-3p	hsa-miR-93-5p	hsa-miR-148a-3p
P02748_Isoleucine_biosynthesis	Pathways	hsa-miR-769-5p	hsa-miR-125b-5p	hsa-miR-21-5p	hsa-miR-32-5p	hsa-miR-23b-3p	hsa-miR-193b-3p	hsa-miR-484	hsa-miR-615-3p	hsa-miR-1-3p	hsa-miR-155-5p	hsa-let-7a-5p	hsa-let-7b-5p
WP205_IL_7_signaling_pathway	Pathways	hsa-miR-125b-5p	hsa-miR-19b-1-5p	hsa-miR-218-5p	hsa-miR-877-3p	hsa-miR-143-3p	hsa-miR-149-3p	hsa-miR-296-3p	hsa-miR-34c-5p	hsa-miR-26b-5p	hsa-miR-484	hsa-miR-615-3p	hsa-miR-497-5p	hsa-miR-196a-5p	hsa-miR-1229-3p	hsa-miR-92a-3p	hsa-miR-520b	hsa-miR-338-3p	hsa-miR-766-3p	hsa-miR-423-5p	hsa-miR-190a-5p	hsa-miR-199a-3p	hsa-miR-98-5p	hsa-miR-92b-3p	hsa-miR-124-3p	hsa-miR-106b-5p	hsa-miR-744-5p	hsa-miR-101-3p	hsa-miR-503-5p	hsa-miR-302c-3p	hsa-miR-491-5p	hsa-miR-30a-5p	hsa-miR-15b-5p	hsa-miR-24-3p	hsa-miR-1260b	hsa-miR-26a-5p	hsa-miR-15a-5p	hsa-miR-429	hsa-miR-296-5p	hsa-miR-324-3p	hsa-miR-93-5p	hsa-miR-29a-3p	hsa-miR-483-5p	hsa-miR-221-3p	hsa-miR-337-3p	hsa-miR-222-3p	hsa-miR-769-5p	hsa-miR-23b-3p	hsa-miR-133a-3p
WP2035_FSH_signaling_pathway	Pathways	hsa-miR-125b-5p	hsa-miR-210-3p	hsa-miR-125a-5p	hsa-miR-96-5p	hsa-miR-877-3p	hsa-miR-33a-5p	hsa-miR-143-3p	hsa-miR-149-3p	hsa-miR-296-3p	hsa-miR-22-3p	hsa-miR-324-3p	hsa-miR-26b-5p	hsa-miR-196a-5p	hsa-miR-92a-3p	hsa-miR-182-5p	hsa-miR-24-2-5p	hsa-miR-766-3p	hsa-miR-199a-3p	hsa-miR-144-3p	hsa-miR-98-5p	hsa-miR-92b-3p	hsa-miR-32-5p	hsa-miR-124-3p	hsa-miR-744-5p	hsa-miR-18a-3p	hsa-miR-302c-3p	hsa-miR-30a-5p	hsa-miR-15b-5p	hsa-miR-99a-5p	hsa-miR-24-3p	hsa-miR-1260b	hsa-miR-15a-5p	hsa-miR-421	hsa-miR-1296-5p	hsa-miR-335-5p	hsa-miR-326	hsa-miR-652-3p	hsa-miR-483-5p	hsa-miR-34a-5p	hsa-miR-769-5p	hsa-miR-23b-3p	hsa-miR-423-3p	hsa-miR-200a-3p	hsa-miR-34b-5p	hsa-miR-320b	hsa-miR-320a	hsa-miR-132-3p	hsa-miR-203a-3p
WP692_Sulfation_Biotransformation_Reaction	Pathways	hsa-miR-18a-5p	hsa-miR-7-5p	hsa-miR-92b-3p	hsa-miR-124-3p	hsa-miR-26b-5p	hsa-miR-631	hsa-miR-1-3p	hsa-miR-744-5p	hsa-miR-24-3p	hsa-miR-335-5p	hsa-let-7b-5p	hsa-miR-18a-3p	hsa-miR-100-5p	hsa-miR-183-5p	hsa-miR-199a-5p
P00018_EGF_receptor_signaling_pathway	Pathways	hsa-miR-125b-5p	hsa-miR-559	hsa-miR-146b-5p	hsa-miR-125a-5p	hsa-miR-15a-5p	hsa-miR-96-5p	hsa-miR-877-3p	hsa-miR-33a-5p	hsa-miR-15a-3p	hsa-miR-143-3p	hsa-miR-214-3p	hsa-miR-149-3p	hsa-miR-1914-3p	hsa-miR-22-3p	hsa-miR-324-3p	hsa-miR-26b-5p	hsa-miR-484	hsa-miR-615-3p	hsa-miR-1229-3p	hsa-miR-92a-3p	hsa-miR-342-3p	hsa-miR-182-5p	hsa-miR-324-5p	hsa-miR-520b	hsa-miR-24-2-5p	hsa-miR-766-3p	hsa-miR-505-5p	hsa-miR-423-5p	hsa-miR-181d-5p	hsa-miR-199a-3p	hsa-miR-19b-3p	hsa-miR-98-5p	hsa-let-7i-5p	hsa-miR-92b-3p	hsa-miR-32-5p	hsa-miR-124-3p	hsa-miR-106b-5p	hsa-miR-181c-5p	hsa-miR-199b-5p	hsa-miR-744-5p	hsa-miR-372-3p	hsa-miR-200c-3p	hsa-miR-18a-3p	hsa-miR-328-3p	hsa-miR-302c-3p	hsa-miR-542-5p	hsa-miR-30a-3p	hsa-miR-30a-5p
hsa00680_Methane_metabolism	Pathways	hsa-miR-125b-5p	hsa-miR-186-5p	hsa-miR-193b-3p	hsa-miR-423-3p	hsa-miR-124-3p	hsa-miR-106b-5p	hsa-miR-632	hsa-miR-92a-3p	hsa-miR-615-3p	hsa-miR-155-5p	hsa-miR-30a-5p	hsa-miR-30b-5p	hsa-miR-940	hsa-miR-320a	hsa-let-7a-5p	hsa-miR-181b-5p	hsa-miR-16-5p	hsa-miR-103a-3p
WP53_Id_Signaling_Pathway	Pathways	hsa-miR-132-3p	hsa-miR-125b-5p	hsa-miR-675-5p	hsa-miR-484	hsa-miR-9-5p	hsa-miR-376a-3p	hsa-miR-210-3p	hsa-miR-149-5p	hsa-miR-302d-3p	hsa-miR-215-5p	hsa-miR-130b-3p	hsa-miR-151a-3p	hsa-miR-10b-5p	hsa-miR-25-3p	hsa-miR-16-5p	hsa-miR-15b-5p	hsa-miR-99a-5p	hsa-miR-185-5p	hsa-miR-195-5p	hsa-miR-744-5p	hsa-miR-193b-3p	hsa-let-7e-5p	hsa-miR-26b-5p	hsa-miR-26a-5p	hsa-miR-15a-5p	hsa-miR-885-5p	hsa-miR-93-3p	hsa-miR-92a-3p	hsa-miR-93-5p	hsa-miR-342-5p	hsa-miR-21-5p	hsa-miR-424-5p	hsa-miR-10a-5p	hsa-miR-520h	hsa-miR-361-5p	hsa-miR-186-5p	hsa-miR-423-5p	hsa-miR-17-5p	hsa-let-7b-5p	hsa-miR-23b-3p	hsa-miR-378a-3p	hsa-miR-124-3p	hsa-miR-106b-5p	hsa-miR-192-5p	hsa-miR-20a-5p	hsa-miR-106a-5p	hsa-miR-155-5p	hsa-miR-100-5p
hsa05216_Thyroid_cancer	Pathways	hsa-miR-125b-5p	hsa-miR-150-5p	hsa-miR-19b-1-5p	hsa-miR-1226-3p	hsa-miR-96-5p	hsa-miR-877-3p	hsa-miR-143-3p	hsa-miR-214-3p	hsa-miR-34c-5p	hsa-miR-331-5p	hsa-miR-26b-5p	hsa-miR-484	hsa-miR-615-3p	hsa-miR-196a-5p	hsa-miR-1180-3p	hsa-miR-92a-3p	hsa-miR-342-3p	hsa-miR-324-5p	hsa-miR-520b	hsa-miR-125a-5p	hsa-miR-532-3p	hsa-miR-766-3p	hsa-miR-423-5p	hsa-miR-181d-5p	hsa-miR-199a-3p	hsa-miR-30d-5p	hsa-miR-98-5p	hsa-miR-92b-3p	hsa-miR-124-3p	hsa-miR-106b-5p	hsa-miR-181c-5p	hsa-miR-744-5p	hsa-miR-101-3p	hsa-miR-503-5p	hsa-miR-200c-3p	hsa-miR-18a-3p	hsa-miR-302c-3p	hsa-miR-25-3p	hsa-miR-30a-5p	hsa-miR-1285-3p	hsa-miR-15b-5p	hsa-miR-99a-5p	hsa-miR-24-3p	hsa-miR-26a-5p	hsa-miR-15a-5p	hsa-miR-429	hsa-miR-622	hsa-miR-296-5p
WP167_Eicosanoid_Synthesis	Pathways	hsa-miR-132-3p	hsa-miR-125b-5p	hsa-miR-484	hsa-miR-99b-3p	hsa-miR-708-5p	hsa-miR-1908-5p	hsa-miR-149-5p	hsa-miR-196b-5p	hsa-miR-137	hsa-miR-16-5p	hsa-miR-99a-5p	hsa-miR-296-3p	hsa-miR-146b-5p	hsa-miR-3934-5p	hsa-miR-155-5p	hsa-miR-193b-3p	hsa-let-7e-5p	hsa-miR-26b-5p	hsa-miR-26a-5p	hsa-miR-1301-3p	hsa-miR-615-3p	hsa-miR-196a-5p	hsa-miR-92a-3p	hsa-miR-550a-5p	hsa-miR-199a-5p	hsa-miR-652-3p	hsa-miR-361-5p	hsa-miR-766-3p	hsa-miR-186-5p	hsa-miR-423-5p	hsa-miR-17-5p	hsa-let-7a-5p	hsa-let-7b-5p	hsa-miR-181a-5p	hsa-miR-378a-5p	hsa-miR-23b-3p	hsa-miR-128-3p	hsa-miR-92b-3p	hsa-miR-32-5p	hsa-miR-124-3p	hsa-let-7c-5p	hsa-miR-744-5p	hsa-miR-101-3p	hsa-miR-100-5p	hsa-miR-320c	hsa-miR-335-5p	hsa-miR-320a	hsa-miR-28-3p
WP15_selenium	Pathways	hsa-miR-125b-5p	hsa-miR-3934-5p	hsa-miR-210-3p	hsa-miR-125a-5p	hsa-miR-130b-3p	hsa-miR-96-5p	hsa-miR-877-3p	hsa-miR-33a-5p	hsa-miR-143-3p	hsa-miR-18a-5p	hsa-miR-296-3p	hsa-miR-373-3p	hsa-miR-26b-5p	hsa-miR-484	hsa-miR-204-5p	hsa-miR-196a-5p	hsa-miR-92a-3p	hsa-miR-342-3p	hsa-miR-324-5p	hsa-miR-409-3p	hsa-miR-766-3p	hsa-miR-423-5p	hsa-miR-98-5p	hsa-miR-92b-3p	hsa-miR-124-3p	hsa-miR-106b-5p	hsa-miR-744-5p	hsa-miR-101-3p	hsa-miR-18a-3p	hsa-miR-1256	hsa-miR-30a-5p	hsa-miR-15b-5p	hsa-miR-99a-5p	hsa-miR-7-5p	hsa-miR-3619-5p	hsa-miR-146b-5p	hsa-miR-26a-5p	hsa-miR-15a-5p	hsa-miR-93-5p	hsa-miR-137	hsa-miR-652-3p	hsa-miR-221-3p	hsa-miR-34a-5p	hsa-miR-146a-5p	hsa-miR-29b-3p	hsa-miR-769-5p	hsa-miR-23b-3p	hsa-miR-423-3p
WP364_IL_6_signaling_pathway	Pathways	hsa-miR-125b-5p	hsa-let-7a-5p	hsa-miR-218-5p	hsa-miR-877-3p	hsa-miR-143-3p	hsa-miR-149-3p	hsa-miR-296-3p	hsa-miR-26b-5p	hsa-miR-484	hsa-miR-615-3p	hsa-miR-497-5p	hsa-miR-196a-5p	hsa-miR-92a-3p	hsa-miR-766-3p	hsa-miR-199a-3p	hsa-miR-30d-5p	hsa-miR-98-5p	hsa-miR-92b-3p	hsa-miR-124-3p	hsa-miR-106b-5p	hsa-miR-181c-5p	hsa-miR-101-3p	hsa-miR-200c-3p	hsa-miR-302c-3p	hsa-miR-491-5p	hsa-miR-130b-5p	hsa-miR-383-5p	hsa-miR-30a-5p	hsa-miR-15b-5p	hsa-miR-7-5p	hsa-miR-26a-5p	hsa-miR-429	hsa-miR-324-3p	hsa-miR-93-5p	hsa-miR-29a-3p	hsa-miR-652-3p	hsa-miR-483-5p	hsa-miR-194-5p	hsa-miR-337-3p	hsa-miR-663a	hsa-miR-433-3p	hsa-miR-769-5p	hsa-miR-23b-3p	hsa-miR-133a-3p	hsa-miR-423-3p	hsa-miR-200a-3p	hsa-miR-519a-3p	hsa-miR-320b
P00006_Apoptosis_signaling_pathway	Pathways	hsa-miR-125b-5p	hsa-miR-210-3p	hsa-miR-150-5p	hsa-miR-199a-3p	hsa-miR-24-2-5p	hsa-miR-1226-3p	hsa-miR-96-5p	hsa-miR-141-3p	hsa-miR-218-5p	hsa-miR-877-3p	hsa-miR-33a-5p	hsa-miR-143-3p	hsa-miR-214-3p	hsa-miR-149-3p	hsa-miR-296-3p	hsa-miR-34c-5p	hsa-miR-22-3p	hsa-miR-26b-5p	hsa-miR-484	hsa-miR-204-5p	hsa-miR-196a-5p	hsa-miR-92a-3p	hsa-miR-342-3p	hsa-miR-182-5p	hsa-miR-324-5p	hsa-miR-19a-3p	hsa-miR-320b	hsa-miR-373-3p	hsa-miR-125a-5p	hsa-miR-615-3p	hsa-miR-148b-5p	hsa-miR-766-3p	hsa-miR-423-5p	hsa-miR-181d-5p	hsa-miR-324-3p	hsa-miR-30d-5p	hsa-miR-98-5p	hsa-miR-892b	hsa-miR-657	hsa-miR-92b-3p	hsa-miR-32-5p	hsa-miR-124-3p	hsa-miR-106b-5p	hsa-miR-181c-5p	hsa-miR-744-5p	hsa-miR-101-3p	hsa-miR-151a-3p	hsa-miR-503-5p
P00027_Heterotrimeric_G_protein_signaling_pathway_Gq_alpha_and_Go_alpha_mediated_pathway	Pathways	hsa-miR-125b-5p	hsa-miR-24-2-5p	hsa-miR-96-5p	hsa-miR-877-3p	hsa-miR-296-3p	hsa-miR-22-3p	hsa-miR-99a-3p	hsa-miR-26b-5p	hsa-miR-484	hsa-miR-615-3p	hsa-miR-92a-3p	hsa-miR-342-3p	hsa-miR-324-5p	hsa-miR-421	hsa-miR-423-5p	hsa-miR-98-5p	hsa-miR-92b-3p	hsa-miR-32-5p	hsa-miR-124-3p	hsa-miR-106b-5p	hsa-miR-744-5p	hsa-miR-101-3p	hsa-miR-503-5p	hsa-miR-200c-3p	hsa-miR-518b	hsa-miR-30a-5p	hsa-miR-455-3p	hsa-miR-4326	hsa-miR-7-5p	hsa-miR-26a-5p	hsa-miR-372-3p	hsa-miR-505-5p	hsa-miR-93-5p	hsa-miR-148b-3p	hsa-miR-221-3p	hsa-miR-337-3p	hsa-miR-146a-5p	hsa-miR-373-3p	hsa-miR-23b-3p	hsa-miR-138-5p	hsa-miR-320c	hsa-miR-335-5p	hsa-miR-27b-3p	hsa-miR-132-3p	hsa-miR-30c-5p	hsa-miR-31-5p	hsa-miR-16-5p	hsa-miR-340-5p
WP438_Non_homologous_end_joining	Pathways	hsa-miR-671-5p	hsa-miR-210-3p	hsa-miR-1-3p	hsa-miR-30a-5p	hsa-miR-100-5p	hsa-miR-877-3p	hsa-miR-7-5p	hsa-miR-373-3p	hsa-miR-193b-3p	hsa-miR-26b-5p	hsa-miR-484	hsa-miR-615-3p	hsa-miR-331-3p	hsa-miR-505-3p	hsa-miR-324-3p	hsa-miR-326	hsa-miR-34a-5p	hsa-miR-766-3p	hsa-miR-221-3p	hsa-miR-181b-5p	hsa-miR-941	hsa-miR-128-3p	hsa-miR-423-3p	hsa-miR-375
hsa05012_Parkinsons_disease	Pathways	hsa-miR-125b-5p	hsa-miR-210-3p	hsa-miR-186-3p	hsa-miR-125a-5p	hsa-let-7a-5p	hsa-miR-877-3p	hsa-miR-1287-5p	hsa-miR-3181	hsa-miR-26b-5p	hsa-miR-484	hsa-miR-615-3p	hsa-miR-196a-5p	hsa-miR-92a-3p	hsa-miR-182-5p	hsa-miR-324-5p	hsa-miR-148b-5p	hsa-miR-505-5p	hsa-miR-423-5p	hsa-miR-1296-5p	hsa-miR-30d-5p	hsa-miR-98-5p	hsa-miR-92b-3p	hsa-miR-130b-3p	hsa-miR-106b-5p	hsa-miR-3198	hsa-miR-744-5p	hsa-miR-101-3p	hsa-miR-92a-1-5p	hsa-miR-18a-3p	hsa-miR-328-3p	hsa-miR-125b-2-3p	hsa-miR-130b-5p	hsa-miR-877-5p	hsa-miR-455-3p	hsa-miR-151a-5p	hsa-miR-148a-3p	hsa-miR-15b-5p	hsa-miR-99a-5p	hsa-miR-24-3p	hsa-miR-1260b	hsa-miR-26a-5p	hsa-miR-147b	hsa-miR-421	hsa-miR-324-3p	hsa-miR-93-5p	hsa-miR-652-3p	hsa-miR-148b-3p	hsa-miR-221-3p
hsa04510_Focal_adhesion	Pathways	hsa-miR-125b-5p	hsa-miR-559	hsa-miR-150-5p	hsa-miR-199a-3p	hsa-miR-19b-1-5p	hsa-let-7a-5p	hsa-miR-96-5p	hsa-miR-141-3p	hsa-miR-218-5p	hsa-miR-877-3p	hsa-miR-33a-5p	hsa-miR-143-3p	hsa-miR-214-3p	hsa-miR-149-3p	hsa-miR-296-3p	hsa-miR-34c-5p	hsa-miR-373-3p	hsa-miR-26b-5p	hsa-miR-484	hsa-miR-107	hsa-miR-615-3p	hsa-miR-144-3p	hsa-miR-497-5p	hsa-miR-196a-5p	hsa-miR-302a-3p	hsa-miR-92a-3p	hsa-miR-342-3p	hsa-miR-182-5p	hsa-miR-324-5p	hsa-miR-520b	hsa-miR-24-2-5p	hsa-miR-338-3p	hsa-miR-766-3p	hsa-miR-320b	hsa-miR-423-5p	hsa-miR-181d-5p	hsa-miR-324-3p	hsa-miR-519c-3p	hsa-miR-500a-3p	hsa-miR-98-5p	hsa-miR-92b-3p	hsa-miR-32-5p	hsa-miR-124-3p	hsa-miR-106b-5p	hsa-miR-644a	hsa-miR-181c-5p	hsa-miR-199b-5p	hsa-miR-744-5p
P04392_P53_pathway_feedback_loops_1	Pathways	hsa-miR-125b-5p	hsa-miR-9-5p	hsa-miR-1180-3p	hsa-miR-150-5p	hsa-miR-125a-5p	hsa-miR-18b-5p	hsa-miR-193a-5p	hsa-miR-215-5p	hsa-miR-10b-5p	hsa-miR-1285-3p	hsa-miR-25-3p	hsa-miR-191-5p	hsa-miR-454-3p	hsa-miR-143-3p	hsa-miR-214-3p	hsa-miR-24-3p	hsa-miR-222-3p	hsa-miR-16-5p	hsa-miR-26b-5p	hsa-miR-484	hsa-miR-15a-5p	hsa-miR-380-5p	hsa-miR-205-5p	hsa-miR-92a-3p	hsa-miR-608	hsa-miR-324-5p	hsa-miR-21-5p	hsa-miR-34a-5p	hsa-miR-145-5p	hsa-miR-221-3p	hsa-miR-504-5p	hsa-miR-30d-5p	hsa-let-7b-5p	hsa-miR-3929	hsa-miR-203a-3p	hsa-miR-605-5p	hsa-miR-485-5p	hsa-miR-32-5p	hsa-miR-124-3p	hsa-miR-612	hsa-miR-192-5p	hsa-miR-27a-3p
hsa00600_Sphingolipid_metabolism	Pathways	hsa-miR-9-5p	hsa-miR-125b-5p	hsa-miR-1229-3p	hsa-miR-149-5p	hsa-miR-1-3p	hsa-miR-215-5p	hsa-miR-1226-3p	hsa-miR-33a-5p	hsa-miR-191-5p	hsa-miR-16-5p	hsa-miR-99a-5p	hsa-miR-7-5p	hsa-miR-93-5p	hsa-miR-744-5p	hsa-miR-374b-5p	hsa-miR-1260b	hsa-miR-484	hsa-miR-615-3p	hsa-miR-331-3p	hsa-miR-30b-5p	hsa-miR-92a-3p	hsa-miR-122-5p	hsa-miR-21-5p	hsa-miR-148b-3p	hsa-miR-19b-3p	hsa-miR-186-5p	hsa-miR-34a-5p	hsa-let-7a-5p	hsa-let-7b-5p	hsa-miR-98-5p	hsa-miR-769-5p	hsa-miR-128-3p	hsa-miR-423-3p	hsa-miR-124-3p	hsa-miR-192-5p	hsa-miR-155-5p	hsa-miR-101-3p	hsa-miR-130b-3p	hsa-miR-335-5p	hsa-miR-375	hsa-miR-26b-5p
hsa00565_Ether_lipid_metabolism	Pathways	hsa-miR-18a-5p	hsa-miR-9-5p	hsa-miR-149-5p	hsa-miR-1-3p	hsa-miR-215-5p	hsa-miR-30a-5p	hsa-miR-100-5p	hsa-miR-877-3p	hsa-miR-16-5p	hsa-miR-7-5p	hsa-miR-146b-5p	hsa-miR-155-5p	hsa-miR-193b-3p	hsa-miR-26b-5p	hsa-miR-15a-5p	hsa-miR-615-3p	hsa-miR-148b-3p	hsa-miR-21-5p	hsa-miR-10a-5p	hsa-miR-338-3p	hsa-miR-449c-5p	hsa-miR-24-3p	hsa-miR-1226-3p	hsa-let-7b-5p	hsa-miR-181a-5p	hsa-miR-98-5p	hsa-miR-128-3p	hsa-miR-92b-3p	hsa-miR-124-3p	hsa-miR-192-5p	hsa-miR-744-5p	hsa-miR-101-3p	hsa-miR-423-5p	hsa-miR-23a-3p	hsa-miR-335-5p	hsa-miR-18a-3p	hsa-miR-375	hsa-miR-1260b
WP259_Nifedipine_Activity	Pathways	hsa-miR-18a-5p	hsa-miR-28-5p	hsa-miR-497-5p	hsa-miR-30a-5p	hsa-miR-30c-5p	hsa-miR-15b-5p	hsa-miR-24-3p	hsa-miR-193b-3p	hsa-miR-26b-5p	hsa-miR-615-3p	hsa-miR-93-3p	hsa-miR-424-5p	hsa-miR-34a-5p	hsa-miR-766-3p	hsa-miR-199a-3p	hsa-let-7b-5p	hsa-miR-181a-5p	hsa-miR-769-5p	hsa-miR-23b-3p	hsa-miR-128-3p	hsa-miR-92b-3p	hsa-miR-124-3p	hsa-miR-101-3p	hsa-miR-335-5p	hsa-miR-320a	hsa-miR-27b-3p
WP558_Complement_and_Coagulation_Cascades	Pathways	hsa-miR-132-3p	hsa-miR-9-5p	hsa-miR-1-3p	hsa-miR-215-5p	hsa-miR-130b-3p	hsa-miR-877-3p	hsa-miR-520e	hsa-miR-16-5p	hsa-miR-340-5p	hsa-miR-7-5p	hsa-miR-92a-3p	hsa-miR-193b-3p	hsa-miR-143-3p	hsa-miR-26b-5p	hsa-miR-204-5p	hsa-miR-548b-3p	hsa-miR-142-3p	hsa-miR-421	hsa-miR-122-5p	hsa-miR-93-5p	hsa-miR-29a-3p	hsa-miR-409-3p	hsa-miR-21-5p	hsa-miR-520b	hsa-miR-29c-3p	hsa-miR-652-3p	hsa-miR-99a-5p	hsa-miR-361-5p	hsa-miR-19b-3p	hsa-miR-145-5p	hsa-miR-186-5p	hsa-miR-301a-3p	hsa-let-7a-5p	hsa-let-7b-5p	hsa-miR-181a-5p	hsa-miR-144-3p	hsa-miR-98-5p	hsa-miR-29b-3p	hsa-miR-23b-3p	hsa-miR-128-3p	hsa-miR-124-3p	hsa-miR-138-5p	hsa-miR-183-5p	hsa-miR-192-5p	hsa-miR-30c-5p	hsa-miR-155-5p	hsa-miR-101-3p	hsa-miR-335-5p
hsa04920_Adipocytokine_signaling_pathway	Pathways	hsa-miR-125b-5p	hsa-miR-210-3p	hsa-miR-125a-5p	hsa-miR-130b-3p	hsa-miR-96-5p	hsa-miR-141-3p	hsa-miR-218-5p	hsa-miR-877-3p	hsa-miR-33a-5p	hsa-miR-143-3p	hsa-miR-214-3p	hsa-miR-149-3p	hsa-miR-22-3p	hsa-miR-324-3p	hsa-miR-26b-5p	hsa-miR-484	hsa-miR-615-3p	hsa-miR-1229-3p	hsa-miR-92a-3p	hsa-miR-182-5p	hsa-miR-324-5p	hsa-miR-140-3p	hsa-miR-199a-3p	hsa-miR-1262	hsa-miR-144-3p	hsa-miR-98-5p	hsa-miR-488-3p	hsa-miR-124-3p	hsa-miR-106b-5p	hsa-miR-744-5p	hsa-miR-92a-1-5p	hsa-miR-200c-3p	hsa-miR-18a-3p	hsa-miR-302c-3p	hsa-miR-130b-5p	hsa-miR-30a-5p	hsa-miR-148a-3p	hsa-miR-99a-5p	hsa-miR-7-5p	hsa-miR-15a-5p	hsa-miR-421	hsa-miR-1296-5p	hsa-miR-93-5p	hsa-miR-30e-3p	hsa-miR-652-3p	hsa-miR-148b-3p	hsa-miR-221-3p	hsa-miR-19b-3p
hsa00380_Tryptophan_metabolism	Pathways	hsa-miR-497-5p	hsa-miR-221-3p	hsa-miR-130b-5p	hsa-miR-1-3p	hsa-miR-215-5p	hsa-let-7a-5p	hsa-miR-30a-5p	hsa-miR-100-5p	hsa-miR-328-3p	hsa-miR-877-3p	hsa-miR-16-5p	hsa-miR-15b-5p	hsa-miR-340-5p	hsa-miR-7-5p	hsa-miR-22-3p	hsa-miR-193b-3p	hsa-miR-1260b	hsa-miR-484	hsa-miR-27b-3p	hsa-miR-615-3p	hsa-miR-30b-5p	hsa-miR-92a-3p	hsa-miR-152-3p	hsa-miR-21-5p	hsa-miR-361-5p	hsa-miR-34a-5p	hsa-miR-186-5p	hsa-miR-296-3p	hsa-miR-1226-3p	hsa-let-7b-5p	hsa-miR-181b-5p	hsa-miR-98-5p	hsa-miR-23b-3p	hsa-miR-128-3p	hsa-miR-92b-3p	hsa-miR-124-3p	hsa-miR-192-5p	hsa-miR-877-5p	hsa-let-7f-5p	hsa-miR-27a-3p	hsa-miR-155-5p	hsa-miR-151a-3p	hsa-miR-99b-5p	hsa-miR-335-5p	hsa-miR-320a	hsa-miR-421	hsa-miR-26b-5p	hsa-miR-103a-3p
P00052_TGF_beta_signaling_pathway	Pathways	hsa-miR-125b-5p	hsa-miR-210-3p	hsa-miR-150-5p	hsa-miR-125a-5p	hsa-miR-130b-3p	hsa-miR-96-5p	hsa-miR-218-5p	hsa-miR-30a-3p	hsa-miR-33a-5p	hsa-miR-143-3p	hsa-miR-214-3p	hsa-miR-22-3p	hsa-miR-26b-5p	hsa-miR-484	hsa-miR-615-3p	hsa-miR-196a-5p	hsa-miR-1180-3p	hsa-miR-92a-3p	hsa-miR-342-3p	hsa-miR-182-5p	hsa-miR-324-5p	hsa-miR-140-3p	hsa-miR-483-3p	hsa-miR-421	hsa-miR-423-5p	hsa-miR-181d-5p	hsa-miR-199a-3p	hsa-miR-30d-5p	hsa-miR-98-5p	hsa-miR-92b-3p	hsa-miR-877-3p	hsa-miR-124-3p	hsa-miR-106b-5p	hsa-miR-766-3p	hsa-miR-181c-5p	hsa-miR-744-5p	hsa-miR-101-3p	hsa-miR-374a-5p	hsa-miR-200c-3p	hsa-miR-18a-3p	hsa-miR-302c-3p	hsa-miR-130b-5p	hsa-miR-376a-5p	hsa-miR-30c-5p	hsa-miR-30a-5p	hsa-miR-455-3p	hsa-miR-148a-3p	hsa-miR-15b-5p
P00022_General_transcription_by_RNA_polymerase_I	Pathways	hsa-miR-9-5p	hsa-miR-26a-5p	hsa-miR-1-3p	hsa-miR-215-5p	hsa-miR-328-3p	hsa-let-7b-5p	hsa-miR-191-5p	hsa-miR-16-5p	hsa-miR-24-3p	hsa-miR-365a-3p	hsa-miR-193b-3p	hsa-miR-760	hsa-miR-484	hsa-miR-615-3p	hsa-miR-342-3p	hsa-miR-93-5p	hsa-miR-10a-5p	hsa-miR-30d-5p	hsa-miR-98-5p	hsa-miR-374a-3p	hsa-miR-124-3p	hsa-miR-192-5p	hsa-miR-155-5p	hsa-miR-335-5p	hsa-miR-424-5p	hsa-miR-18a-3p
hsa04060_Cytokine_cytokine_receptor_interaction	Pathways	hsa-miR-125b-5p	hsa-miR-29c-3p	hsa-miR-210-3p	hsa-miR-150-5p	hsa-miR-19b-1-5p	hsa-miR-130b-3p	hsa-miR-30a-3p	hsa-miR-18a-5p	hsa-miR-34c-5p	hsa-miR-22-3p	hsa-miR-26b-5p	hsa-miR-484	hsa-miR-107	hsa-miR-204-5p	hsa-miR-196a-5p	hsa-miR-92a-3p	hsa-miR-342-3p	hsa-miR-182-5p	hsa-miR-409-3p	hsa-miR-486-5p	hsa-miR-140-3p	hsa-miR-520g-3p	hsa-miR-199a-3p	hsa-miR-98-5p	hsa-let-7i-5p	hsa-miR-877-3p	hsa-miR-124-3p	hsa-miR-106b-5p	hsa-miR-1303	hsa-miR-181c-5p	hsa-miR-744-5p	hsa-miR-101-3p	hsa-miR-134-5p	hsa-miR-503-5p	hsa-miR-200c-3p	hsa-let-7e-5p	hsa-miR-125a-5p	hsa-miR-10b-5p	hsa-miR-379-5p	hsa-miR-302c-3p	hsa-miR-542-5p	hsa-miR-625-5p	hsa-miR-383-5p	hsa-miR-25-3p	hsa-miR-30a-5p	hsa-miR-455-3p	hsa-miR-151a-5p	hsa-miR-148a-3p
P02746_Heme_biosynthesis	Pathways	hsa-miR-9-5p	hsa-miR-1-3p	hsa-miR-130b-3p	hsa-miR-30a-5p	hsa-miR-10b-5p	hsa-miR-218-5p	hsa-miR-25-3p	hsa-miR-16-5p	hsa-miR-15b-5p	hsa-miR-222-3p	hsa-miR-744-5p	hsa-miR-193b-3p	hsa-let-7e-5p	hsa-miR-26b-5p	hsa-miR-1301-3p	hsa-miR-331-3p	hsa-miR-142-3p	hsa-miR-92a-3p	hsa-miR-140-3p	hsa-miR-361-5p	hsa-miR-19b-3p	hsa-miR-937-3p	hsa-miR-17-5p	hsa-let-7b-5p	hsa-miR-98-5p	hsa-miR-29b-2-5p	hsa-miR-92b-3p	hsa-miR-124-3p	hsa-miR-30c-5p	hsa-miR-155-5p	hsa-miR-320a	hsa-miR-375
P02721_ATP_synthesis	Pathways	hsa-miR-125b-5p	hsa-miR-1229-3p	hsa-miR-149-5p	hsa-miR-100-5p	hsa-miR-877-3p	hsa-miR-151a-5p	hsa-miR-16-5p	hsa-miR-148a-3p	hsa-miR-24-3p	hsa-miR-320c	hsa-miR-193b-3p	hsa-miR-26a-5p	hsa-miR-1301-3p	hsa-miR-615-3p	hsa-miR-331-3p	hsa-miR-93-3p	hsa-miR-30b-5p	hsa-miR-92a-3p	hsa-miR-324-3p	hsa-miR-93-5p	hsa-miR-324-5p	hsa-miR-652-3p	hsa-miR-361-5p	hsa-miR-423-5p	hsa-miR-17-5p	hsa-miR-23b-3p	hsa-miR-629-3p	hsa-miR-339-3p	hsa-miR-744-5p	hsa-miR-101-3p	hsa-miR-23a-3p	hsa-miR-320b	hsa-miR-320a	hsa-miR-18a-3p	hsa-let-7f-5p
hsa00564_Glycerophospholipid_metabolism	Pathways	hsa-miR-132-3p	hsa-miR-9-5p	hsa-miR-484	hsa-miR-125b-5p	hsa-miR-1229-3p	hsa-miR-125a-5p	hsa-miR-1-3p	hsa-miR-215-5p	hsa-miR-30a-5p	hsa-miR-100-5p	hsa-miR-877-3p	hsa-miR-16-5p	hsa-miR-15b-5p	hsa-miR-24-3p	hsa-miR-146b-5p	hsa-miR-155-5p	hsa-miR-193b-3p	hsa-miR-374b-5p	hsa-miR-26b-5p	hsa-miR-26a-5p	hsa-miR-15a-5p	hsa-miR-615-3p	hsa-miR-331-3p	hsa-miR-30b-5p	hsa-miR-142-3p	hsa-miR-324-5p	hsa-miR-296-3p	hsa-miR-21-5p	hsa-miR-10a-5p	hsa-miR-149-5p	hsa-miR-338-3p	hsa-miR-145-5p	hsa-miR-186-5p	hsa-miR-7-5p	hsa-let-7d-5p	hsa-miR-1226-3p	hsa-let-7b-5p	hsa-miR-181a-5p	hsa-miR-98-5p	hsa-miR-92b-3p	hsa-miR-378a-5p	hsa-miR-449c-5p	hsa-miR-128-3p	hsa-miR-423-3p	hsa-miR-124-3p	hsa-miR-106b-5p	hsa-miR-183-5p	hsa-miR-192-5p
WP405_Eukaryotic_Transcription_Initiation	Pathways	hsa-miR-132-3p	hsa-miR-1296-5p	hsa-miR-1180-3p	hsa-miR-365a-3p	hsa-miR-149-5p	hsa-miR-1-3p	hsa-miR-215-5p	hsa-let-7a-5p	hsa-miR-30a-5p	hsa-miR-100-5p	hsa-miR-455-3p	hsa-miR-10b-5p	hsa-miR-30d-5p	hsa-miR-33a-5p	hsa-miR-331-3p	hsa-let-7e-5p	hsa-miR-99a-5p	hsa-miR-24-3p	hsa-miR-222-3p	hsa-miR-1260b	hsa-miR-193b-3p	hsa-miR-16-5p	hsa-miR-26b-5p	hsa-miR-484	hsa-miR-1301-3p	hsa-miR-15a-5p	hsa-miR-615-3p	hsa-miR-454-3p	hsa-miR-1268a	hsa-miR-155-5p	hsa-miR-92a-3p	hsa-miR-324-3p	hsa-miR-122-5p	hsa-miR-324-5p	hsa-miR-21-5p	hsa-miR-652-3p	hsa-miR-10a-5p	hsa-miR-361-5p	hsa-miR-34a-5p	hsa-miR-766-3p	hsa-miR-145-5p	hsa-miR-221-3p	hsa-miR-7-5p	hsa-miR-99a-3p	hsa-miR-17-5p	hsa-miR-1226-3p	hsa-let-7b-5p	hsa-miR-625-5p
hsa03420_Nucleotide_excision_repair	Pathways	hsa-miR-132-3p	hsa-miR-18a-5p	hsa-miR-484	hsa-miR-197-3p	hsa-miR-7-5p	hsa-miR-210-3p	hsa-miR-130b-5p	hsa-miR-149-5p	hsa-miR-1-3p	hsa-miR-215-5p	hsa-miR-130b-3p	hsa-miR-30a-5p	hsa-miR-100-5p	hsa-miR-455-3p	hsa-miR-30c-5p	hsa-miR-33a-5p	hsa-miR-31-5p	hsa-miR-16-5p	hsa-miR-25-3p	hsa-miR-99a-5p	hsa-miR-296-3p	hsa-miR-222-3p	hsa-miR-373-3p	hsa-miR-744-5p	hsa-miR-193b-3p	hsa-let-7e-5p	hsa-miR-26b-5p	hsa-miR-26a-5p	hsa-miR-1301-3p	hsa-miR-15a-5p	hsa-miR-615-3p	hsa-miR-196a-5p	hsa-miR-92a-3p	hsa-miR-324-3p	hsa-miR-122-5p	hsa-miR-29a-3p	hsa-miR-324-5p	hsa-miR-521	hsa-miR-23b-3p	hsa-miR-34a-5p	hsa-miR-186-5p	hsa-miR-24-3p	hsa-miR-19b-3p	hsa-miR-17-5p	hsa-miR-1226-3p	hsa-let-7b-5p	hsa-miR-3200-3p	hsa-miR-98-5p
hsa04950_Maturity_onset_diabetes_of_the_young	Pathways	hsa-miR-9-5p	hsa-miR-197-3p	hsa-miR-524-5p	hsa-miR-1-3p	hsa-miR-215-5p	hsa-miR-130b-3p	hsa-miR-30a-5p	hsa-miR-10b-5p	hsa-let-7b-5p	hsa-miR-296-3p	hsa-miR-34c-5p	hsa-miR-26b-5p	hsa-miR-765	hsa-miR-196a-5p	hsa-miR-92a-3p	hsa-miR-320a	hsa-miR-34a-5p	hsa-miR-766-3p	hsa-miR-24-3p	hsa-miR-19b-3p	hsa-miR-222-3p	hsa-miR-192-5p	hsa-miR-34b-5p	hsa-miR-199b-5p	hsa-miR-101-3p	hsa-miR-629-5p	hsa-miR-23a-3p	hsa-miR-335-5p	hsa-miR-449a
hsa00750_Vitamin_B6_metabolism	Pathways	hsa-miR-18a-5p	hsa-miR-125b-5p	hsa-miR-24-3p	hsa-miR-331-3p	hsa-miR-1260b	hsa-miR-193b-3p	hsa-miR-26b-5p	hsa-miR-484	hsa-miR-1-3p	hsa-miR-744-5p	hsa-miR-30a-5p	hsa-miR-504-5p	hsa-miR-92a-3p	hsa-miR-342-3p	hsa-miR-324-5p	hsa-miR-16-5p	hsa-miR-760	hsa-miR-25-3p	hsa-miR-155-5p
hsa04730_Long_term_depression	Pathways	hsa-miR-125b-5p	hsa-miR-24-2-5p	hsa-let-7a-5p	hsa-miR-96-5p	hsa-miR-877-3p	hsa-miR-143-3p	hsa-miR-26b-5p	hsa-miR-484	hsa-miR-615-3p	hsa-miR-497-5p	hsa-miR-196a-5p	hsa-miR-92a-3p	hsa-miR-324-5p	hsa-miR-338-3p	hsa-miR-766-3p	hsa-miR-505-5p	hsa-miR-423-5p	hsa-miR-181d-5p	hsa-miR-199a-3p	hsa-miR-30d-5p	hsa-miR-98-5p	hsa-miR-92b-3p	hsa-miR-32-5p	hsa-miR-124-3p	hsa-miR-181c-5p	hsa-miR-744-5p	hsa-miR-101-3p	hsa-miR-18a-3p	hsa-miR-223-3p	hsa-miR-139-5p	hsa-miR-383-5p	hsa-miR-30a-5p	hsa-miR-15b-5p	hsa-miR-99a-5p	hsa-miR-7-5p	hsa-miR-340-3p	hsa-miR-15a-5p	hsa-miR-622	hsa-miR-421	hsa-miR-324-3p	hsa-miR-93-5p	hsa-miR-126-3p	hsa-miR-148b-3p	hsa-miR-483-5p	hsa-miR-194-5p	hsa-miR-146b-5p	hsa-miR-941	hsa-miR-769-5p
P00059_p53_pathway	Pathways	hsa-miR-125b-5p	hsa-miR-559	hsa-miR-150-5p	hsa-miR-125a-5p	hsa-miR-193a-5p	hsa-miR-96-5p	hsa-miR-141-3p	hsa-miR-30d-5p	hsa-miR-877-3p	hsa-miR-942-5p	hsa-miR-143-3p	hsa-miR-214-3p	hsa-miR-149-3p	hsa-miR-296-3p	hsa-miR-22-3p	hsa-miR-26b-5p	hsa-miR-484	hsa-miR-615-3p	hsa-miR-885-5p	hsa-miR-1229-3p	hsa-miR-92a-3p	hsa-miR-342-3p	hsa-miR-182-5p	hsa-miR-324-5p	hsa-miR-520b	hsa-miR-520h	hsa-miR-505-5p	hsa-miR-423-5p	hsa-miR-181d-5p	hsa-miR-324-3p	hsa-miR-519c-3p	hsa-miR-548a-3p	hsa-miR-144-3p	hsa-miR-98-5p	hsa-let-7i-5p	hsa-miR-657	hsa-miR-92b-3p	hsa-miR-32-5p	hsa-miR-124-3p	hsa-miR-106b-5p	hsa-miR-181c-5p	hsa-miR-744-5p	hsa-miR-101-3p	hsa-miR-374a-5p	hsa-miR-503-5p	hsa-miR-200c-3p	hsa-miR-18a-3p	hsa-miR-328-3p
hsa00980_Metabolism_of_xenobiotics_by_cytochrome_P450	Pathways	hsa-miR-132-3p	hsa-miR-9-5p	hsa-miR-197-3p	hsa-miR-1-3p	hsa-miR-30a-5p	hsa-miR-96-5p	hsa-let-7e-5p	hsa-miR-340-5p	hsa-miR-7-5p	hsa-miR-185-5p	hsa-miR-340-3p	hsa-miR-193b-3p	hsa-miR-16-5p	hsa-miR-26b-5p	hsa-miR-196a-5p	hsa-miR-142-3p	hsa-miR-92a-3p	hsa-miR-122-5p	hsa-miR-652-3p	hsa-miR-148b-3p	hsa-miR-145-5p	hsa-miR-221-3p	hsa-miR-296-3p	hsa-miR-488-5p	hsa-let-7b-5p	hsa-miR-181a-5p	hsa-miR-98-5p	hsa-miR-133a-3p	hsa-miR-92b-3p	hsa-miR-488-3p	hsa-miR-124-3p	hsa-miR-106b-5p	hsa-miR-27b-3p	hsa-miR-155-5p	hsa-miR-335-5p	hsa-miR-513a-3p	hsa-miR-107	hsa-miR-103a-3p
hsa04150_mTOR_signaling_pathway	Pathways	hsa-miR-125b-5p	hsa-miR-150-5p	hsa-miR-125a-5p	hsa-miR-130b-3p	hsa-miR-218-5p	hsa-miR-877-3p	hsa-miR-33a-5p	hsa-miR-143-3p	hsa-miR-149-3p	hsa-miR-296-3p	hsa-miR-373-3p	hsa-miR-26b-5p	hsa-miR-484	hsa-miR-615-3p	hsa-miR-92a-3p	hsa-miR-182-5p	hsa-miR-520h	hsa-miR-766-3p	hsa-miR-423-5p	hsa-miR-199a-3p	hsa-miR-519c-3p	hsa-miR-144-3p	hsa-miR-98-5p	hsa-miR-9-5p	hsa-miR-92b-3p	hsa-miR-32-5p	hsa-miR-23b-5p	hsa-miR-106b-5p	hsa-miR-124-3p	hsa-miR-199b-5p	hsa-miR-744-5p	hsa-miR-101-3p	hsa-miR-134-5p	hsa-miR-503-5p	hsa-miR-200c-3p	hsa-miR-18a-3p	hsa-miR-302c-3p	hsa-miR-383-5p	hsa-miR-30c-5p	hsa-miR-30a-5p	hsa-miR-4326	hsa-miR-15b-5p	hsa-miR-99a-5p	hsa-miR-7-5p	hsa-miR-1260b	hsa-miR-15a-5p	hsa-miR-505-5p	hsa-miR-1296-5p
P00024_Glycolysis	Pathways	hsa-miR-3177-3p	hsa-miR-125a-5p	hsa-miR-30a-5p	hsa-miR-196b-5p	hsa-miR-615-3p	hsa-miR-10a-5p	hsa-miR-222-3p	hsa-miR-93-5p	hsa-miR-340-3p	hsa-miR-1260b	hsa-miR-484	hsa-miR-1301-3p	hsa-miR-204-5p	hsa-miR-93-3p	hsa-miR-92a-3p	hsa-miR-324-3p	hsa-miR-122-5p	hsa-miR-324-5p	hsa-miR-148b-3p	hsa-miR-181d-5p	hsa-miR-1296-5p	hsa-let-7b-5p	hsa-miR-181a-5p	hsa-miR-23b-3p	hsa-miR-128-3p	hsa-miR-92b-3p	hsa-miR-378a-3p	hsa-miR-20a-5p	hsa-miR-744-5p	hsa-miR-99b-5p	hsa-miR-18a-3p	hsa-miR-10b-5p
hsa03010_Ribosome	Pathways	hsa-miR-125b-5p	hsa-miR-378c	hsa-miR-125a-5p	hsa-miR-193a-5p	hsa-miR-1226-3p	hsa-miR-96-5p	hsa-miR-218-5p	hsa-miR-877-3p	hsa-miR-33a-5p	hsa-miR-18a-5p	hsa-miR-296-3p	hsa-miR-22-3p	hsa-miR-324-3p	hsa-miR-26b-5p	hsa-miR-484	hsa-miR-3188	hsa-miR-204-5p	hsa-miR-196a-5p	hsa-miR-1180-3p	hsa-miR-92a-3p	hsa-miR-342-3p	hsa-miR-182-5p	hsa-miR-324-5p	hsa-miR-140-3p	hsa-miR-3943	hsa-miR-501-5p	hsa-miR-766-3p	hsa-miR-421	hsa-miR-423-5p	hsa-miR-221-5p	hsa-miR-30d-5p	hsa-miR-361-3p	hsa-miR-10b-5p	hsa-miR-92b-3p	hsa-miR-32-5p	hsa-miR-1303	hsa-miR-106b-5p	hsa-miR-124-3p	hsa-miR-744-5p	hsa-miR-503-5p	hsa-miR-18a-3p	hsa-miR-422a	hsa-miR-328-3p	hsa-miR-139-5p	hsa-miR-1237-3p	hsa-miR-130b-5p	hsa-miR-30a-3p	hsa-miR-877-5p
hsa05414_Dilated_cardiomyopathy	Pathways	hsa-miR-125b-5p	hsa-miR-19b-1-5p	hsa-let-7a-5p	hsa-miR-96-5p	hsa-miR-9-3p	hsa-miR-877-3p	hsa-miR-296-3p	hsa-miR-671-5p	hsa-miR-26b-5p	hsa-miR-484	hsa-miR-615-3p	hsa-miR-196a-5p	hsa-miR-1229-3p	hsa-miR-92a-3p	hsa-miR-342-3p	hsa-miR-182-5p	hsa-miR-324-5p	hsa-miR-125a-5p	hsa-miR-423-5p	hsa-miR-1296-5p	hsa-miR-98-5p	hsa-miR-32-5p	hsa-miR-124-3p	hsa-miR-644a	hsa-miR-744-5p	hsa-miR-18a-3p	hsa-miR-30c-5p	hsa-miR-877-5p	hsa-miR-455-3p	hsa-miR-15b-5p	hsa-miR-99a-5p	hsa-miR-7-5p	hsa-miR-1227-3p	hsa-miR-26a-5p	hsa-miR-324-3p	hsa-miR-93-5p	hsa-miR-29a-3p	hsa-miR-326	hsa-miR-1307-3p	hsa-miR-652-3p	hsa-miR-148b-3p	hsa-miR-221-3p	hsa-miR-194-5p	hsa-miR-19b-3p	hsa-miR-365a-3p	hsa-miR-940	hsa-miR-22-3p	hsa-miR-769-5p
hsa04664_Fc_epsilon_RI_signaling_pathway	Pathways	hsa-miR-125b-5p	hsa-miR-24-2-5p	hsa-miR-96-5p	hsa-miR-877-3p	hsa-miR-33a-5p	hsa-miR-143-3p	hsa-miR-214-3p	hsa-miR-149-3p	hsa-miR-296-3p	hsa-miR-1914-3p	hsa-miR-26b-5p	hsa-miR-484	hsa-miR-615-3p	hsa-miR-497-5p	hsa-miR-92a-3p	hsa-miR-342-3p	hsa-miR-125a-5p	hsa-miR-338-3p	hsa-miR-766-3p	hsa-miR-181d-5p	hsa-miR-199a-3p	hsa-miR-98-5p	hsa-let-7i-5p	hsa-miR-92b-3p	hsa-miR-124-3p	hsa-miR-106b-5p	hsa-miR-181c-5p	hsa-miR-744-5p	hsa-miR-101-3p	hsa-miR-18a-3p	hsa-miR-302c-3p	hsa-miR-30a-5p	hsa-miR-425-5p	hsa-miR-15b-5p	hsa-miR-24-3p	hsa-miR-15a-5p	hsa-miR-622	hsa-miR-421	hsa-miR-1296-5p	hsa-miR-93-5p	hsa-miR-29a-3p	hsa-miR-652-3p	hsa-miR-148b-3p	hsa-miR-483-5p	hsa-miR-194-5p	hsa-miR-222-3p	hsa-miR-769-5p	hsa-miR-23b-3p
P04393_Ras_Pathway	Pathways	hsa-miR-125b-5p	hsa-miR-125a-5p	hsa-miR-96-5p	hsa-miR-877-3p	hsa-miR-33a-5p	hsa-miR-143-3p	hsa-miR-214-3p	hsa-miR-149-3p	hsa-miR-324-3p	hsa-miR-26b-5p	hsa-miR-484	hsa-miR-615-3p	hsa-miR-1229-3p	hsa-miR-92a-3p	hsa-miR-342-3p	hsa-miR-324-5p	hsa-miR-320b	hsa-miR-140-3p	hsa-miR-766-3p	hsa-miR-423-5p	hsa-miR-181d-5p	hsa-miR-199a-3p	hsa-miR-30d-5p	hsa-miR-500a-3p	hsa-miR-98-5p	hsa-miR-92b-3p	hsa-miR-124-3p	hsa-miR-106b-5p	hsa-miR-181c-5p	hsa-miR-744-5p	hsa-miR-101-3p	hsa-miR-503-5p	hsa-miR-200c-3p	hsa-miR-18a-3p	hsa-miR-302c-3p	hsa-miR-30a-5p	hsa-miR-455-3p	hsa-miR-148a-3p	hsa-miR-15b-5p	hsa-miR-24-3p	hsa-miR-26a-5p	hsa-miR-15a-5p	hsa-miR-429	hsa-miR-622	hsa-miR-421	hsa-miR-1296-5p	hsa-miR-93-5p	hsa-miR-29a-3p
hsa04530_Tight_junction	Pathways	hsa-miR-125b-5p	hsa-miR-24-2-5p	hsa-miR-941	hsa-let-7a-5p	hsa-miR-96-5p	hsa-miR-141-3p	hsa-miR-218-5p	hsa-miR-877-3p	hsa-miR-33a-5p	hsa-miR-143-3p	hsa-miR-214-3p	hsa-miR-149-3p	hsa-miR-296-3p	hsa-miR-34c-5p	hsa-miR-22-3p	hsa-miR-26b-5p	hsa-miR-484	hsa-miR-107	hsa-miR-615-3p	hsa-miR-196a-5p	hsa-miR-302a-3p	hsa-miR-92a-3p	hsa-miR-342-3p	hsa-miR-182-5p	hsa-miR-324-5p	hsa-miR-125a-5p	hsa-miR-532-3p	hsa-miR-766-3p	hsa-miR-505-5p	hsa-miR-423-5p	hsa-miR-181d-5p	hsa-miR-324-3p	hsa-miR-19b-3p	hsa-miR-30d-5p	hsa-miR-144-3p	hsa-miR-98-5p	hsa-miR-92b-3p	hsa-miR-124-3p	hsa-miR-106b-5p	hsa-miR-644a	hsa-miR-181c-5p	hsa-miR-744-5p	hsa-miR-101-3p	hsa-miR-200c-3p	hsa-miR-18a-3p	hsa-miR-223-3p	hsa-miR-302c-3p	hsa-miR-192-5p
hsa00400_Phenylalanine_tyrosine_and_tryptophan_biosynthesis	Pathways	hsa-miR-769-5p	hsa-miR-17-3p	hsa-miR-484	hsa-miR-1-3p	hsa-miR-93-3p	hsa-miR-196a-5p	hsa-miR-335-5p	hsa-miR-92a-3p	hsa-miR-342-3p	hsa-miR-16-5p
WP690_Polyol_pathway	Pathways	hsa-miR-378a-3p	hsa-miR-124-3p	hsa-miR-10a-5p	hsa-miR-26b-5p	hsa-miR-484	hsa-miR-34a-5p	hsa-miR-1226-3p	hsa-miR-375	hsa-miR-98-5p	hsa-miR-342-5p
WP623_Oxidative_phosphorylation	Pathways	hsa-miR-147b	hsa-miR-125b-5p	hsa-miR-484	hsa-miR-671-5p	hsa-miR-1296-5p	hsa-miR-1229-3p	hsa-miR-221-3p	hsa-miR-149-5p	hsa-miR-1-3p	hsa-miR-215-5p	hsa-let-7a-5p	hsa-miR-877-5p	hsa-miR-100-5p	hsa-miR-455-3p	hsa-miR-877-3p	hsa-miR-151a-5p	hsa-miR-16-5p	hsa-miR-590-3p	hsa-miR-99a-5p	hsa-miR-24-3p	hsa-miR-185-5p	hsa-miR-3181	hsa-miR-193b-3p	hsa-let-7e-5p	hsa-miR-1260b	hsa-miR-26a-5p	hsa-miR-1301-3p	hsa-miR-15a-5p	hsa-miR-615-3p	hsa-miR-331-3p	hsa-miR-148b-3p	hsa-miR-940	hsa-miR-92a-3p	hsa-miR-324-3p	hsa-miR-93-5p	hsa-miR-182-5p	hsa-miR-132-3p	hsa-miR-324-5p	hsa-miR-335-5p	hsa-miR-7-5p	hsa-miR-128-3p	hsa-miR-652-3p	hsa-miR-10a-5p	hsa-miR-125a-5p	hsa-miR-505-5p	hsa-miR-19b-3p	hsa-miR-145-5p	hsa-miR-186-5p
hsa05310_Asthma	Pathways	hsa-let-7i-5p	hsa-miR-203a-3p	hsa-miR-486-5p	hsa-miR-148b-3p	hsa-miR-454-5p	hsa-miR-26b-5p	hsa-let-7g-5p	hsa-let-7f-5p	hsa-miR-335-5p	hsa-let-7d-5p	hsa-miR-224-5p	hsa-miR-146a-5p	hsa-miR-122-5p	hsa-miR-106a-5p	hsa-miR-98-5p
WP313_Signaling_of_Hepatocyte_Growth_Factor_Receptor	Pathways	hsa-miR-18a-5p	hsa-miR-125b-5p	hsa-miR-125a-5p	hsa-miR-9-3p	hsa-miR-33a-5p	hsa-miR-143-3p	hsa-miR-214-3p	hsa-miR-296-3p	hsa-miR-26b-5p	hsa-miR-615-3p	hsa-miR-92a-3p	hsa-miR-342-3p	hsa-miR-218-5p	hsa-miR-140-3p	hsa-miR-766-3p	hsa-miR-423-5p	hsa-miR-181d-5p	hsa-miR-199a-3p	hsa-miR-519c-3p	hsa-miR-144-3p	hsa-miR-98-5p	hsa-miR-92b-3p	hsa-miR-32-5p	hsa-miR-124-3p	hsa-miR-106b-5p	hsa-miR-129-1-3p	hsa-miR-101-3p	hsa-miR-193a-3p	hsa-miR-518b	hsa-miR-139-5p	hsa-miR-130b-5p	hsa-miR-25-3p	hsa-miR-30a-5p	hsa-miR-15b-5p	hsa-miR-7-5p	hsa-miR-1260b	hsa-miR-26a-5p	hsa-miR-15a-5p	hsa-miR-421	hsa-miR-93-5p	hsa-miR-29a-3p	hsa-miR-137	hsa-miR-148b-3p	hsa-miR-483-5p	hsa-miR-221-3p	hsa-miR-19b-3p	hsa-miR-433-3p	hsa-miR-29b-3p
hsa00190_Oxidative_phosphorylation	Pathways	hsa-miR-125b-5p	hsa-miR-125a-5p	hsa-miR-130b-3p	hsa-miR-218-5p	hsa-miR-877-3p	hsa-miR-3181	hsa-miR-26b-5p	hsa-miR-484	hsa-miR-615-3p	hsa-miR-196a-5p	hsa-miR-92a-3p	hsa-miR-182-5p	hsa-miR-324-5p	hsa-let-7c-3p	hsa-miR-421	hsa-miR-423-5p	hsa-miR-324-3p	hsa-miR-98-5p	hsa-miR-92b-3p	hsa-miR-124-3p	hsa-miR-106b-5p	hsa-miR-744-5p	hsa-miR-101-3p	hsa-miR-503-5p	hsa-miR-125a-3p	hsa-miR-125b-2-3p	hsa-miR-130b-5p	hsa-miR-877-5p	hsa-miR-455-3p	hsa-miR-151a-5p	hsa-miR-148a-3p	hsa-miR-15b-5p	hsa-miR-99a-5p	hsa-miR-24-3p	hsa-miR-1260b	hsa-miR-26a-5p	hsa-miR-15a-5p	hsa-miR-147b	hsa-miR-505-5p	hsa-miR-1296-5p	hsa-miR-93-5p	hsa-miR-652-3p	hsa-miR-148b-3p	hsa-miR-221-3p	hsa-miR-760	hsa-miR-18a-3p	hsa-miR-1226-5p	hsa-miR-23b-3p
P00034_Integrin_signalling_pathway	Pathways	hsa-miR-125b-5p	hsa-miR-559	hsa-miR-125a-5p	hsa-let-7a-5p	hsa-miR-96-5p	hsa-miR-218-5p	hsa-miR-877-3p	hsa-miR-33a-5p	hsa-miR-143-3p	hsa-miR-214-3p	hsa-miR-296-3p	hsa-miR-34c-5p	hsa-miR-22-3p	hsa-miR-26b-5p	hsa-miR-484	hsa-miR-107	hsa-miR-615-3p	hsa-miR-497-5p	hsa-miR-196a-5p	hsa-miR-1229-3p	hsa-miR-92a-3p	hsa-miR-342-3p	hsa-miR-182-5p	hsa-miR-324-5p	hsa-miR-520b	hsa-miR-19b-1-5p	hsa-miR-423-5p	hsa-miR-181d-5p	hsa-miR-199a-3p	hsa-miR-19b-3p	hsa-miR-500a-3p	hsa-miR-98-5p	hsa-let-7i-5p	hsa-miR-92b-3p	hsa-miR-32-5p	hsa-miR-124-3p	hsa-miR-106b-5p	hsa-miR-644a	hsa-miR-129-1-3p	hsa-miR-199b-5p	hsa-miR-744-5p	hsa-miR-372-3p	hsa-miR-200c-3p	hsa-miR-18a-3p	hsa-miR-223-3p	hsa-miR-193a-3p	hsa-miR-518b	hsa-miR-181c-5p
hsa00563_GlycosylphosphatidylinositolGPI_anchor_biosynthesis	Pathways	hsa-miR-125b-5p	hsa-miR-9-5p	hsa-miR-149-5p	hsa-miR-1-3p	hsa-miR-215-5p	hsa-miR-877-3p	hsa-let-7e-5p	hsa-miR-590-3p	hsa-miR-7-5p	hsa-miR-222-3p	hsa-miR-16-5p	hsa-miR-26b-5p	hsa-miR-26a-5p	hsa-miR-331-3p	hsa-miR-505-3p	hsa-miR-92a-3p	hsa-miR-941	hsa-miR-21-5p	hsa-miR-326	hsa-miR-34a-5p	hsa-miR-145-5p	hsa-miR-186-5p	hsa-miR-17-5p	hsa-let-7a-5p	hsa-let-7b-5p	hsa-miR-98-5p	hsa-miR-29b-3p	hsa-miR-92b-3p	hsa-miR-3157-5p	hsa-miR-192-5p	hsa-miR-744-5p	hsa-miR-335-5p	hsa-miR-320a	hsa-miR-375
WP127_IL_5_signaling_pathway	Pathways	hsa-miR-125b-5p	hsa-miR-96-5p	hsa-miR-218-5p	hsa-miR-877-3p	hsa-miR-143-3p	hsa-miR-149-3p	hsa-miR-296-3p	hsa-miR-34c-5p	hsa-miR-324-3p	hsa-miR-26b-5p	hsa-miR-484	hsa-miR-615-3p	hsa-miR-497-5p	hsa-miR-1229-3p	hsa-miR-92a-3p	hsa-miR-342-3p	hsa-miR-182-5p	hsa-miR-766-3p	hsa-miR-423-5p	hsa-miR-199a-3p	hsa-miR-98-5p	hsa-miR-92b-3p	hsa-miR-124-3p	hsa-miR-181c-5p	hsa-miR-744-5p	hsa-miR-101-3p	hsa-miR-200c-3p	hsa-miR-18a-3p	hsa-miR-302c-3p	hsa-miR-130b-5p	hsa-miR-30a-5p	hsa-miR-15b-5p	hsa-miR-99a-5p	hsa-miR-7-5p	hsa-miR-1260b	hsa-miR-26a-5p	hsa-miR-15a-5p	hsa-miR-429	hsa-miR-622	hsa-miR-1296-5p	hsa-miR-93-5p	hsa-miR-29a-3p	hsa-miR-652-3p	hsa-miR-221-3p	hsa-miR-337-3p	hsa-miR-222-3p	hsa-miR-29b-3p	hsa-miR-769-5p
hsa04114_Oocyte_meiosis	Pathways	hsa-miR-125b-5p	hsa-miR-210-3p	hsa-miR-125a-5p	hsa-let-7a-5p	hsa-miR-96-5p	hsa-miR-877-3p	hsa-miR-33a-5p	hsa-miR-214-3p	hsa-miR-18a-5p	hsa-miR-34c-5p	hsa-miR-22-3p	hsa-miR-26b-5p	hsa-miR-484	hsa-miR-615-3p	hsa-miR-885-5p	hsa-miR-376a-3p	hsa-miR-196a-5p	hsa-miR-188-5p	hsa-miR-92a-3p	hsa-miR-182-5p	hsa-miR-324-5p	hsa-miR-320b	hsa-miR-874-3p	hsa-miR-450a-5p	hsa-miR-532-3p	hsa-miR-219a-5p	hsa-miR-766-3p	hsa-miR-505-5p	hsa-miR-423-5p	hsa-miR-199a-3p	hsa-miR-98-5p	hsa-miR-92b-3p	hsa-miR-32-5p	hsa-miR-124-3p	hsa-miR-106b-5p	hsa-miR-25-3p	hsa-miR-744-5p	hsa-miR-101-3p	hsa-miR-151a-3p	hsa-miR-503-5p	hsa-miR-200c-3p	hsa-miR-132-5p	hsa-miR-223-3p	hsa-miR-193a-3p	hsa-miR-328-3p	hsa-miR-139-5p	hsa-miR-383-5p	hsa-miR-30a-3p
WP45_G1_to_S_cell_cycle_control	Pathways	hsa-miR-125b-5p	hsa-miR-210-3p	hsa-miR-150-5p	hsa-miR-19b-1-5p	hsa-miR-675-5p	hsa-miR-130b-3p	hsa-miR-96-5p	hsa-miR-218-5p	hsa-miR-877-3p	hsa-miR-942-5p	hsa-miR-143-3p	hsa-miR-214-3p	hsa-miR-149-3p	hsa-miR-296-3p	hsa-miR-34c-5p	hsa-miR-22-3p	hsa-miR-26b-5p	hsa-miR-484	hsa-miR-615-3p	hsa-miR-885-5p	hsa-miR-196a-5p	hsa-miR-1229-3p	hsa-miR-92a-3p	hsa-miR-342-3p	hsa-miR-182-5p	hsa-miR-324-5p	hsa-miR-520b	hsa-miR-125a-5p	hsa-miR-338-3p	hsa-miR-766-3p	hsa-miR-320b	hsa-miR-505-5p	hsa-miR-423-5p	hsa-miR-190a-5p	hsa-miR-1296-5p	hsa-miR-519c-3p	hsa-miR-98-5p	hsa-let-7i-5p	hsa-miR-657	hsa-miR-92b-3p	hsa-miR-32-5p	hsa-miR-124-3p	hsa-miR-106b-5p	hsa-miR-1303	hsa-miR-744-5p	hsa-miR-101-3p	hsa-miR-374a-5p	hsa-miR-503-5p
hsa05219_Bladder_cancer	Pathways	hsa-miR-125b-5p	hsa-miR-559	hsa-miR-210-3p	hsa-miR-150-5p	hsa-miR-361-5p	hsa-miR-19b-1-5p	hsa-miR-675-5p	hsa-miR-130b-3p	hsa-miR-96-5p	hsa-miR-30d-5p	hsa-miR-877-3p	hsa-miR-942-5p	hsa-miR-143-3p	hsa-miR-214-3p	hsa-miR-149-3p	hsa-miR-296-3p	hsa-miR-34c-5p	hsa-miR-22-3p	hsa-miR-26b-5p	hsa-miR-484	hsa-miR-615-3p	hsa-miR-196a-5p	hsa-miR-1229-3p	hsa-miR-92a-3p	hsa-miR-182-5p	hsa-miR-324-5p	hsa-miR-520b	hsa-miR-373-3p	hsa-miR-520h	hsa-miR-338-3p	hsa-miR-766-3p	hsa-miR-423-5p	hsa-miR-181d-5p	hsa-miR-199a-3p	hsa-miR-519c-3p	hsa-miR-98-5p	hsa-miR-657	hsa-miR-92b-3p	hsa-miR-32-5p	hsa-miR-124-3p	hsa-miR-106b-5p	hsa-miR-181c-5p	hsa-miR-199b-5p	hsa-miR-744-5p	hsa-miR-372-3p	hsa-miR-134-5p	hsa-miR-503-5p	hsa-miR-200c-3p
P00035_Interferon_gamma_signaling_pathway	Pathways	hsa-miR-125b-5p	hsa-miR-28-5p	hsa-miR-203a-3p	hsa-miR-9-5p	hsa-miR-199a-3p	hsa-miR-125a-5p	hsa-miR-20a-5p	hsa-miR-215-5p	hsa-miR-130b-3p	hsa-miR-30a-5p	hsa-miR-424-5p	hsa-miR-141-3p	hsa-miR-218-5p	hsa-miR-30c-5p	hsa-miR-33a-5p	hsa-miR-16-5p	hsa-miR-214-3p	hsa-miR-15b-5p	hsa-miR-24-3p	hsa-miR-195-5p	hsa-miR-193b-3p	hsa-miR-26b-5p	hsa-miR-15a-5p	hsa-miR-615-3p	hsa-miR-196a-5p	hsa-miR-140-3p	hsa-miR-421	hsa-miR-1296-5p	hsa-miR-122-5p	hsa-miR-320b	hsa-miR-409-3p	hsa-miR-21-5p	hsa-miR-130b-5p	hsa-miR-7-5p	hsa-miR-93-5p	hsa-miR-10a-5p	hsa-miR-483-5p	hsa-miR-489-3p	hsa-miR-34a-5p	hsa-miR-766-3p	hsa-miR-145-5p	hsa-miR-92a-3p	hsa-miR-194-5p	hsa-miR-423-3p	hsa-miR-19b-3p	hsa-miR-17-5p	hsa-let-7a-5p	hsa-let-7b-5p
hsa00760_Nicotinate_and_nicotinamide_metabolism	Pathways	hsa-miR-9-5p	hsa-miR-125b-5p	hsa-miR-125a-5p	hsa-miR-1-3p	hsa-miR-215-5p	hsa-let-7c-3p	hsa-miR-30a-5p	hsa-miR-16-5p	hsa-miR-193b-3p	hsa-miR-26b-5p	hsa-miR-615-3p	hsa-miR-196a-5p	hsa-miR-92a-3p	hsa-miR-1296-5p	hsa-miR-122-5p	hsa-miR-21-5p	hsa-miR-34a-5p	hsa-miR-186-5p	hsa-miR-1226-3p	hsa-miR-181a-5p	hsa-miR-98-5p	hsa-miR-29b-3p	hsa-miR-133a-3p	hsa-miR-423-3p	hsa-miR-124-3p	hsa-miR-106b-5p	hsa-miR-192-5p	hsa-miR-155-5p	hsa-miR-335-5p	hsa-miR-320a	hsa-miR-425-5p	hsa-miR-375
WP404_Nucleotide_Metabolism	Pathways	hsa-miR-125b-5p	hsa-let-7g-5p	hsa-miR-26a-5p	hsa-miR-28-5p	hsa-miR-7-5p	hsa-miR-1229-3p	hsa-miR-125a-5p	hsa-miR-376a-5p	hsa-miR-1-3p	hsa-miR-215-5p	hsa-miR-877-3p	hsa-miR-30a-5p	hsa-miR-100-5p	hsa-miR-96-5p	hsa-miR-935	hsa-miR-30d-5p	hsa-miR-30c-5p	hsa-miR-192-5p	hsa-miR-16-5p	hsa-miR-197-3p	hsa-miR-15b-5p	hsa-miR-186-5p	hsa-miR-24-3p	hsa-miR-744-5p	hsa-miR-193b-3p	hsa-let-7e-5p	hsa-miR-26b-5p	hsa-miR-484	hsa-miR-1301-3p	hsa-miR-615-3p	hsa-miR-93-3p	hsa-miR-142-3p	hsa-miR-92a-3p	hsa-miR-342-3p	hsa-miR-29a-3p	hsa-miR-324-5p	hsa-miR-296-3p	hsa-miR-29c-3p	hsa-miR-320a	hsa-miR-652-3p	hsa-miR-10a-5p	hsa-miR-19b-3p	hsa-miR-221-3p	hsa-miR-455-3p	hsa-miR-423-5p	hsa-miR-34a-5p	hsa-miR-30e-5p	hsa-let-7a-5p
P02757_O_antigen_biosynthesis	Pathways	hsa-miR-590-3p	hsa-miR-128-3p	hsa-miR-32-5p	hsa-miR-124-3p	hsa-miR-375	hsa-miR-26b-5p	hsa-miR-149-5p	hsa-miR-34a-5p	hsa-miR-155-5p	hsa-miR-101-3p	hsa-miR-30b-5p	hsa-miR-335-5p	hsa-let-7b-5p	hsa-miR-16-5p
WP206_Fatty_Acid_Omega_Oxidation	Pathways	hsa-miR-132-3p	hsa-miR-296-3p	hsa-miR-488-3p	hsa-miR-26b-5p	hsa-miR-615-3p	hsa-miR-1-3p	hsa-miR-488-5p	hsa-miR-335-5p	hsa-let-7b-5p	hsa-miR-16-5p	hsa-miR-27b-3p
WP22_IL_9_signaling_pathway	Pathways	hsa-miR-125b-5p	hsa-miR-28-5p	hsa-miR-376a-3p	hsa-miR-1229-3p	hsa-miR-199a-3p	hsa-miR-1-3p	hsa-miR-30a-5p	hsa-miR-100-5p	hsa-miR-146a-5p	hsa-miR-30c-5p	hsa-miR-16-5p	hsa-miR-15b-5p	hsa-miR-7-5p	hsa-miR-433-3p	hsa-miR-93-3p	hsa-miR-193b-3p	hsa-let-7e-5p	hsa-miR-615-3p	hsa-miR-497-5p	hsa-miR-92a-3p	hsa-miR-324-3p	hsa-miR-93-5p	hsa-miR-29a-3p	hsa-miR-320b	hsa-miR-296-3p	hsa-miR-21-5p	hsa-miR-424-5p	hsa-miR-483-5p	hsa-miR-34a-5p	hsa-miR-766-3p	hsa-miR-145-5p	hsa-miR-133a-3p	hsa-miR-337-3p	hsa-miR-17-5p	hsa-let-7a-5p	hsa-let-7b-5p	hsa-miR-181a-5p	hsa-miR-423-3p	hsa-miR-769-5p	hsa-miR-23b-3p	hsa-miR-128-3p	hsa-miR-92b-3p	hsa-miR-378a-3p	hsa-miR-124-3p	hsa-miR-106b-5p	hsa-miR-20a-5p	hsa-miR-20b-5p	hsa-miR-155-5p
hsa04914_Progesterone_mediated_oocyte_maturation	Pathways	hsa-miR-125b-5p	hsa-miR-199a-3p	hsa-miR-125a-5p	hsa-miR-1226-3p	hsa-miR-96-5p	hsa-miR-141-3p	hsa-miR-877-3p	hsa-miR-33a-5p	hsa-miR-143-3p	hsa-miR-214-3p	hsa-miR-149-3p	hsa-miR-26b-3p	hsa-miR-296-3p	hsa-miR-22-3p	hsa-miR-26b-5p	hsa-miR-484	hsa-miR-204-5p	hsa-miR-885-5p	hsa-miR-497-5p	hsa-miR-196a-5p	hsa-miR-1229-3p	hsa-miR-92a-3p	hsa-miR-182-5p	hsa-miR-324-5p	hsa-miR-320b	hsa-miR-874-3p	hsa-miR-140-3p	hsa-miR-3943	hsa-miR-501-5p	hsa-miR-766-3p	hsa-miR-181d-5p	hsa-miR-324-3p	hsa-miR-30d-5p	hsa-miR-98-5p	hsa-let-7i-5p	hsa-miR-92b-3p	hsa-miR-32-5p	hsa-miR-124-3p	hsa-miR-106b-5p	hsa-miR-181c-5p	hsa-miR-744-5p	hsa-miR-101-3p	hsa-miR-503-5p	hsa-miR-18a-3p	hsa-miR-1227-3p	hsa-miR-302c-3p	hsa-miR-383-5p	hsa-miR-30c-5p
WP24_Peptide_GPCRs	Pathways	hsa-miR-203a-3p	hsa-miR-150-5p	hsa-miR-1-3p	hsa-miR-877-5p	hsa-miR-148a-3p	hsa-miR-155-5p	hsa-miR-26b-5p	hsa-miR-142-3p	hsa-miR-21-5p	hsa-miR-148b-3p	hsa-miR-200c-3p	hsa-miR-146a-5p	hsa-miR-181a-5p	hsa-miR-128-3p	hsa-miR-17-3p	hsa-miR-124-3p	hsa-miR-106b-5p	hsa-miR-802	hsa-miR-744-5p	hsa-miR-335-5p	hsa-miR-320a	hsa-miR-224-5p	hsa-miR-27b-3p
WP134_Pentose_Phosphate_Pathway	Pathways	hsa-miR-484	hsa-miR-149-5p	hsa-miR-1-3p	hsa-miR-30c-5p	hsa-miR-191-5p	hsa-let-7e-5p	hsa-miR-15b-5p	hsa-miR-373-3p	hsa-miR-26b-5p	hsa-miR-26a-5p	hsa-miR-935	hsa-miR-331-3p	hsa-miR-142-3p	hsa-miR-92a-3p	hsa-miR-148b-3p	hsa-miR-34a-5p	hsa-miR-30e-5p	hsa-let-7b-5p	hsa-miR-181a-5p	hsa-miR-378a-5p	hsa-miR-339-5p	hsa-miR-92b-3p	hsa-miR-124-3p	hsa-miR-106b-3p	hsa-miR-335-5p	hsa-miR-1260b
P04397_p53_pathway_by_glucose_deprivation	Pathways	hsa-miR-125b-5p	hsa-miR-302c-3p	hsa-miR-197-3p	hsa-miR-708-5p	hsa-miR-302a-3p	hsa-miR-150-5p	hsa-miR-149-5p	hsa-miR-302d-3p	hsa-miR-1-3p	hsa-miR-215-5p	hsa-miR-130b-3p	hsa-miR-30a-5p	hsa-miR-10b-5p	hsa-miR-184	hsa-miR-1285-3p	hsa-miR-877-3p	hsa-miR-143-3p	hsa-miR-214-3p	hsa-miR-149-3p	hsa-miR-296-3p	hsa-miR-185-5p	hsa-miR-93-5p	hsa-miR-340-3p	hsa-miR-193b-3p	hsa-miR-16-5p	hsa-miR-26b-5p	hsa-miR-15a-5p	hsa-miR-615-3p	hsa-miR-454-3p	hsa-miR-519d-3p	hsa-miR-25-3p	hsa-miR-605-5p	hsa-miR-302b-3p	hsa-miR-146b-5p	hsa-miR-421	hsa-miR-1296-5p	hsa-miR-122-5p	hsa-miR-182-5p	hsa-miR-155-5p	hsa-miR-21-5p	hsa-miR-29c-3p	hsa-miR-652-3p	hsa-miR-148b-3p	hsa-miR-125a-5p	hsa-miR-205-5p	hsa-miR-19b-3p	hsa-miR-186-5p	hsa-miR-485-5p
hsa00300_Lysine_biosynthesis	Pathways	hsa-miR-132-3p	hsa-miR-192-5p	hsa-miR-215-5p	hsa-miR-103a-3p	hsa-miR-16-5p	hsa-miR-98-5p	hsa-miR-10b-5p
hsa00620_Pyruvate_metabolism	Pathways	hsa-miR-125b-5p	hsa-miR-423-3p	hsa-miR-197-3p	hsa-miR-3187-3p	hsa-miR-497-5p	hsa-miR-1180-3p	hsa-miR-221-3p	hsa-miR-130b-5p	hsa-miR-125a-5p	hsa-miR-1-3p	hsa-miR-215-5p	hsa-let-7a-5p	hsa-miR-30a-5p	hsa-miR-100-5p	hsa-miR-330-3p	hsa-miR-328-3p	hsa-miR-30d-5p	hsa-miR-877-3p	hsa-miR-33a-5p	hsa-miR-935	hsa-miR-16-5p	hsa-miR-25-3p	hsa-miR-15b-5p	hsa-miR-99a-5p	hsa-miR-133b	hsa-miR-24-3p	hsa-miR-222-3p	hsa-miR-320c	hsa-miR-193b-3p	hsa-miR-1260b	hsa-miR-484	hsa-miR-1301-3p	hsa-miR-615-3p	hsa-miR-331-3p	hsa-miR-191-5p	hsa-miR-186-3p	hsa-miR-425-3p	hsa-miR-92a-3p	hsa-miR-324-3p	hsa-miR-122-5p	hsa-miR-342-5p	hsa-miR-296-3p	hsa-miR-21-5p	hsa-miR-326	hsa-miR-23b-3p	hsa-miR-148b-3p	hsa-miR-23a-3p	hsa-miR-34a-5p
P00056_VEGF_signaling_pathway	Pathways	hsa-miR-125b-5p	hsa-miR-150-5p	hsa-miR-19b-1-5p	hsa-miR-130b-3p	hsa-miR-96-5p	hsa-miR-877-3p	hsa-miR-33a-5p	hsa-miR-143-3p	hsa-miR-149-3p	hsa-miR-296-3p	hsa-miR-1914-3p	hsa-miR-22-3p	hsa-miR-26b-5p	hsa-miR-484	hsa-miR-615-3p	hsa-miR-1229-3p	hsa-miR-92a-3p	hsa-miR-342-3p	hsa-miR-182-5p	hsa-miR-324-5p	hsa-miR-24-2-5p	hsa-miR-1292-5p	hsa-miR-766-3p	hsa-miR-181d-5p	hsa-miR-199a-3p	hsa-miR-519c-3p	hsa-miR-98-5p	hsa-let-7i-5p	hsa-miR-92b-3p	hsa-miR-124-3p	hsa-miR-106b-5p	hsa-miR-181c-5p	hsa-miR-199b-5p	hsa-miR-744-5p	hsa-miR-101-3p	hsa-miR-134-5p	hsa-miR-503-5p	hsa-miR-200c-3p	hsa-miR-18a-3p	hsa-miR-193a-3p	hsa-miR-125a-5p	hsa-miR-302c-3p	hsa-miR-383-5p	hsa-miR-30a-5p	hsa-miR-15b-5p	hsa-miR-99a-5p	hsa-miR-7-5p	hsa-miR-15a-5p
hsa03060_Protein_export	Pathways	hsa-miR-132-3p	hsa-miR-671-5p	hsa-miR-1229-3p	hsa-miR-1-3p	hsa-miR-215-5p	hsa-miR-877-3p	hsa-miR-30a-5p	hsa-miR-100-5p	hsa-miR-25-3p	hsa-miR-192-5p	hsa-miR-16-5p	hsa-miR-296-3p	hsa-miR-365a-3p	hsa-miR-92a-3p	hsa-miR-193b-3p	hsa-let-7e-5p	hsa-miR-26b-5p	hsa-miR-484	hsa-miR-15a-5p	hsa-miR-615-3p	hsa-miR-93-3p	hsa-miR-196a-5p	hsa-miR-30b-5p	hsa-miR-421	hsa-miR-182-5p	hsa-miR-320b	hsa-miR-21-5p	hsa-miR-1260b	hsa-miR-128-3p	hsa-miR-221-3p	hsa-miR-423-5p	hsa-let-7b-5p	hsa-miR-98-5p	hsa-miR-423-3p	hsa-miR-30c-2-3p	hsa-miR-133a-3p	hsa-miR-92b-3p	hsa-miR-124-3p	hsa-miR-33b-5p	hsa-miR-301b-3p	hsa-miR-155-5p	hsa-miR-335-5p	hsa-miR-320a	hsa-miR-18a-3p	hsa-miR-324-5p	hsa-miR-30c-1-3p
P00051_TCA_cycle	Pathways	hsa-miR-183-5p	hsa-miR-7-5p	hsa-miR-423-3p	hsa-miR-339-5p	hsa-miR-1260b	hsa-miR-615-3p	hsa-miR-361-5p	hsa-miR-92a-3p	hsa-miR-34a-5p	hsa-miR-877-3p	hsa-miR-30a-5p	hsa-miR-335-5p	hsa-miR-320a	hsa-miR-25-3p	hsa-miR-16-5p	hsa-miR-26b-5p
WP12_Osteoclast_Signaling	Pathways	hsa-miR-18a-5p	hsa-miR-125a-5p	hsa-miR-215-5p	hsa-miR-877-5p	hsa-miR-146a-5p	hsa-miR-30c-5p	hsa-miR-33a-5p	hsa-miR-214-3p	hsa-miR-296-3p	hsa-miR-365a-3p	hsa-miR-193b-3p	hsa-miR-26b-5p	hsa-miR-26a-5p	hsa-miR-204-5p	hsa-miR-331-3p	hsa-miR-421	hsa-miR-122-5p	hsa-miR-21-5p	hsa-miR-10a-5p	hsa-miR-140-3p	hsa-miR-34a-5p	hsa-miR-145-5p	hsa-let-7a-5p	hsa-let-7b-5p	hsa-miR-98-5p	hsa-miR-124-3p	hsa-miR-106b-5p	hsa-miR-192-5p	hsa-miR-146b-3p	hsa-miR-744-5p	hsa-miR-299-5p	hsa-miR-335-5p
hsa00520_Amino_sugar_and_nucleotide_sugar_metabolism	Pathways	hsa-miR-125b-5p	hsa-miR-197-3p	hsa-miR-671-5p	hsa-miR-9-5p	hsa-miR-1180-3p	hsa-miR-149-5p	hsa-miR-21-5p	hsa-miR-1-3p	hsa-miR-215-5p	hsa-miR-30a-5p	hsa-miR-455-3p	hsa-miR-10b-5p	hsa-miR-877-3p	hsa-miR-331-3p	hsa-miR-16-5p	hsa-miR-93-3p	hsa-miR-4326	hsa-miR-590-3p	hsa-miR-296-3p	hsa-miR-155-5p	hsa-miR-193b-3p	hsa-miR-143-3p	hsa-miR-26b-5p	hsa-miR-484	hsa-miR-122-5p	hsa-miR-15a-5p	hsa-miR-615-3p	hsa-miR-148a-5p	hsa-miR-148b-3p	hsa-miR-30b-5p	hsa-miR-24-3p	hsa-miR-1229-3p	hsa-miR-92a-3p	hsa-miR-1296-5p	hsa-miR-93-5p	hsa-miR-1225-5p	hsa-miR-346	hsa-miR-320b	hsa-miR-10a-5p	hsa-miR-125a-5p	hsa-miR-34a-5p	hsa-miR-421	hsa-miR-92b-5p	hsa-miR-17-5p	hsa-let-7b-5p	hsa-miR-20a-3p	hsa-miR-98-5p	hsa-miR-23b-3p
WP35_G_Protein_Signaling_Pathways	Pathways	hsa-miR-125b-5p	hsa-miR-24-2-5p	hsa-miR-130b-3p	hsa-miR-96-5p	hsa-miR-218-5p	hsa-miR-877-3p	hsa-miR-33a-5p	hsa-miR-143-3p	hsa-miR-22-3p	hsa-miR-26b-5p	hsa-miR-484	hsa-miR-615-3p	hsa-miR-92a-3p	hsa-miR-342-3p	hsa-miR-182-5p	hsa-miR-324-5p	hsa-miR-423-5p	hsa-miR-181d-5p	hsa-miR-1296-5p	hsa-miR-30d-5p	hsa-miR-98-5p	hsa-miR-92b-3p	hsa-miR-32-5p	hsa-miR-124-3p	hsa-miR-106b-5p	hsa-miR-181c-5p	hsa-miR-744-5p	hsa-miR-101-3p	hsa-miR-200c-3p	hsa-miR-18a-3p	hsa-miR-877-5p	hsa-miR-425-5p	hsa-miR-148a-3p	hsa-miR-99a-5p	hsa-miR-7-5p	hsa-miR-1260b	hsa-miR-26a-5p	hsa-miR-622	hsa-miR-505-5p	hsa-miR-324-3p	hsa-miR-93-5p	hsa-miR-148b-3p	hsa-miR-221-3p	hsa-miR-34a-5p	hsa-miR-365a-3p	hsa-miR-769-5p	hsa-miR-23b-3p	hsa-miR-423-3p
WP501_GPCRs_Class_C_Metabotropic_glutamate_pheromone	Pathways	hsa-miR-135b-5p	hsa-miR-124-3p	hsa-miR-26b-5p	hsa-miR-34a-5p	hsa-miR-30a-5p	hsa-miR-335-5p	hsa-miR-31-5p
P02776_Serine_glycine_biosynthesis	Pathways	hsa-miR-125b-5p	hsa-miR-296-3p	hsa-miR-1-3p	hsa-miR-423-3p	hsa-miR-124-3p	hsa-miR-193b-3p	hsa-miR-1229-3p	hsa-miR-26b-5p	hsa-miR-92a-3p	hsa-miR-615-3p	hsa-miR-331-3p	hsa-miR-186-5p	hsa-miR-504-5p	hsa-miR-1260b	hsa-let-7a-5p	hsa-miR-342-3p	hsa-miR-122-5p	hsa-miR-16-5p	hsa-miR-107	hsa-miR-940	hsa-miR-155-5p
hsa04912_GnRH_signaling_pathway	Pathways	hsa-miR-125b-5p	hsa-miR-199a-3p	hsa-miR-125a-5p	hsa-let-7a-5p	hsa-miR-96-5p	hsa-miR-877-3p	hsa-miR-33a-5p	hsa-miR-143-3p	hsa-miR-214-3p	hsa-miR-296-3p	hsa-miR-22-3p	hsa-miR-26b-5p	hsa-miR-484	hsa-miR-615-3p	hsa-miR-497-5p	hsa-miR-92a-3p	hsa-miR-342-3p	hsa-miR-182-5p	hsa-miR-324-5p	hsa-miR-520b	hsa-miR-24-2-5p	hsa-miR-338-3p	hsa-miR-219a-5p	hsa-miR-766-3p	hsa-miR-423-5p	hsa-miR-181d-5p	hsa-miR-1296-5p	hsa-miR-98-5p	hsa-miR-92b-3p	hsa-miR-32-5p	hsa-miR-124-3p	hsa-miR-106b-5p	hsa-miR-181c-5p	hsa-miR-744-5p	hsa-miR-101-3p	hsa-miR-18a-3p	hsa-miR-542-5p	hsa-miR-877-5p	hsa-miR-425-5p	hsa-miR-148a-3p	hsa-miR-15b-5p	hsa-miR-99a-5p	hsa-miR-7-5p	hsa-miR-146b-5p	hsa-miR-26a-5p	hsa-miR-15a-5p	hsa-miR-622	hsa-miR-421
hsa05130_Pathogenic_Escherichia_coli_infection	Pathways	hsa-miR-125b-5p	hsa-miR-3934-5p	hsa-miR-24-2-5p	hsa-let-7a-5p	hsa-miR-96-5p	hsa-miR-9-3p	hsa-miR-877-3p	hsa-miR-214-3p	hsa-miR-30a-3p	hsa-miR-296-3p	hsa-miR-22-3p	hsa-miR-26b-5p	hsa-miR-484	hsa-miR-615-3p	hsa-miR-196a-5p	hsa-miR-1229-3p	hsa-miR-92a-3p	hsa-miR-342-3p	hsa-miR-124-3p	hsa-miR-182-5p	hsa-miR-324-5p	hsa-miR-125a-5p	hsa-miR-532-3p	hsa-miR-505-5p	hsa-miR-423-5p	hsa-let-7i-5p	hsa-miR-92b-3p	hsa-miR-1303	hsa-miR-106b-5p	hsa-miR-644a	hsa-miR-744-5p	hsa-miR-92a-1-5p	hsa-miR-200c-3p	hsa-miR-18a-3p	hsa-miR-328-3p	hsa-miR-30c-5p	hsa-miR-30a-5p	hsa-miR-455-3p	hsa-miR-326	hsa-miR-1227-3p	hsa-miR-421	hsa-miR-324-3p	hsa-miR-93-5p	hsa-miR-29a-3p	hsa-miR-137	hsa-miR-1307-3p	hsa-miR-652-3p	hsa-miR-148b-3p
hsa04670_Leukocyte_transendothelial_migration	Pathways	hsa-miR-125b-5p	hsa-miR-559	hsa-miR-150-5p	hsa-miR-24-2-5p	hsa-miR-211-5p	hsa-miR-96-5p	hsa-miR-218-5p	hsa-miR-877-3p	hsa-miR-214-3p	hsa-miR-296-3p	hsa-miR-1914-3p	hsa-miR-26b-5p	hsa-miR-484	hsa-miR-615-3p	hsa-miR-196a-5p	hsa-miR-1229-3p	hsa-miR-92a-3p	hsa-miR-342-3p	hsa-miR-182-5p	hsa-miR-324-5p	hsa-miR-532-3p	hsa-miR-423-5p	hsa-miR-30d-5p	hsa-miR-98-5p	hsa-miR-92b-3p	hsa-miR-644a	hsa-miR-106b-5p	hsa-miR-124-3p	hsa-miR-744-5p	hsa-miR-101-3p	hsa-miR-200c-3p	hsa-miR-18a-3p	hsa-miR-193a-3p	hsa-miR-328-3p	hsa-miR-518b	hsa-miR-9-3p	hsa-miR-1256	hsa-miR-25-3p	hsa-miR-877-5p	hsa-miR-455-3p	hsa-miR-326	hsa-miR-15b-5p	hsa-miR-99a-5p	hsa-miR-7-5p	hsa-miR-1227-3p	hsa-miR-145-5p	hsa-miR-26a-5p	hsa-miR-324-3p
P02759_Pyridoxal_5_phosphate_biosynthesis	Pathways	hsa-miR-18a-5p	hsa-miR-125b-5p	hsa-miR-1260b	hsa-miR-1-3p	hsa-miR-155-5p	hsa-miR-30a-5p	hsa-miR-504-5p	hsa-miR-342-3p	hsa-miR-16-5p	hsa-miR-26b-5p
WP712_Estrogen_signaling_pathway	Pathways	hsa-miR-125b-5p	hsa-miR-210-3p	hsa-miR-24-2-5p	hsa-miR-96-5p	hsa-miR-218-5p	hsa-miR-143-3p	hsa-miR-149-3p	hsa-miR-34c-5p	hsa-miR-22-3p	hsa-miR-26b-5p	hsa-miR-615-3p	hsa-miR-92a-3p	hsa-miR-342-3p	hsa-miR-182-5p	hsa-miR-125a-5p	hsa-miR-766-3p	hsa-miR-181d-5p	hsa-miR-199a-3p	hsa-miR-92b-3p	hsa-miR-124-3p	hsa-miR-106b-5p	hsa-miR-181c-5p	hsa-miR-744-5p	hsa-miR-101-3p	hsa-miR-200c-3p	hsa-miR-18a-3p	hsa-miR-302c-3p	hsa-miR-625-5p	hsa-miR-30a-5p	hsa-miR-148a-3p	hsa-miR-15b-5p	hsa-miR-7-5p	hsa-miR-146b-5p	hsa-miR-26a-5p	hsa-miR-15a-5p	hsa-miR-429	hsa-miR-296-5p	hsa-miR-324-3p	hsa-miR-93-5p	hsa-miR-29a-3p	hsa-miR-148b-3p	hsa-miR-221-3p	hsa-miR-19b-3p	hsa-miR-222-3p	hsa-miR-29b-3p	hsa-miR-769-5p	hsa-miR-133a-3p	hsa-miR-200a-3p
WP170_Nuclear_Receptors	Pathways	hsa-miR-125b-5p	hsa-miR-125a-5p	hsa-miR-130b-3p	hsa-miR-218-5p	hsa-miR-34c-5p	hsa-miR-22-3p	hsa-miR-26b-5p	hsa-miR-484	hsa-miR-615-3p	hsa-miR-765	hsa-miR-196a-5p	hsa-miR-92a-3p	hsa-miR-182-5p	hsa-miR-30b-3p	hsa-miR-766-3p	hsa-miR-629-5p	hsa-miR-30d-5p	hsa-miR-98-5p	hsa-miR-32-5p	hsa-miR-124-3p	hsa-miR-106b-5p	hsa-miR-744-5p	hsa-miR-101-3p	hsa-miR-302c-3p	hsa-miR-30a-5p	hsa-miR-148a-3p	hsa-miR-15b-5p	hsa-miR-24-3p	hsa-miR-26a-5p	hsa-miR-372-3p	hsa-miR-421	hsa-miR-93-5p	hsa-miR-137	hsa-miR-16-2-3p	hsa-miR-148b-3p	hsa-miR-221-3p	hsa-miR-488-5p	hsa-miR-34a-5p	hsa-miR-29b-3p	hsa-miR-133a-3p	hsa-miR-423-3p	hsa-miR-138-5p	hsa-miR-34b-5p	hsa-miR-320c	hsa-miR-335-5p	hsa-miR-449a	hsa-miR-27b-3p	hsa-miR-18a-5p
P02769_Purine_metabolism	Pathways	hsa-miR-124-3p	hsa-miR-26b-5p	hsa-miR-34a-5p	hsa-miR-1-3p	hsa-miR-155-5p	hsa-miR-30a-5p	hsa-miR-335-5p
WP2197_Endothelin	Pathways	hsa-miR-203a-3p	hsa-miR-148a-3p	hsa-miR-197-3p	hsa-miR-671-5p	hsa-miR-9-5p	hsa-miR-598-3p	hsa-miR-199a-3p	hsa-miR-24-2-5p	hsa-miR-1-3p	hsa-let-7a-5p	hsa-miR-30a-5p	hsa-miR-100-5p	hsa-miR-455-3p	hsa-miR-424-5p	hsa-miR-30c-5p	hsa-miR-31-5p	hsa-miR-93-3p	hsa-miR-181a-5p	hsa-miR-28-5p	hsa-miR-15b-5p	hsa-miR-7-5p	hsa-miR-92a-3p	hsa-miR-193b-3p	hsa-miR-26b-5p	hsa-miR-484	hsa-miR-615-3p	hsa-miR-331-3p	hsa-miR-497-5p	hsa-miR-505-3p	hsa-miR-142-3p	hsa-miR-505-5p	hsa-miR-324-3p	hsa-miR-320b	hsa-miR-125b-5p	hsa-miR-199a-5p	hsa-miR-224-5p	hsa-miR-34a-5p	hsa-miR-766-3p	hsa-miR-186-5p	hsa-miR-423-5p	hsa-miR-301a-3p	hsa-miR-17-5p	hsa-miR-1226-3p	hsa-let-7b-5p	hsa-miR-3200-3p	hsa-miR-17-3p	hsa-miR-769-5p	hsa-miR-23b-3p
P02729_Ascorbate_degradation	Pathways	hsa-miR-1260b	hsa-miR-142-3p
P00032_Insulin_IGF_pathway_mitogen_activated_protein_kinase_kinase_MAP_kinase_cascade	Pathways	hsa-miR-125b-5p	hsa-miR-150-5p	hsa-miR-1226-3p	hsa-miR-877-3p	hsa-miR-33a-5p	hsa-miR-214-3p	hsa-miR-18a-5p	hsa-miR-26b-5p	hsa-miR-484	hsa-miR-615-3p	hsa-miR-497-5p	hsa-miR-196a-5p	hsa-miR-92a-3p	hsa-miR-766-3p	hsa-miR-199a-3p	hsa-miR-98-5p	hsa-miR-657	hsa-miR-92b-3p	hsa-miR-124-3p	hsa-miR-744-5p	hsa-miR-101-3p	hsa-miR-503-5p	hsa-miR-18a-3p	hsa-miR-139-5p	hsa-miR-383-5p	hsa-miR-30a-5p	hsa-miR-148a-3p	hsa-miR-15b-5p	hsa-miR-99a-5p	hsa-miR-7-5p	hsa-miR-26a-5p	hsa-miR-1296-5p	hsa-miR-93-5p	hsa-miR-29a-3p	hsa-miR-652-3p	hsa-miR-483-5p	hsa-miR-221-3p	hsa-miR-194-5p	hsa-miR-433-3p	hsa-miR-29b-3p	hsa-miR-769-5p	hsa-miR-23b-3p	hsa-miR-423-3p	hsa-miR-138-5p	hsa-miR-320b	hsa-miR-376c-3p	hsa-miR-132-3p	hsa-miR-28-5p
WP727_Monoamine_Transport	Pathways	hsa-miR-125b-5p	hsa-miR-197-3p	hsa-miR-203a-3p	hsa-miR-215-5p	hsa-miR-130b-3p	hsa-miR-141-3p	hsa-miR-30c-5p	hsa-miR-24-3p	hsa-miR-92a-3p	hsa-miR-26b-5p	hsa-miR-204-5p	hsa-miR-421	hsa-miR-21-5p	hsa-miR-7-5p	hsa-miR-34a-5p	hsa-miR-221-3p	hsa-miR-296-3p	hsa-miR-17-5p	hsa-let-7a-5p	hsa-let-7b-5p	hsa-miR-98-5p	hsa-miR-200a-3p	hsa-miR-124-3p	hsa-miR-106b-5p	hsa-miR-192-5p	hsa-miR-20a-5p	hsa-miR-744-5p	hsa-miR-23a-3p	hsa-miR-335-5p	hsa-miR-320a	hsa-miR-425-5p	hsa-miR-375
P02788_Xanthine_and_guanine_salvage_pathway	Pathways	hsa-miR-133a-3p	hsa-miR-124-3p	hsa-miR-193b-3p	hsa-miR-34a-5p	hsa-miR-1-3p	hsa-miR-186-5p	hsa-miR-196a-5p	hsa-miR-30c-5p	hsa-miR-1296-5p	hsa-miR-16-5p
P00030_Hypoxia_response_via_HIF_activation	Pathways	hsa-miR-125b-5p	hsa-miR-130b-3p	hsa-miR-877-3p	hsa-miR-33a-5p	hsa-miR-143-3p	hsa-miR-214-3p	hsa-miR-149-3p	hsa-miR-296-3p	hsa-miR-22-3p	hsa-miR-26b-5p	hsa-miR-92a-3p	hsa-miR-182-5p	hsa-miR-324-5p	hsa-miR-30b-3p	hsa-miR-324-3p	hsa-miR-519c-3p	hsa-miR-144-3p	hsa-miR-98-5p	hsa-let-7i-5p	hsa-miR-124-3p	hsa-miR-106b-5p	hsa-miR-199b-5p	hsa-miR-744-5p	hsa-miR-18a-3p	hsa-miR-302c-3p	hsa-miR-30a-5p	hsa-miR-15b-5p	hsa-miR-99a-5p	hsa-miR-7-5p	hsa-miR-26a-5p	hsa-miR-15a-5p	hsa-miR-1296-5p	hsa-miR-93-5p	hsa-miR-29a-3p	hsa-miR-148b-3p	hsa-miR-221-3p	hsa-miR-146b-5p	hsa-miR-29b-3p	hsa-miR-769-5p	hsa-miR-23b-3p	hsa-miR-133a-3p	hsa-miR-423-3p	hsa-miR-138-5p	hsa-miR-519a-3p	hsa-miR-335-5p	hsa-miR-18a-5p	hsa-miR-376a-3p	hsa-miR-302a-3p
P02777_Succinate_to_proprionate_conversion	Pathways	hsa-miR-155-5p	hsa-miR-26b-5p	hsa-miR-378a-3p	hsa-miR-615-3p	hsa-let-7b-5p
hsa00500_Starch_and_sucrose_metabolism	Pathways	hsa-miR-125b-5p	hsa-miR-671-5p	hsa-miR-9-5p	hsa-miR-1180-3p	hsa-miR-149-5p	hsa-miR-1-3p	hsa-miR-215-5p	hsa-miR-30a-5p	hsa-miR-455-3p	hsa-miR-10b-5p	hsa-miR-191-5p	hsa-miR-143-3p	hsa-miR-296-3p	hsa-miR-744-5p	hsa-miR-193b-3p	hsa-miR-16-5p	hsa-miR-26b-5p	hsa-miR-484	hsa-miR-15a-5p	hsa-miR-615-3p	hsa-miR-331-3p	hsa-miR-99b-5p	hsa-miR-24-3p	hsa-miR-1229-3p	hsa-miR-92a-3p	hsa-miR-1296-5p	hsa-miR-122-5p	hsa-miR-346	hsa-miR-10a-5p	hsa-miR-125a-5p	hsa-miR-142-3p	hsa-miR-34a-5p	hsa-miR-92b-5p	hsa-miR-17-5p	hsa-let-7b-5p	hsa-miR-20a-3p	hsa-miR-98-5p	hsa-miR-23b-3p	hsa-miR-93-5p	hsa-miR-32-5p	hsa-miR-124-3p	hsa-miR-106b-5p	hsa-miR-192-5p	hsa-miR-20a-5p	hsa-miR-155-5p	hsa-miR-23a-3p	hsa-miR-335-5p	hsa-miR-375
hsa05332_Graft_versus_host_disease	Pathways	hsa-miR-132-3p	hsa-miR-9-5p	hsa-miR-26a-5p	hsa-miR-203a-3p	hsa-miR-152-3p	hsa-miR-1-3p	hsa-miR-204-5p	hsa-miR-191-5p	hsa-let-7e-5p	hsa-miR-148a-3p	hsa-miR-15b-5p	hsa-miR-296-3p	hsa-miR-365a-3p	hsa-miR-16-5p	hsa-miR-26b-5p	hsa-miR-484	hsa-miR-15a-5p	hsa-miR-615-3p	hsa-miR-92a-3p	hsa-miR-122-5p	hsa-miR-409-3p	hsa-miR-21-5p	hsa-miR-148b-3p	hsa-miR-504-5p	hsa-let-7a-5p	hsa-miR-146a-5p	hsa-miR-98-5p	hsa-miR-29b-3p	hsa-miR-423-3p	hsa-miR-124-3p	hsa-miR-183-5p	hsa-miR-181c-5p	hsa-miR-155-5p	hsa-miR-335-5p	hsa-miR-106a-5p
hsa04810_Regulation_of_actin_cytoskeleton	Pathways	hsa-miR-18a-5p	hsa-miR-559	hsa-miR-125b-5p	hsa-miR-210-3p	hsa-miR-199a-3p	hsa-miR-125a-5p	hsa-miR-941	hsa-let-7a-5p	hsa-miR-96-5p	hsa-miR-218-5p	hsa-miR-877-3p	hsa-miR-143-3p	hsa-miR-296-3p	hsa-miR-373-3p	hsa-miR-26b-5p	hsa-miR-484	hsa-miR-615-3p	hsa-miR-497-5p	hsa-miR-196a-5p	hsa-miR-1229-3p	hsa-miR-92a-3p	hsa-miR-342-3p	hsa-miR-182-5p	hsa-miR-324-5p	hsa-miR-1224-5p	hsa-miR-19b-1-5p	hsa-miR-766-3p	hsa-miR-423-5p	hsa-miR-181d-5p	hsa-miR-1296-5p	hsa-miR-500a-3p	hsa-miR-98-5p	hsa-let-7i-5p	hsa-miR-92b-3p	hsa-miR-32-5p	hsa-miR-124-3p	hsa-miR-106b-5p	hsa-miR-644a	hsa-miR-129-1-3p	hsa-miR-744-5p	hsa-miR-101-3p	hsa-miR-503-5p	hsa-miR-200c-3p	hsa-miR-18a-3p	hsa-miR-193a-3p	hsa-miR-328-3p	hsa-miR-181c-5p	hsa-miR-9-3p
WP437_EGF_EGFR_Signaling_Pathway	Pathways	hsa-miR-125b-5p	hsa-miR-559	hsa-miR-125a-5p	hsa-miR-1226-3p	hsa-miR-96-5p	hsa-miR-218-5p	hsa-miR-877-3p	hsa-miR-33a-5p	hsa-miR-143-3p	hsa-miR-214-3p	hsa-miR-149-3p	hsa-miR-296-3p	hsa-miR-34c-5p	hsa-miR-22-3p	hsa-miR-26b-5p	hsa-miR-484	hsa-miR-615-3p	hsa-miR-497-5p	hsa-miR-196a-5p	hsa-miR-1229-3p	hsa-miR-92a-3p	hsa-miR-342-3p	hsa-miR-182-5p	hsa-miR-324-5p	hsa-miR-520b	hsa-miR-24-2-5p	hsa-miR-532-3p	hsa-miR-766-3p	hsa-miR-421	hsa-miR-423-5p	hsa-miR-181d-5p	hsa-miR-199a-3p	hsa-miR-519c-3p	hsa-miR-144-3p	hsa-miR-98-5p	hsa-miR-92b-3p	hsa-miR-32-5p	hsa-miR-124-3p	hsa-miR-106b-5p	hsa-miR-129-1-3p	hsa-miR-199b-5p	hsa-miR-744-5p	hsa-miR-101-3p	hsa-miR-374a-5p	hsa-miR-503-5p	hsa-miR-200c-3p	hsa-miR-18a-3p	hsa-miR-193a-3p
P00048_PI3_kinase_pathway	Pathways	hsa-miR-125b-5p	hsa-miR-146b-5p	hsa-miR-19b-1-5p	hsa-miR-130b-3p	hsa-miR-96-5p	hsa-miR-141-3p	hsa-miR-519c-3p	hsa-miR-877-3p	hsa-miR-143-3p	hsa-miR-214-3p	hsa-miR-149-3p	hsa-miR-296-3p	hsa-miR-26b-5p	hsa-miR-484	hsa-miR-615-3p	hsa-miR-196a-5p	hsa-miR-1229-3p	hsa-miR-92a-3p	hsa-miR-342-3p	hsa-miR-182-5p	hsa-miR-324-5p	hsa-miR-520b	hsa-miR-125a-5p	hsa-miR-338-3p	hsa-miR-423-5p	hsa-miR-181d-5p	hsa-miR-324-3p	hsa-miR-30d-5p	hsa-miR-144-3p	hsa-miR-98-5p	hsa-miR-92b-3p	hsa-miR-124-3p	hsa-miR-106b-5p	hsa-miR-181c-5p	hsa-miR-744-5p	hsa-miR-101-3p	hsa-miR-374a-5p	hsa-miR-503-5p	hsa-miR-18a-3p	hsa-miR-302c-3p	hsa-miR-499a-5p	hsa-miR-877-5p	hsa-miR-455-3p	hsa-miR-148a-3p	hsa-miR-15b-5p	hsa-miR-7-5p	hsa-miR-340-3p	hsa-miR-26a-5p
P02726_Aminobutyrate_degradation	Pathways	hsa-miR-24-3p	hsa-miR-192-5p	hsa-miR-215-5p	hsa-miR-155-5p	hsa-miR-335-5p	hsa-miR-30c-5p
hsa00510_N_Glycan_biosynthesis	Pathways	hsa-miR-18a-5p	hsa-miR-125b-5p	hsa-miR-26a-5p	hsa-miR-1229-3p	hsa-miR-17-5p	hsa-miR-149-5p	hsa-miR-18b-5p	hsa-miR-1-3p	hsa-miR-215-5p	hsa-miR-877-3p	hsa-miR-30a-5p	hsa-miR-100-5p	hsa-miR-96-5p	hsa-miR-10b-5p	hsa-let-7b-5p	hsa-miR-30c-5p	hsa-miR-16-5p	hsa-miR-25-3p	hsa-miR-15b-5p	hsa-miR-7-5p	hsa-miR-222-3p	hsa-miR-93-5p	hsa-miR-3619-5p	hsa-let-7e-5p	hsa-miR-26b-5p	hsa-miR-484	hsa-miR-615-3p	hsa-miR-93-3p	hsa-miR-142-3p	hsa-miR-92a-3p	hsa-miR-324-3p	hsa-miR-122-5p	hsa-miR-324-5p	hsa-miR-769-5p	hsa-miR-21-5p	hsa-miR-330-5p	hsa-miR-10a-5p	hsa-miR-23a-3p	hsa-miR-34a-5p	hsa-miR-133a-3p	hsa-miR-221-3p	hsa-miR-24-3p	hsa-miR-19b-3p	hsa-miR-1296-5p	hsa-miR-30d-5p	hsa-miR-181a-5p	hsa-miR-181b-5p	hsa-miR-98-5p
P04394_Thyrotropin_releasing_hormone_receptor_signaling_pathway	Pathways	hsa-miR-9-5p	hsa-miR-197-3p	hsa-miR-24-2-5p	hsa-miR-1-3p	hsa-miR-215-5p	hsa-miR-130b-3p	hsa-miR-30a-5p	hsa-miR-196b-5p	hsa-miR-96-5p	hsa-miR-30c-5p	hsa-miR-31-5p	hsa-let-7e-5p	hsa-miR-148a-3p	hsa-miR-7-5p	hsa-miR-1914-3p	hsa-miR-155-5p	hsa-miR-193b-3p	hsa-miR-16-5p	hsa-miR-26b-5p	hsa-miR-484	hsa-miR-615-3p	hsa-miR-331-3p	hsa-miR-205-5p	hsa-miR-505-3p	hsa-miR-142-3p	hsa-miR-92a-3p	hsa-miR-342-3p	hsa-miR-93-5p	hsa-miR-324-5p	hsa-miR-21-5p	hsa-miR-29c-3p	hsa-miR-505-5p	hsa-miR-34a-5p	hsa-miR-186-5p	hsa-miR-423-5p	hsa-miR-19b-3p	hsa-miR-17-5p	hsa-let-7b-5p	hsa-miR-181a-5p	hsa-miR-98-5p	hsa-miR-17-3p	hsa-miR-128-3p	hsa-miR-92b-3p	hsa-miR-124-3p	hsa-miR-192-5p	hsa-miR-589-3p	hsa-miR-27b-3p	hsa-miR-27a-3p
P00003_Alzheimer_disease_amyloid_secretase_pathway	Pathways	hsa-miR-125b-5p	hsa-miR-24-2-5p	hsa-miR-1226-3p	hsa-miR-96-5p	hsa-miR-33a-5p	hsa-miR-143-3p	hsa-miR-214-3p	hsa-miR-296-3p	hsa-miR-373-3p	hsa-miR-26b-5p	hsa-miR-484	hsa-miR-615-3p	hsa-miR-196a-5p	hsa-miR-92a-3p	hsa-miR-342-3p	hsa-miR-125a-5p	hsa-miR-532-3p	hsa-miR-766-3p	hsa-miR-421	hsa-miR-199a-3p	hsa-miR-92b-3p	hsa-miR-124-3p	hsa-miR-106b-5p	hsa-miR-744-5p	hsa-miR-101-3p	hsa-miR-30a-5p	hsa-miR-15b-5p	hsa-miR-99a-5p	hsa-miR-7-5p	hsa-miR-1260b	hsa-miR-15a-5p	hsa-miR-3620-3p	hsa-miR-505-5p	hsa-miR-324-3p	hsa-miR-93-5p	hsa-miR-29a-3p	hsa-miR-652-3p	hsa-miR-148b-3p	hsa-miR-483-5p	hsa-miR-19b-3p	hsa-miR-29b-3p	hsa-miR-769-5p	hsa-miR-133a-3p	hsa-miR-423-3p	hsa-miR-200a-3p	hsa-miR-500a-5p	hsa-miR-320b	hsa-miR-320a
hsa04622_RIG_I_like_receptor_signaling_pathway	Pathways	hsa-miR-125b-5p	hsa-miR-210-3p	hsa-miR-19b-1-5p	hsa-miR-96-5p	hsa-miR-218-5p	hsa-miR-877-3p	hsa-miR-33a-5p	hsa-miR-214-3p	hsa-miR-373-3p	hsa-miR-26b-5p	hsa-miR-484	hsa-miR-204-5p	hsa-miR-92a-3p	hsa-miR-182-5p	hsa-miR-324-5p	hsa-miR-140-3p	hsa-miR-505-5p	hsa-miR-199a-3p	hsa-miR-92b-3p	hsa-miR-124-3p	hsa-miR-106b-5p	hsa-miR-200c-3p	hsa-miR-125a-5p	hsa-miR-130b-5p	hsa-miR-877-5p	hsa-miR-15b-5p	hsa-miR-99a-5p	hsa-miR-7-5p	hsa-miR-1260b	hsa-miR-26a-5p	hsa-miR-15a-5p	hsa-miR-296-5p	hsa-miR-421	hsa-miR-93-5p	hsa-miR-30e-3p	hsa-miR-221-3p	hsa-miR-146a-5p	hsa-miR-1226-5p	hsa-miR-29b-3p	hsa-miR-23b-3p	hsa-miR-423-3p	hsa-miR-200a-3p	hsa-miR-335-5p	hsa-miR-320a	hsa-miR-27b-3p	hsa-miR-203a-3p	hsa-let-7g-5p	hsa-miR-151a-3p
WP691_Tamoxifen_metabolism	Pathways	hsa-miR-132-3p	hsa-miR-340-5p	hsa-miR-296-3p	hsa-miR-199a-5p	hsa-miR-488-3p	hsa-miR-124-3p	hsa-miR-26b-5p	hsa-miR-631	hsa-miR-107	hsa-miR-221-3p	hsa-miR-24-3p	hsa-miR-488-5p	hsa-miR-335-5p	hsa-miR-320a	hsa-let-7b-5p	hsa-miR-27b-3p	hsa-miR-103a-3p
WP1559_TFs_Regulate_miRNAs_related_to_cardiac_hypertrophy	Pathways	hsa-miR-125b-5p	hsa-miR-302c-3p	hsa-miR-708-5p	hsa-miR-302a-3p	hsa-miR-149-5p	hsa-miR-302d-3p	hsa-miR-30a-5p	hsa-miR-184	hsa-miR-877-3p	hsa-miR-143-3p	hsa-miR-149-3p	hsa-miR-24-3p	hsa-miR-185-5p	hsa-miR-146b-5p	hsa-miR-193b-3p	hsa-miR-16-5p	hsa-miR-26b-5p	hsa-miR-15a-5p	hsa-miR-302b-3p	hsa-miR-210-3p	hsa-miR-92a-3p	hsa-miR-1296-5p	hsa-miR-93-5p	hsa-miR-155-5p	hsa-miR-20b-5p	hsa-miR-21-5p	hsa-miR-10a-5p	hsa-miR-532-3p	hsa-miR-34a-5p	hsa-miR-337-3p	hsa-let-7a-5p	hsa-miR-146a-5p	hsa-miR-9-5p	hsa-miR-423-3p	hsa-miR-124-3p	hsa-miR-183-5p	hsa-miR-451a	hsa-miR-20a-5p	hsa-miR-744-5p	hsa-miR-633	hsa-let-7e-5p
WP410_Diurnally_regulated_genes_with_circadian_orthologs	Pathways	hsa-miR-125b-5p	hsa-miR-125a-5p	hsa-miR-130b-3p	hsa-miR-218-5p	hsa-miR-877-3p	hsa-miR-33a-5p	hsa-miR-214-3p	hsa-miR-641	hsa-miR-296-3p	hsa-miR-373-3p	hsa-miR-26b-5p	hsa-miR-484	hsa-miR-615-3p	hsa-miR-196a-5p	hsa-miR-302a-3p	hsa-miR-92a-3p	hsa-miR-182-5p	hsa-miR-324-5p	hsa-miR-532-3p	hsa-miR-423-5p	hsa-miR-98-5p	hsa-miR-92b-3p	hsa-miR-32-5p	hsa-miR-124-3p	hsa-miR-106b-5p	hsa-miR-744-5p	hsa-miR-101-3p	hsa-miR-200c-3p	hsa-miR-130b-5p	hsa-miR-30a-5p	hsa-miR-455-3p	hsa-miR-151a-5p	hsa-miR-148a-3p	hsa-miR-15b-5p	hsa-miR-129-5p	hsa-miR-24-3p	hsa-miR-26a-5p	hsa-miR-15a-5p	hsa-miR-421	hsa-miR-324-3p	hsa-miR-93-5p	hsa-miR-652-3p	hsa-miR-148b-3p	hsa-miR-221-3p	hsa-miR-222-3p	hsa-miR-23b-3p	hsa-miR-133a-3p	hsa-miR-335-5p
WP560_TGF_beta_Signaling_Pathway2	Pathways	hsa-miR-125b-5p	hsa-miR-210-3p	hsa-miR-150-5p	hsa-miR-125a-5p	hsa-miR-130b-3p	hsa-miR-218-5p	hsa-miR-30a-3p	hsa-miR-143-3p	hsa-miR-214-3p	hsa-miR-26b-5p	hsa-miR-484	hsa-miR-204-5p	hsa-miR-196a-5p	hsa-miR-1180-3p	hsa-miR-92a-3p	hsa-miR-342-3p	hsa-miR-182-5p	hsa-miR-324-5p	hsa-miR-409-3p	hsa-miR-320b	hsa-miR-520h	hsa-miR-532-3p	hsa-miR-483-3p	hsa-miR-181d-5p	hsa-miR-199a-3p	hsa-miR-30d-5p	hsa-miR-98-5p	hsa-miR-92b-3p	hsa-miR-124-3p	hsa-miR-106b-5p	hsa-miR-744-5p	hsa-miR-101-3p	hsa-miR-374a-5p	hsa-miR-200c-3p	hsa-miR-10b-5p	hsa-miR-139-5p	hsa-miR-130b-5p	hsa-miR-30c-5p	hsa-miR-30a-5p	hsa-miR-455-3p	hsa-miR-15b-5p	hsa-miR-99a-5p	hsa-miR-7-5p	hsa-miR-146b-5p	hsa-miR-26a-5p	hsa-miR-15a-5p	hsa-miR-429	hsa-miR-505-5p
[truncated: 252 more columns]
