# Supplementary material for: Establishing and validating a pathway prognostic signature in pancreatic cancer based on miRNA and mRNA sets using GSVA
Source: Aging (Albany NY). 2020 Nov 10;12(22):22840–58. doi: 10.18632/aging.103965 (PMC7746356; doi:10.18632/aging.103965)
Supplement: Supplementary Table 3 [file aging-12-103965-s004..xlsx]

## Sheet: Sheet1
Supplementary Table 3. The mRNA sets file including linoleic acid metabolism, the pentose phosphate pathway, the ARENRF2 pathway, monoamine transport, and fatty acid elongation acquiring from the MSigDB.
KEGG_LINOLEIC_ACID_METABOLISM	> Linoleic acid metabolism	AKR1B10	ALOX15	CYP1A2	CYP2C18	CYP2C19	CYP2C8	CYP2C9	CYP2E1	CYP2J2	CYP3A4	CYP3A43	CYP3A5	CYP3A7	JMJD7-PLA2G4B	PLA2G10	PLA2G12A	PLA2G12B	PLA2G1B	PLA2G2A	PLA2G2C	PLA2G2D	PLA2G2E	PLA2G2F	PLA2G3	PLA2G4A	PLA2G4B	PLA2G4E	PLA2G5	PLA2G6
REACTOME_PENTOSE_PHOSPHATE_PATHWAY	> Pentose phosphate pathway	AC010618.1	DERA	G6PD	PGD	PGM2	PRPS1	PRPS1L1	PRPS2	RBKS	RPE	RPEL1	RPIA	SHPK	TALDO1	TKT
BIOCARTA_ARENRF2_PATHWAY	> Oxidative Stress Induced Gene Expression Via Nrf2	AKR7A2	CREB1	CRYZ	FOS	FXYD2	GSTA2	HMOX1	HMOX2	JUN	KEAP1	MAFF	MAFG	MAFK	MAPK1	MAPK14	MAPK8	NFE2L2	POR	PRKCA	PRKCB
GO_MONOAMINE_TRANSPORT	> The directed movement of monoamines, organic compounds that contain one amino group that is connected to an aromatic ring by an ethylene group (-CH2-CH2-), into, out of or within a cell, or between cells, by means of some agent such as a transporter or pore. [CHEBI:25375, GOC:mah]	ABAT	ACTB	ADORA2A	ADRA2A	ADRA2B	ADRA2C	AGT	AGTR2	CARTPT	CHGA	CHRM5	CHRNA4	CHRNA6	CHRNB2	CNR1	CRH	CRHR1	CXCL12	DRD1	DRD2	DRD3	DRD4	DTNBP1	FCER1G	FFAR3	FGF20	GDNF	GHSR	GPM6B	GRK2	HRH3	HTR1A	HTR1B	HTR2A	KCNA2	KCNB1	LILRB1	MAOB	MAPK15	MECP2	NISCH	NOS1	NPY2R	OPRK1	OR13F1	OR56A1	OR56A4	OR56A5
GO_FATTY_ACID_ELONGATION	> The elongation of a fatty acid chain by the sequential addition of two-carbon units. [ISBN:0716720094]	ABCD1	ELOVL1	ELOVL2	ELOVL3	ELOVL4	ELOVL5	ELOVL6	ELOVL7	HACD1	HACD2	HACD3	HACD4	TECR
[truncated: 41 more columns]
